# Supplementary material for: Visible-light-driven anion relay chemistry (ARC): construction of fully substituted pyrazoles
Source: Royal Society of Chemistry journal article supplement (doi:10.1039/d4qo02072c), 2025-01-01
Supplement: d4qo02072c1.pdf [file d4qo02072c1.pdf]

## Supporting Information

### Visible-light-driven Anion Relay Chemistry (ARC):

### Construction of Fully Substituted Pyrazoles

Guodan Lu, Tao Zhang, Xionglve Cheng, Kehan Qian, Yong Wang\* and Xiaobing Wan\*

*Key Laboratory of Organic Synthesis of Jiangsu Province, College of Chemistry, Chemical Engineering and Materials Science, Soochow University, Suzhou, 215123, China*

\* To whom correspondence should be addressed. E-mail: yowang@suda.edu.cn,  
wanxb@suda.edu.cn

### Table of Contents

|                                                                                      |    |
|--------------------------------------------------------------------------------------|----|
| 1. General information .....                                                         | 2  |
| 2. General procedures .....                                                          | 2  |
| 3. Optimization of the reaction conditions .....                                     | 3  |
| 4. Control experiments .....                                                         | 8  |
| 5. Mechanistic investigations .....                                                  | 9  |
| 5.1 Ultraviolet visible absorption experiments .....                                 | 9  |
| 5.2 Stern Volmer quenching .....                                                     | 10 |
| 5.3 Radical quenching experiment .....                                               | 12 |
| 5.4 Triplet quenching experiment .....                                               | 13 |
| 5.5 Replace the photocatalyst for the mechanism study .....                          | 13 |
| 5.6 Cyclic voltammetry (CV) measurements .....                                       | 14 |
| 5.7 Singlet oxygen trapping experiment .....                                         | 15 |
| 5.8 Replace the acetylacetone for the mechanism study .....                          | 16 |
| 6. X-ray data .....                                                                  | 17 |
| 7. DFT calculation .....                                                             | 18 |
| 7.1 DFT computational details .....                                                  | 18 |
| 7.2 DFT calculation for the intramolecular 1, 3-hydrogen migration of the Int3 ..... | 19 |
| 7.3 DFT calculation for the triplet excitation energies for the Int1' .....          | 19 |
| 7.4 Calculated Minimum Energy Crossing Points .....                                  | 21 |
| 7.5 The electron density distribution of the triplet structure .....                 | 21 |
| 7.6 DFT calculations for SET process .....                                           | 22 |
| 7.7 Cartesian Coordinates for the Optimized Structures .....                         | 22 |
| 8. Characterization data of products .....                                           | 74 |

## 1. General information

Column chromatography was generally performed on silica gel (300-400 mesh) and reactions were monitored by thin layer chromatography (TLC) using UV light to visualize the course of the reactions. The  $^1\text{H}$  NMR (400 MHz) and  $^{13}\text{C}$  NMR (100 MHz) and  $^{19}\text{F}$  NMR (376 MHz) data were recorded with Chloroform-*d* or DMSO-*d*<sub>6</sub> as solvent at room temperature unless specified otherwise. The chemical shifts ( $\delta$ ) are reported in ppm and coupling constants (*J*) in Hz.  $^1\text{H}$  NMR spectra was recorded with tetramethylsilane ( $\delta$ = 0.00 ppm) or Chloroform-*d* ( $\delta$ = 7.26 ppm) or DMSO-*d*<sub>6</sub> ( $\delta$  = 2.50 ppm) as internal reference;  $^{13}\text{C}$  NMR spectra was recorded with Chloroform-*d* ( $\delta$  = 77.00 ppm) or DMSO ( $\delta$  = 39.52 ppm) as internal reference. IR and HRMS were performed by the State-authorized Analytical Center in Soochow University.

## 2. General procedures

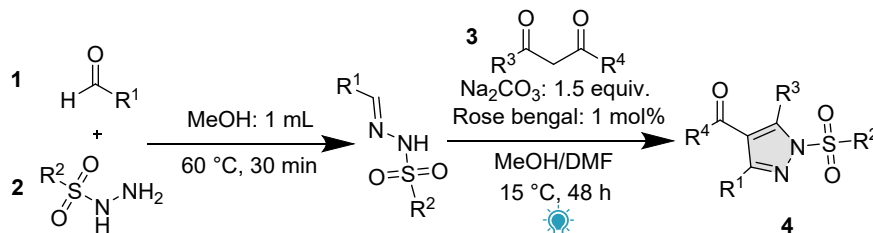

The first step is to add aldehyde **1** (0.2 mmol), sulfonamide **2** (0.4 mmol) and methanol (1 mL) to the reaction tube with magnetic stirring bar, stirring for 30 minutes at 60 °C, then add 1,3-dicarbonyls **3** (0.5 mmol), sodium carbonate (0.3 mmol), Rose Bengal (1 mol%), *N,N*-dimethylformamide (1 mL), irradiation with 3W blue LED lamp for 48 hours. After confirming the finish of the reaction by TLC, the system was quenched with saturated sodium thiosulfate for three times, then extracted with ethyl acetate, merge the organic phase, dried with anhydrous sodium sulfate, then concentrated in vacuum and purified by column chromatography on silica gel to afford the desired products **4**.

### 3. Optimization of the reaction conditions

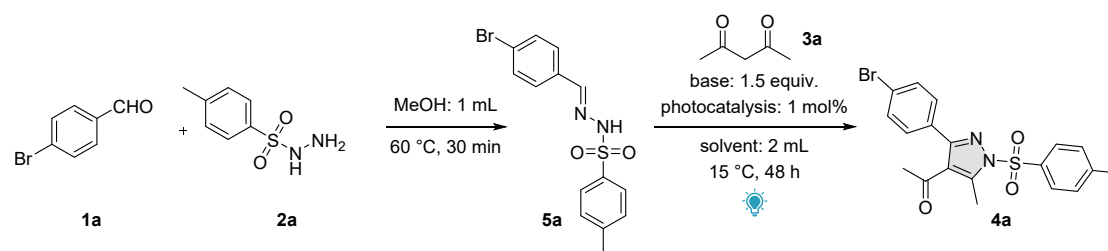

| Entry | Photocatalysis                                          | Base                            | Solvents  | Yield (%) |
|-------|---------------------------------------------------------|---------------------------------|-----------|-----------|
| 1     | 4CzIPN                                                  | Na <sub>2</sub> CO <sub>3</sub> | DMF       | 60        |
| 2     | 4CzIPN                                                  | Na <sub>2</sub> CO <sub>3</sub> | DMSO      | 54        |
| 3     | 4CzIPN                                                  | Na <sub>2</sub> CO <sub>3</sub> | MeOH      | 55        |
| 4     | 4CzIPN                                                  | Na <sub>2</sub> CO <sub>3</sub> | NMP       | 33        |
| 5     | Rhodamine 6G                                            | Na <sub>2</sub> CO <sub>3</sub> | DMF       | 65        |
| 6     | Ru(bpy) <sub>3</sub> Cl <sub>2</sub> ·6H <sub>2</sub> O | Na <sub>2</sub> CO <sub>3</sub> | DMF       | 56        |
| 7     | Rhodamine B                                             | Na <sub>2</sub> CO <sub>3</sub> | DMF       | 7         |
| 8     | Thioxanthone                                            | Na <sub>2</sub> CO <sub>3</sub> | DMF       | 5         |
| 9     | Rose Bengal                                             | Na <sub>2</sub> CO <sub>3</sub> | DMF       | 57        |
| 10    | Rose Bengal                                             | Na <sub>2</sub> CO <sub>3</sub> | MeOH/DMSO | 73        |
| 11    | Rose Bengal                                             | Na <sub>2</sub> CO <sub>3</sub> | DMSO/DMF  | 58        |
| 12    | Rose Bengal                                             | Na <sub>2</sub> CO <sub>3</sub> | NMP/DMF   | 45        |
| 13    | Rose Bengal                                             | Na <sub>2</sub> CO <sub>3</sub> | MeOH/DMF  | 82        |

**Table S1.** Optimization of the reaction conditions for the second step.

General reaction conditions: **1a** (0.2 mmol), **2a** (0.4 mmol), and MeOH (1 mL) were added at 60 °C for 30 minutes. **3a** (0.5 mmol), base (0.3 mmol), photocatalyst (1 mol%) were added, using 2 mL of the solvent and 3W blue LED at 15 °C for 48 h, yields of isolated product.

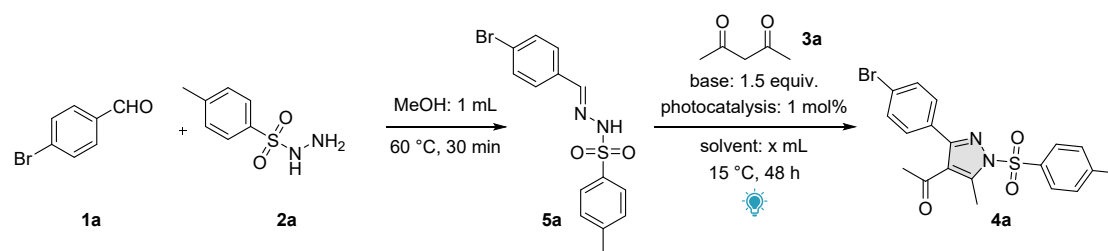

| Entry | Photocatalysis | Base                            | Solvents (MeOH/DMF) | Yield (%) |
|-------|----------------|---------------------------------|---------------------|-----------|
| 1     | Rose Bengal    | Na <sub>2</sub> CO <sub>3</sub> | 0.5 mL/0.5 mL       | 73        |
| 2     | Rose Bengal    | Na <sub>2</sub> CO <sub>3</sub> | 0.5 mL/1.5 mL       | 68        |
| 3     | Rose Bengal    | Na <sub>2</sub> CO <sub>3</sub> | 1.5 mL/0.5 mL       | 70        |
| 4     | Rose Bengal    | Na <sub>2</sub> CO <sub>3</sub> | 1.0 mL/2.0 mL       | 75        |
| 5     | Rose Bengal    | Na <sub>2</sub> CO <sub>3</sub> | 2.0 mL/1.0 mL       | 65        |

**Table S2.** Optimization of the reaction conditions for the second step.

General reaction conditions: **1a** (0.2 mmol), **2a** (0.4 mmol), and MeOH (1 mL) were added at 60 °C for 30 minutes. **3a** (0.5 mmol), base (0.3 mmol), photocatalyst (1 mol%) were added, using mixed solvent and 3W blue LED at 15 °C for 48 h, yields of isolated product.

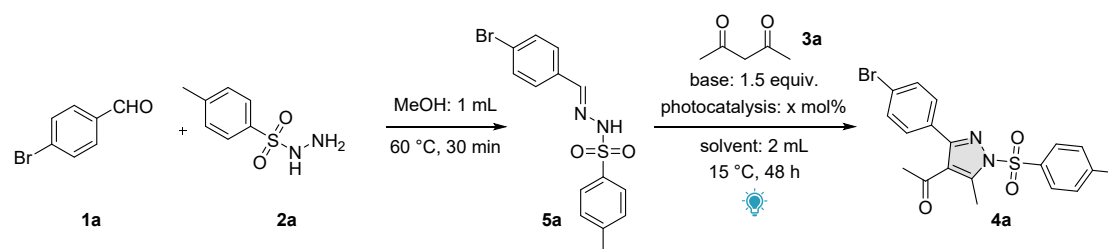

| Entry | Photocatalysis (Rose Bengal) | Base                            | Solvents | Yield (%) |
|-------|------------------------------|---------------------------------|----------|-----------|
| 1     | 0.25 mol%                    | Na <sub>2</sub> CO <sub>3</sub> | MeOH/DMF | 60        |
| 2     | 0.5 mol%                     | Na <sub>2</sub> CO <sub>3</sub> | MeOH/DMF | 73        |
| 3     | 0.75 mol%                    | Na <sub>2</sub> CO <sub>3</sub> | MeOH/DMF | 80        |
| 4     | 1 mol%                       | Na <sub>2</sub> CO <sub>3</sub> | MeOH/DMF | 82        |



|   |          |                                 |          |    |
|---|----------|---------------------------------|----------|----|
| 5 | 1.5 mol% | Na <sub>2</sub> CO <sub>3</sub> | MeOH/DMF | 79 |
| 6 | 2 mol%   | Na <sub>2</sub> CO <sub>3</sub> | MeOH/DMF | 81 |
| 7 | 2.5 mol% | Na <sub>2</sub> CO <sub>3</sub> | MeOH/DMF | 80 |

**Table S3.** Optimization of the reaction conditions for the second step.

General reaction conditions: **1a** (0.2 mmol), **2a** (0.4 mmol), and MeOH (1 mL) were added at 60 °C for 30 minutes. **3a** (0.5 mmol), base (0.3 mmol), photocatalyst (x mol%) were added, using using 2 mL of the solvent and 3W blue LED at 15 °C for 48 h, yields of isolated product.

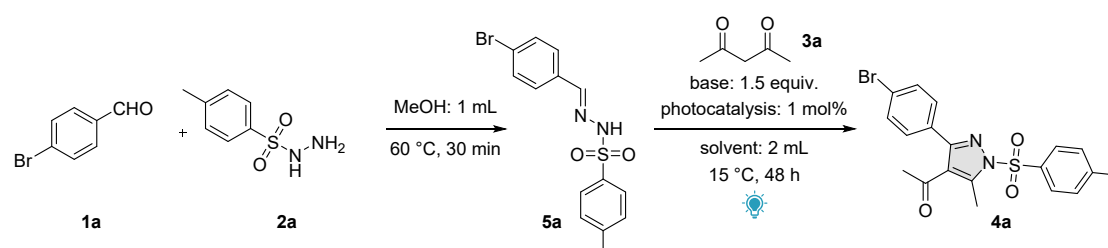

| Entry | Photocatalysis                                          | Base                            | Solvents | Yield (%) |
|-------|---------------------------------------------------------|---------------------------------|----------|-----------|
| 1     | 4CzIPN                                                  | Na <sub>2</sub> CO <sub>3</sub> | MeOH/DMF | 78        |
| 2     | Rhodamine 6G                                            | Na <sub>2</sub> CO <sub>3</sub> | MeOH/DMF | 67        |
| 3     | Ru(bpy) <sub>3</sub> Cl <sub>2</sub> ·6H <sub>2</sub> O | Na <sub>2</sub> CO <sub>3</sub> | MeOH/DMF | 69        |
| 4     | Rhodamine B                                             | Na <sub>2</sub> CO <sub>3</sub> | MeOH/DMF | 17        |
| 5     | Thioxanthone                                            | Na <sub>2</sub> CO <sub>3</sub> | MeOH/DMF | 5         |

**Table S4.** Optimization of the reaction conditions for the second step.

General reaction conditions: **1a** (0.2 mmol), **2a** (0.4 mmol), and MeOH (1 mL) were added at 60 °C for 30 minutes. **3a** (0.5 mmol), base (0.3 mmol), photocatalyst (1 mol%) were added, using using 2 mL of the solvent and 3W blue LED at 15 °C for 48 h, yields of isolated product.

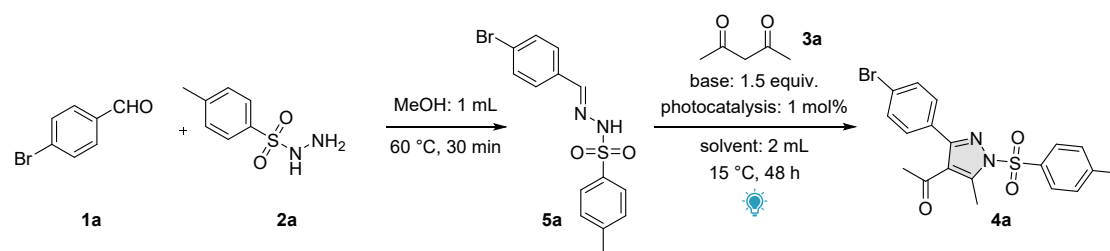

| Entry | Photocatalysis | Base                            | Solvents | Yield (%) |
|-------|----------------|---------------------------------|----------|-----------|
| 1     | Rose Bengal    | Li <sub>2</sub> CO <sub>3</sub> | MeOH/DMF | 28        |
| 2     | Rose Bengal    | LiOH                            | MeOH/DMF | 35        |
| 3     | Rose Bengal    | Cs <sub>2</sub> CO <sub>3</sub> | MeOH/DMF | 73        |
| 4     | Rose Bengal    | Mg(OH) <sub>2</sub>             | MeOH/DMF | <5        |
| 5     | Rose Bengal    | NaOH                            | MeOH/DMF | 46        |

**Table S5.** Optimization of the reaction conditions for the second step.

General reaction conditions: **1a** (0.2 mmol), **2a** (0.4 mmol), and MeOH (1 mL) were added at 60 °C for 30 minutes. **3a** (0.5 mmol), base (0.3 mmol), photocatalyst (1 mol%) were added, using 2 mL of the solvent and 3W blue LED at 15 °C for 48 h, yields of isolated product.

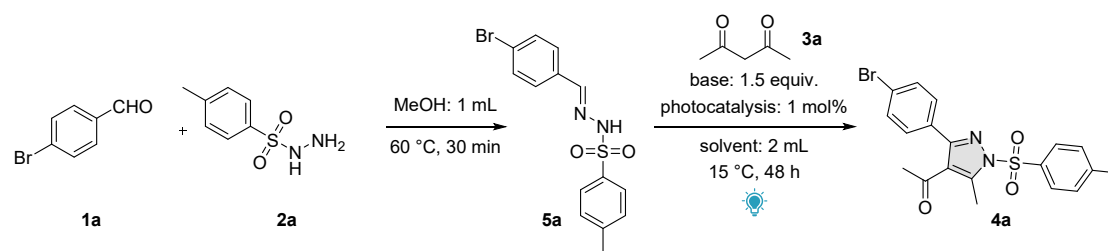

| Entry | LEDs            | Photocatalysis | Base                            | Solvents | Yield (%) |
|-------|-----------------|----------------|---------------------------------|----------|-----------|
| 1     | Blue LED: 24 W  | Rose Bengal    | Na <sub>2</sub> CO <sub>3</sub> | MeOH/DMF | 81        |
| 2     | Blue LED: 40 W  | Rose Bengal    | Na <sub>2</sub> CO <sub>3</sub> | MeOH/DMF | 80        |
| 3     | Blue LED: 60 W  | Rose Bengal    | Na <sub>2</sub> CO <sub>3</sub> | MeOH/DMF | 80        |
| 4     | Green LED: 3 W  | Rose Bengal    | Na <sub>2</sub> CO <sub>3</sub> | MeOH/DMF | 76        |
| 5     | Yellow LED: 3 W | Rose Bengal    | Na <sub>2</sub> CO <sub>3</sub> | MeOH/DMF | 60        |

**Table S6.** Optimization of the reaction conditions for the second step.

General reaction conditions: **1a** (0.2 mmol), **2a** (0.4 mmol), and MeOH (1 mL) were added at 60 °C for 30 minutes. **3a** (0.5 mmol), base (0.3 mmol), photocatalyst (1 mol%) were added, using using 2 mL of the solvent and blue LED at 15 °C for 48 h, yields of isolated product.

## 4. Control experiments

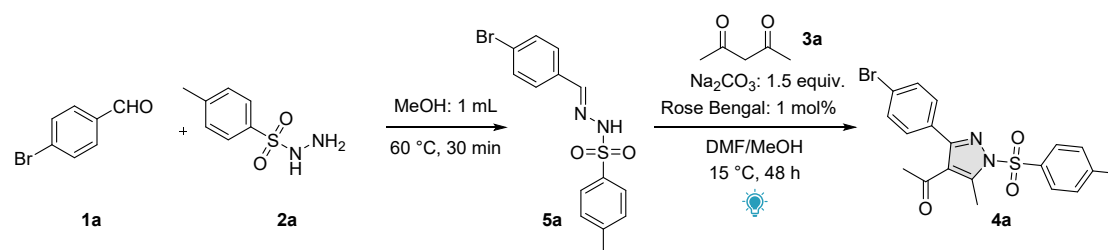

| Entry | Controlled parameter  | Yield (%) |
|-------|-----------------------|-----------|
| 1     | Standard conditions   | 82        |
| 2     | Without photocatalyst | 0         |
| 3     | Without light         | 0         |
| 4     | Without base          | 0         |
| 5     | Argon protects        | 0         |

**Table S7.** Optimization of the reaction conditions for the second step.

General reaction conditions: **1a** (0.2 mmol), **2a** (0.4 mmol), and MeOH (1 mL) were added at 60 °C for 30 minutes. **3a** (0.5 mmol), base (0.3 mmol), photocatalyst (1 mol%) were added, using 2 mL of the solvent and 3W blue LED at 15 °C for 48 h, yields of isolated product.

## 5. Mechanistic investigations

### 5.1 Ultraviolet visible absorption experiments

Ultraviolet-visible absorption experiments were performed using a UV-vis near-infrared spectrophotometer (UV3600). The samples were measured in 1.0 cm quartz cuvettes.

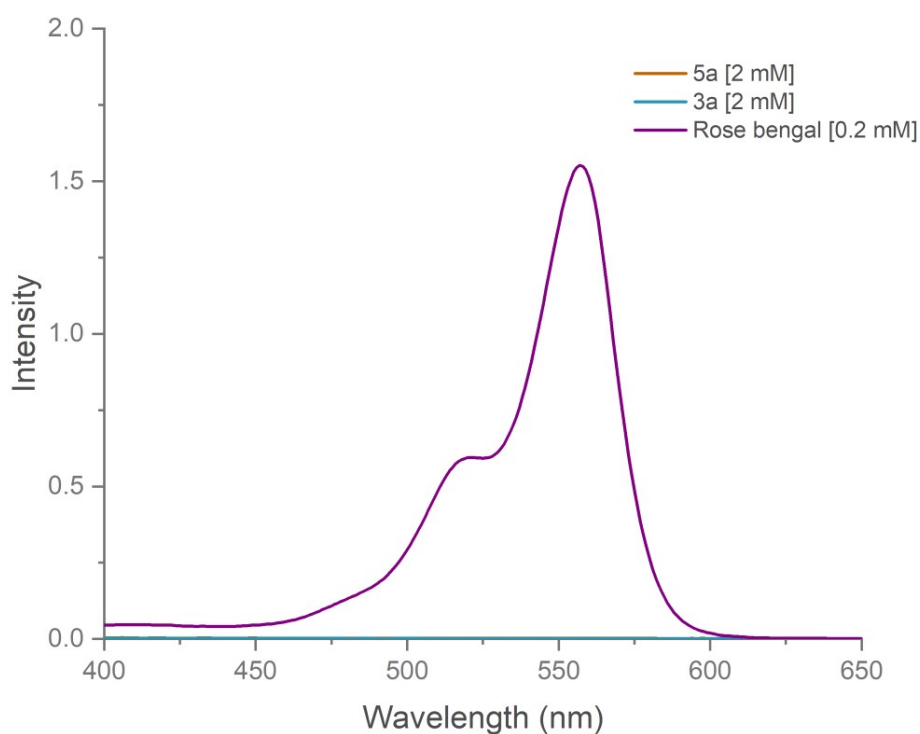

**Figure S1:** Ultraviolet-visible absorption experiments

The concentration of **3a** and **5a** were  $2 \times 10^{-3}$  M and the concentration of Rose Bengal was  $2 \times 10^{-4}$  M.

The solvent was an equal volume of DMF and MeOH.

## 5.2 Stern Volmer quenching

Stern-Volmer luminescence quenching studies were performed using a FLS 980 spectrofluorometer using fluorescence quartz cuvettes. In each experiment, the following parameters were set: the excitation wavelength  $\lambda_{\text{ex}} = 521 \text{ nm}$ , the luminescence was measured over a range of 541nm-751 nm ( $\lambda_{\text{max}} = 581 \text{ nm}$ ). The ratio of  $I_0/I$  was plotted as a function of the quencher concentration ( $I_0$  = emission intensity of the photocatalyst (Rose Bengal) in isolation at the specified wavelength 521 nm;  $I$  = observed emission intensity of the photocatalyst (Rose Bengal) with added quencher).

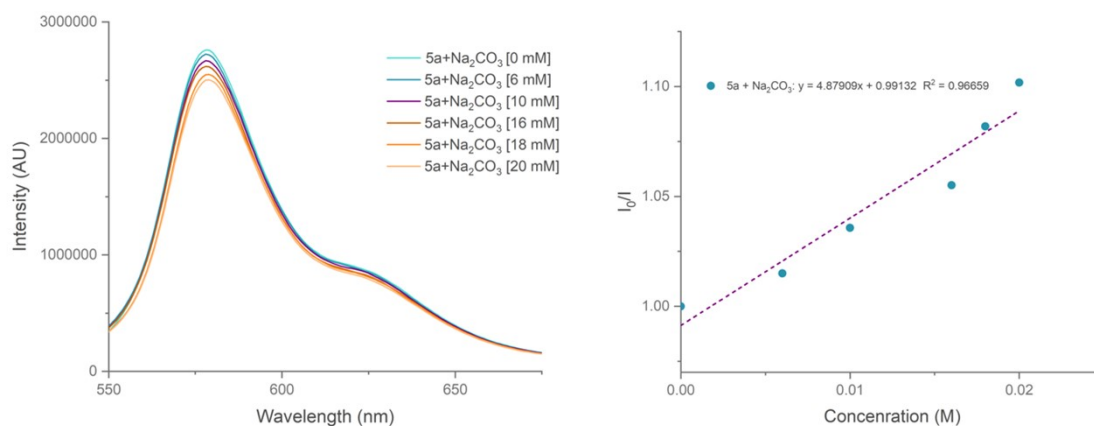

**Figure S2:** Stern-Volmer luminescence quenching studies

Using Rose Bengal as photocatalyst, **5a** and Na<sub>2</sub>CO<sub>3</sub> as quencher can quench the fluorescence of the excited photocatalyst in an equal volume of DMF and MeOH.

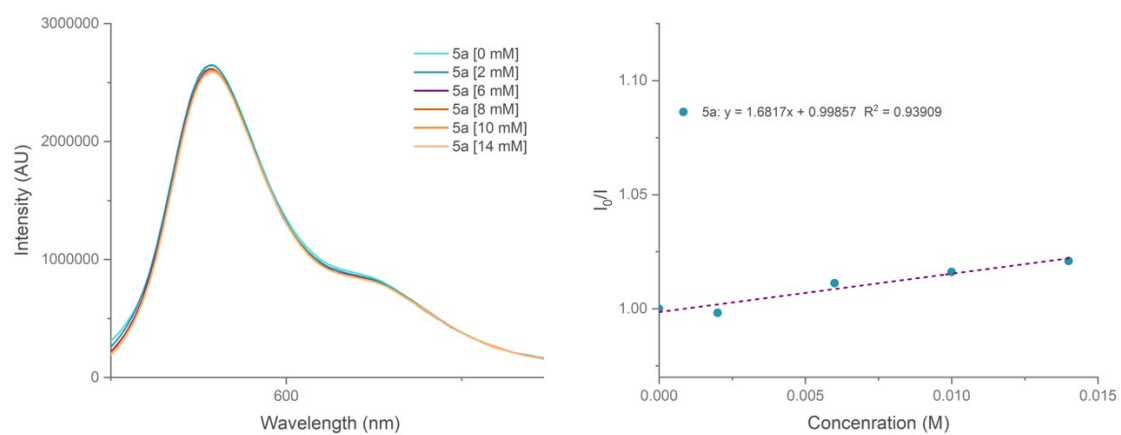

**Figure S3:** Stern-Volmer luminescence quenching studies

Using Rose Bengal as photocatalyst, **5a** as quencher can't quench the fluorescence of the excited photocatalyst in an equal volume of DMF and MeOH.

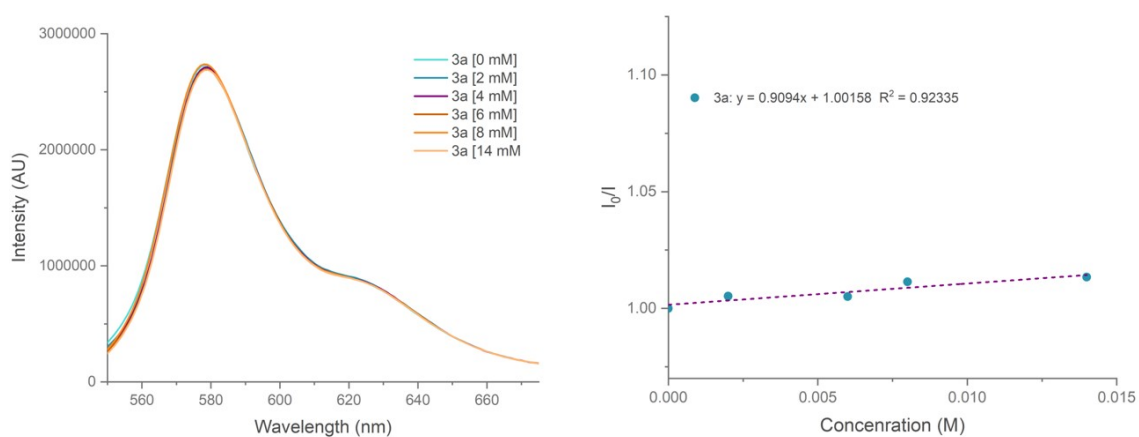

**Figure S4:** Stern-Volmer luminescence quenching studies

Using Rose Bengal as photocatalyst, **3a** as quencher can't quench the fluorescence of the excited photocatalyst in an equal volume of DMF and MeOH.

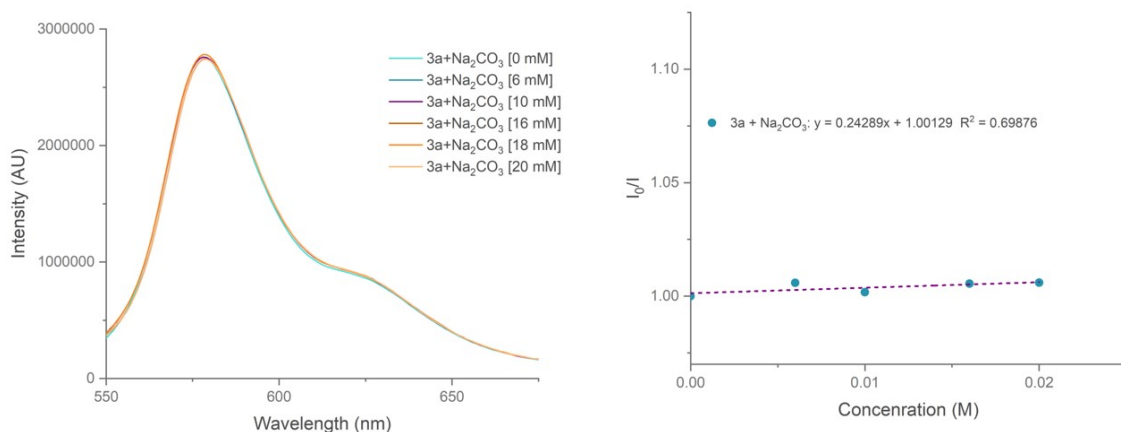

**Figure S5:** Stern-Volmer luminescence quenching studies

Using Rose Bengal as photocatalyst, **3a** and Na<sub>2</sub>CO<sub>3</sub> as quencher can't quench the fluorescence of the excited photocatalyst in an equal volume of DMF and MeOH.

### 5.3 Radical quenching experiment

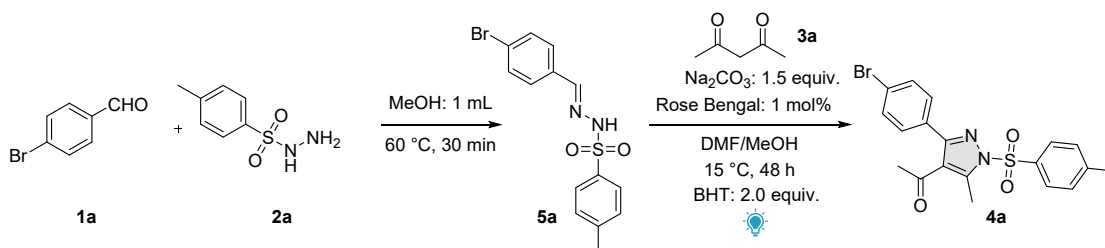

**Figure S6:** Radical quenching experiment with BHT

The first step was to add 4-bromobenzaldehyde **1a** (0.2 mmol), 4-methylbenzenesulfonylhydrazide **2a** (0.4 mmol) and methanol (1 mL) to the reaction tube with magnetic stirring bar, stirring for 30 minutes at 60 °C, then add acetylacetone **3a** (0.5 mmol), sodium carbonate (0.3 mmol), Rose Bengal (1 mol%), butylated hydroxytoluene (BHT) (0.4 mmol), *N,N*-dimethylformamide (1 mL), irradiation with 3W blue LED lamp for 48 hours. The desired products **4a** was afforded in 73 % yield.



## 5.4 Triplet quenching experiment

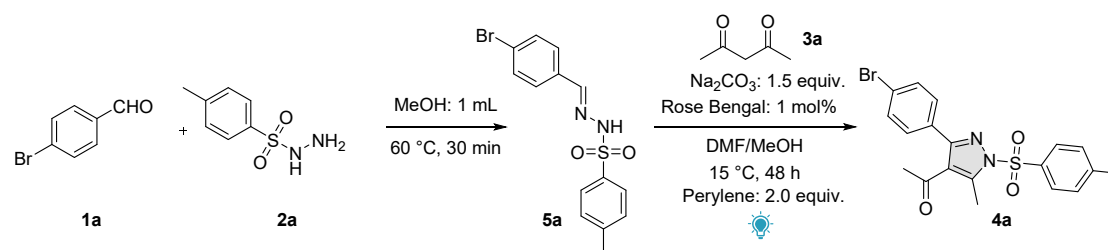

**Figure S7:** Triplet quenching experiment with perylene

The first step is to add 4-Bromobenzaldehyde **1a** (0.2 mmol), 4-Methylbenzenesulfonylhydrazide **2a** (0.4 mmol) and methanol (1 mL) to the reaction tube with magnetic stirring bar, stirring for 30 minutes at 60 °C, then add acetylacetone **3a** (0.5 mmol), sodium carbonate (0.3 mmol), Rose Bengal (1 mol%), perylene (0.4 mmol), *N,N*-dimethylformamide (1 mL), irradiation with 3W blue LED lamp for 48 hours. The desired products **4a** was afford in 29 % yield.

## 5.5 Replace the photocatalyst for the mechanism study

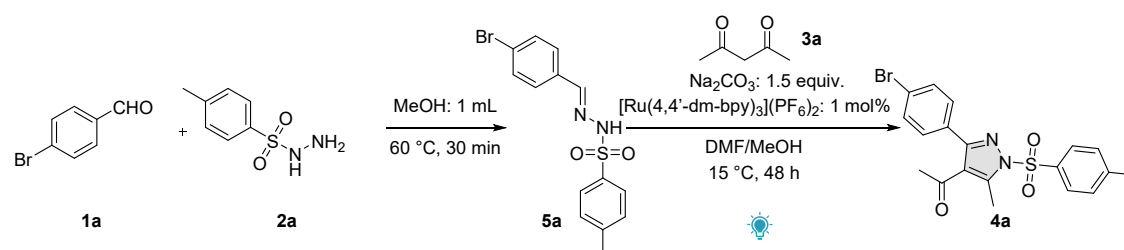

**Figure S8:** Replace the photocatalyst as  $[\text{Ru}(4,4'\text{-dm-bpy})_3](\text{PF}_6)_2$  for the mechanism study

The first step is to add 4-Bromobenzaldehyde **1a** (0.2 mmol), 4-Methylbenzenesulfonylhydrazide **2a** (0.4 mmol) and methanol (1 mL) to the reaction tube with magnetic stirring bar, stirring for 30 minutes at 60 °C, then add acetylacetone **3a** (0.5 mmol), sodium carbonate (0.3 mmol),  $[\text{Ru}(4,4'\text{-dm-bpy})_3](\text{PF}_6)_2$  (1 mol%), *N,N*-dimethylformamide (1 mL), irradiation with 3W blue LED lamp for 48 hours. The desired products **4a** was afford in 73 % yield.

## 5.6 Cyclic voltammetry (CV) measurements

Linear scan voltammetry measurements were performed on a photoelectrochemical analysis CHI760E electrical workstation (Shanghai Chenhua) using a three-electrode cell set-up: tetrabutylammonium hexafluorophosphate ( $[(n\text{-Bu})_4\text{N}]\text{PF}_6$ ) (0.1 M) was used as the supporting electrolyte, the working electrode is a glassy carbon, the counter electrode is a Pt wire and the reference electrode is Ag/AgCl.

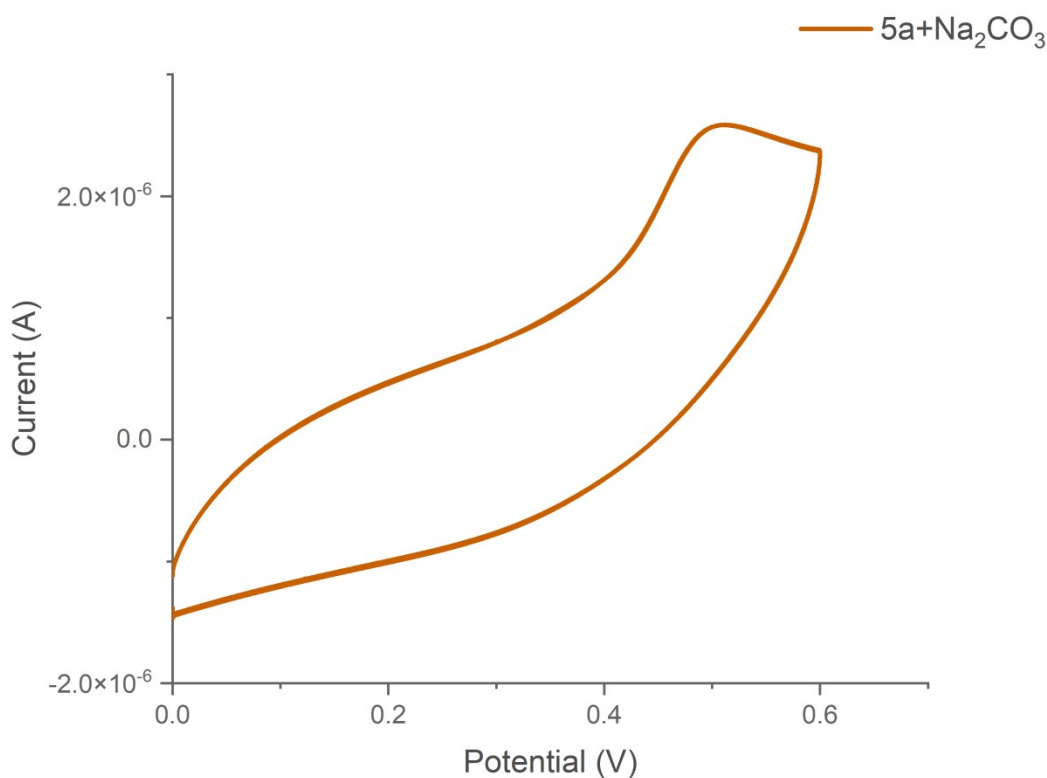

**Figure S9:** Cyclic voltammetry (CV) measurements

Cyclic voltammetry of [**5a** +  $\text{Na}_2\text{CO}_3$ ] (0.1 mM) in an equal volume of DMF and MeOH. The scan rate was 10 mV/s. It shows an oxidation at  $E_{1/2} = 0.46$  V vs SCE.

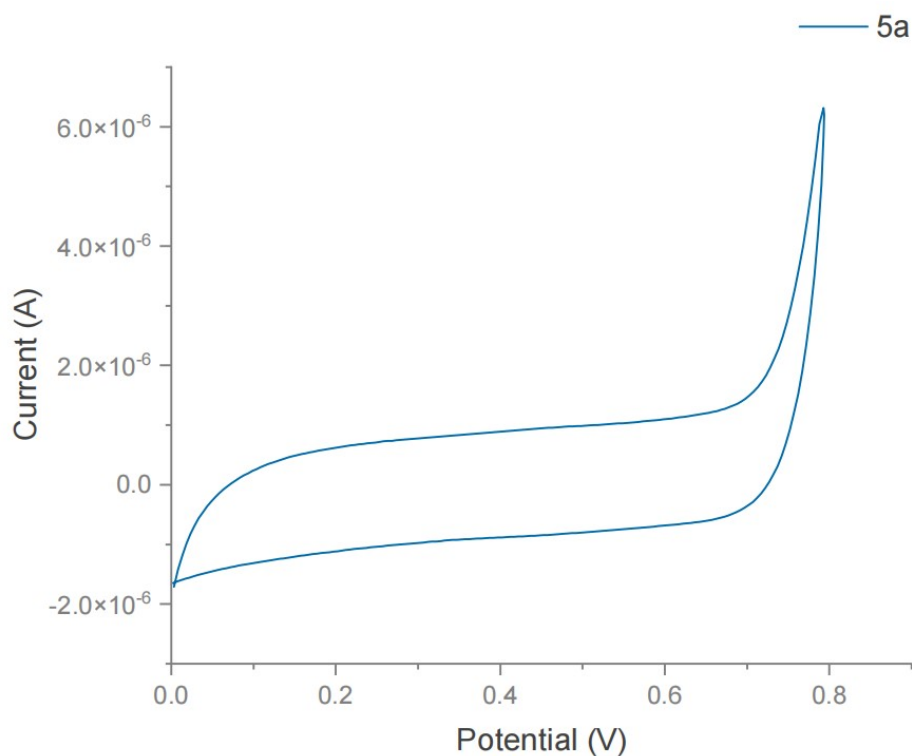

**Figure S10:** Cyclic voltammetry (CV) measurements

Cyclic voltammetry of **5a** (0.1 mM) in an equal volume of DMF and MeOH. The scan rate was 10 mV/s. It shows an oxidation at  $E_{1/2} = 0.74$  V vs SCE.

## 5.7 Singlet oxygen trapping experiment

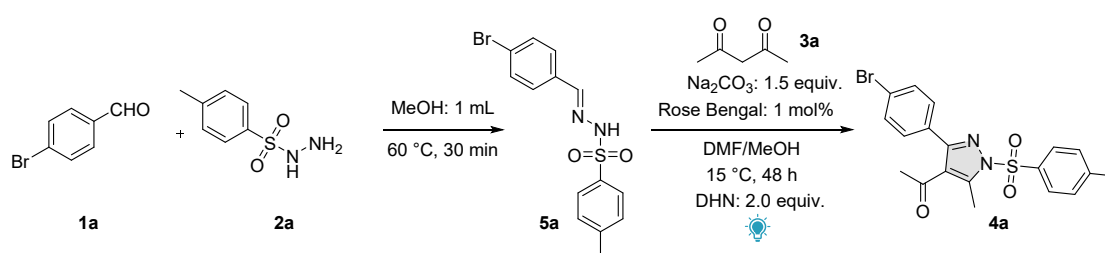

**Figure S11:** Singlet oxygen trapping with DHN

The first step is to add 4-Bromobenzaldehyde **1a** (0.2 mmol), 4-Methylbenzenesulfonylhydrazide **2a** (0.4 mmol) and methanol (1 mL) to the reaction tube with magnetic stirring bar, stirring for 30 minutes at 60 °C, then add acetylacetone **3a** (0.5 mmol), sodium carbonate (0.3 mmol), Rose Bengal (1 mol%), 1,5-Dihydroxy naphthalene (DHN) (0.4 mmol), *N,N*-dimethylformamide (1 mL), irradiation with 3W blue LED lamp for 48 hours. After confirming the finish of the reaction by TLC, the target point was found to be completely inhibited.

## 5.8 Replace the acetylacetone for the mechanism study

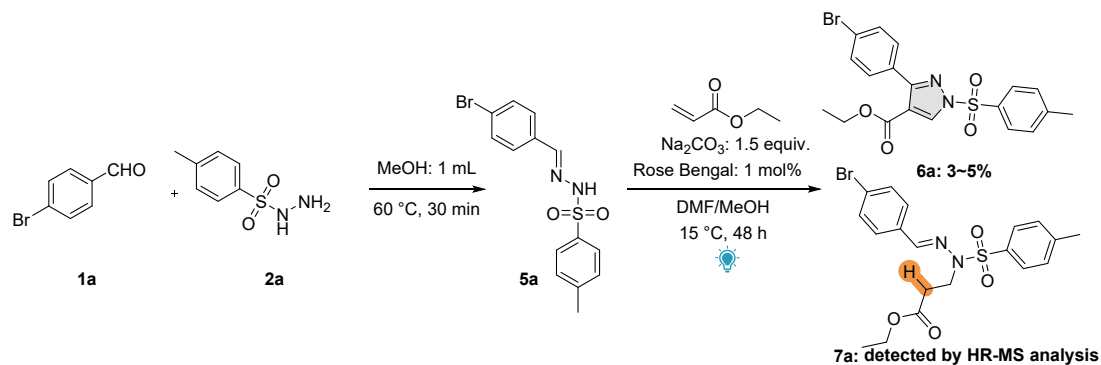

**Figure S12:** Replace the acetylacetone as ethyl acrylate for the mechanism study

The first step is to add 4-Bromobenzaldehyde **1a** (0.2 mmol), 4-Methylbenzenesulfonylhydrazide **2a** (0.4 mmol) and methanol (1 mL) to the reaction tube with magnetic stirring bar, stirring for 30 minutes at 60 °C, then add ethyl acrylate (0.5 mmol), sodium carbonate (0.3 mmol), Rose Bengal (1 mol%), *N,N*-dimethylformamide (1 mL), irradiation with 3W blue LED lamp for 48 hours.

### ethyl 3-(4-bromophenyl)-1-tosyl-1H-pyrazole-4-carboxylate (**6a**)

<sup>1</sup>H NMR (400 MHz, DMSO-*d*<sub>6</sub>) δ 9.0 (s, 1H), 8.0 (d, *J* = 8.5 Hz, 2H), 7.6 (q, *J* = 8.7 Hz, 4H), 7.5 (d, *J* = 7.8 Hz, 2H), 4.2 (q, *J* = 7.1 Hz, 2H), 2.4 (s, 3H), 1.2 (t, *J* = 7.1 Hz, 3H).

<sup>13</sup>C NMR (100 MHz, DMSO-*d*<sub>6</sub>) δ 161.2, 154.6, 147.2, 137.4, 132.3, 131.2, 131.1, 130.7, 129.5, 128.4, 123.1, 114.7, 60.8, 21.3, 14.0.

HRMS (ESI-TOF): Anal Calcd. For. C<sub>19</sub>H<sub>17</sub><sup>79</sup>BrN<sub>2</sub>O<sub>4</sub>S [M+H]<sup>+</sup>: 449.0166, Found: 449.0159. Anal Calcd. For. C<sub>19</sub>H<sub>17</sub><sup>81</sup>BrN<sub>2</sub>O<sub>4</sub>S [M+H]<sup>+</sup>: 451.0145, Found: 451.0117.

IR (neat, cm<sup>-1</sup>): ν 2975, 1715, 1456, 1312, 1127, 1083, 1003, 835, 671, 667.

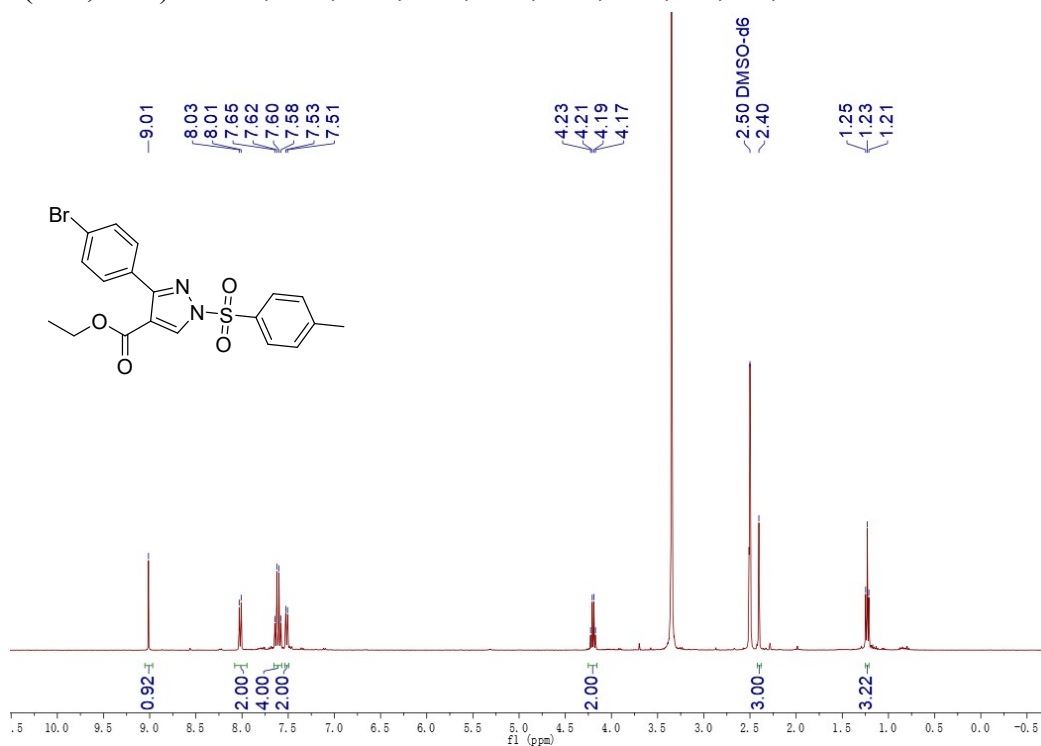



|                                             |                                                   |
|---------------------------------------------|---------------------------------------------------|
| Formula weight                              | 461.36                                            |
| Temperature/K                               | 223                                               |
| Crystal system                              | triclinic                                         |
| Space group                                 | P -1                                              |
| a/Å                                         | 7.8985(5)                                         |
| b/Å                                         | 8.7692(8)                                         |
| c/Å                                         | 16.0272(7)                                        |
| $\alpha$ /°                                 | 81.403(6)                                         |
| $\beta$ /°                                  | 81.187(5)                                         |
| $\gamma$ /°                                 | 73.244(7)                                         |
| Volume/Å <sup>3</sup>                       | 1043.89(13)                                       |
| Z                                           | 2                                                 |
| $\rho_{\text{calc}}/\text{g}/\text{cm}^3$   | 1.468                                             |
| $\mu/\text{mm}^{-1}$                        | 2.093                                             |
| F(000)                                      | 472.0                                             |
| Crystal size/mm <sup>3</sup>                | 0.40 × 0.30 × 0.20                                |
| Radiation                                   | MoK $\alpha$ ( $\lambda = 0.71073$ )              |
| 2 $\theta$ range for data collection/°      | 2.4140 to 29.1690                                 |
| Index ranges                                | -11 ≤ h ≤ 11, -12 ≤ k ≤ 11, -19 ≤ l ≤ 22          |
| Reflections collected                       | 12614                                             |
| Data/restraints/parameters                  | 5519/0/256                                        |
| Goodness-of-fit on F <sup>2</sup>           | 1.019                                             |
| Final R indexes ( $I \geq 2\sigma(I)$ )     | R <sub>1</sub> = 0.0523, wR <sub>2</sub> = 0.1134 |
| Final R indexes (all data)                  | R <sub>1</sub> = 0.0936, wR <sub>2</sub> = 0.1394 |
| Largest diff. peak/hole / e Å <sup>-3</sup> | 0.370/-0.614                                      |

## 7. DFT calculation

### 7.1 DFT computational details

All DFT calculations were performed with the Gaussian 16 software package.<sup>[1]</sup> All geometry optimizations of intermediates and transition states were achieved using M06-2X functional and def2-SVP basis set in the gas phase. Frequency calculations were also conducted at the same level of theory to obtain vibration frequencies to determine the identity of stationary points as an intermediate or transition state, and obtaining the zero-point energy (ZPE) and thermal corrections at 298 K. IRC (intrinsic reaction coordinates) analysis was also performed at the same level of theory as geometry optimization to verify the proposed process. The single-point

energies and solvent effects were computed at the same level of theory as geometry optimization with the def2-TZVP basis set. Since the optimal reaction condition is the use of a mixed solvent, two parameters under the mixed solvent are defined by volume ratio: dynamic dielectric constant ( $\epsilon_{\text{ps}}=35.6$ ) and static dielectric constant ( $\epsilon_{\text{psinf}}=1.9$ ). Solvation energies were evaluated by a self-consistent reaction field (SCRF) using the SMD model. All structural figures were generated with CYL view.<sup>[2]</sup> The searching for minimal energy crossing points (MECPs) was conducted using a modified version of Harvey's code (sobMECP<sup>[3]</sup>) interfaced with Gaussian 16. The electron density distribution of the triplet structure obtained by Multiwfn software<sup>[4]</sup>, as visualized by the VMD program<sup>[5]</sup>.

## 7.2 DFT calculation for the intramolecular 1, 3-hydrogen migration of the Int3

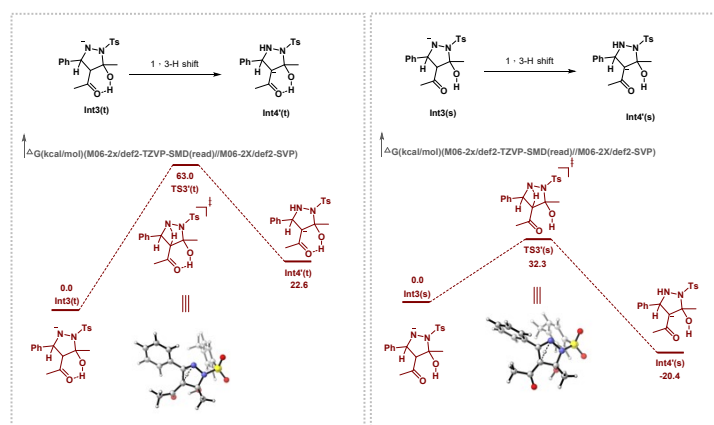

Figure S14: DFT calculations.

Calculated free Gibbs energies [SMD/M06-2x/def2-tzvp] are given in kcal/mol.

## 7.3 DFT calculation for the triplet excitation energies for the Int1'

1. Geometry optimizations of **Int1'** were achieved using def2-SVP basis set in the gas phase. Frequency calculations were also conducted at the same level of theory to obtain vibrational frequencies to determine the identity of stationary points as an intermediate, and obtaining the zero-point energy (ZPE) and thermal corrections at

298 K. The single-point energies and solvent effects were computed at the same level of theory as geometry optimization with the def2-TZVP basis set. Since the optimal reaction condition is the use of a mixed solvent, two parameters under the mixed solvent are defined by volume ratio: dynamic dielectric constant ( $\epsilon_s=35.6$ ) and static dielectric constant ( $\epsilon_{\infty}=1.9$ ). Solvation energies were evaluated by a self-consistent reaction field (SCRF) using the SMD model.

| Entry | Functional | Triplet energy (kcal/mol) |
|-------|------------|---------------------------|
| 1     | B3LYP-D3   | 42.4                      |
| 2     | WB97XD     | 42.5                      |
| 3     | M06-2X     | 46.0                      |

**Table S8:** DFT-computed triplet excitation energies for the **Int1'**

2. Geometry optimizations of **Int1'** were achieved using 6-311g(d,p) basis set in the gas phase. Frequency calculations were also conducted at the same level of theory to obtain vibrational frequencies to determine the identity of stationary points as an intermediate, and obtaining the zero-point energy (ZPE) and thermal corrections at 298 K. The single-point energies and solvent effects were computed at the same level of theory as geometry optimization with the 6-311+g\*\* basis set. Since the optimal reaction condition is the use of a mixed solvent, two parameters under the mixed solvent are defined by volume ratio: dynamic dielectric constant ( $\epsilon_s=35.6$ ) and static dielectric constant ( $\epsilon_{\infty}=1.9$ ). Solvation energies were evaluated by a self-consistent reaction field (SCRF) using the SMD model.

| Entry | Functional | Triplet energy (kcal/mol) |
|-------|------------|---------------------------|
| 1     | B3LYP-D3   | 40.9                      |
| 2     | WB97XD     | 42.5                      |
| 3     | M06-2X     | 46.1                      |



**Table S9:** DFT-computed triplet excitation energies for the **Int1'**

## 7.4 Calculated Minimum Energy Crossing Points

$\Delta E$  is computed at the M06-2X/def2-SVP level.

| Name           | E / Hartree    | $\Delta E$ / kcal mol <sup>-1</sup> |
|----------------|----------------|-------------------------------------|
| <b>Int3(T)</b> | -1543.67780007 | /                                   |
| MECP           | -1543.67711716 | 0.42(8)                             |

**Table S10:** Calculated Energies of MECPs.

## 7.5 The electron density distribution of the triplet structure

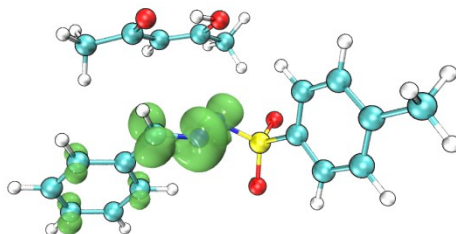

**Figure S14:** The electron density distribution of the **Int1(T)**. C (cyan); N (blue); O (red); S (yellow); H (white). The isovalue is 0.01 au. (green, positive)

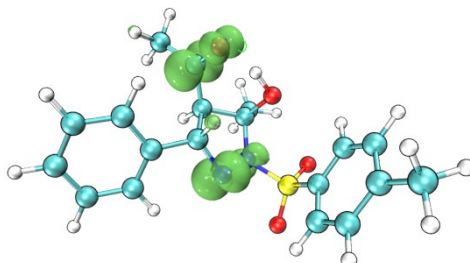

**Figure S15:** The electron density distribution of the **Int3(T)**. C (cyan); N (blue); O (red); S (yellow); H (white). The isovalue is 0.01 au. (green, positive)

## 7.6 DFT calculations for SET process

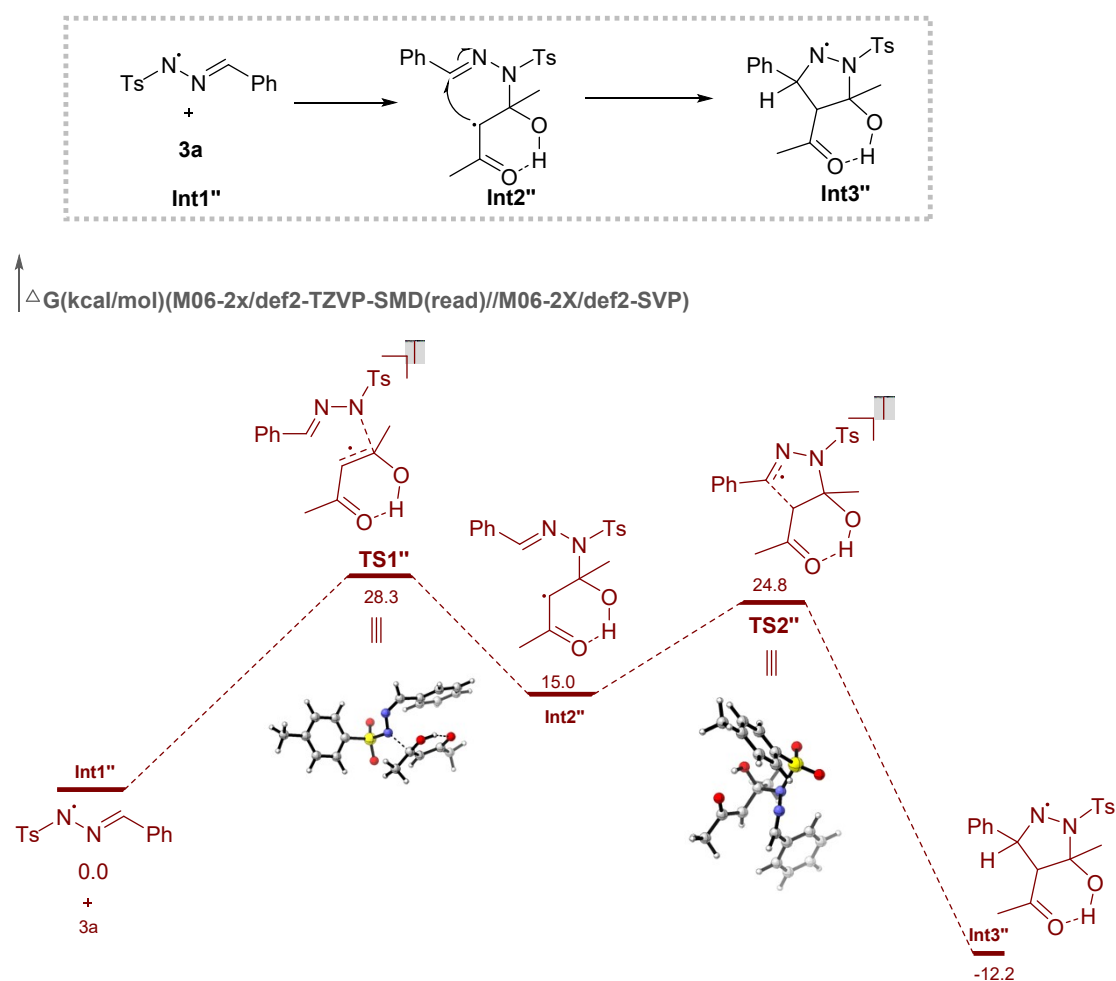

**Figure S16:** DFT calculations for SET process. The energy barrier increases to 28.3 kcal/mol for the formation of the Int2'', which is clearly unfavorable for this transformation.

## 7.7 Cartesian Coordinates for the Optimized Structures

### Int1'(S)

|   |             |             |             |
|---|-------------|-------------|-------------|
| C | -1.94976400 | -1.06602900 | -0.85802100 |
| N | -0.84366100 | -1.15760200 | -0.19515900 |
| N | 0.08652800  | -1.97294200 | -0.66293500 |
| C | -3.02184900 | -0.18191500 | -0.41689900 |
| C | -2.91307800 | 0.59152200  | 0.75798300  |

|   |             |             |             |
|---|-------------|-------------|-------------|
| C | -4.21129800 | -0.07449700 | -1.16040000 |
| C | -3.94559700 | 1.42872700  | 1.15883800  |
| H | -1.99319700 | 0.50371600  | 1.33753500  |
| C | -5.24527700 | 0.76698100  | -0.75475500 |
| H | -4.31586300 | -0.66658100 | -2.07319700 |
| C | -5.12272700 | 1.52714700  | 0.40782700  |
| H | -3.83595100 | 2.01604900  | 2.07376600  |
| H | -6.15693400 | 0.82919000  | -1.35401000 |
| H | -5.93161900 | 2.18671800  | 0.72766400  |
| S | 1.39521500  | -1.97163000 | 0.31931700  |
| O | 1.07658400  | -2.09169200 | 1.74451600  |
| O | 2.36513500  | -2.89518600 | -0.26757900 |
| C | 2.10773200  | -0.32463900 | 0.14615200  |
| C | 3.08315500  | -0.09522000 | -0.81861900 |
| C | 1.64486000  | 0.71699900  | 0.94899100  |
| C | 3.59504700  | 1.19125500  | -0.98457600 |
| H | 3.43184500  | -0.93931900 | -1.41610700 |
| C | 2.15891800  | 1.99805600  | 0.76914200  |
| H | 0.89569500  | 0.49522700  | 1.71028500  |
| C | 3.13715000  | 2.25558900  | -0.20053900 |
| H | 4.36810300  | 1.37446800  | -1.73579100 |
| H | 1.79819000  | 2.81849400  | 1.39561300  |
| C | 3.66399800  | 3.65390700  | -0.40224400 |
| H | 4.59907800  | 3.64816600  | -0.97919000 |
| H | 2.93698500  | 4.27387800  | -0.95045800 |
| H | 3.85690800  | 4.15063100  | 0.55984900  |
| H | -2.09812300 | -1.66303800 | -1.77114100 |

Thermal correction to Gibbs Free Energy= 0.199325

Esolv(RM062X) = -1199.52500492

**Int1'(T)**

|   |             |             |             |
|---|-------------|-------------|-------------|
| C | 1.78331500  | -1.08203600 | -0.94434700 |
| N | 0.68571500  | -0.39524600 | -0.54107900 |
| N | 0.36462300  | 0.79248900  | -1.03850100 |
| C | 3.07527700  | -0.81916900 | -0.41171100 |
| C | 3.27577800  | 0.24049600  | 0.51919600  |
| C | 4.21137700  | -1.58478800 | -0.79008500 |
| C | 4.54024300  | 0.50732600  | 1.01958000  |
| H | 2.40740400  | 0.82892300  | 0.82417700  |
| C | 5.46939900  | -1.30186300 | -0.27993300 |
| H | 4.07955800  | -2.40458800 | -1.50160600 |
| C | 5.65259000  | -0.25299900 | 0.63021300  |
| H | 4.66776100  | 1.32609300  | 1.73208100  |
| H | 6.32555600  | -1.90564100 | -0.59255500 |
| H | 6.64407300  | -0.03278100 | 1.03001200  |
| S | -0.68443000 | 1.56571200  | -0.02899000 |
| O | -0.16818700 | 1.66440400  | 1.34053500  |
| O | -1.12030900 | 2.78361200  | -0.70838600 |
| C | -2.12814800 | 0.49937000  | 0.08593800  |
| C | -3.24755900 | 0.78107000  | -0.68779700 |
| C | -2.09862200 | -0.61821600 | 0.92141800  |
| C | -4.35484000 | -0.06601700 | -0.62450300 |
| H | -3.23206900 | 1.66920700  | -1.32167700 |
| C | -3.20627500 | -1.45838100 | 0.96793600  |
| H | -1.20450900 | -0.80504500 | 1.51677100  |
| C | -4.34861600 | -1.19624700 | 0.19796300  |
| H | -5.24165000 | 0.15501600  | -1.22427900 |
| H | -3.19016700 | -2.33794900 | 1.61736000  |
| C | -5.53521900 | -2.12450700 | 0.25919800  |
| H | -6.37844000 | -1.73212800 | -0.32533900 |

|   |             |             |             |
|---|-------------|-------------|-------------|
| H | -5.28046600 | -3.11833100 | -0.14035400 |
| H | -5.87540900 | -2.26747900 | 1.29586900  |
| H | 1.65263900  | -1.93575100 | -1.62515100 |

Thermal correction to Gibbs Free Energy= 0.195024

Esolv(UM062X) = -1199.44739377

**TS1(S)**

|   |             |             |             |
|---|-------------|-------------|-------------|
| C | -1.15292900 | 0.72407700  | -0.65735100 |
| N | -0.20523100 | -0.02596400 | -0.23885600 |
| N | -0.25467500 | -1.35394300 | -0.46661500 |
| C | -1.13837300 | 2.16701600  | -0.37925500 |
| C | -0.00451400 | 2.83163500  | 0.11385300  |
| C | -2.31481200 | 2.89791900  | -0.60157900 |
| C | -0.05011000 | 4.19778600  | 0.37037200  |
| H | 0.90312100  | 2.24862100  | 0.28400000  |
| C | -2.35655100 | 4.26641400  | -0.33788600 |
| H | -3.19670600 | 2.35912100  | -0.96135300 |
| C | -1.22466000 | 4.92274700  | 0.14539200  |
| H | 0.83860200  | 4.70763000  | 0.74921200  |
| H | -3.28016000 | 4.82362000  | -0.50832400 |
| H | -1.25552000 | 5.99505400  | 0.34887900  |
| S | 0.98231100  | -2.06964500 | 0.42243600  |
| O | 0.69226100  | -2.10283400 | 1.85644700  |
| O | 1.35985700  | -3.31550100 | -0.23753900 |
| C | 2.35564000  | -0.93899700 | 0.20333300  |
| C | 3.13698200  | -1.05189100 | -0.93882700 |
| C | 2.64210600  | 0.00312400  | 1.18681100  |
| C | 4.21814800  | -0.18695600 | -1.10690900 |
| H | 2.89064200  | -1.81652100 | -1.67701000 |
| C | 3.72480800  | 0.85725200  | 1.00663300  |

|   |             |             |             |
|---|-------------|-------------|-------------|
| H | 2.00503900  | 0.04914900  | 2.07104400  |
| C | 4.52329900  | 0.77940500  | -0.14367100 |
| H | 4.83864900  | -0.26526200 | -2.00276300 |
| H | 3.95737900  | 1.60393100  | 1.77031700  |
| C | 5.67322800  | 1.73436900  | -0.33622800 |
| H | 6.32435100  | 1.41361000  | -1.16033600 |
| H | 5.30586300  | 2.74525800  | -0.57174900 |
| H | 6.28326700  | 1.81133600  | 0.57544300  |
| H | -2.01503700 | 0.35057000  | -1.21422200 |
| C | -2.63297900 | -1.48509800 | 0.64990100  |
| C | -1.54805700 | -3.60165000 | -0.21632700 |
| H | -1.08459800 | -3.76957300 | 0.76404600  |
| H | -2.50027500 | -4.14923100 | -0.26244000 |
| H | -0.87738600 | -3.95755100 | -1.00597700 |
| C | -4.42751600 | 0.04318900  | 1.50439600  |
| H | -5.50816300 | -0.10891900 | 1.36434700  |
| H | -4.12129300 | -0.32939000 | 2.49046400  |
| H | -4.24163100 | 1.12800700  | 1.45587400  |
| C | -3.68052100 | -0.62734400 | 0.36996400  |
| C | -1.90211200 | -2.14530600 | -0.43342900 |
| O | -4.06900700 | -0.32852100 | -0.81689800 |
| O | -2.40013900 | -1.93665400 | -1.65985600 |
| H | -3.15783500 | -1.24154500 | -1.53605800 |
| H | -2.31618200 | -1.68231700 | 1.67352500  |

Thermal correction to Gibbs Free Energy= 0.314614

Esolv(RM062X) = -1545.29636684

### TS1(T)

|   |            |             |             |
|---|------------|-------------|-------------|
| C | 1.69488200 | 0.26144700  | -1.20345800 |
| N | 0.59313900 | -0.38096500 | -0.69734800 |

|   |             |             |             |
|---|-------------|-------------|-------------|
| N | 0.31268700  | -0.34365800 | 0.58862600  |
| C | 2.99961100  | -0.27466000 | -1.05377600 |
| C | 3.22589200  | -1.47992400 | -0.32920600 |
| C | 4.13234100  | 0.39285500  | -1.59548500 |
| C | 4.51270400  | -1.96820700 | -0.16184400 |
| H | 2.36384100  | -2.01344800 | 0.07625400  |
| C | 5.41081700  | -0.11003600 | -1.41569400 |
| H | 3.97857200  | 1.32142700  | -2.15120500 |
| C | 5.61909000  | -1.29486600 | -0.69663000 |
| H | 4.66116200  | -2.89657200 | 0.39463600  |
| H | 6.26416900  | 0.42583800  | -1.83846600 |
| H | 6.62778100  | -1.68658000 | -0.55590300 |
| S | -0.81181800 | -1.55766900 | 0.96715000  |
| O | -0.35580000 | -2.80874900 | 0.37511400  |
| O | -1.07514400 | -1.49772000 | 2.39569700  |
| C | -2.29253600 | -1.07710500 | 0.10113600  |
| C | -3.20717900 | -0.23771100 | 0.73275900  |
| C | -2.49245100 | -1.53204500 | -1.19765700 |
| C | -4.34844100 | 0.14685000  | 0.03695500  |
| H | -2.99228700 | 0.10998800  | 1.74377900  |
| C | -3.64075900 | -1.13269700 | -1.87876700 |
| H | -1.74870500 | -2.18911100 | -1.64948800 |
| C | -4.57881300 | -0.28894300 | -1.27481900 |
| H | -5.07386800 | 0.80792800  | 0.51702900  |
| H | -3.81090700 | -1.48048500 | -2.90040100 |
| C | -5.80006700 | 0.17490700  | -2.02576800 |
| H | -6.69194000 | 0.16058700  | -1.38311500 |
| H | -5.66639200 | 1.20895300  | -2.37982600 |
| H | -5.99460600 | -0.45737900 | -2.90258800 |
| H | 1.53126100  | 1.13823300  | -1.83637900 |

|   |             |             |             |
|---|-------------|-------------|-------------|
| C | 1.06859000  | 2.12548000  | 0.78593900  |
| C | 1.12376700  | 0.61469800  | 2.79917500  |
| H | 2.12927000  | 0.28466100  | 2.50379900  |
| H | 1.20930500  | 1.45038300  | 3.50911200  |
| H | 0.57982000  | -0.21191100 | 3.26857300  |
| C | 1.05015600  | 4.06878100  | -0.79943400 |
| H | 0.71706800  | 5.07914100  | -0.51858300 |
| H | 2.14285400  | 3.99920900  | -0.71295700 |
| H | 0.75675500  | 3.91553900  | -1.84996800 |
| C | 0.32813500  | 3.04620500  | 0.05771400  |
| C | 0.37149000  | 1.11953500  | 1.58565900  |
| O | -0.94352800 | 3.09440400  | 0.05001400  |
| O | -0.92283900 | 1.39576000  | 1.83663800  |
| H | -1.17655500 | 2.09958400  | 1.11977400  |
| H | 2.15682700  | 2.13214900  | 0.77209300  |

Thermal correction to Gibbs Free Energy= 0.310879

Esolv(UM062X) = -1545.22080584

### Int2(S)

|   |             |             |             |
|---|-------------|-------------|-------------|
| C | -0.90566700 | 1.12494000  | -0.53655400 |
| N | -0.26491400 | 0.03859200  | -0.33044900 |
| N | -0.81196500 | -1.17758400 | -0.48848600 |
| C | -0.19891600 | 2.40381600  | -0.34217800 |
| C | 1.18199500  | 2.47056400  | -0.09623600 |
| C | -0.93759900 | 3.59319900  | -0.39805500 |
| C | 1.80199000  | 3.70107300  | 0.09070000  |
| H | 1.74792800  | 1.53695600  | -0.05746700 |
| C | -0.31232800 | 4.82525200  | -0.20871800 |
| H | -2.01337100 | 3.52695100  | -0.58205200 |
| C | 1.05931200  | 4.88482800  | 0.03546800  |



|   |             |             |             |
|---|-------------|-------------|-------------|
| H | 2.87710000  | 3.74167600  | 0.28079300  |
| H | -0.90045500 | 5.74434600  | -0.25084400 |
| H | 1.55044700  | 5.84890300  | 0.18222200  |
| S | 0.16295400  | -2.34520700 | 0.26701100  |
| O | -0.17916300 | -2.49837500 | 1.67837700  |
| O | 0.20596600  | -3.53640600 | -0.56965900 |
| C | 1.78141800  | -1.58868200 | 0.18848900  |
| C | 2.49186900  | -1.64210600 | -1.00544200 |
| C | 2.31774800  | -1.00612500 | 1.32938700  |
| C | 3.75679800  | -1.06419500 | -1.05977500 |
| H | 2.04261700  | -2.12634900 | -1.87370800 |
| C | 3.58818600  | -0.43877500 | 1.26049000  |
| H | 1.72582700  | -0.99503900 | 2.24535200  |
| C | 4.31901200  | -0.44900000 | 0.06664000  |
| H | 4.32226200  | -1.09013900 | -1.99427100 |
| H | 4.01862400  | 0.02912100  | 2.14900200  |
| C | 5.66851400  | 0.21624400  | -0.01675200 |
| H | 6.33060000  | -0.30970300 | -0.71843200 |
| H | 5.56724500  | 1.25380000  | -0.37234200 |
| H | 6.15912500  | 0.24845600  | 0.96551000  |
| H | -1.95301000 | 1.18684300  | -0.84628700 |
| C | -2.99562400 | -0.70353500 | 0.66598200  |
| C | -2.64639300 | -2.87826700 | -0.55038100 |
| H | -2.32067200 | -3.37415600 | 0.37423500  |
| H | -3.73432900 | -2.98435500 | -0.64731000 |
| H | -2.14987400 | -3.34190700 | -1.41172100 |
| C | -4.43167300 | 1.02157200  | 1.76687400  |
| H | -5.52058400 | 1.08130500  | 1.61539800  |
| H | -4.21621000 | 0.45782200  | 2.68447200  |
| H | -4.06760000 | 2.05509400  | 1.87946500  |

|   |             |             |             |
|---|-------------|-------------|-------------|
| C | -3.79406000 | 0.40631900  | 0.53512300  |
| C | -2.38667000 | -1.37262500 | -0.52859500 |
| O | -4.04003000 | 1.00484000  | -0.58127900 |
| O | -2.79979800 | -0.82645600 | -1.71723300 |
| H | -3.37788700 | -0.01669200 | -1.46237900 |
| H | -2.80016500 | -1.15248300 | 1.64027700  |

Thermal correction to Gibbs Free Energy= 0.317619

Esolv(RM062X) = -1545.30068586

### Int2(T)

|   |             |             |             |
|---|-------------|-------------|-------------|
| C | 1.64827500  | 0.25961200  | -1.17462300 |
| N | 0.55385700  | -0.41579400 | -0.67971700 |
| N | 0.27099300  | -0.37791700 | 0.61028600  |
| C | 2.95521000  | -0.28021900 | -1.06347000 |
| C | 3.19680400  | -1.49677000 | -0.36390200 |
| C | 4.07667800  | 0.39807000  | -1.61469600 |
| C | 4.48660800  | -1.98822600 | -0.23147800 |
| H | 2.34352700  | -2.03780500 | 0.05019600  |
| C | 5.35843700  | -0.10771600 | -1.46970700 |
| H | 3.91166900  | 1.33684800  | -2.14948900 |
| C | 5.58175200  | -1.30541400 | -0.77684700 |
| H | 4.64626100  | -2.92614900 | 0.30560800  |
| H | 6.20300200  | 0.43643200  | -1.89950200 |
| H | 6.59314100  | -1.69901800 | -0.66364600 |
| S | -0.90743800 | -1.56248800 | 0.96149900  |
| O | -0.47361300 | -2.80942800 | 0.35009600  |
| O | -1.19199200 | -1.52415800 | 2.38499900  |
| C | -2.35159000 | -1.01233700 | 0.07885300  |
| C | -3.24484800 | -0.14950800 | 0.70942400  |
| C | -2.54816500 | -1.44622200 | -1.22739100 |

|   |             |             |             |
|---|-------------|-------------|-------------|
| C | -4.36273900 | 0.28100800  | 0.00304700  |
| H | -3.02950400 | 0.18090900  | 1.72597000  |
| C | -3.67299300 | -1.00027400 | -1.91862400 |
| H | -1.82009900 | -2.12187200 | -1.67726700 |
| C | -4.58982900 | -0.13207200 | -1.31676800 |
| H | -5.07150900 | 0.96138100  | 0.48093500  |
| H | -3.84065100 | -1.32993500 | -2.94657000 |
| C | -5.78425700 | 0.38183700  | -2.07802100 |
| H | -6.68486800 | 0.38931500  | -1.44760400 |
| H | -5.61093800 | 1.41522200  | -2.41636800 |
| H | -5.98739100 | -0.23230000 | -2.96566000 |
| H | 1.46425200  | 1.13137600  | -1.80756600 |
| C | 1.19278400  | 1.96373200  | 0.84970600  |
| C | 1.09143300  | 0.43467600  | 2.82739900  |
| H | 2.08611800  | 0.04495800  | 2.56750000  |
| H | 1.20415400  | 1.28405600  | 3.51529500  |
| H | 0.49594300  | -0.34895300 | 3.30732000  |
| C | 1.37622400  | 4.00823000  | -0.58287600 |
| H | 1.08021400  | 5.01624200  | -0.25537800 |
| H | 2.45624200  | 3.87077500  | -0.43680300 |
| H | 1.14268900  | 3.94093500  | -1.65763200 |
| C | 0.54572000  | 2.97558500  | 0.15824800  |
| C | 0.39761700  | 0.94744300  | 1.57453300  |
| O | -0.71869500 | 3.09950800  | 0.07886100  |
| O | -0.88682600 | 1.34040600  | 1.82694800  |
| H | -1.06563600 | 2.07564200  | 1.13165000  |
| H | 2.27873400  | 1.92847200  | 0.91695500  |

Thermal correction to Gibbs Free Energy= 0.310101

Esolv(UM062X) = -1545.22187145

**TS2(S)**

|   |             |             |             |
|---|-------------|-------------|-------------|
| C | -1.28023900 | 0.34611500  | -0.23805000 |
| N | -0.24950200 | 0.18319500  | 0.60155700  |
| N | 0.29154300  | -1.03534100 | 0.14876900  |
| C | -2.23997500 | 1.44346000  | 0.06501800  |
| C | -2.28407500 | 2.02051800  | 1.34012100  |
| C | -3.13402400 | 1.89170600  | -0.91467700 |
| C | -3.20013500 | 3.03106900  | 1.62362300  |
| H | -1.57718800 | 1.64720700  | 2.08317700  |
| C | -4.05727300 | 2.89668400  | -0.62782400 |
| H | -3.09903600 | 1.43107000  | -1.90632700 |
| C | -4.09214100 | 3.47179500  | 0.64299800  |
| H | -3.22302800 | 3.47928300  | 2.61958400  |
| H | -4.75147200 | 3.23460500  | -1.40026700 |
| H | -4.81261300 | 4.26065500  | 0.86920600  |
| S | 1.72354600  | -1.37153100 | 0.91360500  |
| O | 1.68282300  | -1.15578700 | 2.35644900  |
| O | 2.21900500  | -2.65210600 | 0.41562700  |
| C | 2.76977400  | -0.09038600 | 0.23672200  |
| C | 3.70744800  | -0.43674300 | -0.72624200 |
| C | 2.65831000  | 1.21865300  | 0.70597400  |
| C | 4.55164600  | 0.55084100  | -1.23711300 |
| H | 3.76026600  | -1.47442800 | -1.05862700 |
| C | 3.50314000  | 2.19015900  | 0.18184500  |
| H | 1.89671700  | 1.44619200  | 1.45176300  |
| C | 4.45983800  | 1.87240700  | -0.79398200 |
| H | 5.29389400  | 0.28875100  | -1.99503600 |
| H | 3.42085500  | 3.22192900  | 0.53331500  |
| C | 5.35547000  | 2.94751300  | -1.35449900 |
| H | 6.11117800  | 2.52493700  | -2.03020900 |

|   |             |             |             |
|---|-------------|-------------|-------------|
| H | 4.77144500  | 3.68920100  | -1.92073000 |
| H | 5.87772200  | 3.48772400  | -0.55081400 |
| H | -1.12406200 | 0.19759900  | -1.33123400 |
| C | -2.10051100 | -1.34085600 | -0.02380600 |
| C | -0.76966700 | -3.04489500 | 1.26802800  |
| H | -0.80752900 | -2.42781000 | 2.17649500  |
| H | -1.62753900 | -3.73116300 | 1.24193500  |
| H | 0.15830200  | -3.63110000 | 1.26633600  |
| C | -4.46360100 | -1.26969900 | -0.93313700 |
| H | -4.90546500 | -2.20209300 | -0.54673100 |
| H | -4.64986600 | -0.47564300 | -0.19582400 |
| H | -4.94280000 | -1.01940400 | -1.88852400 |
| C | -2.97491800 | -1.47378600 | -1.15841200 |
| C | -0.80219000 | -2.14410000 | 0.03706700  |
| O | -2.54971800 | -1.62729900 | -2.31121800 |
| O | -0.56268100 | -2.91570800 | -1.08118600 |
| H | -0.99687100 | -2.46768200 | -1.83125500 |
| H | -2.60063300 | -1.24584000 | 0.94450500  |

Thermal correction to Gibbs Free Energy= 0.317443

Esolv(RM062X) = -1545.28039237

### TS2(T)

|   |             |             |             |
|---|-------------|-------------|-------------|
| C | -1.38377900 | -0.59340500 | 0.30050500  |
| N | -0.43140700 | -0.60894400 | -0.72933700 |
| N | 0.04154700  | 0.58200600  | -1.09552100 |
| C | -2.68140300 | -1.13566800 | 0.07175100  |
| C | -3.18041900 | -1.36207100 | -1.24067100 |
| C | -3.56521100 | -1.39020900 | 1.15599100  |
| C | -4.47496500 | -1.81527500 | -1.44231800 |
| H | -2.51346600 | -1.18071800 | -2.08589500 |

|   |             |             |             |
|---|-------------|-------------|-------------|
| C | -4.85934500 | -1.83763400 | 0.93697200  |
| H | -3.20629400 | -1.22448600 | 2.17502500  |
| C | -5.33563700 | -2.05846400 | -0.36230200 |
| H | -4.82717800 | -1.98578300 | -2.46310000 |
| H | -5.51373500 | -2.02204000 | 1.79303500  |
| H | -6.35396100 | -2.41288100 | -0.52957400 |
| S | 1.55221000  | 0.38028800  | -1.86472000 |
| O | 1.38032300  | -0.59846600 | -2.92119400 |
| O | 2.08929100  | 1.69408400  | -2.17389900 |
| C | 2.57051100  | -0.36183300 | -0.60670400 |
| C | 3.28634900  | 0.46021200  | 0.26013000  |
| C | 2.61703100  | -1.74816900 | -0.51024400 |
| C | 4.07491200  | -0.13433900 | 1.23950700  |
| H | 3.18770200  | 1.54185000  | 0.16582600  |
| C | 3.40867700  | -2.32373700 | 0.48194400  |
| H | 2.03357600  | -2.34839800 | -1.20896600 |
| C | 4.14442800  | -1.52849100 | 1.36674400  |
| H | 4.64240400  | 0.49550700  | 1.92868500  |
| H | 3.45360800  | -3.41138800 | 0.57280900  |
| C | 4.97258900  | -2.15044100 | 2.46118000  |
| H | 5.94251400  | -1.64306600 | 2.56303100  |
| H | 4.45617500  | -2.07033200 | 3.43036600  |
| H | 5.15711200  | -3.21545900 | 2.26671000  |
| H | -0.95979100 | -0.67237700 | 1.31151900  |
| C | -1.55361800 | 1.62325800  | 0.44686900  |
| C | -0.44710800 | 3.00125200  | -1.31474900 |
| H | -1.23394200 | 2.74151800  | -2.03705200 |
| H | -0.74989200 | 3.90015500  | -0.76036100 |
| H | 0.49226900  | 3.19551800  | -1.84235300 |
| C | -2.97130100 | 1.96916000  | 2.49986800  |

|   |             |            |             |
|---|-------------|------------|-------------|
| H | -3.05027800 | 2.96114400 | 2.97323000  |
| H | -3.80499200 | 1.82490300 | 1.80047900  |
| H | -3.04219700 | 1.22481200 | 3.30802600  |
| C | -1.61709400 | 1.83843000 | 1.83315500  |
| C | -0.26698900 | 1.87509500 | -0.29695900 |
| O | -0.59580900 | 1.85281100 | 2.58573300  |
| O | 0.79824500  | 2.14145700 | 0.53659100  |
| H | 0.45163900  | 2.00213300 | 1.48410100  |
| H | -2.46977700 | 1.71824200 | -0.13787600 |

Thermal correction to Gibbs Free Energy= 0.311961

Esolv(UM062X) = -1545.2175627

**Int3(S)**

|   |             |             |             |
|---|-------------|-------------|-------------|
| C | -1.35558600 | 0.31098600  | -0.27342600 |
| N | -0.27965100 | 0.25622400  | 0.60897600  |
| N | 0.30286900  | -0.97399400 | 0.16866000  |
| C | -2.34608200 | 1.39790800  | 0.04528300  |
| C | -2.36931100 | 1.97408300  | 1.32033400  |
| C | -3.27615200 | 1.82696900  | -0.90856100 |
| C | -3.30856400 | 2.95602700  | 1.63256100  |
| H | -1.62374500 | 1.61872400  | 2.03404200  |
| C | -4.22245500 | 2.80304000  | -0.59413300 |
| H | -3.24667100 | 1.38559900  | -1.90965600 |
| C | -4.24132400 | 3.37154900  | 0.68000100  |
| H | -3.31435600 | 3.40415000  | 2.62898300  |
| H | -4.94322200 | 3.12643200  | -1.34851800 |
| H | -4.97748900 | 4.13928500  | 0.92797500  |
| S | 1.71367000  | -1.29691100 | 0.96728700  |
| O | 1.65555300  | -1.03176100 | 2.40083600  |
| O | 2.19942400  | -2.60614100 | 0.53191700  |

|   |             |             |             |
|---|-------------|-------------|-------------|
| C | 2.78654600  | -0.05959900 | 0.25253200  |
| C | 3.85164900  | -0.48457600 | -0.53049400 |
| C | 2.57810700  | 1.29475600  | 0.52365500  |
| C | 4.72695200  | 0.46396400  | -1.06238900 |
| H | 3.97490700  | -1.55293000 | -0.71347500 |
| C | 3.45556000  | 2.22471000  | -0.02362200 |
| H | 1.71073000  | 1.58051300  | 1.11860200  |
| C | 4.53996600  | 1.82680400  | -0.81939300 |
| H | 5.56802800  | 0.13809900  | -1.67946800 |
| H | 3.29777300  | 3.28921600  | 0.16915900  |
| C | 5.46883400  | 2.85897800  | -1.40639600 |
| H | 6.32186300  | 2.38660200  | -1.91216100 |
| H | 4.94398200  | 3.48693800  | -2.14277700 |
| H | 5.86087000  | 3.52918800  | -0.62685800 |
| H | -1.10565100 | 0.35171100  | -1.36824300 |
| C | -2.02541100 | -1.16835900 | -0.12485000 |
| C | -0.85739800 | -2.87128600 | 1.35322500  |
| H | -0.91006700 | -2.18122400 | 2.20671500  |
| H | -1.75166000 | -3.51110200 | 1.32522100  |
| H | 0.03645100  | -3.50216600 | 1.44613800  |
| C | -4.37202000 | -1.55603100 | -1.07470800 |
| H | -4.60960700 | -2.38178800 | -0.38654900 |
| H | -4.71146700 | -0.62310600 | -0.59805200 |
| H | -4.88534700 | -1.70353800 | -2.03266800 |
| C | -2.87532600 | -1.49564500 | -1.29786400 |
| C | -0.75735300 | -2.05161000 | 0.07417100  |
| O | -2.40686100 | -1.61465600 | -2.41778500 |
| O | -0.49585000 | -2.91961700 | -0.97287400 |
| H | -0.62666500 | -2.42144800 | -1.79333600 |
| H | -2.61182000 | -1.14278500 | 0.80256500  |



Thermal correction to Gibbs Free Energy= 0.317999

Esolv(RM062X) = -1545.28595404

**Int3(T)**

|   |             |             |             |
|---|-------------|-------------|-------------|
| C | -1.35404300 | -0.23742300 | 0.01365800  |
| N | -0.36031500 | -0.26406100 | -1.04192500 |
| N | 0.20047300  | 0.95610500  | -1.04032300 |
| C | -2.55724900 | -1.08394500 | -0.25210900 |
| C | -2.88112000 | -1.54351700 | -1.53179200 |
| C | -3.42188700 | -1.36581100 | 0.81643600  |
| C | -4.05425400 | -2.26841800 | -1.74353700 |
| H | -2.19412900 | -1.32710800 | -2.35166100 |
| C | -4.59667800 | -2.08277700 | 0.59978800  |
| H | -3.14860500 | -1.01296900 | 1.81476500  |
| C | -4.91831900 | -2.53655100 | -0.68097000 |
| H | -4.29612600 | -2.62609500 | -2.74687000 |
| H | -5.26504300 | -2.29303500 | 1.43759200  |
| H | -5.83774300 | -3.10125400 | -0.84896100 |
| S | 1.79401700  | 0.95356800  | -1.60131600 |
| O | 1.80214000  | 0.33641500  | -2.91454900 |
| O | 2.31079800  | 2.29837700  | -1.41690100 |
| C | 2.65332300  | -0.14660400 | -0.49467200 |
| C | 3.10188900  | 0.33379600  | 0.73437700  |
| C | 2.83967900  | -1.46981000 | -0.87658800 |
| C | 3.76580200  | -0.54210900 | 1.58563900  |
| H | 2.88919900  | 1.36602000  | 1.01335100  |
| C | 3.50460800  | -2.33265300 | -0.00649700 |
| H | 2.46346700  | -1.80045000 | -1.84505200 |
| C | 3.97482100  | -1.88244500 | 1.23078400  |
| H | 4.12022700  | -0.18310400 | 2.55478900  |

|   |             |             |             |
|---|-------------|-------------|-------------|
| H | 3.65724500  | -3.37585000 | -0.29241000 |
| C | 4.66862300  | -2.81863600 | 2.18605200  |
| H | 5.59652300  | -2.37369300 | 2.57380300  |
| H | 4.02395100  | -3.03810200 | 3.05097700  |
| H | 4.91866300  | -3.77169500 | 1.70121000  |
| H | -0.86283500 | -0.58382700 | 0.94619100  |
| C | -1.68585200 | 1.26245500  | 0.28859800  |
| C | -0.32407200 | 3.32164700  | -0.40710600 |
| H | -0.79689400 | 3.40282100  | -1.39626500 |
| H | -0.92278700 | 3.87631200  | 0.33094500  |
| H | 0.68907400  | 3.73645800  | -0.44653500 |
| C | -3.59236900 | 1.93322000  | 1.97495200  |
| H | -3.62451900 | 2.76109900  | 2.70829600  |
| H | -4.12399700 | 2.25529300  | 1.06624700  |
| H | -4.18477100 | 1.10989500  | 2.43122100  |
| C | -2.17893700 | 1.53412200  | 1.67565000  |
| C | -0.27573500 | 1.87928100  | 0.06515300  |
| O | -1.38587900 | 1.14777500  | 2.64170700  |
| O | 0.50344400  | 1.73010300  | 1.18488200  |
| H | -0.16461900 | 1.42929500  | 1.95774900  |
| H | -2.37505100 | 1.62429200  | -0.49059800 |

Thermal correction to Gibbs Free Energy= 0.315034

Esolv(UM062X) = -1545.24798104

### Int3(S)-1

|   |             |             |             |
|---|-------------|-------------|-------------|
| C | 0.25785500  | 0.54117000  | -0.04716100 |
| N | 0.17593200  | -0.36007100 | -1.14981100 |
| N | -0.21730000 | -1.57176500 | -0.50468000 |
| C | 0.98072400  | 1.81867200  | -0.38258700 |
| C | 2.19849300  | 1.78676600  | -1.07789600 |

|   |             |             |             |
|---|-------------|-------------|-------------|
| C | 0.47464300  | 3.05536400  | 0.03127100  |
| C | 2.88903500  | 2.96909400  | -1.33704600 |
| H | 2.60300600  | 0.82499900  | -1.40155300 |
| C | 1.16577200  | 4.24055700  | -0.23087300 |
| H | -0.47751700 | 3.07603800  | 0.56839300  |
| C | 2.37856900  | 4.20062100  | -0.91664000 |
| H | 3.84230100  | 2.92225400  | -1.86799700 |
| H | 0.75374300  | 5.19694800  | 0.10193800  |
| H | 2.92679800  | 5.12400700  | -1.12115200 |
| S | -1.70521200 | -2.12281100 | -0.96891500 |
| O | -1.70616400 | -2.29040300 | -2.41617100 |
| O | -2.08787000 | -3.26959300 | -0.14251800 |
| C | -2.81885900 | -0.76565600 | -0.64893600 |
| C | -3.61349000 | -0.76288000 | 0.49609300  |
| C | -2.74195100 | 0.35104000  | -1.48272000 |
| C | -4.35198900 | 0.37320700  | 0.80645200  |
| H | -3.60278200 | -1.64847800 | 1.13316200  |
| C | -3.45951300 | 1.49738600  | -1.13140800 |
| H | -2.09855000 | 0.30735100  | -2.36019700 |
| C | -4.26792900 | 1.52532300  | 0.00796800  |
| H | -4.98537000 | 0.38453300  | 1.69838800  |
| H | -3.38453400 | 2.39196600  | -1.75577600 |
| C | -5.02113400 | 2.77311800  | 0.39715600  |
| H | -6.06860300 | 2.54702500  | 0.65066400  |
| H | -4.56648500 | 3.24873300  | 1.28082300  |
| H | -5.01662600 | 3.51074800  | -0.41758700 |
| H | -0.71819200 | 0.82061900  | 0.43937500  |
| C | 1.00418700  | -0.33761200 | 1.02970600  |
| C | 0.85273200  | -2.88196600 | 1.30090200  |
| H | 1.80035600  | -2.92482200 | 0.74645800  |

|   |             |             |             |
|---|-------------|-------------|-------------|
| H | 1.07411400  | -2.90327300 | 2.37944300  |
| H | 0.19753300  | -3.72678000 | 1.04777500  |
| C | 2.57183400  | 0.81615500  | 2.63322200  |
| H | 3.30024900  | 0.03303400  | 2.36409300  |
| H | 2.76765100  | 1.65013300  | 1.93642600  |
| H | 2.66154800  | 1.16720600  | 3.66953900  |
| C | 1.17629600  | 0.32412200  | 2.35509500  |
| C | 0.12220400  | -1.59334500 | 0.96466800  |
| O | 0.24869700  | 0.53130400  | 3.12791500  |
| O | -1.02079900 | -1.46494100 | 1.77774500  |
| H | -0.90431400 | -0.66209500 | 2.31502600  |
| H | 1.99761500  | -0.58522000 | 0.63017100  |
| C | 4.41604400  | -1.32954800 | -0.56109900 |
| O | 3.84459000  | -1.37689400 | 0.55670100  |
| O | 3.55481300  | -1.23288000 | -1.66850200 |
| O | 5.61124800  | -1.35138800 | -0.83924900 |
| H | 2.63378400  | -1.23825300 | -1.35770200 |

Thermal correction to Gibbs Free Energy= 0.339776

Esolv(RM062X) = -1809.88125971

### TS3(S)

|   |             |             |             |
|---|-------------|-------------|-------------|
| C | 0.45969300  | 0.50183300  | 0.08335400  |
| N | 0.36894800  | -0.38900000 | -1.05911400 |
| N | -0.13807500 | -1.57998100 | -0.44836000 |
| C | 1.17236800  | 1.78740000  | -0.25352000 |
| C | 2.33413300  | 1.80943400  | -1.03895200 |
| C | 0.66354600  | 3.00919200  | 0.20588900  |
| C | 2.97919300  | 3.01468500  | -1.31259000 |
| H | 2.71316400  | 0.87252600  | -1.44461600 |
| C | 1.30894900  | 4.21651400  | -0.06450200 |

|   |             |             |             |
|---|-------------|-------------|-------------|
| H | -0.26154100 | 3.00012500  | 0.78955600  |
| C | 2.47925700  | 4.22301000  | -0.82216700 |
| H | 3.88704600  | 3.00545100  | -1.92023800 |
| H | 0.89262000  | 5.15423300  | 0.31339200  |
| H | 2.99305500  | 5.16341600  | -1.03832900 |
| S | -1.62560700 | -2.02008300 | -0.99889100 |
| O | -1.57878000 | -2.12226300 | -2.45092900 |
| O | -2.11516500 | -3.17110000 | -0.24110100 |
| C | -2.68333400 | -0.61608300 | -0.66559100 |
| C | -3.51309900 | -0.61469600 | 0.45230800  |
| C | -2.55720400 | 0.51110700  | -1.47755700 |
| C | -4.23987900 | 0.53279400  | 0.75457100  |
| H | -3.53870700 | -1.50907800 | 1.07623300  |
| C | -3.26911900 | 1.66306700  | -1.14032700 |
| H | -1.87713900 | 0.46761400  | -2.32787300 |
| C | -4.11607100 | 1.69022700  | -0.02753000 |
| H | -4.89997800 | 0.54426000  | 1.62693900  |
| H | -3.15902800 | 2.56298100  | -1.75173500 |
| C | -4.85356600 | 2.95050100  | 0.35215400  |
| H | -5.85656300 | 2.72545200  | 0.74510300  |
| H | -4.31081500 | 3.50408800  | 1.13547300  |
| H | -4.96421000 | 3.62314500  | -0.51037600 |
| H | -0.55147700 | 0.79782500  | 0.46156400  |
| C | 1.06899100  | -0.42777700 | 1.17156000  |
| C | 0.87404000  | -2.98391600 | 1.30919400  |
| H | 1.77777500  | -3.07408200 | 0.69234600  |
| H | 1.15681900  | -3.00341900 | 2.37244000  |
| H | 0.17458000  | -3.80283200 | 1.08845300  |
| C | 2.13693900  | 1.24292500  | 2.74618500  |
| H | 2.93689800  | 1.29870500  | 1.99483600  |

|   |             |             |             |
|---|-------------|-------------|-------------|
| H | 1.51048100  | 2.14189600  | 2.63667900  |
| H | 2.55063200  | 1.21770000  | 3.76358100  |
| C | 1.29428200  | -0.00679100 | 2.53591400  |
| C | 0.18283500  | -1.66300800 | 1.00407600  |
| O | 0.90936900  | -0.63139400 | 3.53584600  |
| O | -1.00009600 | -1.54390300 | 1.78337500  |
| H | -0.64829800 | -1.32063600 | 2.66302900  |
| H | 2.29305400  | -0.70694500 | 0.68126800  |
| C | 3.69985700  | -1.38183700 | -0.95395000 |
| O | 3.46397800  | -0.93980900 | 0.24853100  |
| O | 2.69480100  | -1.31604200 | -1.83724400 |
| O | 4.78435600  | -1.82484900 | -1.30992800 |
| H | 1.77665700  | -0.91483100 | -1.49268300 |

Thermal correction to Gibbs Free Energy= 0.337022

Esolv(RM062X) = -1809.86435791

#### Int4(S)

|   |             |             |             |
|---|-------------|-------------|-------------|
| C | 0.41881000  | 0.62039500  | -0.04883500 |
| N | 0.37303600  | -0.35104300 | -1.16310900 |
| N | -0.16898400 | -1.51609600 | -0.57483400 |
| C | 1.26082400  | 1.82995000  | -0.38243400 |
| C | 2.56873600  | 1.70813800  | -0.87010100 |
| C | 0.73222500  | 3.11149000  | -0.18955500 |
| C | 3.32476200  | 2.85007600  | -1.13426000 |
| H | 2.97899000  | 0.70901100  | -1.05745400 |
| C | 1.49198400  | 4.25310200  | -0.44531500 |
| H | -0.29235100 | 3.20596900  | 0.18081700  |
| C | 2.79766900  | 4.12477700  | -0.91759600 |
| H | 4.34310600  | 2.73441100  | -1.51157400 |
| H | 1.06248700  | 5.24383500  | -0.27522700 |

|   |             |             |             |
|---|-------------|-------------|-------------|
| H | 3.40084100  | 5.01383100  | -1.11923100 |
| S | -1.63872500 | -1.94536400 | -1.17501400 |
| O | -1.58275300 | -1.88161800 | -2.62794300 |
| O | -2.06954500 | -3.17579000 | -0.53227500 |
| C | -2.77306200 | -0.64095100 | -0.69500000 |
| C | -3.46347900 | -0.72877100 | 0.51205700  |
| C | -2.89157600 | 0.47586600  | -1.51668600 |
| C | -4.28820800 | 0.32567000  | 0.89151400  |
| H | -3.30555800 | -1.60917800 | 1.13544900  |
| C | -3.71460100 | 1.52816700  | -1.11537500 |
| H | -2.32352400 | 0.50314600  | -2.44752400 |
| C | -4.41966000 | 1.46870100  | 0.09081700  |
| H | -4.83225900 | 0.27116700  | 1.83850700  |
| H | -3.80559700 | 2.41523100  | -1.74780500 |
| C | -5.27769700 | 2.62241600  | 0.54597400  |
| H | -6.23016600 | 2.27000800  | 0.96920700  |
| H | -4.76674400 | 3.20489100  | 1.32896000  |
| H | -5.50134700 | 3.30554900  | -0.28540100 |
| H | -0.62042800 | 0.99764700  | 0.06266300  |
| C | 0.77283000  | -0.23413400 | 1.15433600  |
| C | 1.16157200  | -2.77121900 | 1.06607000  |
| H | 1.98322600  | -2.67949300 | 0.34387300  |
| H | 1.55131800  | -2.72864800 | 2.09338700  |
| H | 0.61687800  | -3.71443400 | 0.90532600  |
| C | 1.26596900  | 1.54997900  | 2.88371700  |
| H | 1.88530100  | 2.05094500  | 2.12901400  |
| H | 0.36961000  | 2.16685200  | 3.07290100  |
| H | 1.82004700  | 1.47631600  | 3.83076500  |
| C | 0.84919000  | 0.13669300  | 2.48988200  |
| C | 0.18643100  | -1.61649300 | 0.88274400  |

|   |             |             |             |
|---|-------------|-------------|-------------|
| O | 0.55639600  | -0.65027400 | 3.44815200  |
| O | -0.96667000 | -1.82830200 | 1.66657700  |
| H | -0.63175400 | -1.50966900 | 2.54751400  |
| H | 3.06326200  | -0.73285600 | 0.82099200  |
| C | 4.19313100  | -1.40480000 | -0.58852400 |
| O | 3.99790600  | -0.98822400 | 0.72570700  |
| O | 3.18285200  | -1.29488200 | -1.33854200 |
| O | 5.32027900  | -1.81055100 | -0.85721800 |
| H | 1.34308000  | -0.61590800 | -1.40556900 |

Thermal correction to Gibbs Free Energy= 0.342478

Esolv(RM062X) = -1809.90475883

#### Int4(S)-1

|   |             |             |             |
|---|-------------|-------------|-------------|
| C | -1.70299000 | -0.19660600 | -0.50206800 |
| N | -2.28084800 | 1.13399700  | -0.14711400 |
| N | -1.56322600 | 1.70708700  | 0.91137100  |
| C | -2.81658800 | -1.22931200 | -0.59416600 |
| C | -3.89771200 | -0.98583300 | -1.45362700 |
| C | -2.79755900 | -2.41715600 | 0.14030900  |
| C | -4.94161300 | -1.90138700 | -1.56458900 |
| H | -3.91178800 | -0.06353200 | -2.04066500 |
| C | -3.84009500 | -3.33826500 | 0.02616700  |
| H | -1.95127200 | -2.60673800 | 0.80370100  |
| C | -4.91531700 | -3.08363200 | -0.82310100 |
| H | -5.77688600 | -1.69507600 | -2.23667600 |
| H | -3.80960200 | -4.26227600 | 0.60662000  |
| H | -5.72956600 | -3.80521800 | -0.91098100 |
| S | -0.63764900 | 3.04461600  | 0.40729900  |
| O | -1.47644200 | 3.76980800  | -0.53192000 |
| O | -0.13131600 | 3.70433800  | 1.59308700  |



|   |             |             |             |
|---|-------------|-------------|-------------|
| C | 0.72211500  | 2.35457100  | -0.51141700 |
| C | 1.93066500  | 2.09676700  | 0.13133800  |
| C | 0.50932800  | 1.98456800  | -1.83655900 |
| C | 2.93008900  | 1.42452900  | -0.56335500 |
| H | 2.04863900  | 2.40147000  | 1.17140200  |
| C | 1.51764000  | 1.30039700  | -2.51298400 |
| H | -0.44767600 | 2.21913700  | -2.30626700 |
| C | 2.73350000  | 1.00127500  | -1.88603100 |
| H | 3.87283500  | 1.18484200  | -0.06682500 |
| H | 1.35706900  | 0.98344200  | -3.54632100 |
| C | 3.81814900  | 0.23497900  | -2.59463200 |
| H | 4.67621000  | 0.88857200  | -2.81637300 |
| H | 4.17904600  | -0.58062100 | -1.95056300 |
| H | 3.45665900  | -0.18474400 | -3.54321500 |
| H | -1.25289600 | -0.12315400 | -1.50851300 |
| C | -0.63335800 | -0.40485900 | 0.53157100  |
| C | -1.90948000 | 0.07225300  | 2.68469000  |
| H | -2.86255000 | -0.20192100 | 2.20806700  |
| H | -1.49205700 | -0.81633200 | 3.17916300  |
| H | -2.08101800 | 0.86225300  | 3.42885500  |
| C | 0.79366600  | -1.98175400 | -0.80189800 |
| H | -0.03787500 | -2.00019200 | -1.51776300 |
| H | 1.70482400  | -1.62760900 | -1.30984300 |
| H | 0.99252800  | -3.01115800 | -0.46437300 |
| C | 0.51918700  | -1.10573300 | 0.39741900  |
| C | -0.89065000 | 0.57757500  | 1.66272700  |
| O | 1.48197900  | -1.06216000 | 1.30422800  |
| O | 0.25491100  | 0.99706400  | 2.30584100  |
| C | 3.96822800  | -2.69405500 | 0.63867000  |
| O | 2.96716000  | -3.17854800 | 1.37388400  |

|   |             |             |            |
|---|-------------|-------------|------------|
| O | 4.92222000  | -3.34606500 | 0.32046000 |
| O | 3.81901500  | -1.41243000 | 0.27893500 |
| H | 2.94099400  | -1.06773700 | 0.63275600 |
| H | 0.92801600  | 0.29685100  | 2.10959700 |
| H | 2.27674100  | -2.46340500 | 1.50571300 |
| H | -3.25292300 | 1.04570500  | 0.13902100 |

Thermal correction to Gibbs Free Energy= 0.3603

Esolv(RM062X) = -1810.38945895

#### TS4(S)

|   |             |             |             |
|---|-------------|-------------|-------------|
| C | 1.52581100  | -0.06033700 | -0.23971100 |
| N | 1.09048000  | -1.42168100 | -0.62959900 |
| N | 0.33407300  | -1.93154600 | 0.45510100  |
| C | 2.92045100  | 0.17849600  | -0.77915500 |
| C | 3.11076500  | 0.93051800  | -1.94068400 |
| C | 4.03574500  | -0.38343400 | -0.14731000 |
| C | 4.39042300  | 1.12235800  | -2.46270100 |
| H | 2.24018500  | 1.37355100  | -2.42969600 |
| C | 5.31465100  | -0.19745600 | -0.66756100 |
| H | 3.88021300  | -0.94487200 | 0.77750800  |
| C | 5.49561300  | 0.55743400  | -1.82809600 |
| H | 4.52454200  | 1.71763500  | -3.36786200 |
| H | 6.17723600  | -0.63504000 | -0.16110700 |
| H | 6.49797400  | 0.70964400  | -2.23280700 |
| S | -1.11943700 | -2.65905200 | -0.05730800 |
| O | -0.70699300 | -3.59960400 | -1.08190300 |
| O | -1.79810100 | -3.12081600 | 1.13994100  |
| C | -2.04711500 | -1.36563200 | -0.83163500 |
| C | -3.13347200 | -0.80288100 | -0.16441500 |
| C | -1.62356400 | -0.88804700 | -2.07085600 |

|   |             |             |             |
|---|-------------|-------------|-------------|
| C | -3.77222600 | 0.29064600  | -0.73272400 |
| H | -3.42008700 | -1.19655000 | 0.81005000  |
| C | -2.27085700 | 0.21715700  | -2.61373000 |
| H | -0.78180000 | -1.36537600 | -2.57153300 |
| C | -3.33176900 | 0.83691900  | -1.94554000 |
| H | -4.59712300 | 0.77095500  | -0.20255700 |
| H | -1.92854000 | 0.62614600  | -3.56688100 |
| C | -3.93414300 | 2.11328200  | -2.45572900 |
| H | -5.02717300 | 2.11780700  | -2.33542600 |
| H | -3.51486400 | 2.92932200  | -1.84379300 |
| H | -3.69160600 | 2.28223900  | -3.51386700 |
| H | 0.83460100  | 0.67044400  | -0.69882200 |
| C | 1.35600800  | -0.05757500 | 1.27101600  |
| C | 0.39363100  | -1.79530300 | 2.93667800  |
| H | 1.25182700  | -2.48078700 | 2.98897000  |
| H | 0.48074900  | -1.04844300 | 3.73384200  |
| H | -0.53451400 | -2.37080600 | 3.02442300  |
| C | 2.01956600  | 2.35722300  | 1.43500700  |
| H | 3.03378700  | 2.13938700  | 1.07289400  |
| H | 1.41107200  | 2.68204000  | 0.57368600  |
| H | 2.03933800  | 3.15939100  | 2.18264600  |
| C | 1.34222900  | 1.14017000  | 2.03097900  |
| C | 0.45401900  | -1.10437300 | 1.60268900  |
| O | 0.69210500  | 1.28009900  | 3.09093200  |
| O | -1.21705700 | -0.25582600 | 1.78930500  |
| C | -1.66906900 | 2.68942300  | 0.68965300  |
| O | -1.40340000 | 3.04411700  | 1.98365000  |
| O | -2.44741800 | 3.38332500  | 0.06425600  |
| O | -1.05434000 | 1.63815600  | 0.27057400  |
| H | -1.16071800 | 0.58231400  | 1.06976400  |

|   |             |             |             |
|---|-------------|-------------|-------------|
| H | -0.97157900 | 0.20569600  | 2.61111000  |
| H | -0.69342100 | 2.48914000  | 2.35113200  |
| H | 1.91046400  | -2.02354500 | -0.70435600 |

Thermal correction to Gibbs Free Energy= 0.357246

Esolv(RM062X) = -1810.35096825

### Int5(S)

|   |             |             |             |
|---|-------------|-------------|-------------|
| C | -0.94923300 | 0.69092800  | -0.38463700 |
| N | -0.25657200 | 1.75697400  | -1.13738500 |
| N | 0.63820200  | 2.38304200  | -0.23640500 |
| C | -2.36845400 | 0.50326100  | -0.86209300 |
| C | -2.81816700 | -0.78360400 | -1.17870100 |
| C | -3.25114800 | 1.58444500  | -0.95706100 |
| C | -4.13874400 | -0.97284700 | -1.58796500 |
| H | -2.13784700 | -1.63733600 | -1.06337100 |
| C | -4.56786600 | 1.39199900  | -1.37196300 |
| H | -2.91455600 | 2.58735800  | -0.67687300 |
| C | -5.01420900 | 0.10864700  | -1.68897900 |
| H | -4.48467800 | -1.98060900 | -1.82486000 |
| H | -5.24868800 | 2.24291000  | -1.43928500 |
| H | -6.04611000 | -0.04752400 | -2.00989400 |
| S | 2.25615400  | 2.13240400  | -0.76830700 |
| O | 2.34560000  | 2.76188600  | -2.07004800 |
| O | 3.10968900  | 2.56446100  | 0.32588800  |
| C | 2.35141500  | 0.38032500  | -0.95615800 |
| C | 2.57655800  | -0.40125200 | 0.17380300  |
| C | 2.07392100  | -0.18889200 | -2.19911100 |
| C | 2.52360000  | -1.78616600 | 0.04920100  |
| H | 2.75867900  | 0.04881600  | 1.15005200  |
| C | 2.02804500  | -1.57392100 | -2.29937800 |

|   |             |             |             |
|---|-------------|-------------|-------------|
| H | 1.88554700  | 0.46120600  | -3.05364200 |
| C | 2.24476500  | -2.39480800 | -1.18052100 |
| H | 2.66736000  | -2.40043300 | 0.93804500  |
| H | 1.80384700  | -2.03710600 | -3.26273600 |
| C | 2.12724100  | -3.88858800 | -1.29226700 |
| H | 2.72919100  | -4.39135300 | -0.52440800 |
| H | 1.07324800  | -4.16739200 | -1.12601400 |
| H | 2.44205100  | -4.23628500 | -2.28681400 |
| H | -0.42629000 | -0.26763800 | -0.51758500 |
| C | -0.73428600 | 1.11755700  | 1.06844900  |
| C | 0.97627600  | 2.62002500  | 2.26279700  |
| H | 1.53836000  | 3.50841600  | 1.96030300  |
| H | 0.24577800  | 2.84536700  | 3.04929700  |
| H | 1.67229300  | 1.87900000  | 2.68358200  |
| C | -2.79143600 | 0.03478100  | 2.18550900  |
| H | -3.48025200 | 0.70806100  | 1.65554600  |
| H | -2.70277100 | -0.89456900 | 1.60677800  |
| H | -3.15669900 | -0.17563200 | 3.19745600  |
| C | -1.41451000 | 0.63641000  | 2.29742200  |
| C | 0.27696600  | 2.01303000  | 1.09323300  |
| O | -0.88397500 | 0.76770200  | 3.38815000  |
| O | 1.33862600  | -1.06833000 | 2.82518200  |
| C | -0.40348500 | -2.88617700 | 0.69592300  |
| O | 0.48506400  | -3.64682300 | 1.43304800  |
| O | -0.85449000 | -3.39823400 | -0.32466600 |
| O | -0.62865800 | -1.73321700 | 1.16007900  |
| H | 0.64083000  | -1.17344300 | 2.12741400  |
| H | 0.85947100  | -0.56055900 | 3.49276700  |
| H | 0.76525700  | -3.09094300 | 2.17764300  |
| H | -0.91223300 | 2.47063500  | -1.45006100 |

Thermal correction to Gibbs Free Energy= 0.358974

Esolv(RM062X) = -1810.39643258

**Int5(S)-1**

|   |             |             |             |
|---|-------------|-------------|-------------|
| C | 0.96546200  | 0.08461800  | -0.21438000 |
| N | 0.32914100  | -0.66716600 | -1.31741700 |
| N | -0.42082000 | -1.72459600 | -0.75341700 |
| C | 2.41233000  | 0.38429300  | -0.54529600 |
| C | 2.82621400  | 1.68917600  | -0.81674900 |
| C | 3.34903800  | -0.65457100 | -0.59993500 |
| C | 4.15941400  | 1.95857800  | -1.12718300 |
| H | 2.09562700  | 2.50060900  | -0.77991600 |
| C | 4.68000200  | -0.38851800 | -0.91194900 |
| H | 3.03170800  | -1.67727800 | -0.37792400 |
| C | 5.08813000  | 0.92061000  | -1.17392600 |
| H | 4.47290900  | 2.98270900  | -1.33471400 |
| H | 5.40386100  | -1.20406300 | -0.94531300 |
| H | 6.13138300  | 1.13015500  | -1.41430300 |
| S | -2.09817800 | -1.49032300 | -1.10978900 |
| O | -2.20678100 | -1.50486000 | -2.54863300 |
| O | -2.82053000 | -2.42409100 | -0.26902100 |
| C | -2.36713600 | 0.16200700  | -0.52449000 |
| C | -2.62545600 | 0.36277500  | 0.82986500  |
| C | -2.20840600 | 1.22904100  | -1.40678100 |
| C | -2.71454600 | 1.66774800  | 1.30809200  |
| H | -2.75953500 | -0.49485000 | 1.49143900  |
| C | -2.30653500 | 2.52457600  | -0.91061100 |
| H | -2.00248400 | 1.02598300  | -2.45813300 |
| C | -2.55578200 | 2.76286000  | 0.44914300  |
| H | -2.91486200 | 1.83992400  | 2.36744400  |

|   |             |             |             |
|---|-------------|-------------|-------------|
| H | -2.18585600 | 3.37142700  | -1.58947400 |
| C | -2.68834000 | 4.16980500  | 0.96717700  |
| H | -2.42066700 | 4.23129300  | 2.03002300  |
| H | -2.05039000 | 4.86391000  | 0.40427400  |
| H | -3.72757700 | 4.51869100  | 0.86507600  |
| H | 0.43815800  | 1.04577200  | -0.06062200 |
| C | 0.74933200  | -0.83430700 | 0.97832000  |
| C | -0.57338700 | -2.99610000 | 1.42706000  |
| H | -0.97035000 | -3.77754400 | 0.77269300  |
| H | 0.23345500  | -3.36974600 | 2.06719400  |
| H | -1.38167200 | -2.66417500 | 2.09500200  |
| C | 2.05947800  | 0.64358100  | 2.59715500  |
| H | 3.05636900  | 0.55786500  | 2.13822000  |
| H | 1.56833200  | 1.51525900  | 2.13940100  |
| H | 2.16510100  | 0.78593100  | 3.67833900  |
| C | 1.27092300  | -0.62318500 | 2.34680900  |
| C | -0.06686800 | -1.85101000 | 0.61634700  |
| O | 1.06157300  | -1.41929000 | 3.23761400  |
| H | 1.03176800  | -1.08030800 | -1.92794500 |

Thermal correction to Gibbs Free Energy= 0.305846

Esolv(RM062X) = -1469.35570836

### Int6(S)

|   |             |             |             |
|---|-------------|-------------|-------------|
| C | -1.51606900 | 0.20799900  | -1.12909300 |
| N | -0.06284500 | -0.05154900 | -1.01711300 |
| N | 0.13970700  | -1.37791300 | -0.55654100 |
| C | -1.95838700 | 1.42185200  | -0.33057400 |
| C | -2.50920700 | 2.53069300  | -0.97463600 |
| C | -1.81849400 | 1.43595300  | 1.06147600  |
| C | -2.93282200 | 3.64016100  | -0.24214700 |

|   |             |             |             |
|---|-------------|-------------|-------------|
| H | -2.61659600 | 2.52421300  | -2.06288500 |
| C | -2.23701200 | 2.54533100  | 1.79316600  |
| H | -1.36900400 | 0.57807700  | 1.56737000  |
| C | -2.79893600 | 3.64724400  | 1.14476400  |
| H | -3.36721100 | 4.49914800  | -0.75597000 |
| H | -2.12601900 | 2.54885700  | 2.87864100  |
| H | -3.13057900 | 4.51178400  | 1.72194000  |
| S | 1.16631400  | -1.38675700 | 0.85540500  |
| O | 0.49142600  | -0.69450900 | 1.94182400  |
| O | 1.60105000  | -2.76100100 | 1.01521700  |
| C | 2.52259600  | -0.40213400 | 0.29568400  |
| C | 3.58878200  | -1.04006000 | -0.32980900 |
| C | 2.51177000  | 0.97378000  | 0.52029000  |
| C | 4.67096300  | -0.27034000 | -0.75090300 |
| H | 3.56583900  | -2.12184600 | -0.46857200 |
| C | 3.60204600  | 1.72172100  | 0.09374700  |
| H | 1.65447900  | 1.43286200  | 1.01429300  |
| C | 4.69397600  | 1.11378800  | -0.54491100 |
| H | 5.51693400  | -0.75462900 | -1.24225800 |
| H | 3.61049500  | 2.80119900  | 0.25812400  |
| C | 5.87611400  | 1.94060500  | -0.97336000 |
| H | 5.55199800  | 2.87103700  | -1.45949300 |
| H | 6.48516000  | 2.22066700  | -0.10041000 |
| H | 6.51974600  | 1.38898500  | -1.67009000 |
| H | -1.76023500 | 0.40190700  | -2.18863400 |
| C | -2.11784500 | -1.11158800 | -0.67598100 |
| C | -1.19575200 | -3.34173500 | 0.24089400  |
| H | -0.98278000 | -3.30223900 | 1.32044400  |
| H | -2.19808400 | -3.74935900 | 0.09114000  |
| H | -0.42339600 | -3.97372300 | -0.21384700 |



|   |             |             |             |
|---|-------------|-------------|-------------|
| C | -4.51390400 | -0.30672900 | -1.07313700 |
| H | -4.17996200 | 0.18419300  | -1.99867800 |
| H | -5.51418800 | -0.73334900 | -1.20565500 |
| H | -4.54367200 | 0.46751500  | -0.29139300 |
| C | -3.57128100 | -1.41364200 | -0.65251900 |
| C | -1.12792200 | -1.96621800 | -0.32846100 |
| O | -4.00444300 | -2.49198500 | -0.30815300 |
| H | 0.39206700  | 0.01892200  | -1.92303500 |

Thermal correction to Gibbs Free Energy= 0.306522

Esolv(RM062X) = -1469.34828527

### Int6(S)-1

|   |             |             |             |
|---|-------------|-------------|-------------|
| C | 1.42613000  | 0.28065400  | 0.77441200  |
| N | -0.02242600 | -0.00960500 | 0.70035900  |
| N | -0.20865000 | -1.24345600 | 0.02508500  |
| C | 1.79122700  | 1.63431400  | 0.19026500  |
| C | 2.38880100  | 2.61223100  | 0.98713100  |
| C | 1.52066700  | 1.91288200  | -1.15376700 |
| C | 2.72721600  | 3.85505900  | 0.45022000  |
| H | 2.59682500  | 2.39762600  | 2.03902500  |
| C | 1.85379700  | 3.15536000  | -1.68841500 |
| H | 1.03370000  | 1.15677000  | -1.77433700 |
| C | 2.46031800  | 4.12714400  | -0.88990800 |
| H | 3.19745100  | 4.61098100  | 1.08098800  |
| H | 1.64030600  | 3.36599000  | -2.73746100 |
| H | 2.72351800  | 5.09752700  | -1.31368800 |
| S | -1.35140000 | -1.06723100 | -1.28331000 |
| O | -0.81275900 | -0.13151100 | -2.25574800 |
| O | -1.70716800 | -2.41695100 | -1.67382600 |
| C | -2.70865100 | -0.31519600 | -0.44121300 |

|   |             |             |             |
|---|-------------|-------------|-------------|
| C | -3.66971100 | -1.14033600 | 0.13469300  |
| C | -2.80187400 | 1.07492600  | -0.39588200 |
| C | -4.75083500 | -0.54910100 | 0.78365400  |
| H | -3.56791800 | -2.22396100 | 0.06111300  |
| C | -3.88974600 | 1.64302800  | 0.25563100  |
| H | -2.02454500 | 1.68334000  | -0.85979800 |
| C | -4.87689000 | 0.84356000  | 0.85178000  |
| H | -5.51465700 | -1.18087200 | 1.24083000  |
| H | -3.97848000 | 2.73015600  | 0.30507200  |
| C | -6.06230100 | 1.47943300  | 1.52612500  |
| H | -5.76070400 | 2.36022500  | 2.10901200  |
| H | -6.79459500 | 1.81552600  | 0.77613600  |
| H | -6.56832700 | 0.77322300  | 2.19642800  |
| H | 1.73389700  | 0.29131700  | 1.84046500  |
| C | 2.03645800  | -0.90868500 | 0.07203100  |
| C | 1.14007200  | -2.98855300 | -1.16134200 |
| H | 0.88776000  | -2.78020400 | -2.21281300 |
| H | 2.16400300  | -3.36967100 | -1.12081900 |
| H | 0.40920400  | -3.71699000 | -0.79120700 |
| C | 4.38242900  | -0.35930600 | 0.88422300  |
| H | 4.02368100  | -0.41776500 | 1.92416700  |
| H | 5.40760500  | -0.73883200 | 0.81649400  |
| H | 4.35418600  | 0.69741900  | 0.58001500  |
| C | 3.49483800  | -1.18302500 | -0.01879800 |
| C | 1.04869200  | -1.73061200 | -0.37281900 |
| O | 3.94581400  | -2.03793100 | -0.74733500 |
| O | 2.01542800  | -2.32028500 | 2.21730400  |
| O | 1.88739800  | -1.49879300 | 3.07662300  |
| H | -0.41652100 | -0.12356700 | 1.63095400  |

Thermal correction to Gibbs Free Energy= 0.306081

Esolv(RM062X) = -1619.62381256

**TS5(S)**

|   |             |             |             |
|---|-------------|-------------|-------------|
| C | 1.47191300  | 0.16720000  | 0.61272800  |
| N | 0.07219600  | 0.02667400  | 0.42549200  |
| N | -0.23630000 | -1.32486700 | 0.30954800  |
| C | 2.07662800  | 1.35697900  | -0.10020100 |
| C | 2.57094900  | 2.45452900  | 0.60304700  |
| C | 2.12770500  | 1.33841400  | -1.49830100 |
| C | 3.14555600  | 3.52234800  | -0.08761100 |
| H | 2.49660100  | 2.46948400  | 1.69275500  |
| C | 2.70159800  | 2.40539400  | -2.18452800 |
| H | 1.70998000  | 0.48336600  | -2.03653700 |
| C | 3.21670500  | 3.49553800  | -1.47917700 |
| H | 3.53602500  | 4.37846700  | 0.46434700  |
| H | 2.74651600  | 2.38856300  | -3.27449800 |
| H | 3.66891400  | 4.32919800  | -2.01854000 |
| S | -1.39483000 | -1.58616000 | -0.98579600 |
| O | -0.77560000 | -1.15602400 | -2.22393100 |
| O | -1.86483100 | -2.94290500 | -0.80898600 |
| C | -2.64959200 | -0.44243800 | -0.51440000 |
| C | -3.58339700 | -0.83629300 | 0.44234700  |
| C | -2.68390900 | 0.81456900  | -1.11196800 |
| C | -4.57142800 | 0.06848400  | 0.81311000  |
| H | -3.53295600 | -1.83710100 | 0.87353300  |
| C | -3.68409600 | 1.70178800  | -0.72768700 |
| H | -1.93553000 | 1.07865800  | -1.86014700 |
| C | -4.63423200 | 1.34641000  | 0.23899100  |
| H | -5.31369300 | -0.22225700 | 1.55887200  |
| H | -3.72952200 | 2.69093000  | -1.18688100 |

|   |             |             |             |
|---|-------------|-------------|-------------|
| C | -5.69027200 | 2.32491100  | 0.67502400  |
| H | -5.87003400 | 3.08773800  | -0.09305800 |
| H | -6.63833700 | 1.81546500  | 0.89235600  |
| H | -5.37349000 | 2.84188100  | 1.59391500  |
| H | 1.60281700  | 0.41148600  | 1.77839500  |
| C | 2.01202800  | -1.20505900 | 0.38043600  |
| C | 0.92759500  | -3.51574900 | -0.05552100 |
| H | 0.69025100  | -3.69145900 | -1.11610200 |
| H | 1.91099200  | -3.94089700 | 0.15957700  |
| H | 0.13710200  | -3.99252400 | 0.53586600  |
| C | 4.43119700  | -0.52300600 | 0.85545900  |
| H | 4.08050200  | 0.03994000  | 1.73305200  |
| H | 5.39548400  | -0.99834500 | 1.06540700  |
| H | 4.54677200  | 0.19917700  | 0.03299600  |
| C | 3.44341100  | -1.59591100 | 0.45811100  |
| C | 0.95778500  | -2.05097300 | 0.21187000  |
| O | 3.80838200  | -2.72491600 | 0.21623700  |
| O | -0.29627400 | 0.64928800  | 2.77340000  |
| O | 0.91530200  | 0.86033000  | 2.97177000  |
| H | -0.47507800 | 0.48515800  | 1.21384400  |

Thermal correction to Gibbs Free Energy= 0.302984

Esolv(RM062X) = -1619.61272925

**4e with hydrogen peroxide**

|   |             |             |             |
|---|-------------|-------------|-------------|
| C | 1.56333500  | -0.21325000 | -0.34004100 |
| N | 0.36448400  | -0.23401000 | -0.88439100 |
| N | -0.17277500 | -1.41503700 | -0.52848100 |
| C | 2.39636400  | 1.00877100  | -0.46657500 |
| C | 2.50840700  | 1.88152600  | 0.62194000  |
| C | 3.04439500  | 1.30654500  | -1.66856900 |
| C | 3.28769900  | 3.03105200  | 0.51065600  |

|   |             |             |             |
|---|-------------|-------------|-------------|
| H | 1.96516500  | 1.65570100  | 1.54234900  |
| C | 3.82467700  | 2.45718600  | -1.77409500 |
| H | 2.93648400  | 0.62864500  | -2.51724300 |
| C | 3.95091900  | 3.31654600  | -0.68334100 |
| H | 3.37105300  | 3.71220600  | 1.35870400  |
| H | 4.33378900  | 2.68405900  | -2.71190300 |
| H | 4.56198300  | 4.21666900  | -0.76634900 |
| S | -1.77535500 | -1.73138900 | -1.10906600 |
| O | -1.72648000 | -1.62497200 | -2.54444800 |
| O | -2.18358500 | -2.94110800 | -0.43098300 |
| C | -2.64179000 | -0.34570300 | -0.44859600 |
| C | -3.08816000 | -0.40232500 | 0.86993300  |
| C | -2.84740900 | 0.77090300  | -1.25417200 |
| C | -3.71671100 | 0.71866300  | 1.40329400  |
| H | -2.94863900 | -1.31377900 | 1.45470600  |
| C | -3.48691100 | 1.87550800  | -0.70300300 |
| H | -2.49733900 | 0.76176200  | -2.28721200 |
| C | -3.90663600 | 1.87559400  | 0.63285300  |
| H | -4.07851000 | 0.69625900  | 2.43365600  |
| H | -3.64946400 | 2.76376400  | -1.31610200 |
| C | -4.51600700 | 3.10784200  | 1.23921100  |
| H | -5.10632400 | 3.66665900  | 0.50144200  |
| H | -5.15963500 | 2.86176600  | 2.09342700  |
| H | -3.71523700 | 3.77256800  | 1.59893000  |
| H | -1.21250600 | 0.69530800  | 2.11571600  |
| C | 1.81634100  | -1.42272900 | 0.38216300  |
| C | 0.32059600  | -3.54447600 | 0.74630800  |
| H | 0.01004800  | -4.19874500 | -0.07742900 |
| H | 1.19796200  | -3.94781500 | 1.25661400  |
| H | -0.52288300 | -3.49871700 | 1.44806300  |

|   |             |             |             |
|---|-------------|-------------|-------------|
| C | 4.30333200  | -1.03186400 | 0.92208400  |
| H | 4.20059200  | -0.06739400 | 1.43961000  |
| H | 5.14010400  | -1.59251200 | 1.35302600  |
| H | 4.48954500  | -0.80557100 | -0.13669200 |
| C | 3.04734900  | -1.85406300 | 1.09872400  |
| C | 0.65414900  | -2.17967700 | 0.24310100  |
| O | 3.05417100  | -2.84642400 | 1.79316400  |
| O | -0.66688500 | 1.87816400  | 0.78308800  |
| O | -0.33835000 | 0.91240900  | 1.76137300  |
| H | -0.44706800 | 1.39388000  | -0.03695800 |

Thermal correction to Gibbs Free Energy= 0.30994

Esolv(RM062X) = -1619.7497503

**TS3'(S)**

|   |             |             |             |
|---|-------------|-------------|-------------|
| C | 0.95884400  | -0.16235300 | -0.18197100 |
| N | 0.36439200  | -0.66741900 | -1.45105700 |
| N | -0.65363400 | -1.53500400 | -0.94418400 |
| C | 2.16148900  | 0.69109300  | -0.45893500 |
| C | 3.05023800  | 0.37821100  | -1.49708400 |
| C | 2.42008200  | 1.82494200  | 0.31812500  |
| C | 4.18257700  | 1.15827900  | -1.72093600 |
| H | 2.82844900  | -0.48128000 | -2.13104800 |
| C | 3.55482000  | 2.60642600  | 0.09846600  |
| H | 1.71490100  | 2.09044900  | 1.11010000  |
| C | 4.44581600  | 2.27150300  | -0.91967200 |
| H | 4.86593600  | 0.89920700  | -2.53265200 |
| H | 3.74072100  | 3.48334800  | 0.72237700  |
| H | 5.33520100  | 2.87979800  | -1.09636100 |
| S | -2.20646700 | -1.04477500 | -1.18427000 |
| O | -2.38578300 | -0.77739900 | -2.60094900 |

|   |             |             |             |
|---|-------------|-------------|-------------|
| O | -3.08780400 | -1.99406800 | -0.51407600 |
| C | -2.34451500 | 0.53917000  | -0.37069400 |
| C | -2.87975100 | 0.61724700  | 0.91147300  |
| C | -1.80156000 | 1.65670700  | -1.00193700 |
| C | -2.87918600 | 1.84498000  | 1.56730100  |
| H | -3.25451800 | -0.29512400 | 1.37680700  |
| C | -1.79279500 | 2.87382100  | -0.32251500 |
| H | -1.37057000 | 1.54190800  | -1.99700700 |
| C | -2.33272000 | 2.98600400  | 0.96391800  |
| H | -3.29601800 | 1.92042900  | 2.57503200  |
| H | -1.35092100 | 3.75327800  | -0.79746600 |
| C | -2.35018300 | 4.31267500  | 1.67996900  |
| H | -1.56075100 | 4.97775100  | 1.30377700  |
| H | -3.31437100 | 4.82607900  | 1.53558200  |
| H | -2.20566100 | 4.18311700  | 2.76189600  |
| H | 0.24568700  | 0.40453900  | 0.44662800  |
| C | 1.21207500  | -1.58028100 | 0.36753800  |
| C | -0.33183400 | -3.67291600 | 0.23813200  |
| H | 0.24504800  | -4.04450800 | -0.61944500 |
| H | 0.04141600  | -4.13902800 | 1.15870800  |
| H | -1.39496200 | -3.90817500 | 0.09165000  |
| C | 3.33771700  | -1.19892400 | 1.75288000  |
| H | 3.14986100  | -0.18078900 | 2.12714800  |
| H | 3.91540200  | -1.75478700 | 2.50211800  |
| H | 3.90256300  | -1.09340400 | 0.81752100  |
| C | 2.01317400  | -1.91593600 | 1.54065700  |
| C | -0.20433000 | -2.15903300 | 0.33088600  |
| O | 1.66649600  | -2.76155000 | 2.36383100  |
| O | -0.97581100 | -1.68114600 | 1.42305600  |
| H | -0.49168300 | -1.99619900 | 2.20013500  |

|   |            |             |             |
|---|------------|-------------|-------------|
| H | 1.32590200 | -1.64963400 | -0.98899000 |
|---|------------|-------------|-------------|

Thermal correction to Gibbs Free Energy= 0.315587

Esolv(RM062X) = -1545.23211702

**TS3'(T)**

|   |             |             |             |
|---|-------------|-------------|-------------|
| C | 0.95953000  | -0.04575600 | -0.25612400 |
| N | 0.38841000  | -0.66613200 | -1.48105600 |
| N | -0.54477800 | -1.59017400 | -0.92483000 |
| C | 2.06275400  | 0.92818000  | -0.50471400 |
| C | 2.34337300  | 1.44830700  | -1.76952700 |
| C | 2.84568200  | 1.31508100  | 0.59372900  |
| C | 3.39321300  | 2.35462300  | -1.93749700 |
| H | 1.73039300  | 1.13223100  | -2.61506300 |
| C | 3.89083700  | 2.21839000  | 0.42076700  |
| H | 2.62408400  | 0.87315600  | 1.57057000  |
| C | 4.16763700  | 2.74154900  | -0.84544500 |
| H | 3.60674400  | 2.75921400  | -2.92929300 |
| H | 4.50004800  | 2.51254700  | 1.27802000  |
| H | 4.98976400  | 3.44788700  | -0.97895300 |
| S | -2.14692200 | -1.25908200 | -1.12433500 |
| O | -2.38150400 | -1.00064800 | -2.53385600 |
| O | -2.86503600 | -2.31300900 | -0.42757400 |
| C | -2.45012000 | 0.28143100  | -0.27654800 |
| C | -2.76691700 | 0.26911200  | 1.08040000  |
| C | -2.29128700 | 1.47316800  | -0.97706100 |
| C | -2.92646300 | 1.48396300  | 1.73839500  |
| H | -2.84615400 | -0.68798000 | 1.59619200  |
| C | -2.44741900 | 2.68028600  | -0.29804100 |
| H | -2.04636400 | 1.43644400  | -2.03943700 |
| C | -2.76214900 | 2.70239400  | 1.06466700  |



|   |             |             |             |
|---|-------------|-------------|-------------|
| H | -3.17153100 | 1.49041200  | 2.80319200  |
| H | -2.31906900 | 3.62267800  | -0.83534500 |
| C | -2.89113800 | 4.00629400  | 1.80862400  |
| H | -3.73547100 | 3.98135300  | 2.51211000  |
| H | -1.98075000 | 4.20952400  | 2.39365800  |
| H | -3.03949200 | 4.84733800  | 1.11810000  |
| H | 0.18007400  | 0.39058300  | 0.38881800  |
| C | 1.42217800  | -1.44163600 | 0.19202300  |
| C | 0.07993200  | -3.65569300 | 0.27265200  |
| H | 0.56404100  | -4.00374400 | -0.65040200 |
| H | 0.64207700  | -4.02300700 | 1.14248000  |
| H | -0.95540200 | -4.02019500 | 0.31138000  |
| C | 3.87562700  | -1.85648600 | 1.08582900  |
| H | 4.28650400  | -2.63763100 | 1.75200100  |
| H | 4.11301000  | -2.12679300 | 0.04552000  |
| H | 4.43514700  | -0.92578400 | 1.32509300  |
| C | 2.39680100  | -1.72076500 | 1.27434300  |
| C | 0.05698000  | -2.14134100 | 0.33137300  |
| O | 1.86944000  | -1.43080500 | 2.43615900  |
| O | -0.56255400 | -1.69961600 | 1.50058600  |
| H | 0.22946500  | -1.52121700 | 2.10145700  |
| H | 1.40115600  | -1.51155800 | -1.24911800 |

Thermal correction to Gibbs Free Energy= 0.31099

Esolv(UM062X) = -1545.14357229

#### Int4'(S)

|   |            |             |             |
|---|------------|-------------|-------------|
| C | 1.22561200 | 0.18468100  | -0.37820100 |
| N | 0.95699800 | -1.20449600 | -0.87671800 |
| N | 0.11768200 | -1.88543400 | 0.01828500  |
| C | 2.72675200 | 0.44577200  | -0.43963900 |

|   |             |             |             |
|---|-------------|-------------|-------------|
| C | 3.44944600  | 0.86620500  | 0.67914600  |
| C | 3.40822500  | 0.27267300  | -1.65321300 |
| C | 4.82291200  | 1.09885000  | 0.59160500  |
| H | 2.90271400  | 1.00194300  | 1.61529400  |
| C | 4.78012900  | 0.49938400  | -1.74234300 |
| H | 2.84525600  | -0.04531900 | -2.53521400 |
| C | 5.49373900  | 0.91475200  | -0.61668300 |
| H | 5.37366200  | 1.42629900  | 1.47602200  |
| H | 5.29542200  | 0.35597800  | -2.69454600 |
| H | 6.56825500  | 1.09673500  | -0.68342900 |
| S | -1.42018900 | -2.13021900 | -0.63588000 |
| O | -1.21649600 | -2.54144900 | -2.01763600 |
| O | -2.16967000 | -2.98506600 | 0.26337400  |
| C | -2.18585500 | -0.51812000 | -0.68682900 |
| C | -2.94162000 | -0.07512500 | 0.39424600  |
| C | -1.94468100 | 0.29711300  | -1.79058000 |
| C | -3.44020400 | 1.22336200  | 0.37584200  |
| H | -3.09155900 | -0.74283700 | 1.24236400  |
| C | -2.45376400 | 1.59334900  | -1.79218700 |
| H | -1.35623000 | -0.09747800 | -2.62034800 |
| C | -3.19793300 | 2.07503600  | -0.70797900 |
| H | -4.00173700 | 1.59258700  | 1.23642800  |
| H | -2.26579800 | 2.24798500  | -2.64698400 |
| C | -3.69177400 | 3.49836000  | -0.68274600 |
| H | -3.72322200 | 3.93026600  | -1.69253600 |
| H | -4.69762700 | 3.56445200  | -0.24438400 |
| H | -3.02527200 | 4.12614800  | -0.06957200 |
| H | 0.75895700  | 0.89912200  | -1.08350200 |
| C | 0.54573200  | 0.22823700  | 0.95435200  |
| C | 1.42998500  | -1.90499900 | 2.06347900  |

|   |             |             |             |
|---|-------------|-------------|-------------|
| H | 2.33375400  | -1.89118700 | 1.43445400  |
| H | 1.64571200  | -1.37952500 | 3.00462300  |
| H | 1.14422100  | -2.94485400 | 2.27851600  |
| C | 0.04542800  | 2.69108900  | 0.98491300  |
| H | -0.93739500 | 3.06579000  | 0.65845200  |
| H | 0.38390100  | 3.34091100  | 1.80650600  |
| H | 0.76283000  | 2.76229700  | 0.15576000  |
| C | -0.13448600 | 1.28244200  | 1.52610700  |
| C | 0.25517000  | -1.19740100 | 1.38210200  |
| O | -0.94475900 | 1.16240400  | 2.51003100  |
| O | -0.87358800 | -1.30760400 | 2.15315900  |
| H | -1.05924300 | -0.34339300 | 2.45672400  |
| H | 1.82287900  | -1.73315000 | -0.95130400 |

Thermal correction to Gibbs Free Energy= 0.321711

Esolv(RM062X) = -1545.32223232

#### Int4'(T)

|   |             |             |             |
|---|-------------|-------------|-------------|
| C | 1.15127500  | -0.02541000 | -0.28463400 |
| N | 0.36789200  | -0.40076400 | -1.46344900 |
| N | -0.43107000 | -1.48927400 | -1.02252400 |
| C | 2.36608400  | 0.80274400  | -0.55381300 |
| C | 2.79398200  | 1.15449600  | -1.83584600 |
| C | 3.11392500  | 1.22728300  | 0.55877500  |
| C | 3.96676100  | 1.89256900  | -2.01407300 |
| H | 2.19893300  | 0.87020200  | -2.70590800 |
| C | 4.28451300  | 1.95826200  | 0.37548300  |
| H | 2.74519300  | 0.97839800  | 1.55796200  |
| C | 4.72013600  | 2.28814900  | -0.91044800 |
| H | 4.28792800  | 2.16249900  | -3.02230700 |
| H | 4.86135500  | 2.27878600  | 1.24558000  |

|   |             |             |             |
|---|-------------|-------------|-------------|
| H | 5.63869300  | 2.86187300  | -1.04947300 |
| S | -2.05356800 | -1.21552300 | -1.28042600 |
| O | -2.21228500 | -0.90622800 | -2.69283800 |
| O | -2.77002800 | -2.33338800 | -0.68927200 |
| C | -2.46592200 | 0.27556700  | -0.39327300 |
| C | -2.96459100 | 0.18946800  | 0.90472400  |
| C | -2.25316100 | 1.50363900  | -1.01179100 |
| C | -3.25443400 | 1.36485600  | 1.58823800  |
| H | -3.08508100 | -0.79475200 | 1.35688100  |
| C | -2.53774300 | 2.67156400  | -0.30535000 |
| H | -1.86744100 | 1.52422300  | -2.03104500 |
| C | -3.03784500 | 2.61860100  | 0.99939000  |
| H | -3.64367800 | 1.31242600  | 2.60783100  |
| H | -2.36710100 | 3.64242400  | -0.77630800 |
| C | -3.31009800 | 3.88019700  | 1.77697300  |
| H | -4.24849100 | 3.80323600  | 2.34458300  |
| H | -2.50238200 | 4.06984300  | 2.50090700  |
| H | -3.37670400 | 4.75270200  | 1.11312600  |
| H | 0.48048900  | 0.54815800  | 0.38818100  |
| C | 1.40113500  | -1.35353400 | 0.43942300  |
| C | 0.10243300  | -3.56476200 | 0.21372600  |
| H | 0.68875000  | -3.89140500 | -0.65672700 |
| H | 0.57253600  | -3.93669700 | 1.13514300  |
| H | -0.92420600 | -3.94712600 | 0.13632400  |
| C | 3.41003300  | -1.82319100 | 2.06477900  |
| H | 3.45494300  | -2.53070700 | 2.91513500  |
| H | 3.85891000  | -2.31016000 | 1.18509600  |
| H | 4.06657600  | -0.97165500 | 2.34907900  |
| C | 2.00081400  | -1.39837900 | 1.78230000  |
| C | 0.05175200  | -2.05005000 | 0.29104900  |

|   |             |             |             |
|---|-------------|-------------|-------------|
| O | 1.27562700  | -0.79529900 | 2.68925600  |
| O | -0.75151700 | -1.64027100 | 1.35605200  |
| H | -0.11179400 | -1.22309600 | 2.03590300  |
| H | 1.00324900  | -0.79146400 | -2.16071100 |

Thermal correction to Gibbs Free Energy= 0.316825

Esolv(UM062X) = -1545.21384216

**Int1''**

|   |             |             |             |
|---|-------------|-------------|-------------|
| C | 0.65148300  | -1.48848400 | -1.35744600 |
| N | -0.37602900 | -0.75160000 | -1.18903800 |
| N | -0.64151900 | 0.17195800  | -0.34063500 |
| C | 1.85296800  | -1.55730400 | -0.51385600 |
| C | 1.97255200  | -0.91081100 | 0.72561600  |
| C | 2.91898000  | -2.33820000 | -0.98660300 |
| C | 3.14366300  | -1.04615700 | 1.46542900  |
| H | 1.16172300  | -0.30115300 | 1.12359800  |
| C | 4.08885400  | -2.46316600 | -0.24773700 |
| H | 2.82654400  | -2.84164900 | -1.95120400 |
| C | 4.20156600  | -1.81729200 | 0.98324900  |
| H | 3.22605500  | -0.54116800 | 2.42913100  |
| H | 4.91397500  | -3.06393400 | -0.63166700 |
| H | 5.11564800  | -1.91825100 | 1.57109800  |
| S | -1.57087200 | -0.37040500 | 1.00555200  |
| O | -1.32731200 | -1.78669900 | 1.21743900  |
| O | -1.27561800 | 0.61568100  | 2.03045500  |
| C | -3.23437800 | -0.15031300 | 0.45024000  |
| C | -3.85199700 | 1.08512500  | 0.62905400  |
| C | -3.88150400 | -1.21235000 | -0.17715500 |
| C | -5.15093000 | 1.25407100  | 0.16062400  |
| H | -3.31680700 | 1.88861500  | 1.13677500  |

|   |             |             |             |
|---|-------------|-------------|-------------|
| C | -5.17966300 | -1.02136600 | -0.63915900 |
| H | -3.36849300 | -2.16883400 | -0.28649200 |
| C | -5.83156200 | 0.20860100  | -0.47770000 |
| H | -5.64961800 | 2.21622800  | 0.29348000  |
| H | -5.70089700 | -1.84375900 | -1.13323300 |
| C | -7.24815400 | 0.39210800  | -0.95141800 |
| H | -7.44955800 | 1.43980100  | -1.20996400 |
| H | -7.45802900 | -0.23134600 | -1.83037800 |
| H | -7.95743700 | 0.10182800  | -0.16090300 |
| H | 0.62565000  | -2.13524300 | -2.24048600 |
| C | 3.27374300  | 2.21089800  | 0.15951400  |
| C | 0.87986600  | 3.02009300  | 0.10107900  |
| H | 1.21854100  | 3.79081200  | 0.80230400  |
| H | 0.34064600  | 3.47711000  | -0.73941900 |
| H | 0.17814600  | 2.34049300  | 0.60955800  |
| C | 5.64220300  | 1.31026400  | 0.30362500  |
| H | 6.25885500  | 0.52447000  | -0.14692100 |
| H | 6.14130200  | 2.28421700  | 0.18835200  |
| H | 5.51802900  | 1.12671500  | 1.38039500  |
| C | 4.29850700  | 1.34906200  | -0.37972400 |
| C | 2.02810000  | 2.22294200  | -0.42125600 |
| O | 4.10184100  | 0.64964400  | -1.38320200 |
| O | 1.76246600  | 1.48794700  | -1.47590600 |
| H | 2.62233100  | 0.99544300  | -1.68926800 |
| H | 3.47337200  | 2.82467400  | 1.03558200  |

Thermal correction to Gibbs Free Energy= 0.311284

Esolv(UM062X) = -1545.1431999

**TS1''**

|   |            |             |             |
|---|------------|-------------|-------------|
| C | 0.80597800 | -1.82778800 | -0.94865300 |
|---|------------|-------------|-------------|

|   |             |             |             |
|---|-------------|-------------|-------------|
| N | -0.21707200 | -1.09279900 | -0.74331200 |
| N | -0.17629900 | 0.14401300  | -0.24306500 |
| C | 2.18522100  | -1.64855800 | -0.44398600 |
| C | 2.38578500  | -1.30036300 | 0.89987600  |
| C | 3.28117800  | -1.97210300 | -1.25017700 |
| C | 3.67806400  | -1.26741500 | 1.41683600  |
| H | 1.52327900  | -1.08217100 | 1.53442300  |
| C | 4.57294300  | -1.91430600 | -0.73236900 |
| H | 3.11863400  | -2.26394000 | -2.29011500 |
| C | 4.77163500  | -1.56523000 | 0.60170800  |
| H | 3.83198700  | -1.01524900 | 2.46750100  |
| H | 5.42568900  | -2.15032100 | -1.37007800 |
| H | 5.78245400  | -1.53295500 | 1.01159600  |
| S | -1.11136900 | 0.35657100  | 1.13913900  |
| O | -0.74475400 | -0.65611000 | 2.11661000  |
| O | -1.02457300 | 1.77088600  | 1.46942200  |
| C | -2.75804800 | 0.00547900  | 0.58242400  |
| C | -3.57914200 | 1.05748100  | 0.18992900  |
| C | -3.19477800 | -1.31820600 | 0.54483600  |
| C | -4.86571000 | 0.77068200  | -0.26144200 |
| H | -3.21560100 | 2.08364700  | 0.25723400  |
| C | -4.47988800 | -1.58307300 | 0.08784700  |
| H | -2.53099100 | -2.11571700 | 0.87978900  |
| C | -5.33146200 | -0.54712400 | -0.32377900 |
| H | -5.52329200 | 1.58732300  | -0.56537100 |
| H | -4.83634600 | -2.61483200 | 0.05352100  |
| C | -6.71832600 | -0.86084300 | -0.81731100 |
| H | -7.27684200 | 0.05388200  | -1.05201600 |
| H | -6.67681200 | -1.47955400 | -1.72582200 |
| H | -7.28360700 | -1.42538700 | -0.06182000 |

|   |             |             |             |
|---|-------------|-------------|-------------|
| H | 0.59250200  | -2.75704100 | -1.49156500 |
| C | 1.61625200  | 1.89442700  | 0.00880900  |
| C | -0.35132000 | 2.38592500  | -1.54587500 |
| H | 0.05644700  | 3.23804700  | -2.11044800 |
| H | -1.01215900 | 1.80623600  | -2.20245600 |
| H | -0.89683200 | 2.75420400  | -0.67100900 |
| C | 3.84279600  | 2.10187700  | 1.18607300  |
| H | 4.85343200  | 1.68429100  | 1.11575300  |
| H | 3.89970300  | 3.20080300  | 1.17744300  |
| H | 3.36984100  | 1.79930800  | 2.13058400  |
| C | 3.02603700  | 1.62725200  | 0.01085200  |
| C | 0.80888400  | 1.53009500  | -1.12785000 |
| O | 3.58352300  | 1.05888100  | -0.94339100 |
| O | 1.39226600  | 0.89598600  | -2.12349100 |
| H | 2.36068200  | 0.75884700  | -1.85226000 |
| H | 1.14502400  | 2.44054000  | 0.82385100  |

Thermal correction to Gibbs Free Energy= 0.31435

Esolv(UM062X) = -1545.10109285

### Int2''

|   |             |             |             |
|---|-------------|-------------|-------------|
| C | 0.94241200  | -2.07105700 | -0.61990800 |
| N | -0.13837600 | -1.40878200 | -0.49032000 |
| N | 0.02850700  | -0.10387200 | 0.00640600  |
| C | 2.31517000  | -1.69300300 | -0.20584300 |
| C | 2.55231600  | -1.15120000 | 1.06713400  |
| C | 3.39074200  | -1.94353900 | -1.06308700 |
| C | 3.85461400  | -0.84953800 | 1.45735900  |
| H | 1.71051900  | -0.98719100 | 1.74233900  |
| C | 4.68851600  | -1.61348500 | -0.67716100 |
| H | 3.20530700  | -2.37997100 | -2.04713000 |



|   |             |             |             |
|---|-------------|-------------|-------------|
| C | 4.92137000  | -1.06547600 | 0.58255500  |
| H | 4.03845000  | -0.44595200 | 2.45474600  |
| H | 5.51980500  | -1.78659500 | -1.36157100 |
| H | 5.93823700  | -0.81423400 | 0.88836800  |
| S | -1.06504300 | 0.20946900  | 1.23437300  |
| O | -0.84521200 | -0.83775700 | 2.21355800  |
| O | -0.89094200 | 1.61359100  | 1.58449400  |
| C | -2.70598200 | -0.00104100 | 0.58796000  |
| C | -3.50914500 | 1.11933400  | 0.39621000  |
| C | -3.17696300 | -1.28795500 | 0.31923100  |
| C | -4.79852000 | 0.94844600  | -0.10306700 |
| H | -3.12698800 | 2.10769300  | 0.65461100  |
| C | -4.46321500 | -1.43567400 | -0.18573800 |
| H | -2.53648000 | -2.14878000 | 0.50638800  |
| C | -5.29012900 | -0.32496800 | -0.40865000 |
| H | -5.43788400 | 1.82108700  | -0.25003900 |
| H | -4.84109100 | -2.43671800 | -0.40459900 |
| C | -6.67536800 | -0.51176100 | -0.96685500 |
| H | -7.25105100 | 0.42169900  | -0.93101700 |
| H | -6.62867300 | -0.84250300 | -2.01534400 |
| H | -7.22540400 | -1.27981600 | -0.40506100 |
| H | 0.81415000  | -3.06122000 | -1.07660400 |
| C | 1.45352200  | 1.82001100  | -0.18304800 |
| C | -0.68370700 | 1.78405100  | -1.51975700 |
| H | -0.29888400 | 2.49086100  | -2.26715700 |
| H | -1.38427500 | 1.09490000  | -2.01226900 |
| H | -1.19409900 | 2.33520400  | -0.72248500 |
| C | 3.71149400  | 2.64887300  | 0.58721300  |
| H | 4.77151900  | 2.55073800  | 0.32853800  |
| H | 3.41244800  | 3.70651200  | 0.54769000  |

|   |            |            |             |
|---|------------|------------|-------------|
| H | 3.54188500 | 2.29359200 | 1.61386600  |
| C | 2.88801500 | 1.83572200 | -0.38112000 |
| C | 0.49558200 | 0.97643700 | -0.98903200 |
| O | 3.42709100 | 1.21590500 | -1.30014000 |
| O | 1.08868800 | 0.34234900 | -2.05311200 |
| H | 2.06299600 | 0.43012400 | -1.96834700 |
| H | 1.01791700 | 2.38988000 | 0.63772500  |

Thermal correction to Gibbs Free Energy= 0.317107

Esolv(UM062X) = -1545.12508728

**Ts2''**

|   |             |             |             |
|---|-------------|-------------|-------------|
| C | 1.63210900  | 0.62193900  | -1.29320500 |
| N | 0.49309800  | -0.00009200 | -1.13563700 |
| N | 0.38422800  | -0.60488700 | 0.06258600  |
| C | 2.97606000  | 0.14285600  | -0.85517300 |
| C | 3.20742800  | -1.22377900 | -0.64326500 |
| C | 4.05350200  | 1.03471900  | -0.80005400 |
| C | 4.49103200  | -1.67504500 | -0.34698100 |
| H | 2.37545700  | -1.92647000 | -0.71288100 |
| C | 5.33425000  | 0.58078800  | -0.49423500 |
| H | 3.88469500  | 2.09699900  | -0.99525300 |
| C | 5.55511100  | -0.77636900 | -0.26095500 |
| H | 4.66049500  | -2.74064300 | -0.18648300 |
| H | 6.16329500  | 1.28805000  | -0.44400600 |
| H | 6.55735200  | -1.13502100 | -0.02286400 |
| S | -0.80998800 | -1.83577700 | 0.07860000  |
| O | -0.52963600 | -2.61129200 | -1.11127400 |
| O | -0.75351000 | -2.42199700 | 1.40089500  |
| C | -2.35421100 | -1.00343100 | -0.14815000 |
| C | -3.16148500 | -0.75604700 | 0.96047300  |

|   |             |             |             |
|---|-------------|-------------|-------------|
| C | -2.72628200 | -0.61593900 | -1.43307400 |
| C | -4.36594500 | -0.08919500 | 0.76855600  |
| H | -2.82825800 | -1.07804100 | 1.94774300  |
| C | -3.93299600 | 0.05771400  | -1.59970300 |
| H | -2.07596700 | -0.84610400 | -2.27714600 |
| C | -4.76442600 | 0.33358100  | -0.50776300 |
| H | -5.01375300 | 0.10755300  | 1.62529900  |
| H | -4.23908700 | 0.37117900  | -2.59963700 |
| C | -6.05161700 | 1.09123900  | -0.69206700 |
| H | -6.82556200 | 0.73543300  | 0.00108000  |
| H | -5.89580500 | 2.16291400  | -0.49356900 |
| H | -6.42959900 | 0.99338900  | -1.71793200 |
| H | 1.64140800  | 1.33048600  | -2.13117000 |
| C | 1.19917800  | 1.57553500  | 0.80629000  |
| C | 1.51842200  | -0.44158600 | 2.28605200  |
| H | 1.61982700  | 0.18272500  | 3.18345700  |
| H | 1.05956600  | -1.39843600 | 2.56113200  |
| H | 2.50626500  | -0.61494000 | 1.84084400  |
| C | 0.99532700  | 3.98050400  | 0.02594900  |
| H | 0.25786700  | 4.64671300  | -0.43459200 |
| H | 1.38392000  | 4.44445000  | 0.94478600  |
| H | 1.84549600  | 3.83099500  | -0.65492100 |
| C | 0.33451000  | 2.66385600  | 0.36325200  |
| C | 0.60242800  | 0.26761800  | 1.30290600  |
| O | -0.87619100 | 2.51630200  | 0.24594000  |
| O | -0.61468900 | 0.47071900  | 1.92925600  |
| H | -1.11997700 | 1.10651300  | 1.38549700  |
| H | 2.22872100  | 1.80594200  | 1.08272500  |

Thermal correction to Gibbs Free Energy= 0.317587

Esolv(UM062X) = -1545.11001032

**Int3''**

|   |             |             |             |
|---|-------------|-------------|-------------|
| C | 1.64294200  | 0.82639800  | -0.76505800 |
| N | 0.64449600  | -0.19023700 | -1.02978400 |
| N | 0.28563500  | -0.63185000 | 0.17299600  |
| C | 3.04918800  | 0.23720700  | -0.70394200 |
| C | 3.26629400  | -1.13440900 | -0.85824200 |
| C | 4.14243800  | 1.08565900  | -0.50016900 |
| C | 4.56258500  | -1.64716500 | -0.78929900 |
| H | 2.41566900  | -1.79707400 | -1.02597600 |
| C | 5.43528500  | 0.57263400  | -0.43541100 |
| H | 3.98210500  | 2.16228400  | -0.39109000 |
| C | 5.64759000  | -0.79939400 | -0.57698200 |
| H | 4.72175200  | -2.72029000 | -0.90476500 |
| H | 6.27970800  | 1.24478700  | -0.27545800 |
| H | 6.65893800  | -1.20487400 | -0.52412100 |
| S | -0.86494300 | -1.89320600 | 0.21219900  |
| O | -0.54281900 | -2.75154700 | -0.90388500 |
| O | -0.87153200 | -2.37182800 | 1.57803400  |
| C | -2.38183000 | -1.04984100 | -0.12764200 |
| C | -3.23206800 | -0.72928700 | 0.92667100  |
| C | -2.66640400 | -0.69070700 | -1.44424600 |
| C | -4.39770900 | -0.02113100 | 0.64684800  |
| H | -2.96547300 | -1.02859600 | 1.94127500  |
| C | -3.83346900 | 0.02077800  | -1.69828200 |
| H | -1.97700400 | -0.96984900 | -2.24234500 |
| C | -4.71097200 | 0.36801000  | -0.66152600 |
| H | -5.08037600 | 0.23303000  | 1.46009500  |
| H | -4.07340800 | 0.31109900  | -2.72320900 |

|   |             |             |             |
|---|-------------|-------------|-------------|
| C | -5.95372100 | 1.16531100  | -0.95284800 |
| H | -6.69008200 | 1.06813500  | -0.14486900 |
| H | -5.70773700 | 2.23326500  | -1.05713100 |
| H | -6.42171200 | 0.84127400  | -1.89224000 |
| H | 1.61392100  | 1.55521100  | -1.59118400 |
| C | 1.20162200  | 1.47112400  | 0.58526200  |
| C | 1.47470600  | -0.37480900 | 2.34030700  |
| H | 1.64621200  | 0.31845200  | 3.17466200  |
| H | 0.99255500  | -1.28464000 | 2.71814400  |
| H | 2.43183600  | -0.63003200 | 1.86713100  |
| C | 0.86937900  | 3.95690600  | 0.03040400  |
| H | 0.13920600  | 4.63702200  | -0.42117000 |
| H | 1.18298100  | 4.34973500  | 1.00988100  |
| H | 1.76989600  | 3.88671700  | -0.59654300 |
| C | 0.24721500  | 2.59962300  | 0.23622300  |
| C | 0.54006600  | 0.28232100  | 1.34119800  |
| O | -0.93906200 | 2.41215900  | 0.08553000  |
| O | -0.63093300 | 0.59149400  | 2.00518000  |
| H | -1.19749100 | 1.09970600  | 1.40002600  |
| H | 2.06261700  | 1.86296700  | 1.14276300  |

Thermal correction to Gibbs Free Energy= 0.320949

Esolv(UM062X) = -1545.17231943

## 8. Characterization data of products

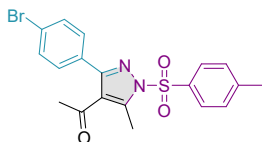

### 1-(3-(4-bromophenyl)-5-methyl-1-tosyl-1H-pyrazol-4-yl)ethan-1-one (4a)

petroleum ether/ ethyl acetate = 8:1, white solid, 82% yield.

$^1\text{H NMR}$  (400 MHz,  $\text{DMSO-}d_6$ )  $\delta$  7.96 (d,  $J = 8.1$  Hz, 2H), 7.66 (d,  $J = 8.5$  Hz, 2H), 7.50 (d,  $J = 8.1$  Hz, 2H), 7.40 (d,  $J = 8.4$  Hz, 2H), 2.73 (s, 3H), 2.40 (s, 3H), 2.13 (s, 3H).

$^{13}\text{C NMR}$  (100 MHz,  $\text{DMSO-}d_6$ )  $\delta$  195.0, 152.7, 146.7, 146.1, 133.4, 131.5, 130.9, 130.7, 130.6, 127.9, 122.9, 122.2, 31.1, 21.2, 12.0.

**HRMS** (ESI-TOF): Anal Calcd. For.  $\text{C}_{19}\text{H}_{17}^{79}\text{BrN}_2\text{O}_3\text{S}[\text{M}+\text{H}]^+$ : 433.0217, Found:433.0219 . Anal Calcd. For.  $\text{C}_{19}\text{H}_{17}^{81}\text{BrN}_2\text{O}_3\text{S}[\text{M}+\text{H}]^+$ : 435.0196, Found:435.0218 .

**IR** (neat,  $\text{cm}^{-1}$ ):  $\nu$  2361, 2341, 1674, 1529, 1412, 1312, 1190, 1179, 1111, 1081, 1014, 840, 829, 817, 705, 688, 673, 656, 611.

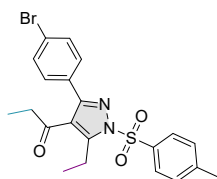

### 1-(3-(4-bromophenyl)-5-ethyl-1-tosyl-1H-pyrazol-4-yl)propan-1-one (4b)

petroleum ether/ ethyl acetate = 10:1, white solid, 76% yield.

$^1\text{H NMR}$  (400 MHz,  $\text{DMSO-}d_6$ )  $\delta$  7.96 (d,  $J = 8.5$  Hz, 2H), 7.67 (d,  $J = 8.5$  Hz, 2H), 7.51 (d,  $J = 8.2$  Hz, 2H), 7.38 (d,  $J = 8.5$  Hz, 2H), 3.10 (q,  $J = 7.3$  Hz, 2H), 2.44 – 2.36 (m, 5H), 1.24 (t,  $J = 7.3$  Hz, 3H), 0.88 (t,  $J = 7.2$  Hz, 3H).

$^{13}\text{C NMR}$  (100 MHz,  $\text{DMSO-}d_6$ )  $\delta$  198.6, 152.3, 151.1, 146.7, 133.5, 131.7, 130.7, 130.6, 128.0, 123.0, 121.5, 36.1, 21.2, 18.8, 14.7, 8.0.

**HRMS** (ESI-TOF): Anal Calcd. For.  $\text{C}_{21}\text{H}_{21}^{79}\text{BrN}_2\text{O}_3\text{S}[\text{M}+\text{H}]^+$ : 461.0530, Found: 461.0538. Anal Calcd. For.  $\text{C}_{21}\text{H}_{21}^{81}\text{BrN}_2\text{O}_3\text{S}[\text{M}+\text{H}]^+$ : 463.0509, Found: 463.0541.

**IR** (neat,  $\text{cm}^{-1}$ ):  $\nu$  2978, 1673, 1380, 1195, 1178, 1095, 1071, 838, 811, 675.

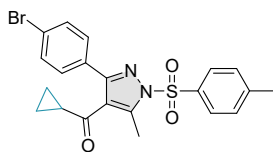

### (3-(4-bromophenyl)-5-methyl-1-tosyl-1H-pyrazol-4-yl)(cyclopropyl)methanone (4c)

petroleum ether/ ethyl acetate = 10:1, white solid, 50% yield.

$^1\text{H NMR}$  (400 MHz,  $\text{Chloroform-}d$ )  $\delta$  7.93 (d,  $J = 8.3$  Hz, 2H), 7.54 (d,  $J = 8.5$  Hz, 2H), 7.45 (d,  $J = 8.5$  Hz, 2H), 7.35 (d,  $J = 8.1$  Hz, 2H), 2.72 (s, 3H), 2.43 (s, 3H), 1.79 – 1.70 (m, 1H), 1.21 – 1.14 (m, 2H), 0.84 – 0.76 (m, 2H).

$^{13}\text{C}$  NMR (100 MHz, Chloroform-*d*)  $\delta$  198.8, 152.9, 146.2, 145.7, 134.4, 131.5, 130.6, 130.6, 130.1, 128.2, 123.7, 122.8, 22.8, 21.7, 13.5, 12.0.

HRMS (ESI-TOF): Anal Calcd. For  $\text{C}_{21}\text{H}_{19}^{79}\text{BrN}_2\text{O}_3\text{S}[\text{M}+\text{H}]^+$ : 459.0373, Found: 459.0368. Anal Calcd. For  $\text{C}_{21}\text{H}_{19}^{81}\text{BrN}_2\text{O}_3\text{S}[\text{M}+\text{H}]^+$ : 461.0353, Found: 461.0318.

IR (neat,  $\text{cm}^{-1}$ ):  $\nu$  2922, 1667, 1389, 1373, 1192, 1177, 1101, 1084, 1069, 1009, 961, 837, 811, 702, 681, 665.

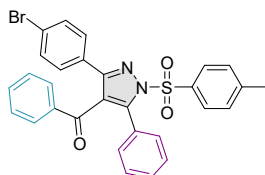

**(3-(4-bromophenyl)-5-phenyl-1-tosyl-1H-pyrazol-4-yl)(phenyl)methanone (4d)**

petroleum ether/ ethyl acetate = 8:1, white solid, 71% yield.

$^1\text{H}$  NMR (400 MHz, Chloroform-*d*)  $\delta$  7.62 (d,  $J$  = 8.4 Hz, 2H), 7.61 – 7.54 (m, 2H), 7.46 (d,  $J$  = 8.6 Hz, 2H), 7.38 (d,  $J$  = 8.6 Hz, 2H), 7.38 – 7.34 (m, 1H), 7.33 – 7.26 (m, 4H), 7.25 – 7.17 (m, 5H), 2.39 (s, 3H).

$^{13}\text{C}$  NMR (100 MHz, Chloroform-*d*)  $\delta$  191.6, 152.3, 147.5, 146.1, 136.6, 134.1, 133.6, 131.6, 130.5, 129.8, 129.8, 129.6, 129.6, 129.5, 128.3, 128.2, 127.6, 127.2, 123.6, 122.6, 21.7.

HRMS (ESI-TOF): Anal Calcd. For  $\text{C}_{29}\text{H}_{21}^{79}\text{BrN}_2\text{O}_3\text{S}[\text{M}+\text{H}]^+$ : 557.0530, Found: 557.0522. Anal Calcd. For  $\text{C}_{29}\text{H}_{21}^{81}\text{BrN}_2\text{O}_3\text{S}[\text{M}+\text{H}]^+$ : 559.0509, Found: 559.0533.

IR (neat,  $\text{cm}^{-1}$ ):  $\nu$  1661, 1423, 1390, 1192, 1173, 1132, 1010, 914, 828, 699, 677, 664.

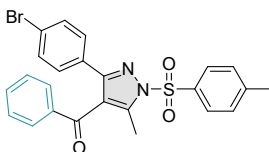

**(3-(4-bromophenyl)-5-methyl-1-tosyl-1H-pyrazol-4-yl)(phenyl)methanone (4e)**

petroleum ether/ ethyl acetate = 8:1, white solid, 71% yield.

$^1\text{H}$  NMR (400 MHz, Chloroform-*d*)  $\delta$  7.96 (d,  $J$  = 8.4 Hz, 2H), 7.72 – 7.64 (m, 2H), 7.52 – 7.46 (m, 1H), 7.39 – 7.24 (m, 8H), 2.56 (s, 3H), 2.44 (s, 3H).

$^{13}\text{C}$  NMR (100 MHz, Chloroform-*d*)  $\delta$  191.7, 152.6, 146.2, 145.4, 134.3, 133.7, 131.3, 130.1, 129.8, 129.8, 129.6, 128.6, 128.2, 123.2, 120.8, 21.7, 12.3.

HRMS (ESI-TOF): Anal Calcd. For  $\text{C}_{24}\text{H}_{19}^{79}\text{BrN}_2\text{O}_3\text{S}[\text{M}+\text{H}]^+$ : 495.0373, Found: 495.0373. Anal Calcd. For  $\text{C}_{24}\text{H}_{19}^{81}\text{BrN}_2\text{O}_3\text{S}[\text{M}+\text{H}]^+$ : 497.0353, Found: 497.0415.

IR (neat,  $\text{cm}^{-1}$ ):  $\nu$  2919, 1651, 1375, 1190, 1176, 1083, 1010, 914, 833, 744, 673, 603.

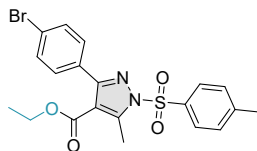

**ethyl 3-(4-bromophenyl)-5-methyl-1-tosyl-1H-pyrazole-4-carboxylate (4f)**

petroleum ether/ ethyl acetate = 8:1, white solid, 55% yield.

$^1\text{H}$  NMR (400 MHz, DMSO-*d*<sub>6</sub>)  $\delta$  7.96 (d,  $J$  = 8.4 Hz, 2H), 7.61 (d,  $J$  = 8.5 Hz, 2H), 7.50 (d,  $J$  = 8.2 Hz, 2H), 7.44 (d,  $J$  = 8.5 Hz, 2H), 4.13 (q,  $J$  = 7.1 Hz, 2H), 2.80 (s, 3H), 2.39 (s, 3H), 1.09 (t,  $J$  = 7.1 Hz, 3H).

$^{13}\text{C}$  NMR (100 MHz, DMSO- $d_6$ )  $\delta$  162.1, 153.3, 148.3, 146.8, 133.3, 131.0, 130.9, 130.6, 130.4, 128.0, 122.7, 113.1, 60.6, 21.2, 13.7, 12.0.

HRMS (ESI-TOF): Anal Calcd. For  $\text{C}_{20}\text{H}_{19}^{79}\text{BrN}_2\text{O}_4\text{S}[\text{M}+\text{H}]^+$ : 463.0322, Found: 463.0321. Anal Calcd. For  $\text{C}_{20}\text{H}_{19}^{81}\text{BrN}_2\text{O}_4\text{S}[\text{M}+\text{H}]^+$ : 465.0302, Found: 465.0295.

IR (neat,  $\text{cm}^{-1}$ ):  $\nu$  2977, 1705, 1492, 1448, 1300, 1158, 1120, 1097, 1070, 1009, 820, 785, 680.

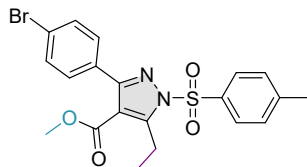

**methyl 3-(4-bromophenyl)-5-ethyl-1-tosyl-1H-pyrazole-4-carboxylate (4g)**

petroleum ether/ ethyl acetate = 10:1, white solid, 45% yield.

$^1\text{H}$  NMR (400 MHz, DMSO- $d_6$ )  $\delta$  7.96 (d,  $J$  = 8.3 Hz, 2H), 7.61 (d,  $J$  = 8.5 Hz, 2H), 7.50 (d,  $J$  = 8.2 Hz, 2H), 7.45 (d,  $J$  = 8.5 Hz, 2H), 3.67 (s, 3H), 3.25 (q,  $J$  = 7.3 Hz, 2H), 2.40 (s, 3H), 1.25 (t,  $J$  = 7.4 Hz, 3H).

$^{13}\text{C}$  NMR (100 MHz, DMSO- $d_6$ )  $\delta$  162.4, 153.9, 153.2, 146.8, 133.4, 131.0, 130.9, 130.6, 130.3, 128.0, 122.7, 112.2, 51.7, 21.2, 19.0, 14.4.

HRMS (ESI-TOF): Anal Calcd. For  $\text{C}_{20}\text{H}_{19}^{79}\text{BrN}_2\text{O}_4\text{S}[\text{M}+\text{H}]^+$ : 463.0322, Found: 463.0319. Anal Calcd. For  $\text{C}_{20}\text{H}_{19}^{81}\text{BrN}_2\text{O}_4\text{S}[\text{M}+\text{H}]^+$ : 465.0302, Found: 465.0301.

IR (neat,  $\text{cm}^{-1}$ ):  $\nu$  2955, 1717, 1548, 1389, 1293, 1190, 1123, 1071, 1017, 1002, 837, 811, 703, 675.

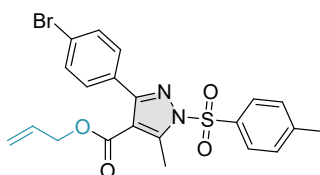

**allyl 3-(4-bromophenyl)-5-methyl-1-tosyl-1H-pyrazole-4-carboxylate (4h)**

petroleum ether/ ethyl acetate = 10:1, white solid, 41% yield.

$^1\text{H}$  NMR (400 MHz, DMSO- $d_6$ )  $\delta$  7.96 (d,  $J$  = 8.3 Hz, 2H), 7.60 (d,  $J$  = 8.4 Hz, 2H), 7.50 (d,  $J$  = 8.1 Hz, 2H), 7.44 (d,  $J$  = 8.5 Hz, 2H), 5.89 – 5.76 (m, 1H), 5.18 – 5.04 (m, 2H), 4.67 – 4.60 (m, 2H), 2.81 (s, 3H), 2.39 (s, 3H).

$^{13}\text{C}$  NMR (100 MHz, DMSO- $d_6$ )  $\delta$  161.8, 153.4, 148.5, 146.8, 133.3, 131.9, 131.0, 131.0, 130.6, 130.4, 128.0, 122.7, 118.3, 112.8, 65.1, 21.2, 12.1.

HRMS (ESI-TOF): Anal Calcd. For  $\text{C}_{21}\text{H}_{19}^{79}\text{BrN}_2\text{O}_4\text{S}[\text{M}+\text{H}]^+$ : 475.0322, Found: 475.0324. Anal Calcd. For  $\text{C}_{21}\text{H}_{19}^{81}\text{BrN}_2\text{O}_4\text{S}[\text{M}+\text{H}]^+$ : 477.0302, Found: 477.0289.

IR (neat,  $\text{cm}^{-1}$ ):  $\nu$  2921, 1709, 1552, 1393, 1315, 1174, 1134, 1013, 922, 832, 703, 687, 668.

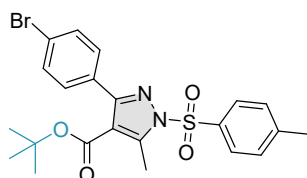

**tert-butyl 3-(4-bromophenyl)-5-methyl-1-tosyl-1H-pyrazole-4-carboxylate (4i)**

petroleum ether/ ethyl acetate = 10:1, white solid, 51% yield.



**<sup>1</sup>H NMR** (400 MHz, Chloroform-*d*) δ 7.92 (d, *J* = 8.0 Hz, 2H), 7.50 (d, *J* = 8.1 Hz, 2H), 7.40 – 7.32 (m, 4H), 2.83 (s, 3H), 2.44 (s, 3H), 1.37 (s, 9H).

**<sup>13</sup>C NMR** (100 MHz, Chloroform-*d*) δ 162.2, 154.1, 147.9, 146.2, 134.4, 131.1, 130.9, 130.9, 130.1, 128.2, 123.1, 114.8, 82.0, 28.0, 21.7, 12.2.

**HRMS** (ESI-TOF): Anal Calcd. For.C<sub>22</sub>H<sub>23</sub><sup>79</sup>BrN<sub>2</sub>O<sub>4</sub>S[M+H]<sup>+</sup>: 491.0635, Found: 491.0625. Anal Calcd. For.C<sub>22</sub>H<sub>23</sub><sup>81</sup>BrN<sub>2</sub>O<sub>4</sub>S[M+H]<sup>+</sup>: 493.0615, Found: 493.0602.

**IR** (neat, cm<sup>-1</sup>): ν 2976, 1709, 1386, 1313, 1184, 1133, 1084, 1013, 842, 818, 704, 688, 669.

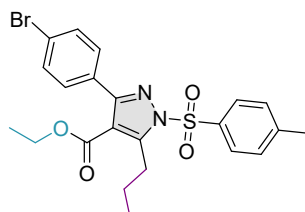

**ethyl 3-(4-bromophenyl)-5-propyl-1-tosyl-1H-pyrazole-4-carboxylate (4j)**

petroleum ether/ ethyl acetate = 10:1, white solid, 66% yield.

**<sup>1</sup>H NMR** (400 MHz, Chloroform-*d*) δ 7.93 (d, *J* = 8.4 Hz, 2H), 7.49 (d, *J* = 8.4 Hz, 2H), 7.40 (d, *J* = 8.5 Hz, 2H), 7.35 (d, *J* = 8.2 Hz, 2H), 4.20 (q, *J* = 7.1 Hz, 2H), 3.38 – 3.15 (m, 2H), 2.43 (s, 3H), 1.85 – 1.68 (m, 2H), 1.19 (t, *J* = 7.1 Hz, 3H), 1.06 (t, *J* = 7.3 Hz, 3H).

**<sup>13</sup>C NMR** (100 MHz, Chloroform-*d*) δ 162.9, 154.1, 153.1, 146.2, 134.5, 130.9, 130.9, 130.8, 130.0, 128.3, 123.3, 112.8, 60.7, 27.8, 23.8, 21.7, 14.1, 13.9.

**HRMS** (ESI-TOF): Anal Calcd. For.C<sub>22</sub>H<sub>23</sub><sup>79</sup>BrN<sub>2</sub>O<sub>4</sub>S[M+H]<sup>+</sup>: 491.0635, Found: 491.0628. Anal Calcd. For.C<sub>22</sub>H<sub>23</sub><sup>81</sup>BrN<sub>2</sub>O<sub>4</sub>S[M+H]<sup>+</sup>: 493.0615, Found: 493.0609.

**IR** (neat, cm<sup>-1</sup>): ν 2970, 2934, 2875, 1071, 1429, 1378, 1302, 1193, 1138, 1108, 1074, 1022, 816, 671.

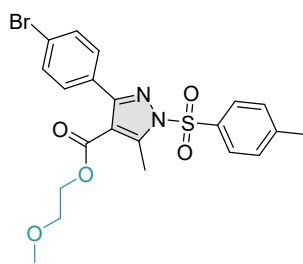

**2-methoxyethyl 3-(4-bromophenyl)-5-methyl-1-tosyl-1H-pyrazole-4-carboxylate (4k)**

petroleum ether/ ethyl acetate = 10:1, white solid, 67% yield.

**<sup>1</sup>H NMR** (400 MHz, Chloroform-*d*) δ 7.92 (d, *J* = 8.4 Hz, 2H), 7.49 (d, *J* = 8.6 Hz, 2H), 7.42 (d, *J* = 8.6 Hz, 2H), 7.35 (d, *J* = 8.1 Hz, 2H), 4.31 – 4.25 (m, 2H), 3.50 – 3.45 (m, 2H), 3.27 (s, 3H), 2.86 (s, 3H), 2.43 (s, 3H).

**<sup>13</sup>C NMR** (100 MHz, Chloroform-*d*) δ 162.9, 154.1, 148.7, 146.3, 134.2, 131.0, 130.9, 130.7, 130.1, 128.2, 123.3, 113.1, 69.9, 63.6, 58.8, 21.7, 12.3.

**HRMS** (ESI-TOF): Anal Calcd. For.C<sub>21</sub>H<sub>21</sub><sup>79</sup>BrN<sub>2</sub>O<sub>5</sub>S[M+H]<sup>+</sup>: 493.0428, Found: 493.0419. Anal Calcd. For.C<sub>21</sub>H<sub>21</sub><sup>81</sup>BrN<sub>2</sub>O<sub>5</sub>S[M+H]<sup>+</sup>: 495.0407, Found: 495.0440.

**IR** (neat, cm<sup>-1</sup>): ν 2920, 2878, 1713, 1394, 1314, 1176, 1145, 1123, 1011, 831, 686, 668.

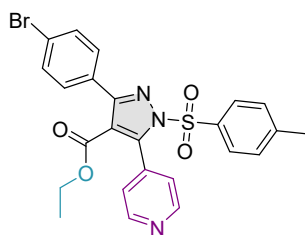

**ethyl 3-(4-bromophenyl)-5-(pyridin-4-yl)-1-tosyl-1H-pyrazole-4-carboxylate (4l)**

petroleum ether/ ethyl acetate = 3:1, white solid, 58% yield.

<sup>1</sup>H NMR (400 MHz, Chloroform-*d*) δ 8.75 (d, *J* = 4.9 Hz, 2H), 7.69 (d, *J* = 8.5 Hz, 2H), 7.60 – 7.51 (m, 4H), 7.35 – 7.30 (m, 2H), 7.28 – 7.25 (m, 2H), 3.97 (q, *J* = 7.1 Hz, 2H), 2.45 (s, 3H), 0.87 (t, *J* = 7.2 Hz, 3H).

<sup>13</sup>C NMR (100 MHz, Chloroform-*d*) δ 161.8, 153.8, 149.2, 146.7, 146.2, 137.1, 133.8, 131.2, 130.8, 130.1, 129.6, 128.5, 124.6, 123.9, 115.4, 61.0, 21.8, 13.3.

HRMS (ESI-TOF): Anal Calcd. For. C<sub>24</sub>H<sub>20</sub><sup>79</sup>BrN<sub>3</sub>O<sub>4</sub>S[M+H]<sup>+</sup>: 526.0431, Found: 526.0433. Anal Calcd. For. C<sub>24</sub>H<sub>20</sub><sup>81</sup>BrN<sub>3</sub>O<sub>4</sub>S[M+H]<sup>+</sup>: 528.0411, Found: 528.0406.

IR (neat, cm<sup>-1</sup>): ν 2984, 1718, 1430, 1391, 1318, 1192, 1171, 1118, 1005, 843, 814, 702, 685, 667.

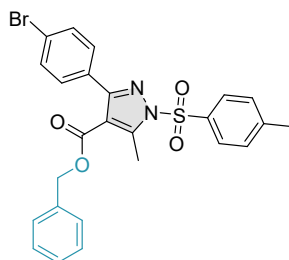

**benzyl 3-(4-bromophenyl)-5-methyl-1-tosyl-1H-pyrazole-4-carboxylate (4m)**

petroleum ether/ ethyl acetate = 10:1, white solid, 40% yield.

<sup>1</sup>H NMR (400 MHz, Chloroform-*d*) δ 7.92 (d, *J* = 8.3 Hz, 2H), 7.41 – 7.23 (m, 9H), 7.17 – 7.09 (m, 2H), 5.15 (s, 2H), 2.86 (s, 3H), 2.43 (s, 3H).

<sup>13</sup>C NMR (100 MHz, Chloroform-*d*) δ 162.7, 154.2, 148.7, 146.3, 134.9, 134.2, 130.9, 130.7, 130.1, 128.5, 128.4, 128.4, 128.2, 123.2, 113.1, 66.5, 21.7, 12.4.

HRMS (ESI-TOF): Anal Calcd. For. C<sub>25</sub>H<sub>21</sub><sup>79</sup>BrN<sub>2</sub>O<sub>4</sub>S[M+H]<sup>+</sup>: 525.0479, Found: 525.0480. Anal Calcd. For. C<sub>25</sub>H<sub>21</sub><sup>81</sup>BrN<sub>2</sub>O<sub>4</sub>S[M+H]<sup>+</sup>: 527.0458, Found: 527.0449.

IR (neat, cm<sup>-1</sup>): ν 1705, 1547, 1394, 1313, 1192, 1175, 1132, 1013, 831, 732, 704, 686, 668.

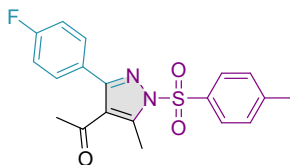

**1-(3-(4-fluorophenyl)-5-methyl-1-tosyl-1H-pyrazol-4-yl)ethan-1-one (4n)**

petroleum ether/ ethyl acetate = 8:1, white solid, 70% yield.

<sup>1</sup>H NMR (400 MHz, Chloroform-*d*) δ 7.92 (d, *J* = 8.4 Hz, 2H), 7.45 – 7.39 (m, 2H), 7.35 (d, *J* = 8.2 Hz, 2H), 7.13 – 7.07 (m, 2H), 2.75 (s, 3H), 2.43 (s, 3H), 2.06 (s, 3H).

<sup>13</sup>C NMR (100 MHz, Chloroform-*d*) δ 195.9, 163.4 (d, *J* = 249.6 Hz), 153.3, 146.2, 134.3, 130.9 (d, *J* = 8.4 Hz), 130.1, 128.1, 128.0, 128.0, 122.6, 115.6 (d, *J* = 21.8 Hz), 31.1, 21.7, 12.0.

<sup>19</sup>F NMR (376 MHz, Chloroform-*d*) δ -111.5.

**HRMS** (ESI-TOF): Anal Calcd. For.  $C_{19}H_{17}FN_2O_3S[M+H]^+$ : 373.1017, Found: 373.1008.

**IR** (neat,  $cm^{-1}$ ):  $\nu$  1672, 1520, 1395, 1227, 1191, 1163, 1112, 843, 816, 739, 673, 661, 617.

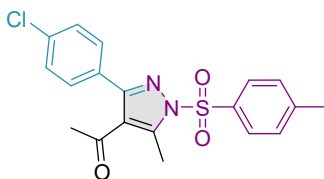

**1-(3-(4-chlorophenyl)-5-methyl-1-tosyl-1H-pyrazol-4-yl)ethan-1-one (4o)**

petroleum ether/ ethyl acetate = 8:1, white solid, 62% yield.

**$^1H$  NMR** (400 MHz,  $DMSO-d_6$ )  $\delta$  7.96 (d,  $J = 8.0$  Hz, 2H), 7.54 – 7.45 (m, 6H), 2.74 (s, 3H), 2.37 (s, 3H), 2.12 (s, 3H).

**$^{13}C$  NMR** (100 MHz,  $DMSO-d_6$ )  $\delta$  194.9, 152.7, 146.7, 146.1, 134.3, 133.4, 130.6, 130.6, 130.3, 128.6, 127.9, 122.2, 31.1, 21.2, 12.0.

**HRMS** (ESI-TOF): Anal Calcd. For.  $C_{19}H_{17}ClN_2O_3S[M+H]^+$ : 389.0722, Found: 389.0724.

**IR** (neat,  $cm^{-1}$ ):  $\nu$  2926, 1660, 1417, 1090, 1015, 839, 830, 703, 667, 657, 611.

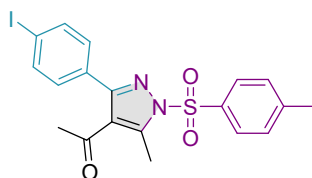

**1-(3-(4-iodophenyl)-5-methyl-1-tosyl-1H-pyrazol-4-yl)ethan-1-one (4p)**

petroleum ether/ ethyl acetate = 10:1, white solid, 60% yield.

**$^1H$  NMR** (400 MHz,  $DMSO-d_6$ )  $\delta$  7.95 (d,  $J = 8.4$  Hz, 2H), 7.82 (d,  $J = 8.3$  Hz, 2H), 7.49 (d,  $J = 8.1$  Hz, 2H), 7.24 (d,  $J = 8.4$  Hz, 2H), 2.72 (s, 3H), 2.39 (s, 3H), 2.13 (s, 3H).

**$^{13}C$  NMR** (100 MHz,  $DMSO-d_6$ )  $\delta$  195.0, 152.9, 146.7, 146.1, 137.3, 133.4, 130.9, 130.8, 130.6, 127.9, 122.2, 96.3, 31.1, 21.2, 12.0.

**HRMS** (ESI-TOF): Anal Calcd. For.  $C_{19}H_{17}IN_2O_3S[M+H]^+$ : 481.0078, Found: 481.0072.

**IR** (neat,  $cm^{-1}$ ):  $\nu$  1672, 1411, 1393, 1312, 1190, 1179, 1110, 1007, 827, 680, 671, 653, 611.

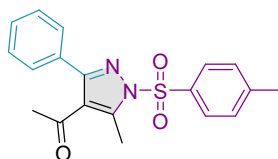

**1-(5-methyl-3-phenyl-1-tosyl-1H-pyrazol-4-yl)ethan-1-one (4q)**

petroleum ether/ ethyl acetate = 8:1, white solid, 82% yield.

**$^1H$  NMR** (400 MHz, Chloroform- $d$ )  $\delta$  7.92 (d,  $J = 8.2$  Hz, 2H), 7.45 – 7.38 (m, 5H), 7.34 (d,  $J = 8.0$  Hz, 2H), 2.75 (s, 3H), 2.41 (s, 3H), 2.04 (s, 3H).

**$^{13}C$  NMR** (100 MHz, Chloroform- $d$ )  $\delta$  196.3, 154.3, 146.2, 146.1, 134.3, 131.9, 130.1, 129.3, 129.0, 128.4, 128.1, 122.7, 31.2, 21.7, 12.0.

**HRMS** (ESI-TOF): Anal Calcd. For.  $C_{19}H_{18}N_2O_3S[M+H]^+$ : 355.1111, Found: 355.1106.

**IR** (neat,  $cm^{-1}$ ):  $\nu$  1671, 1393, 1308, 1188, 1178, 1112, 772, 705, 672, 648, 611.

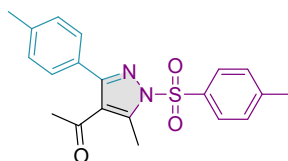

**1-(5-methyl-3-(p-tolyl)-1-tosyl-1H-pyrazol-4-yl)ethan-1-one (4r)**

petroleum ether/ ethyl acetate = 8:1, white solid, 65% yield.

<sup>1</sup>H NMR (400 MHz, Chloroform-*d*) δ 7.92 (d, *J* = 8.4 Hz, 2H), 7.34 (d, *J* = 3.5 Hz, 2H), 7.32 (d, *J* = 3.2 Hz, 2H), 7.21 (d, *J* = 7.9 Hz, 2H), 2.74 (s, 3H), 2.42 (s, 3H), 2.38 (s, 3H), 2.06 (s, 3H).

<sup>13</sup>C NMR (100 MHz, Chloroform-*d*) δ 196.5, 154.4, 146.1, 146.0, 139.3, 134.4, 130.0, 129.1, 128.9, 128.8, 128.1, 122.7, 31.1, 21.6, 21.3, 12.0.

HRMS (ESI-TOF): Anal Calcd. For.C<sub>20</sub>H<sub>20</sub>N<sub>2</sub>O<sub>3</sub>S[M+H]<sup>+</sup>: 369.1268, Found: 369.1261.

IR (neat, cm<sup>-1</sup>): ν 2920, 1666, 1518, 1396, 1365, 1190, 1110, 1020, 960, 824, 817, 736, 671, 661, 619.

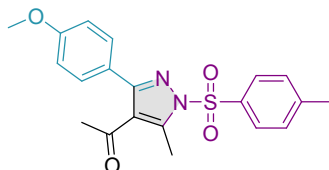**1-(3-(4-methoxyphenyl)-5-methyl-1-tosyl-1H-pyrazol-4-yl)ethan-1-one (4s)**

petroleum ether/ ethyl acetate = 3:1, white solid, 60% yield.

<sup>1</sup>H NMR (400 MHz, Chloroform-*d*) δ 7.92 (d, *J* = 8.4 Hz, 2H), 7.37 (d, *J* = 8.7 Hz, 2H), 7.34 (d, *J* = 8.1 Hz, 2H), 6.94 (d, *J* = 8.7 Hz, 2H), 3.84 (s, 3H), 2.73 (s, 3H), 2.43 (s, 3H), 2.07 (s, 3H).

<sup>13</sup>C NMR (100 MHz, Chloroform-*d*) δ 196.7, 160.5, 154.2, 146.1, 146.1, 134.5, 130.3, 130.1, 128.2, 124.2, 122.7, 113.9, 55.3, 31.2, 21.7, 12.1.

HRMS (ESI-TOF): Anal Calcd. For.C<sub>20</sub>H<sub>20</sub>N<sub>2</sub>O<sub>4</sub>S[M+H]<sup>+</sup>:385.1217, Found: 385.1214.

IR (neat, cm<sup>-1</sup>): ν 2361, 2342, 1665, 1517, 1395, 1250, 1190, 1178, 1108, 1030, 957, 836, 816, 730, 671, 659, 619.

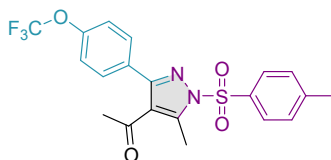**1-(5-methyl-1-tosyl-3-(4-(trifluoromethoxy)phenyl)-1H-pyrazol-4-yl)ethan-1-one (4t)**

petroleum ether/ ethyl acetate = 8:1, white solid, 65% yield.

<sup>1</sup>H NMR (400 MHz, Chloroform-*d*) δ 7.93 (d, *J* = 8.0 Hz, 2H), 7.50 (d, *J* = 8.2 Hz, 2H), 7.37 (d, *J* = 8.0 Hz, 2H), 7.28 (d, *J* = 7.8 Hz, 2H), 2.77 (s, 3H), 2.44 (s, 3H), 2.10 (s, 3H).

<sup>13</sup>C NMR (100 MHz, Chloroform-*d*) δ 195.8, 152.9, 150.0 (q, *J* = 1.9 Hz), 146.4, 146.3, 134.2, 130.6, 130.6, 130.2, 128.2, 122.6, 120.8, 120.3 (q, *J* = 259.2 Hz), 31.3, 21.7, 12.1.

<sup>19</sup>F NMR (376 MHz, Chloroform-*d*) δ -57.8.

HRMS (ESI-TOF): Anal Calcd. For.C<sub>20</sub>H<sub>17</sub>F<sub>3</sub>N<sub>2</sub>O<sub>4</sub>S[M+H]<sup>+</sup>: 439.0934, Found: 439.0931.

IR (neat, cm<sup>-1</sup>): ν 2361, 2341, 1677, 1517, 1262, 1219, 1157, 1111, 1020, 858, 815, 671, 612.

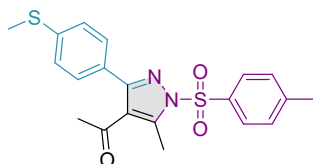**1-(5-methyl-3-(4-(methylthio)phenyl)-1-tosyl-1H-pyrazol-4-yl)ethan-1-one (4u)**

petroleum ether/ ethyl acetate = 8:1, white solid, 56% yield.

**<sup>1</sup>H NMR** (400 MHz, DMSO-*d*<sub>6</sub>) δ 7.95 (d, *J* = 8.3 Hz, 2H), 7.49 (d, *J* = 8.1 Hz, 2H), 7.38 (d, *J* = 8.4 Hz, 2H), 7.32 (d, *J* = 8.4 Hz, 2H), 2.71 (s, 3H), 2.50 (s, 3H), 2.39 (s, 3H), 2.12 (s, 3H).

**<sup>13</sup>C NMR** (100 MHz, DMSO-*d*<sub>6</sub>) δ 195.3, 153.3, 146.6, 145.9, 140.2, 133.5, 130.6, 129.2, 127.9, 127.6, 125.4, 122.2, 31.1, 21.2, 14.3, 11.9.

**HRMS** (ESI-TOF): Anal Calcd. For. C<sub>20</sub>H<sub>20</sub>N<sub>2</sub>O<sub>3</sub>S<sub>2</sub>[M+H]<sup>+</sup>: 401.0989, Found: 401.0987.

**IR** (neat, cm<sup>-1</sup>): ν 2361, 1668, 1391, 1367, 1311, 1190, 1109, 1017, 967, 819, 702, 668, 655, 612.

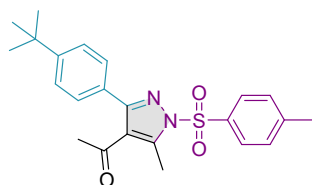

**1-(3-(4-(tert-butyl)phenyl)-5-methyl-1-tosyl-1H-pyrazol-4-yl)ethan-1-one (4v)**

petroleum ether/ ethyl acetate = 8:1, white solid, 60% yield.

**<sup>1</sup>H NMR** (400 MHz, Chloroform-*d*) δ 7.92 (d, *J* = 8.2 Hz, 2H), 7.42 (d, *J* = 8.2 Hz, 2H), 7.37 (d, *J* = 8.3 Hz, 2H), 7.33 (d, *J* = 8.1 Hz, 2H), 2.75 (s, 3H), 2.42 (s, 3H), 2.08 (s, 3H), 1.32 (s, 9H).

**<sup>13</sup>C NMR** (100 MHz, Chloroform-*d*) δ 196.7, 154.4, 152.5, 146.1, 146.0, 134.4, 130.0, 128.9, 128.6, 128.2, 125.4, 122.7, 34.7, 31.3, 31.2, 21.7, 12.0.

**HRMS** (ESI-TOF): Anal Calcd. For. C<sub>23</sub>H<sub>26</sub>N<sub>2</sub>O<sub>3</sub>S[M+H]<sup>+</sup>: 411.1737, Found: 411.1735.

**IR** (neat, cm<sup>-1</sup>): ν 2360, 2342, 1681, 1384, 1192, 1115, 969, 846, 706, 665, 622.

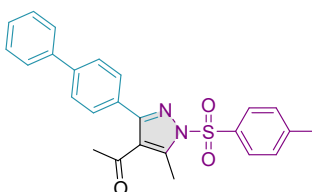

**1-(3-([1,1'-biphenyl]-4-yl)-5-methyl-1-tosyl-1H-pyrazol-4-yl)ethan-1-one (4w)**

petroleum ether/ ethyl acetate = 8:1, white solid, 72% yield.

**<sup>1</sup>H NMR** (400 MHz, DMSO-*d*<sub>6</sub>) δ 7.98 (d, *J* = 8.4 Hz, 2H), 7.75 (d, *J* = 8.4 Hz, 2H), 7.72-7.70 (m, 2H), 7.57 – 7.44 (m, 6H), 7.42 – 7.35 (m, 1H), 2.74 (s, 3H), 2.39 (s, 3H), 2.16 (s, 3H).

**<sup>13</sup>C NMR** (100 MHz, DMSO-*d*<sub>6</sub>) δ 195.4, 153.5, 146.7, 146.0, 141.1, 139.3, 133.5, 130.6, 130.5, 129.4, 129.1, 128.0, 127.9, 126.8, 126.8, 122.4, 31.2, 21.2, 12.0.

**HRMS** (ESI-TOF): Anal Calcd. For. C<sub>25</sub>H<sub>22</sub>N<sub>2</sub>O<sub>3</sub>S[M+H]<sup>+</sup>: 431.1424, Found: 431.1428.

**IR** (neat, cm<sup>-1</sup>): ν 2361, 2342, 1672, 1393, 1189, 1179, 1111, 969, 774, 743, 700, 671, 657, 614.

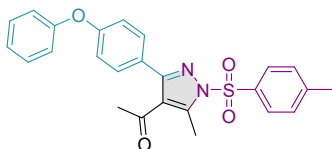

**1-(5-methyl-3-(4-phenoxyphenyl)-1-tosyl-1H-pyrazol-4-yl)ethan-1-one (4x)**

petroleum ether/ ethyl acetate = 8:1, white solid, 63% yield.

**<sup>1</sup>H NMR** (400 MHz, Chloroform-*d*) δ 7.93 (d, *J* = 8.1 Hz, 2H), 7.40 (d, *J* = 8.6 Hz, 2H), 7.37 – 7.33 (m, 4H), 7.15 (t, *J* = 7.4 Hz, 1H), 7.06 – 7.00 (m, 4H), 2.75 (s, 3H), 2.44 (s, 3H), 2.10 (s, 3H).

**<sup>13</sup>C NMR** (100 MHz, Chloroform-*d*) δ 196.3, 158.6, 156.3, 153.8, 146.2, 146.2, 134.4, 130.5, 130.1, 129.9, 128.2, 126.5, 123.9, 122.7, 119.4, 118.3, 31.2, 21.7, 12.1.

**HRMS** (ESI-TOF): Anal Calcd. For. C<sub>25</sub>H<sub>22</sub>N<sub>2</sub>O<sub>4</sub>S[M+H]<sup>+</sup>: 447.1374, Found: 447.1372.

**IR** (neat,  $\text{cm}^{-1}$ ):  $\nu$  1666, 1515, 1489, 1409, 1396, 1360, 1312, 1235, 1191, 1171, 1113, 841, 765, 674, 614.

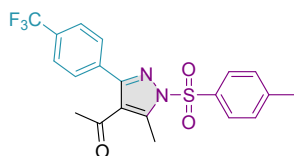

**1-(5-methyl-1-tosyl-3-(4-(trifluoromethyl)phenyl)-1H-pyrazol-4-yl)ethan-1-one (4y)**

petroleum ether/ ethyl acetate = 8:1, white solid, 50% yield.

**$^1\text{H}$  NMR** (400 MHz,  $\text{DMSO-}d_6$ )  $\delta$  7.97 (d,  $J = 7.9$  Hz, 2H), 7.81 (d,  $J = 8.0$  Hz, 2H), 7.69 (d,  $J = 8.0$  Hz, 2H), 7.50 (d,  $J = 8.1$  Hz, 2H), 2.76 (s, 3H), 2.40 (s, 3H), 2.16 (s, 3H).

**$^{13}\text{C}$  NMR** (100 MHz,  $\text{DMSO-}d_6$ )  $\delta$  194.8, 152.5, 146.8, 146.2, 135.6, 133.4, 130.6, 129.7, 129.4, 128.0, 125.3 (q,  $J = 4.7$  Hz), 122.7, 122.3, 31.1, 21.2, 12.0.

**$^{19}\text{F}$  NMR** (376 MHz,  $\text{DMSO-}d_6$ )  $\delta$  -61.3.

**HRMS** (ESI-TOF): Anal Calcd. For.  $\text{C}_{20}\text{H}_{17}\text{F}_3\text{N}_2\text{O}_3\text{S}[\text{M}+\text{H}]^+$ : 423.0985, Found: 423.0980.

**IR** (neat,  $\text{cm}^{-1}$ ):  $\nu$  2923, 2852, 1675, 1397, 1325, 1191, 1168, 1110, 1068, 1019, 850, 814, 670, 657.

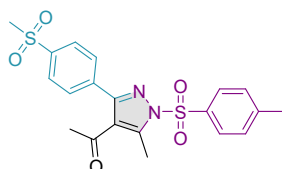

**1-(5-methyl-3-(4-(methylsulfonyl)phenyl)-1-tosyl-1H-pyrazol-4-yl)ethan-1-one (4z)**

petroleum ether/ ethyl acetate = 1:1, white solid, 55% yield.

**$^1\text{H}$  NMR** (400 MHz, Chloroform- $d$ )  $\delta$  7.98 (d,  $J = 8.3$  Hz, 2H), 7.92 (d,  $J = 8.3$  Hz, 2H), 7.66 (d,  $J = 8.3$  Hz, 2H), 7.36 (d,  $J = 8.1$  Hz, 2H), 3.07 (s, 3H), 2.76 (s, 3H), 2.43 (s, 3H), 2.12 (s, 3H).

**$^{13}\text{C}$  NMR** (100 MHz, Chloroform- $d$ )  $\delta$  195.3, 152.2, 146.6, 146.4, 141.1, 137.4, 134.0, 130.2, 130.0, 128.2, 127.5, 122.6, 44.4, 31.4, 21.7, 12.2.

**HRMS** (ESI-TOF): Anal Calcd. For.  $\text{C}_{20}\text{H}_{20}\text{N}_2\text{O}_5\text{S}_2[\text{M}+\text{H}]^+$ : 433.0887, Found: 433.0887.

**IR** (neat,  $\text{cm}^{-1}$ ):  $\nu$  2360, 1674, 1537, 1391, 1311, 1191, 1148, 1111, 1019, 961, 846, 785, 760, 670, 658.

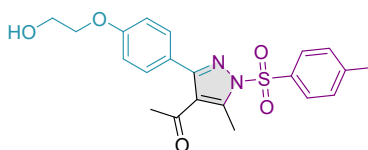

**1-(3-(4-(2-hydroxyethoxy)phenyl)-5-methyl-1-tosyl-1H-pyrazol-4-yl)ethan-1-one (4aa)**

petroleum ether/ ethyl acetate = 1:1, white solid, 42% yield.

**$^1\text{H}$  NMR** (400 MHz, Chloroform- $d$ )  $\delta$  7.92 (d,  $J = 8.4$  Hz, 2H), 7.38 (d,  $J = 8.7$  Hz, 2H), 7.34 (d,  $J = 8.2$  Hz, 2H), 6.96 (d,  $J = 8.7$  Hz, 2H), 4.14 – 4.10 (m, 2H), 4.01 – 3.95 (m, 3H), 2.74 (s, 3H), 2.43 (s, 3H), 2.07 (s, 3H).

**$^{13}\text{C}$  NMR** (100 MHz, Chloroform- $d$ )  $\delta$  196.7, 159.6, 154.0, 146.1, 146.1, 134.5, 130.4, 130.1, 128.2, 124.7, 122.7, 114.5, 69.2, 61.4, 31.2, 21.7, 12.1.

**HRMS** (ESI-TOF): Anal Calcd. For.  $\text{C}_{21}\text{H}_{22}\text{N}_2\text{O}_5\text{S}[\text{M}+\text{H}]^+$ : 415.1323, Found: 415.1319.

**IR** (neat,  $\text{cm}^{-1}$ ):  $\nu$  3435, 2920, 2360, 1656, 1520, 1406, 1390, 1310, 1251, 1186, 1115, 1077, 811, 744, 674, 637.

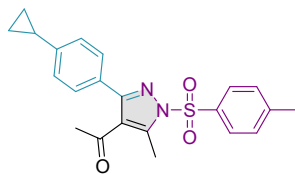

**1-(3-(4-cyclopropylphenyl)-5-methyl-1-tosyl-1H-pyrazol-4-yl)ethan-1-one (4ab)**

petroleum ether/ ethyl acetate = 8:1, white solid, 55% yield.

<sup>1</sup>H NMR (400 MHz, DMSO-*d*<sub>6</sub>) δ 7.95 (d, *J* = 8.4 Hz, 2H), 7.50 (d, *J* = 8.2 Hz, 2H), 7.31 (d, *J* = 8.2 Hz, 2H), 7.16 (d, *J* = 8.3 Hz, 2H), 2.71 (s, 3H), 2.40 (s, 3H), 2.09 (s, 3H), 2.02 – 1.91 (m, 1H), 1.03 – 0.96 (m, 2H), 0.74 – 0.68 (m, 2H).

<sup>13</sup>C NMR (100 MHz, DMSO-*d*<sub>6</sub>) δ 195.5, 153.8, 146.6, 145.8, 145.5, 133.6, 130.6, 128.6, 128.3, 127.9, 125.4, 122.2, 31.1, 21.2, 15.0, 11.9, 9.9.

HRMS (ESI-TOF): Anal Calcd. For. C<sub>22</sub>H<sub>22</sub>N<sub>2</sub>O<sub>3</sub>S[M+H]<sup>+</sup>: 395.1424, Found: 395.1425.

IR (neat, cm<sup>-1</sup>): ν 2922, 2852, 1666, 1518, 1410, 1366, 1310, 1190, 1173, 1110, 1016, 969, 815, 716, 618, 657, 622.

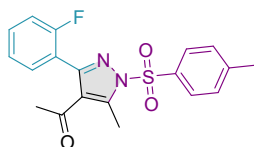

**1-(3-(2-fluorophenyl)-5-methyl-1-tosyl-1H-pyrazol-4-yl)ethan-1-one (4ac)**

petroleum ether/ ethyl acetate = 8:1, white solid, 52% yield.

<sup>1</sup>H NMR (400 MHz, Chloroform-*d*) δ 7.92 (d, *J* = 8.4 Hz, 2H), 7.51 (td, *J* = 7.4, 1.8 Hz, 1H), 7.48 – 7.38 (m, 1H), 7.35 (d, *J* = 8.1 Hz, 2H), 7.24 (td, *J* = 7.5, 1.1 Hz, 1H), 7.14 – 7.08 (m, 1H), 2.79 (s, 3H), 2.44 (s, 3H), 2.07 (d, *J* = 1.2 Hz, 3H).

<sup>13</sup>C NMR (100 MHz, Chloroform-*d*) δ 195.1, 160.0 (d, *J* = 248.5 Hz), 148.9, 146.4, 146.3, 134.3, 131.5 (d, *J* = 8.2 Hz), 131.2 (d, *J* = 2.8 Hz), 130.2, 128.2, 124.5 (d, *J* = 3.6 Hz), 123.1, 120.4 (d, *J* = 14.7 Hz), 115.7 (d, *J* = 21.2 Hz), 29.9 (d, *J* = 2.0 Hz), 21.7, 12.1.

<sup>19</sup>F NMR (376 MHz, Chloroform-*d*) δ -114.1.

HRMS (ESI-TOF): Anal Calcd. For. C<sub>19</sub>H<sub>17</sub>FN<sub>2</sub>O<sub>3</sub>S[M+H]<sup>+</sup>: 373.1017, Found: 373.1019.

IR (neat, cm<sup>-1</sup>): ν 2360, 1666, 1536, 1395, 1369, 1318, 1189, 1179, 1116, 1106, 972, 816, 759, 750, 672, 648, 615.

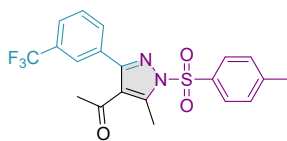

**1-(5-methyl-1-tosyl-3-(3-(trifluoromethyl)phenyl)-1H-pyrazol-4-yl)ethan-1-one (4ad)**

petroleum ether/ ethyl acetate = 8:1, white solid, 50% yield.

<sup>1</sup>H NMR (400 MHz, Chloroform-*d*) δ 7.93 (d, *J* = 8.0 Hz, 2H), 7.76 – 7.67 (m, 2H), 7.66 – 7.62 (m, 1H), 7.58 – 7.52 (m, 1H), 7.37 (d, *J* = 8.1 Hz, 2H), 2.77 (s, 3H), 2.44 (s, 3H), 2.07 (s, 3H).

<sup>13</sup>C NMR (100 MHz, Chloroform-*d*) δ 195.5, 152.8, 146.6, 146.5, 134.1, 132.8, 132.4, 131.2, 130.8, 130.2, 129.0, 128.2, 126.0 (q, *J* = 3.9 Hz), 122.6, 122.4, 31.2, 21.7, 12.2.

<sup>19</sup>F NMR (376 MHz, Chloroform-*d*) δ -62.7.

HRMS (ESI-TOF): Anal Calcd. For. C<sub>20</sub>H<sub>17</sub>F<sub>3</sub>N<sub>2</sub>O<sub>3</sub>S[M+H]<sup>+</sup>: 423.0985, Found: 423.0983.

**IR** (neat,  $\text{cm}^{-1}$ ):  $\nu$  2364, 1673, 1531, 1414, 1333, 1305, 1272, 1191, 1162, 1113, 1074, 981, 822, 808, 746, 706, 673, 658, 640.

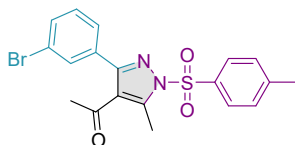

**1-(3-(3-bromophenyl)-5-methyl-1-tosyl-1H-pyrazol-4-yl)ethan-1-one (4ae)**

petroleum ether/ ethyl acetate = 10:1, white solid, 65% yield.

**$^1\text{H}$  NMR** (400 MHz, Chloroform-*d*)  $\delta$  7.92 (d,  $J = 8.5$  Hz, 2H), 7.63 (t,  $J = 1.8$  Hz, 1H), 7.58 – 7.54 (m, 1H), 7.39 – 7.32 (m, 3H), 7.28 (t,  $J = 7.8$  Hz, 1H), 2.75 (s, 3H), 2.44 (s, 3H), 2.08 (s, 3H).

**$^{13}\text{C}$  NMR** (100 MHz, Chloroform-*d*)  $\delta$  195.7, 152.7, 146.4, 146.3, 134.2, 133.9, 132.3, 131.8, 130.2, 129.9, 128.2, 127.7, 122.6, 122.5, 31.3, 21.7, 12.1.

**HRMS** (ESI-TOF): Anal Calcd. For.  $\text{C}_{19}\text{H}_{17}^{79}\text{BrN}_2\text{O}_3\text{S}[\text{M}+\text{H}]^+$ : 433.0217, Found: 433.0221. Anal Calcd. For.  $\text{C}_{19}\text{H}_{17}^{81}\text{BrN}_2\text{O}_3\text{S}[\text{M}+\text{H}]^+$ : 435.0196, Found: 435.0194.

**IR** (neat,  $\text{cm}^{-1}$ ):  $\nu$  1668, 1534, 1394, 1367, 1310, 1190, 1178, 1113, 801, 704, 689, 670, 650, 620.

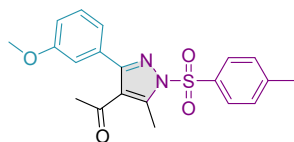

**1-(3-(3-methoxyphenyl)-5-methyl-1-tosyl-1H-pyrazol-4-yl)ethan-1-one (4af)**

petroleum ether/ ethyl acetate = 10:1, white solid, 71% yield.

**$^1\text{H}$  NMR** (400 MHz, DMSO-*d*<sub>6</sub>)  $\delta$  7.95 (d,  $J = 8.4$  Hz, 2H), 7.50 (d,  $J = 8.1$  Hz, 2H), 7.41 – 7.34 (m, 1H), 7.07 – 7.03 (m, 1H), 7.00 – 6.95 (m, 2H), 3.77 (s, 3H), 2.71 (s, 3H), 2.40 (s, 3H), 2.08 (s, 3H).

**$^{13}\text{C}$  NMR** (100 MHz, DMSO-*d*<sub>6</sub>)  $\delta$  195.2, 159.1, 153.7, 146.7, 145.9, 133.5, 132.8, 130.6, 129.8, 127.9, 122.3, 121.1, 115.0, 114.2, 55.2, 31.0, 21.2, 11.9.

**HRMS** (ESI-TOF): Anal Calcd. For.  $\text{C}_{20}\text{H}_{20}\text{N}_2\text{O}_4\text{S}[\text{M}+\text{H}]^+$ : 385.1217, Found: 385.1208.

**IR** (neat,  $\text{cm}^{-1}$ ):  $\nu$  2923, 2852, 1675, 1591, 1536, 1409, 1311, 1244, 1188, 1179, 1112, 985, 862, 797, 705, 670, 655, 634.

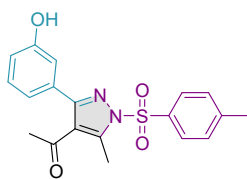

**1-(3-(3-hydroxyphenyl)-5-methyl-1-tosyl-1H-pyrazol-4-yl)ethan-1-one (4ag)**

petroleum ether/ ethyl acetate = 3:1, white solid, 76% yield.

**$^1\text{H}$  NMR** (400 MHz, Chloroform-*d*)  $\delta$  7.92 (d,  $J = 8.3$  Hz, 2H), 7.35 (d,  $J = 8.2$  Hz, 2H), 7.27 – 7.22 (m, 1H), 6.94 – 6.91 (m, 2H), 6.90 – 6.86 (m, 1H), 5.88 (s, 1H), 2.75 (s, 3H), 2.43 (s, 3H), 2.08 (s, 3H).

**$^{13}\text{C}$  NMR** (100 MHz, Chloroform-*d*)  $\delta$  196.8, 156.0, 154.2, 146.4, 146.3, 134.3, 133.0, 130.2, 129.8, 128.2, 122.7, 121.3, 116.7, 115.9, 31.2, 21.7, 12.1.

**HRMS** (ESI-TOF): Anal Calcd. For.  $\text{C}_{19}\text{H}_{18}\text{N}_2\text{O}_4\text{S}[\text{M}+\text{H}]^+$ : 371.1061, Found: 371.1059.

**IR** (neat,  $\text{cm}^{-1}$ ):  $\nu$  3280, 2360, 1657, 1536, 1380, 1318, 1190, 1181, 1114, 993, 866, 804, 711, 672, 656.



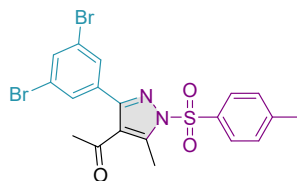

**1-(3-(3,5-dibromophenyl)-5-methyl-1H-pyrazol-4-yl)ethan-1-one (4ah)**

petroleum ether/ ethyl acetate = 10:1, white solid, 50% yield.

<sup>1</sup>H NMR (400 MHz, DMSO-*d*<sub>6</sub>) δ 7.97 (d, *J* = 8.4 Hz, 2H), 7.95 (d, *J* = 1.4 Hz, 1H), 7.68 (d, *J* = 1.8 Hz, 2H), 7.51 (d, *J* = 8.1 Hz, 2H), 2.76 (s, 3H), 2.40 (s, 3H), 2.20 (s, 3H).

<sup>13</sup>C NMR (100 MHz, DMSO-*d*<sub>6</sub>) δ 194.2, 151.1, 146.8, 146.2, 135.5, 134.1, 133.3, 130.7, 130.6, 128.0, 122.3, 122.2, 31.2, 21.2, 12.2.

HRMS (ESI-TOF): Anal Calcd. For. C<sub>19</sub>H<sub>16</sub><sup>79</sup>Br<sub>2</sub>N<sub>2</sub>O<sub>3</sub>S[M+H]<sup>+</sup>: 510.9322, Found:510.9293. Anal Calcd. For. C<sub>19</sub>H<sub>16</sub><sup>79</sup>Br<sup>81</sup>BrN<sub>2</sub>O<sub>3</sub>S[M+H]<sup>+</sup>: 512.9301, Found: 512.9309. C<sub>19</sub>H<sub>16</sub><sup>81</sup>Br<sub>2</sub>N<sub>2</sub>O<sub>3</sub>S[M+H]<sup>+</sup>: 514.9281, Found:514.9303.

IR (neat, cm<sup>-1</sup>): ν 1674, 1546, 1529, 1395, 1310, 1192, 1179, 1114, 983, 857, 813, 725, 684, 670, 653, 624.

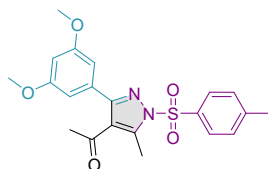

**1-(3-(3,5-dimethoxyphenyl)-5-methyl-1H-pyrazol-4-yl)ethan-1-one (4ai)**

petroleum ether/ ethyl acetate = 3:1, white solid, 71% yield.

<sup>1</sup>H NMR (400 MHz, DMSO-*d*<sub>6</sub>) δ 7.95 (d, *J* = 8.5 Hz, 2H), 7.50 (d, *J* = 8.2 Hz, 2H), 6.61 (t, *J* = 2.3 Hz, 1H), 6.54 (d, *J* = 2.3 Hz, 2H), 3.76 (s, 6H), 2.71 (s, 3H), 2.40 (s, 3H), 2.09 (s, 3H).

<sup>13</sup>C NMR (100 MHz, DMSO-*d*<sub>6</sub>) δ 195.2, 160.4, 153.7, 146.7, 145.8, 133.5, 133.5, 130.6, 127.9, 122.2, 106.9, 101.1, 55.4, 30.9, 21.2, 11.8.

HRMS (ESI-TOF): Anal Calcd. For. C<sub>21</sub>H<sub>22</sub>N<sub>2</sub>O<sub>5</sub>S[M+H]<sup>+</sup>: 415.1323, Found: 415.1323.

IR (neat, cm<sup>-1</sup>): ν 2921, 2850, 1673, 1601, 1319, 1192, 1181, 1156, 1114, 1024, 995, 840, 814, 717, 697, 670, 656.

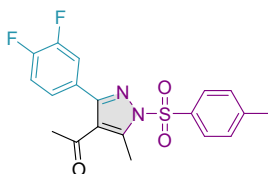

**1-(3-(3,4-difluorophenyl)-5-methyl-1H-pyrazol-4-yl)ethan-1-one (4aj)**

petroleum ether/ ethyl acetate = 8:1, white solid, 58% yield.

<sup>1</sup>H NMR (400 MHz, Chloroform-*d*) δ 7.92 (d, *J* = 8.5 Hz, 2H), 7.36 (d, *J* = 8.2 Hz, 2H), 7.34 – 7.27 (m, 1H), 7.24 – 7.13 (m, 2H), 2.75 (s, 3H), 2.44 (s, 3H), 2.11 (s, 3H).

<sup>13</sup>C NMR (100 MHz, Chloroform-*d*) δ 195.5, 152.1, 151.8 (dd, *J* = 93.7, 11.8 Hz), 149.3 (dd, *J* = 93.4, 11.9 Hz), 146.4, 146.3, 134.1, 130.2, 128.9, 128.2, 125.5 (q, *J* = 5.0, 4.3 Hz), 122.5, 118.2 (d, *J* = 18.3 Hz), 117.4 (d, *J* = 17.4 Hz), 31.2, 21.7, 12.1.

<sup>19</sup>F NMR (376 MHz, Chloroform-*d*) δ -136.1 (d, *J* = 21.3 Hz), -136.7 (d, *J* = 21.2 Hz).

HRMS (ESI-TOF): Anal Calcd. For. C<sub>19</sub>H<sub>16</sub>F<sub>2</sub>N<sub>2</sub>O<sub>3</sub>S[M+H]<sup>+</sup>: 391.0923, Found: 391.0920.

**IR** (neat,  $\text{cm}^{-1}$ ):  $\nu$  1669, 1517, 1399, 1314, 1268, 1190, 1180, 1107, 989, 889, 825, 813, 777, 671, 655.

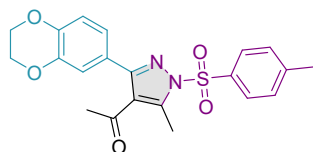

**1-(3-(2,3-dihydrobenzo[b][1,4]dioxin-6-yl)-5-methyl-1-tosyl-1H-pyrazol-4-yl)ethan-1-one (4ak)**

petroleum ether/ ethyl acetate = 3:1, white solid, 55% yield.

**$^1\text{H}$  NMR** (400 MHz,  $\text{DMSO-}d_6$ )  $\delta$  7.94 (d,  $J$  = 8.1 Hz, 2H), 7.50 (d,  $J$  = 8.1 Hz, 2H), 6.96 – 6.89 (m, 2H), 6.89 – 6.83 (m, 1H), 4.27 (s, 4H), 2.68 (s, 3H), 2.40 (s, 3H), 2.12 (s, 3H).

**$^{13}\text{C}$  NMR** (100 MHz,  $\text{DMSO-}d_6$ )  $\delta$  195.5, 153.3, 146.6, 145.7, 144.5, 143.2, 133.6, 130.6, 127.9, 124.3, 122.2, 121.9, 117.3, 117.2, 64.2, 64.1, 31.1, 21.2, 11.9.

**HRMS** (ESI-TOF): Anal Calcd. For  $\text{C}_{21}\text{H}_{20}\text{N}_2\text{O}_5\text{S}[\text{M}+\text{H}]^+$ : 413.1166, Found: 413.1160.

**IR** (neat,  $\text{cm}^{-1}$ ):  $\nu$  2360, 2342, 1664, 1517, 1283, 1189, 1109, 1067, 893, 864, 863, 826, 741, 671, 657.

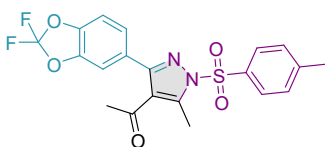

**1-(3-(2,2-difluorobenzo[d][1,3]dioxol-5-yl)-5-methyl-1-tosyl-1H-pyrazol-4-yl)ethan-1-one (4al)**

petroleum ether/ ethyl acetate = 8:1, white solid, 62% yield.

**$^1\text{H}$  NMR** (400 MHz, Chloroform- $d$ )  $\delta$  7.92 (d,  $J$  = 8.3 Hz, 2H), 7.36 (d,  $J$  = 8.1 Hz, 2H), 7.22 (d,  $J$  = 1.6 Hz, 1H), 7.17 – 7.08 (m, 2H), 2.76 (s, 3H), 2.44 (s, 3H), 2.12 (s, 3H).

**$^{13}\text{C}$  NMR** (100 MHz, Chloroform- $d$ )  $\delta$  195.8, 152.7, 146.4, 146.3, 144.5, 143.8, 134.2, 131.6, 130.2, 128.3, 128.0, 124.9, 122.5, 110.3, 109.4, 31.3, 21.7, 12.1.

**$^{19}\text{F}$  NMR** (376 MHz, Chloroform- $d$ )  $\delta$  -49.8.

**HRMS** (ESI-TOF): Anal Calcd. For  $\text{C}_{20}\text{H}_{16}\text{F}_2\text{N}_2\text{O}_5\text{S}[\text{M}+\text{H}]^+$ : 435.0821, Found: 435.0823.

**IR** (neat,  $\text{cm}^{-1}$ ):  $\nu$  2361, 2342, 1674, 1463, 1237, 1192, 1149, 1108, 1031, 914, 816, 702, 676, 655, 640.

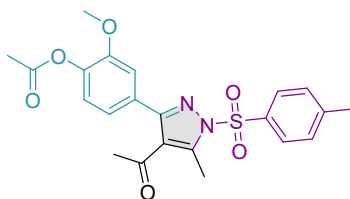

**4-(4-acetyl-5-methyl-1-tosyl-1H-pyrazol-3-yl)-2-methoxyphenyl acetate (4am)**

petroleum ether/ ethyl acetate = 3:1, white solid, 51% yield.

**$^1\text{H}$  NMR** (400 MHz, Chloroform- $d$ )  $\delta$  7.91 (d,  $J$  = 8.1 Hz, 2H), 7.34 (d,  $J$  = 8.2 Hz, 2H), 7.12 – 7.03 (m, 2H), 7.00 – 6.93 (m, 1H), 3.84 (s, 3H), 2.73 (s, 3H), 2.42 (s, 3H), 2.31 (s, 3H), 2.10 (s, 3H).

**$^{13}\text{C}$  NMR** (100 MHz, Chloroform- $d$ )  $\delta$  196.3, 168.5, 153.4, 151.0, 146.2, 146.0, 140.6, 134.1, 130.5, 130.0, 128.1, 122.8, 122.6, 121.4, 112.9, 55.9, 31.2, 21.6, 20.5, 11.9.

**HRMS** (ESI-TOF): Anal Calcd. For  $\text{C}_{22}\text{H}_{22}\text{N}_2\text{O}_6\text{S}[\text{M}+\text{H}]^+$ : 443.1272, Found: 443.1276.

**IR** (neat,  $\text{cm}^{-1}$ ):  $\nu$  2360, 2342, 1764, 1664, 1397, 1367, 1316, 1217, 1190, 1176, 1111, 988, 869, 821, 670, 658.

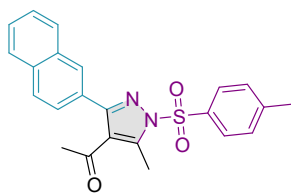

**1-(5-methyl-3-(naphthalen-2-yl)-1-tosyl-1H-pyrazol-4-yl)ethan-1-one (4an)**

petroleum ether/ ethyl acetate = 8:1, white solid, 66% yield.

<sup>1</sup>H NMR (400 MHz, DMSO-*d*<sub>6</sub>) δ 8.06 – 7.95 (m, 6H), 7.62 – 7.55 (m, 3H), 7.51 (d, *J* = 7.9 Hz, 2H), 2.76 (s, 3H), 2.40 (s, 3H), 2.11 (s, 3H).

<sup>13</sup>C NMR (100 MHz, DMSO-*d*<sub>6</sub>) δ 195.3, 153.8, 146.7, 146.1, 133.6, 133.0, 132.5, 130.6, 128.9, 128.3, 128.2, 128.1, 127.9, 127.7, 127.1, 126.8, 126.2, 122.5, 31.1, 21.2, 12.0.

HRMS (ESI-TOF): Anal Calcd. For.C<sub>23</sub>H<sub>20</sub>N<sub>2</sub>O<sub>3</sub>S[M+H]<sup>+</sup>: 405.1268, Found: 405.1265.

IR (neat, cm<sup>-1</sup>): ν 2360, 1669, 1528, 1408, 1364, 1307, 1190, 1177, 1108, 985, 860, 827, 747, 681, 669, 659, 625.

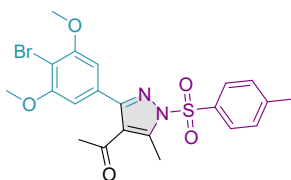

**1-(3-(4-bromo-3,5-dimethoxyphenyl)-5-methyl-1-tosyl-1H-pyrazol-4-yl)ethan-1-one (4ao)**

petroleum ether/ ethyl acetate = 3:1, white solid, 73% yield.

<sup>1</sup>H NMR (400 MHz, Chloroform-*d*) δ 7.91 (d, *J* = 8.4 Hz, 2H), 7.34 (d, *J* = 8.1 Hz, 2H), 6.62 (s, 2H), 3.87 (s, 6H), 2.73 (s, 3H), 2.41 (s, 3H), 2.09 (s, 3H).

<sup>13</sup>C NMR (100 MHz, Chloroform-*d*) δ 196.2, 157.0, 153.5, 146.3, 146.1, 134.2, 132.2, 130.1, 128.2, 122.6, 105.4, 102.3, 56.5, 31.2, 21.7, 12.0.

HRMS (ESI-TOF): Anal Calcd. For.C<sub>21</sub>H<sub>21</sub><sup>79</sup>BrN<sub>2</sub>O<sub>5</sub>S[M+H]<sup>+</sup>: 493.0428, Found: 493.0423. Anal Calcd. For.C<sub>21</sub>H<sub>21</sub><sup>81</sup>BrN<sub>2</sub>O<sub>5</sub>S[M+H]<sup>+</sup>: 495.0407, Found: 495.0425.

IR (neat, cm<sup>-1</sup>): ν 2361, 2342, 1670, 1579, 1404, 1390, 1241, 1189, 1179, 1118, 1001, 846, 719, 679, 660, 630.

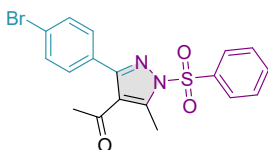

**1-(3-(4-bromophenyl)-5-methyl-1-(phenylsulfonyl)-1H-pyrazol-4-yl)ethan-1-one (4ap)**

petroleum ether/ ethyl acetate = 8:1, white solid, 68% yield.

<sup>1</sup>H NMR (400 MHz, Chloroform-*d*) δ 8.05 (d, *J* = 7.5 Hz, 2H), 7.71 – 7.66 (m, 1H), 7.59 – 7.54 (m, 4H), 7.32 (d, *J* = 8.4 Hz, 2H), 2.76 (s, 3H), 2.09 (s, 3H).

<sup>13</sup>C NMR (100 MHz, Chloroform-*d*) δ 196.0, 153.3, 146.5, 137.3, 134.9, 131.8, 130.8, 130.5, 129.5, 128.2, 123.9, 122.7, 31.3, 12.1.

HRMS (ESI-TOF): Anal Calcd. For.C<sub>18</sub>H<sub>15</sub><sup>79</sup>BrN<sub>2</sub>O<sub>3</sub>S[M+H]<sup>+</sup>: 419.0060, Found: 419.0065. Anal Calcd. For.C<sub>18</sub>H<sub>15</sub><sup>81</sup>BrN<sub>2</sub>O<sub>3</sub>S[M+H]<sup>+</sup>: 421.0040, Found: 421.0047.

IR (neat, cm<sup>-1</sup>): ν 2361, 1674, 1416, 1394, 1313, 1189, 1168, 1108, 1013, 967, 838, 755, 727, 683, 653, 619.

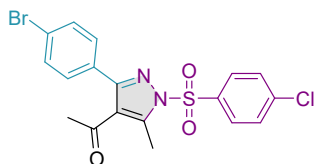

**1-(3-(4-bromophenyl)-1-((4-chlorophenyl)sulfonyl)-5-methyl-1H-pyrazol-4-yl)ethan-1-one (4aq)**

petroleum ether/ ethyl acetate = 10:1, white solid, 66% yield.

<sup>1</sup>H NMR (400 MHz, Chloroform-*d*) δ 7.99 (d, *J* = 8.3 Hz, 2H), 7.58 – 7.52 (m, 4H), 7.32 (d, *J* = 8.0 Hz, 2H), 2.76 (s, 3H), 2.09 (s, 3H).

<sup>13</sup>C NMR (100 MHz, Chloroform-*d*) δ 195.9, 153.6, 146.6, 141.9, 135.6, 131.8, 130.6, 130.5, 129.9, 129.7, 124.0, 122.8, 31.3, 12.1.

HRMS (ESI-TOF): Anal Calcd. For.C<sub>18</sub>H<sub>14</sub><sup>79</sup>BrClN<sub>2</sub>O<sub>3</sub>S[M+H]<sup>+</sup>: 452.9670, Found: 452.9663. Anal Calcd. For.C<sub>18</sub>H<sub>14</sub><sup>81</sup>BrClN<sub>2</sub>O<sub>3</sub>S[M+H]<sup>+</sup>: 454.9650, Found: 454.9653.

IR (neat, cm<sup>-1</sup>): ν 1673, 1532, 1394, 1311, 1188, 1164, 1113, 1010, 833, 768, 755, 702, 657, 630, 620, 608.

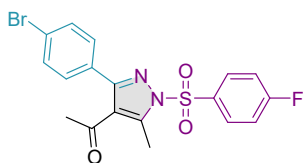

**1-(3-(4-bromophenyl)-1-((4-fluorophenyl)sulfonyl)-5-methyl-1H-pyrazol-4-yl)ethan-1-one (4ar)**

petroleum ether/ ethyl acetate = 10:1, white solid, 57% yield.

<sup>1</sup>H NMR (400 MHz, Chloroform-*d*) δ 8.12 (dd, *J* = 8.7, 4.9 Hz, 2H), 7.60 (d, *J* = 8.0 Hz, 2H), 7.35 (d, *J* = 8.1 Hz, 2H), 7.29 (d, *J* = 7.6 Hz, 2H), 2.80 (s, 3H), 2.13 (s, 3H).

<sup>13</sup>C NMR (100 MHz, Chloroform-*d*) δ 195.9, 166.4 (d, *J* = 259.4 Hz), 153.5, 146.5, 133.2 (d, *J* = 3.0 Hz), 131.8, 131.3 (d, *J* = 10.0 Hz), 130.7, 130.5, 124.0, 122.7, 117.0 (d, *J* = 23.0 Hz), 31.3, 12.1.

<sup>19</sup>F NMR (376 MHz, Chloroform-*d*) δ -100.4.

HRMS (ESI-TOF): Anal Calcd. For.C<sub>18</sub>H<sub>14</sub><sup>79</sup>BrFN<sub>2</sub>O<sub>3</sub>S[M+H]<sup>+</sup>: 436.9966, Found: 436.9958. Anal Calcd. For.C<sub>18</sub>H<sub>14</sub><sup>81</sup>BrFN<sub>2</sub>O<sub>3</sub>S[M+H]<sup>+</sup>: 438.9949, Found: 438.9939.

IR (neat, cm<sup>-1</sup>): ν 2358, 1674, 1394, 1313, 1188, 1155, 1112, 1081, 1011, 836, 828, 708, 690, 674, 654, 612.

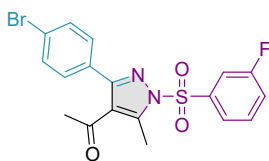

**1-(3-(4-bromophenyl)-1-((3-fluorophenyl)sulfonyl)-5-methyl-1H-pyrazol-4-yl)ethan-1-one (4as)**

petroleum ether/ ethyl acetate = 8:1, white solid, 50% yield.

<sup>1</sup>H NMR (400 MHz, Chloroform-*d*) δ 7.88 – 7.81 (m, 1H), 7.78 – 7.71 (m, 1H), 7.62 – 7.52 (m, 3H), 7.43 – 7.34 (m, 1H), 7.32 (d, *J* = 8.4 Hz, 2H), 2.76 (s, 3H), 2.10 (s, 3H).

<sup>13</sup>C NMR (100 MHz, Chloroform-*d*) δ 195.9, 162.3 (d, *J* = 253.4 Hz), 153.6, 146.7, 139.0 (d, *J* = 7.2 Hz), 131.8, 131.4 (d, *J* = 7.8 Hz), 130.5, 130.5, 124.0 (d, *J* = 1.8 Hz), 124.0, 122.9, 122.3 (d, *J* = 21.2 Hz), 115.6 (d, *J* = 25.1 Hz), 31.3, 12.1.

<sup>19</sup>F NMR (376 MHz, Chloroform-*d*) δ -107.8.

HRMS (ESI-TOF): Anal Calcd. For.C<sub>18</sub>H<sub>14</sub><sup>79</sup>BrFN<sub>2</sub>O<sub>3</sub>S[M+H]<sup>+</sup>: 439.9966, Found: 436.9968. Anal Calcd. For.C<sub>18</sub>H<sub>14</sub><sup>81</sup>BrFN<sub>2</sub>O<sub>3</sub>S[M+H]<sup>+</sup>: 438.9945, Found: 438.9952.

**IR** (neat,  $\text{cm}^{-1}$ ):  $\nu$  2361, 1674, 1428, 1396, 1313, 1228, 1182, 1109, 1072, 1011, 968, 838, 699, 672, 653, 618, 607.

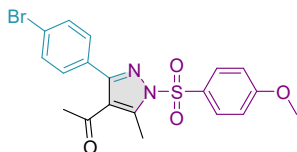

**1-(3-(4-bromophenyl)-1-((4-methoxyphenyl)sulfonyl)-5-methyl-1H-pyrazol-4-yl)ethan-1-one (4at)**  
petroleum ether/ ethyl acetate = 5:1, white solid, 65% yield.

**$^1\text{H}$  NMR** (400 MHz, Chloroform-*d*)  $\delta$  7.97 (d,  $J = 9.0$  Hz, 2H), 7.54 (d,  $J = 8.4$  Hz, 2H), 7.32 (d,  $J = 8.4$  Hz, 2H), 6.99 (d,  $J = 9.0$  Hz, 2H), 3.86 (s, 3H), 2.75 (s, 3H), 2.08 (s, 3H).

**$^{13}\text{C}$  NMR** (100 MHz, Chloroform-*d*)  $\delta$  195.9, 164.7, 153.0, 146.1, 131.7, 130.9, 130.6, 130.6, 128.4, 123.7, 122.4, 114.7, 55.8, 31.3, 12.1.

**HRMS** (ESI-TOF): Anal Calcd. For  $\text{C}_{19}\text{H}_{17}^{79}\text{BrN}_2\text{O}_4\text{S}[\text{M}+\text{H}]^+$ : 449.0166, Found: 449.0162. Anal Calcd. For  $\text{C}_{19}\text{H}_{17}^{81}\text{BrN}_2\text{O}_4\text{S}[\text{M}+\text{H}]^+$ : 451.0145, Found: 451.0139.

**IR** (neat,  $\text{cm}^{-1}$ ):  $\nu$  2361, 1667, 1594, 1391, 1370, 1314, 1267, 1192, 1161, 1112, 1083, 1010, 840, 833, 806, 689, 677, 656.

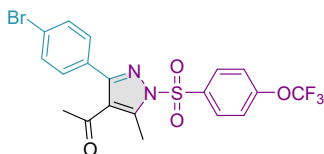

**1-(3-(4-bromophenyl)-5-methyl-1-((4-(trifluoromethoxy)phenyl)sulfonyl)-1H-pyrazol-4-yl)ethan-1-one (4au)**

petroleum ether/ ethyl acetate = 10:1, white solid, 40% yield.

**$^1\text{H}$  NMR** (400 MHz, Chloroform-*d*)  $\delta$  8.11 (d,  $J = 8.8$  Hz, 2H), 7.57 (d,  $J = 8.4$  Hz, 2H), 7.38 (d,  $J = 8.6$  Hz, 2H), 7.32 (d,  $J = 8.2$  Hz, 2H), 2.76 (s, 3H), 2.10 (s, 3H).

**$^{13}\text{C}$  NMR** (100 MHz, Chloroform-*d*)  $\delta$  195.9, 153.7, 146.5, 142.0, 135.1, 134.4, 131.9, 130.7, 130.5, 127.3, 124.1, 123.0, 121.0, 31.4, 12.2.

**$^{19}\text{F}$  NMR** (376 MHz, Chloroform-*d*)  $\delta$  -57.6.

**HRMS** (ESI-TOF): Anal Calcd. For  $\text{C}_{19}\text{H}_{14}^{79}\text{BrF}_3\text{N}_2\text{O}_4\text{S}[\text{M}+\text{H}]^+$ : 502.9883, Found: 502.9886. Anal Calcd. For  $\text{C}_{19}\text{H}_{14}^{81}\text{BrF}_3\text{N}_2\text{O}_4\text{S}[\text{M}+\text{H}]^+$ : 504.9863, Found: 504.9866.

**IR** (neat,  $\text{cm}^{-1}$ ):  $\nu$  3435, 2920, 2360, 1656, 1520, 1406, 1310, 1251, 1186, 1115, 1077, 970, 811, 744, 674, 637.

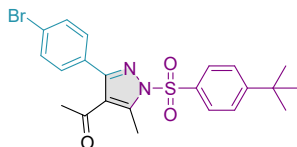

**1-(3-(4-bromophenyl)-1-((4-(tert-butyl)phenyl)sulfonyl)-5-methyl-1H-pyrazol-4-yl)ethan-1-one (4av)**

petroleum ether/ ethyl acetate = 10:1, white solid, 58% yield.

**$^1\text{H}$  NMR** (400 MHz, Chloroform-*d*)  $\delta$  7.96 (d,  $J = 8.7$  Hz, 2H), 7.59–7.53 (m, 4H), 7.34 (d,  $J = 8.5$  Hz, 2H), 2.75 (s, 3H), 2.09 (s, 3H), 1.33 (s, 9H).

**$^{13}\text{C}$  NMR** (100 MHz, Chloroform-*d*)  $\delta$  196.1, 159.1, 153.1, 146.3, 134.2, 131.7, 130.9, 130.6, 128.1, 126.6, 123.8, 122.6, 35.4, 31.3, 30.9, 12.1.

**HRMS** (ESI-TOF): Anal Calcd. For.  $C_{22}H_{23}^{79}BrN_2O_3S[M+H]^+$ : 475.0686, Found: 475.0680. Anal Calcd. For.  $C_{22}H_{23}^{81}BrN_2O_3S[M+H]^+$ : 477.0666, Found: 477.0668.

**IR** (neat,  $cm^{-1}$ ):  $\nu$  2956, 2362, 1681, 1374, 1184, 1115, 1103, 833, 658, 627, 610.

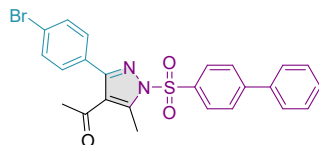

**1-(1-((1,1'-biphenyl-4-yl)sulfonyl)-3-(4-bromophenyl)-5-methyl-1H-pyrazol-4-yl)ethan-1-one (4aw)**

petroleum ether/ ethyl acetate = 8:1, white solid, 56% yield.

**$^1H$  NMR** (400 MHz, Chloroform-*d*)  $\delta$  8.10 (d,  $J$  = 8.5 Hz, 2H), 7.76 (d,  $J$  = 8.6 Hz, 2H), 7.60 – 7.53 (m, 4H), 7.51 – 7.40 (m, 3H), 7.34 (d,  $J$  = 8.4 Hz, 2H), 2.80 (s, 3H), 2.10 (s, 3H).

**$^{13}C$  NMR** (100 MHz, Chloroform-*d*)  $\delta$  195.9, 153.3, 147.8, 146.4, 138.5, 135.5, 131.7, 130.8, 130.5, 129.1, 129.0, 128.7, 128.0, 127.3, 123.8, 122.6, 31.3, 12.1.

**HRMS** (ESI-TOF): Anal Calcd. For.  $C_{24}H_{19}^{79}BrN_2O_3S[M+H]^+$ : 495.0373, Found: 495.0370. Anal Calcd. For.  $C_{24}H_{19}^{81}BrN_2O_3S[M+H]^+$ : 497.0353, Found: 497.0350.

**IR** (neat,  $cm^{-1}$ ):  $\nu$  2361, 1668, 1391, 1367, 1311, 1190, 1179, 1109, 1017, 967, 819, 702, 668, 655, 612.

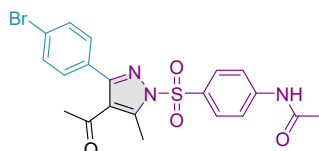

**N-(4-((4-acetyl-3-(4-bromophenyl)-5-methyl-1H-pyrazol-1-yl)sulfonyl)phenyl)acetamide (4ax)**

petroleum ether/ ethyl acetate = 1:1, white solid, 60% yield.

**$^1H$  NMR** (400 MHz, Chloroform-*d*)  $\delta$  8.27 (s, 1H), 7.92 (d,  $J$  = 8.5 Hz, 2H), 7.71 (d,  $J$  = 8.5 Hz, 2H), 7.54 (d,  $J$  = 8.0 Hz, 2H), 7.29 (d,  $J$  = 8.3 Hz, 2H), 2.75 (s, 3H), 2.17 (s, 3H), 2.10 (s, 3H).

**$^{13}C$  NMR** (100 MHz, Chloroform-*d*)  $\delta$  196.0, 169.1, 153.3, 146.4, 144.2, 131.8, 130.9, 130.6, 130.4, 129.6, 123.9, 122.6, 119.4, 31.3, 24.6, 12.1.

**HRMS** (ESI-TOF): Anal Calcd. For.  $C_{20}H_{18}^{79}BrN_3O_4S[M+H]^+$ : 476.0275, Found: 476.0272. Anal Calcd. For.  $C_{20}H_{18}^{81}BrN_3O_4S[M+H]^+$ : 478.0254, Found: 478.0247.

**IR** (neat,  $cm^{-1}$ ):  $\nu$  2362, 1705, 1658, 1528, 1406, 1369, 1316, 1192, 1173, 1108, 1010, 836, 822, 652, 634, 627, 620, 606.

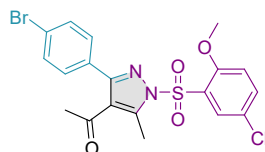

**1-(3-(4-bromophenyl)-1-((5-chloro-2-methoxyphenyl)sulfonyl)-5-methyl-1H-pyrazol-4-yl)ethan-1-one (4ay)**

petroleum ether/ ethyl acetate = 3:1, colorless oil, 58% yield.

**$^1H$  NMR** (400 MHz, Chloroform-*d*)  $\delta$  8.10 (d,  $J$  = 2.6 Hz, 1H), 7.55 (d,  $J$  = 2.7 Hz, 1H), 7.52 (d,  $J$  = 8.3 Hz, 2H), 7.29 (d,  $J$  = 8.4 Hz, 2H), 6.91 (d,  $J$  = 8.9 Hz, 1H), 3.81 (s, 3H), 2.82 (s, 3H), 2.12 (s, 3H).

**$^{13}C$  NMR** (100 MHz, Chloroform-*d*)  $\delta$  196.0, 155.9, 153.2, 148.6, 136.5, 131.7, 131.0, 130.7, 130.5, 126.3, 126.0, 123.8, 121.8, 113.9, 56.6, 31.4, 12.2.

**HRMS** (ESI-TOF): Anal Calcd. For.  $C_{19}H_{16}^{79}BrClN_2O_4S[M+H]^+$ : 482.9776, Found: 482.9776. Anal Calcd. For.  $C_{19}H_{16}^{81}BrClN_2O_4S[M+H]^+$ : 484.9755, Found: 484.9773.

**IR** (neat,  $cm^{-1}$ ):  $\nu$  2923, 2361, 2341, 1673, 1478, 1274, 1187, 1111, 1010, 961, 829, 814, 725, 654, 645, 615.

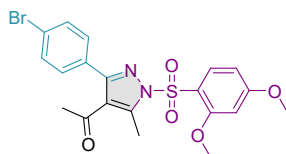

**1-(3-(4-bromophenyl)-1-((2,4-dimethoxyphenyl)sulfonyl)-5-methyl-1H-pyrazol-4-yl)ethan-1-one (4az)**

petroleum ether/ ethyl acetate = 3:1, white solid, 64% yield.

**$^1H$  NMR** (400 MHz, Chloroform-*d*)  $\delta$  8.04 (d,  $J$  = 9.0 Hz, 1H), 7.51 (d,  $J$  = 8.4 Hz, 2H), 7.30 (d,  $J$  = 8.5 Hz, 2H), 6.58 (dd,  $J$  = 9.0, 2.3 Hz, 1H), 6.42 (d,  $J$  = 2.3 Hz, 1H), 3.84 (s, 3H), 3.79 (s, 3H), 2.81 (s, 3H), 2.11 (s, 3H).

**$^{13}C$  NMR** (100 MHz, Chloroform-*d*)  $\delta$  195.9, 166.6, 159.1, 152.4, 147.8, 133.4, 131.5, 131.1, 130.5, 123.4, 121.4, 116.9, 105.1, 99.2, 56.1, 55.8, 31.3, 12.1.

**HRMS** (ESI-TOF): Anal Calcd. For.  $C_{20}H_{19}^{79}BrN_2O_5S[M+H]^+$ : 479.0271, Found: 479.0271. Anal Calcd. For.  $C_{20}H_{19}^{81}BrN_2O_5S[M+H]^+$ : 481.0251, Found: 481.0233.

**IR** (neat,  $cm^{-1}$ ):  $\nu$  2360, 1671, 1413, 1364, 1299, 1186, 1168, 1104, 1075, 1012, 842, 678, 655, 608.

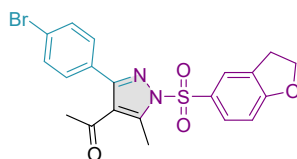

**1-(3-(4-bromophenyl)-1-((2,3-dihydrobenzofuran-5-yl)sulfonyl)-5-methyl-1H-pyrazol-4-yl)ethan-1-one (4ba)**

petroleum ether/ ethyl acetate = 10:1, white solid, 71% yield.

**$^1H$  NMR** (400 MHz, Chloroform-*d*)  $\delta$  7.87 – 7.80 (m, 2H), 7.55 (d,  $J$  = 8.5 Hz, 2H), 7.32 (d,  $J$  = 8.4 Hz, 2H), 6.86 (d,  $J$  = 8.5 Hz, 1H), 4.69 (t,  $J$  = 8.9 Hz, 2H), 3.26 (t,  $J$  = 8.8 Hz, 2H), 2.75 (s, 3H), 2.08 (s, 3H).

**$^{13}C$  NMR** (100 MHz, Chloroform-*d*)  $\delta$  196.0, 165.8, 152.8, 146.0, 131.7, 131.0, 130.6, 130.5, 129.1, 128.2, 125.6, 123.7, 122.4, 110.0, 72.7, 31.3, 28.8, 12.1.

**HRMS** (ESI-TOF): Anal Calcd. For.  $C_{20}H_{17}^{79}BrN_2O_4S[M+H]^+$ : 461.0166, Found: 461.0164. Anal Calcd. For.  $C_{20}H_{17}^{81}BrN_2O_4S[M+H]^+$ : 463.0145, Found: 463.0146.

**IR** (neat,  $cm^{-1}$ ):  $\nu$  2955, 2895, 1666, 1393, 1366, 1243, 1187, 1159, 1107, 1060, 1010, 893, 828, 702, 656, 614, 605.

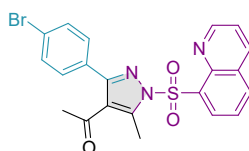

**1-(3-(4-bromophenyl)-5-methyl-1-(quinolin-8-ylsulfonyl)-1H-pyrazol-4-yl)ethan-1-one (4bb)**

petroleum ether/ ethyl acetate = 3:1, white solid, 51% yield.

**$^1H$  NMR** (400 MHz, Chloroform-*d*)  $\delta$  8.93 (d,  $J$  = 3.3 Hz, 1H), 8.71 (d,  $J$  = 7.4 Hz, 1H), 8.22 (d,  $J$  = 8.3 Hz, 1H), 8.14 (d,  $J$  = 8.2 Hz, 1H), 7.70 (t,  $J$  = 7.9 Hz, 1H), 7.51 (dd,  $J$  = 8.3, 4.2 Hz, 1H), 7.44 (d,  $J$  = 8.0 Hz, 2H), 7.19 (d,  $J$  = 8.0 Hz, 2H), 3.14 (s, 3H), 2.10 (s, 3H).

$^{13}\text{C}$  NMR (100 MHz, Chloroform-*d*)  $\delta$  196.1, 153.1, 151.5, 150.0, 143.6, 136.5, 135.7, 134.2, 133.6, 131.5, 131.0, 130.5, 128.7, 125.5, 123.6, 122.5, 121.5, 31.4, 12.9.

HRMS (ESI-TOF): Anal Calcd. For  $\text{C}_{21}\text{H}_{16}^{79}\text{BrN}_3\text{O}_3\text{S}[\text{M}+\text{H}]^+$ : 470.0169, Found: 470.0163. Anal Calcd. For  $\text{C}_{21}\text{H}_{16}^{81}\text{BrN}_3\text{O}_3\text{S}[\text{M}+\text{H}]^+$ : 472.0149, Found: 472.0130.

IR (neat,  $\text{cm}^{-1}$ ):  $\nu$  1674, 1384, 1371, 1309, 1183, 1113, 1091, 1008, 831, 792, 690, 676, 658, 631.

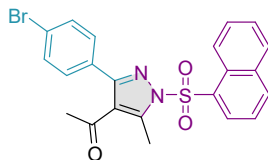

**1-(3-(4-bromophenyl)-5-methyl-1-(naphthalen-1-ylsulfonyl)-1H-pyrazol-4-yl)ethan-1-one (4bc)**  
petroleum ether/ ethyl acetate = 8:1, white solid, 64% yield.

$^1\text{H}$  NMR (400 MHz, DMSO-*d*<sub>6</sub>)  $\delta$  8.77 – 8.70 (m, 1H), 8.61 – 8.54 (m, 1H), 8.47 (d,  $J$  = 8.2 Hz, 1H), 8.17 (d,  $J$  = 8.2 Hz, 1H), 7.87 – 7.78 (m, 2H), 7.75 – 7.70 (m, 1H), 7.66 (d,  $J$  = 8.4 Hz, 2H), 7.38 (d,  $J$  = 8.4 Hz, 2H), 2.66 (s, 3H), 2.10 (s, 3H).

$^{13}\text{C}$  NMR (100 MHz, DMSO-*d*<sub>6</sub>)  $\delta$  194.7, 151.9, 145.6, 137.4, 133.8, 131.7, 131.5, 131.3, 130.8, 130.7, 129.5, 129.3, 127.7, 127.3, 124.9, 123.5, 122.9, 122.4, 31.0, 12.1.

HRMS (ESI-TOF): Anal Calcd. For  $\text{C}_{22}\text{H}_{17}^{79}\text{BrN}_2\text{O}_3\text{S}[\text{M}+\text{H}]^+$ : 469.0217, Found: 469.0214. Anal Calcd. For  $\text{C}_{22}\text{H}_{17}^{81}\text{BrN}_2\text{O}_3\text{S}[\text{M}+\text{H}]^+$ : 471.0196, Found: 471.0213.

IR (neat,  $\text{cm}^{-1}$ ):  $\nu$  2921, 2851, 1670, 1632, 1419, 1372, 1310, 1182, 1106, 1010, 968, 838, 806, 766, 689, 645, 628, 617.

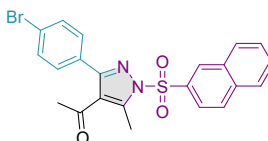

**1-(3-(4-bromophenyl)-5-methyl-1-(naphthalen-2-ylsulfonyl)-1H-pyrazol-4-yl)ethan-1-one (4bd)**  
petroleum ether/ ethyl acetate = 8:1, white solid, 50% yield.

$^1\text{H}$  NMR (400 MHz, Chloroform-*d*)  $\delta$  8.66 (s, 1H), 8.03 – 7.87 (m, 4H), 7.72 – 7.62 (m, 2H), 7.54 (d,  $J$  = 8.4 Hz, 2H), 7.31 (d,  $J$  = 8.4 Hz, 2H), 2.81 (s, 3H), 2.07 (s, 3H).

$^{13}\text{C}$  NMR (100 MHz, Chloroform-*d*)  $\delta$  195.9, 153.3, 146.5, 135.6, 134.0, 131.8, 131.7, 130.8, 130.5, 130.3, 130.1, 130.0, 129.6, 128.1, 128.0, 123.8, 122.7, 122.3, 31.3, 12.2.

HRMS (ESI-TOF): Anal Calcd. For  $\text{C}_{22}\text{H}_{17}^{79}\text{BrN}_2\text{O}_3\text{S}[\text{M}+\text{H}]^+$ : 469.0217, Found: 469.0214. Anal Calcd. For  $\text{C}_{22}\text{H}_{17}^{81}\text{BrN}_2\text{O}_3\text{S}[\text{M}+\text{H}]^+$ : 471.0196, Found: 471.0195.

IR (neat,  $\text{cm}^{-1}$ ):  $\nu$  2360, 1666, 1536, 1395, 1369, 1318, 1189, 1179, 1116, 1106, 972, 759, 750, 672, 648, 615.

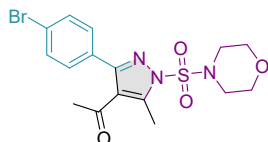

**1-(3-(4-bromophenyl)-5-methyl-1-(morpholin-4-ylsulfonyl)-1H-pyrazol-4-yl)ethan-1-one (4be)**  
petroleum ether/ ethyl acetate = 8:1, white solid, 47% yield.

$^1\text{H}$  NMR (400 MHz, Chloroform-*d*)  $\delta$  7.60 (d,  $J$  = 8.5 Hz, 2H), 7.37 (d,  $J$  = 8.4 Hz, 2H), 3.81 – 3.74 (m, 4H), 3.56 – 3.49 (m, 4H), 2.71 (s, 3H), 2.14 (s, 3H).

$^{13}\text{C}$  NMR (100 MHz, Chloroform-*d*)  $\delta$  195.7, 152.0, 146.3, 131.8, 131.1, 130.5, 123.8, 121.5, 66.0, 47.5, 31.2, 12.0.



**HRMS** (ESI-TOF): Anal Calcd. For.  $C_{16}H_{18}^{79}BrN_3O_4S[M+H]^+$ : 428.0275, Found: 428.0271. Anal Calcd. For.  $C_{16}H_{18}^{81}BrN_3O_4S[M+H]^+$ : 430.0254, Found: 430.0245.

**IR** (neat,  $cm^{-1}$ ):  $\nu$  2361, 1671, 1533, 1393, 1372, 1308, 1188, 1178, 1166, 1112, 772, 705, 672, 648, 611.

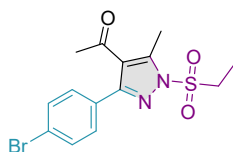

**1-(3-(4-bromophenyl)-1-(ethylsulfonyl)-5-methyl-1H-pyrazol-4-yl)ethan-1-one (4bf)**

petroleum ether/ ethyl acetate = 10:1, white solid, 69% yield.

**$^1H$  NMR** (400 MHz, Chloroform-*d*)  $\delta$  7.58 (d,  $J$  = 8.4 Hz, 2H), 7.38 (d,  $J$  = 8.4 Hz, 2H), 3.60 (q,  $J$  = 7.4 Hz, 2H), 2.74 (s, 3H), 2.13 (s, 3H), 1.35 (t,  $J$  = 7.4 Hz, 3H).

**$^{13}C$  NMR** (100 MHz, Chloroform-*d*)  $\delta$  195.8, 153.3, 147.5, 131.8, 130.7, 130.5, 124.0, 122.2, 49.3, 31.3, 11.9, 7.6.

**HRMS** (ESI-TOF): Anal Calcd. For.  $C_{14}H_{15}^{79}BrN_2O_3S[M+H]^+$ : 371.0060, Found: 371.0058. Anal Calcd. For.  $C_{14}H_{15}^{81}BrN_2O_3S[M+H]^+$ : 373.0040, Found: 373.0034.

**IR** (neat,  $cm^{-1}$ ):  $\nu$  2988, 2939, 1679, 1445, 1246, 1149, 1071, 1035, 1012, 830, 741, 624.

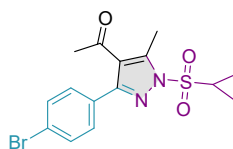

**1-(3-(4-bromophenyl)-1-(cyclopropylsulfonyl)-5-methyl-1H-pyrazol-4-yl)ethan-1-one (4bg)**

petroleum ether/ ethyl acetate = 8:1, white solid, 73% yield.

**$^1H$  NMR** (400 MHz, Chloroform-*d*)  $\delta$  7.59 (d,  $J$  = 8.0 Hz, 2H), 7.39 (d,  $J$  = 8.1 Hz, 2H), 3.03 – 2.90 (m, 1H), 2.73 (s, 3H), 2.14 (s, 3H), 1.55 – 1.48 (m, 2H), 1.27 – 1.18 (m, 2H).

**$^{13}C$  NMR** (100 MHz, Chloroform-*d*)  $\delta$  196.0, 153.0, 146.5, 131.8, 130.9, 130.5, 123.9, 122.3, 32.0, 31.3, 12.0, 7.1.

**HRMS** (ESI-TOF): Anal Calcd. For.  $C_{15}H_{15}^{79}BrN_2O_3S[M+H]^+$ : 383.0060, Found: 383.0056. Anal Calcd. For.  $C_{15}H_{15}^{81}BrN_2O_3S[M+H]^+$ : 385.0040, Found: 385.0033.

**IR** (neat,  $cm^{-1}$ ):  $\nu$  2360, 2341, 1686, 1426, 1382, 1308, 1178, 1114, 1069, 1008, 880, 836, 716, 652, 616.

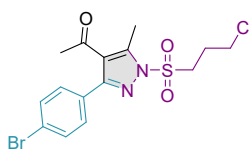

**1-(3-(4-bromophenyl)-1-((2-chloroethyl)sulfonyl)-5-methyl-1H-pyrazol-4-yl)ethan-1-one (4bh)**

petroleum ether/ ethyl acetate = 10:1, white solid, 52% yield.

**$^1H$  NMR** (400 MHz, Chloroform-*d*)  $\delta$  7.61 (d,  $J$  = 8.5 Hz, 2H), 7.39 (d,  $J$  = 8.5 Hz, 2H), 3.80 – 3.74 (m, 2H), 3.65 (t,  $J$  = 6.1 Hz, 2H), 2.76 (s, 3H), 2.35 – 2.23 (m, 2H), 2.15 (s, 3H).

**$^{13}C$  NMR** (100 MHz, Chloroform-*d*)  $\delta$  195.8, 153.5, 147.3, 131.9, 130.5, 124.1, 122.5, 52.0, 41.9, 31.4, 26.0, 12.0.

**HRMS** (ESI-TOF): Anal Calcd. For.  $C_{15}H_{16}^{79}BrClN_2O_3S[M+H]^+$ : 418.9827, Found: 418.9821. Anal Calcd. For.  $C_{15}H_{16}^{81}BrClN_2O_3S[M+H]^+$ : 420.9806, Found: 420.9797.

**IR** (neat,  $cm^{-1}$ ):  $\nu$  1665, 1367, 1313, 1161, 1111, 1038, 1010, 967, 832, 659, 616.

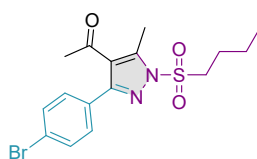

**1-(3-(4-bromophenyl)-1-(butylsulfonyl)-5-methyl-1H-pyrazol-4-yl)ethan-1-one (4bi)**

petroleum ether/ ethyl acetate = 10:1, white solid, 52% yield.

$^1\text{H NMR}$  (400 MHz, Chloroform-*d*)  $\delta$  7.59 (d,  $J$  = 8.4 Hz, 2H), 7.39 (d,  $J$  = 8.4 Hz, 2H), 3.58 – 3.51 (m, 2H), 2.74 (s, 3H), 2.14 (s, 3H), 1.80 – 1.70 (m, 2H), 1.44 (h,  $J$  = 7.4 Hz, 2H), 0.92 (t,  $J$  = 7.4 Hz, 3H).

$^{13}\text{C NMR}$  (100 MHz, Chloroform-*d*)  $\delta$  195.9, 153.3, 147.3, 131.8, 130.7, 130.5, 124.0, 122.2, 54.3, 31.3, 24.6, 21.1, 13.3, 12.0.

**HRMS** (ESI-TOF): Anal Calcd. For.  $\text{C}_{16}\text{H}_{19}^{79}\text{BrN}_2\text{O}_3\text{S}[\text{M}+\text{H}]^+$ : 399.0373, Found: 399.0370. Anal Calcd. For.  $\text{C}_{16}\text{H}_{19}^{81}\text{BrN}_2\text{O}_3\text{S}[\text{M}+\text{H}]^+$ : 401.0353, Found: 401.0345.

**IR** (neat,  $\text{cm}^{-1}$ ):  $\nu$  2961, 2934, 1681, 1444, 1149, 1070, 1034, 1012, 830, 736.

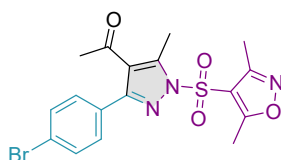

**1-(3-(4-bromophenyl)-1-((3,5-dimethylisoxazol-4-yl)sulfonyl)-5-methyl-1H-pyrazol-4-yl)ethan-1-one (4bj)**

petroleum ether/ ethyl acetate = 10:1, white solid, 63% yield.

$^1\text{H NMR}$  (400 MHz, Chloroform-*d*)  $\delta$  7.57 (d,  $J$  = 8.0 Hz, 2H), 7.31 (d,  $J$  = 8.1 Hz, 2H), 2.77 (s, 3H), 2.76 (s, 3H), 2.46 (s, 3H), 2.12 (s, 3H).

$^{13}\text{C NMR}$  (100 MHz, Chloroform-*d*)  $\delta$  195.7, 176.6, 158.0, 153.2, 146.3, 131.9, 130.5, 130.3, 124.1, 122.5, 114.4, 31.3, 13.2, 12.0, 11.0.

**HRMS** (ESI-TOF): Anal Calcd. For.  $\text{C}_{17}\text{H}_{16}^{79}\text{BrN}_3\text{O}_4\text{S}[\text{M}+\text{Na}]^+$ : 459.9938, Found: 559.9947. Anal Calcd. For.  $\text{C}_{17}\text{H}_{16}^{81}\text{BrN}_3\text{O}_4\text{S}[\text{M}+\text{Na}]^+$ : 461.9917, Found: 461.9999.

**IR** (neat,  $\text{cm}^{-1}$ ):  $\nu$  2361, 1672, 1587, 1536, 1398, 1395, 1309, 1271, 1202, 1133, 1106, 1010, 968, 847, 824, 689, 677, 662, 639, 612.

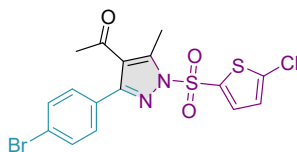

**1-(3-(4-bromophenyl)-1-((5-chlorothiophen-2-yl)sulfonyl)-5-methyl-1H-pyrazol-4-yl)ethan-1-one (4bk)**

petroleum ether/ ethyl acetate = 10:1, white solid, 50% yield.

$^1\text{H NMR}$  (400 MHz, Chloroform-*d*)  $\delta$  7.69 (d,  $J$  = 4.2 Hz, 1H), 7.58 (d,  $J$  = 8.4 Hz, 2H), 7.36 (d,  $J$  = 8.5 Hz, 2H), 6.99 (d,  $J$  = 4.2 Hz, 1H), 2.76 (s, 3H), 2.12 (s, 3H).

$^{13}\text{C NMR}$  (100 MHz, Chloroform-*d*)  $\delta$  195.8, 153.7, 146.5, 142.0, 135.1, 134.4, 131.9, 130.5, 130.5, 127.3, 124.1, 122.9, 31.3, 12.2.

**HRMS** (ESI-TOF): Anal Calcd. For.  $\text{C}_{16}\text{H}_{12}^{79}\text{BrClN}_2\text{O}_3\text{S}_2[\text{M}+\text{H}]^+$ : 458.9234, Found: 458.9226. Anal Calcd. For.  $\text{C}_{20}\text{H}_{19}^{81}\text{BrN}_2\text{O}_3\text{S}_2[\text{M}+\text{H}]^+$ : 460.9214, Found: 460.9201.

IR (neat,  $\text{cm}^{-1}$ ):  $\nu$  2361, 2341, 1676, 1525, 1500, 1397, 1310, 1182, 1113, 1014, 1002, 967, 826, 683, 656, 630, 621, 609.

## Spectra

### 1-(3-(4-bromophenyl)-5-methyl-1-tosyl-1H-pyrazol-4-yl)ethan-1-one (4a)

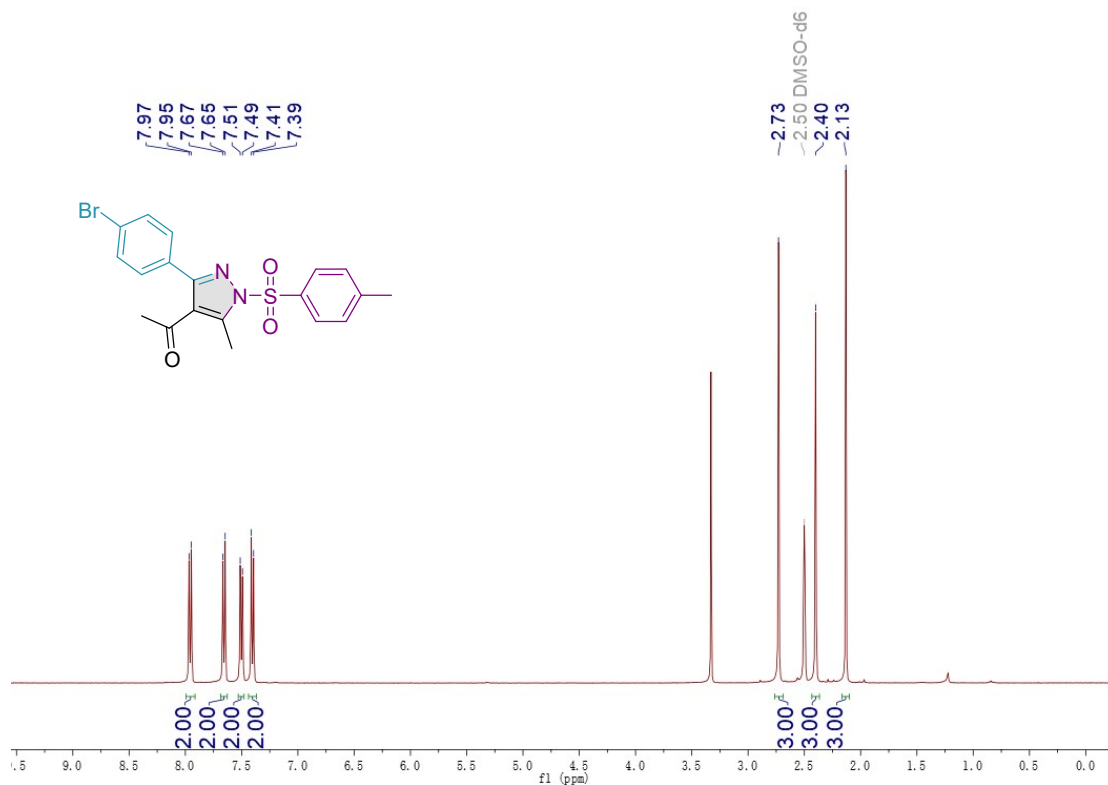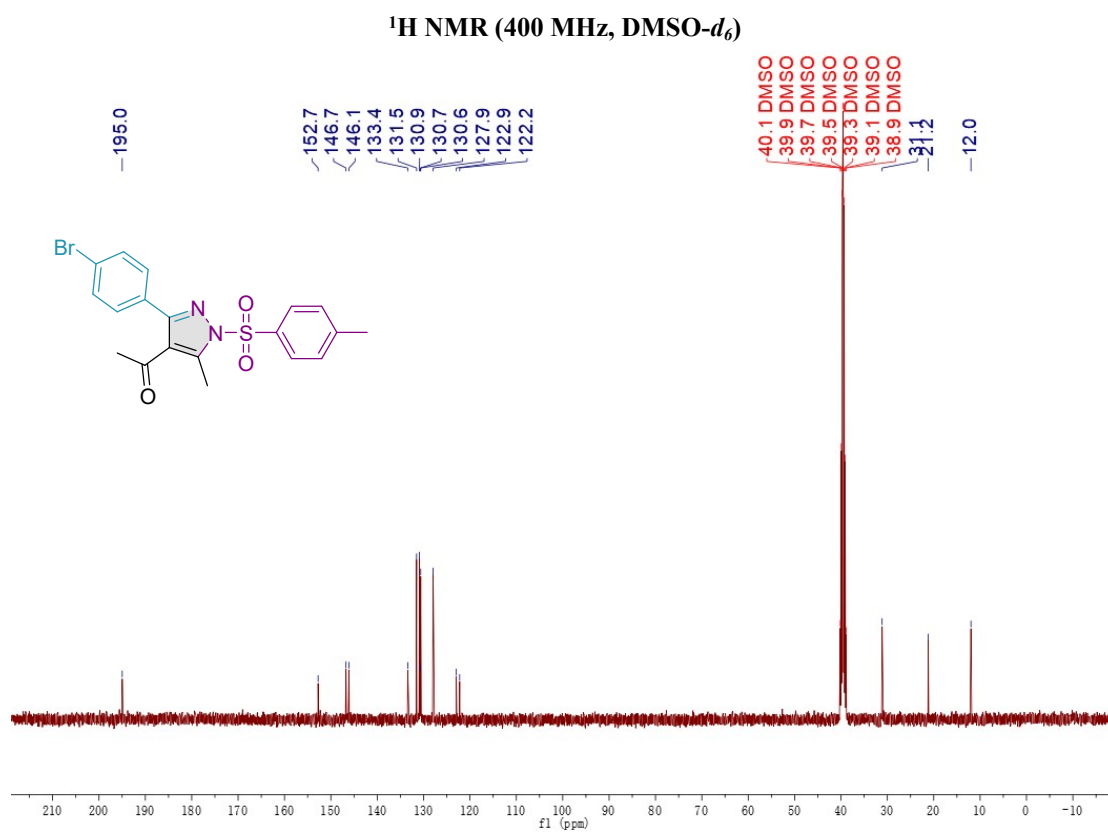

<sup>13</sup>C NMR (100 MHz, DMSO-*d*<sub>6</sub>)

1-(3-(4-bromophenyl)-5-ethyl-1-tosyl-1*H*-pyrazol-4-yl)propan-1-one (4b)

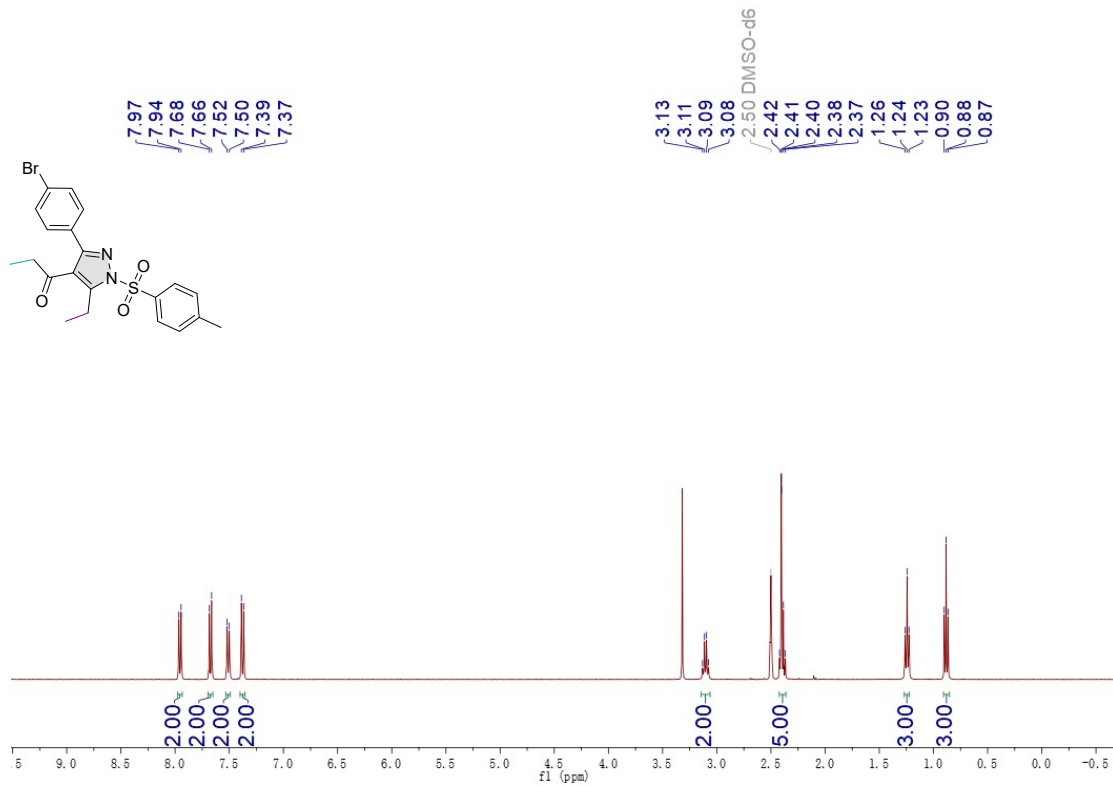

<sup>1</sup>H NMR (400 MHz, DMSO-*d*<sub>6</sub>)

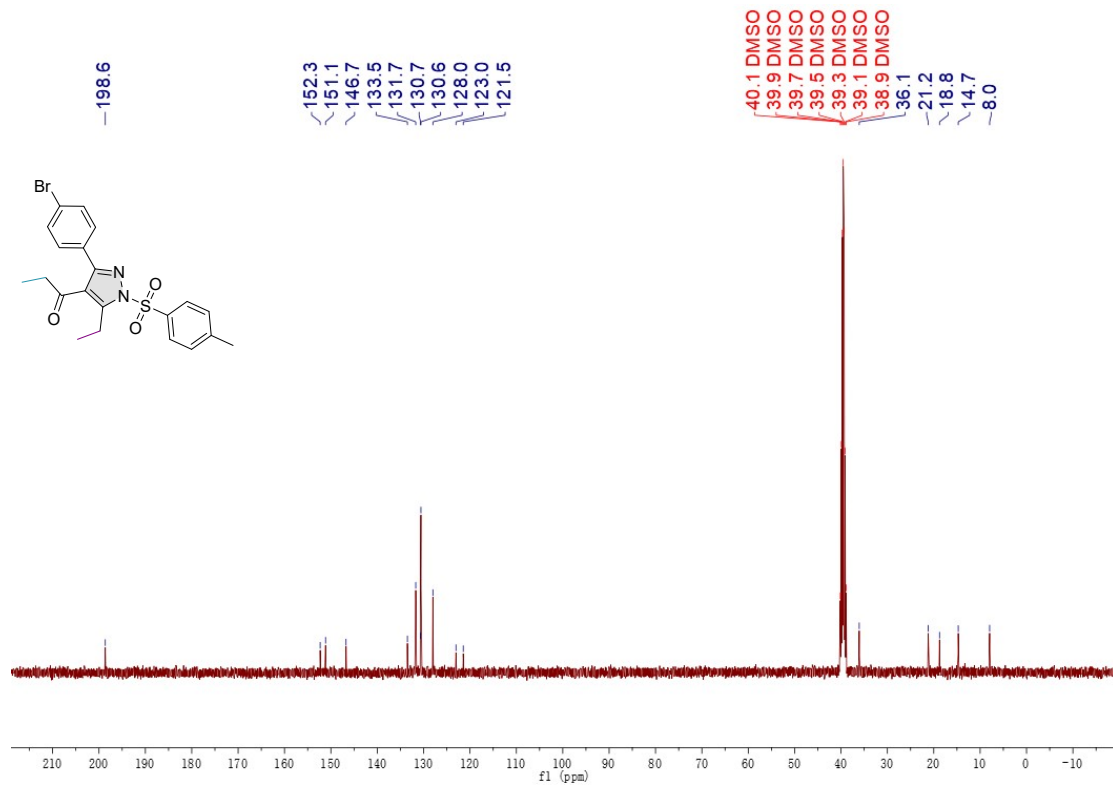

<sup>13</sup>C NMR (100 MHz, DMSO-*d*<sub>6</sub>)

ethyl 3-(4-bromophenyl)-5-methyl-1-tosyl-1H-pyrazole-4-carboxylate (4c)

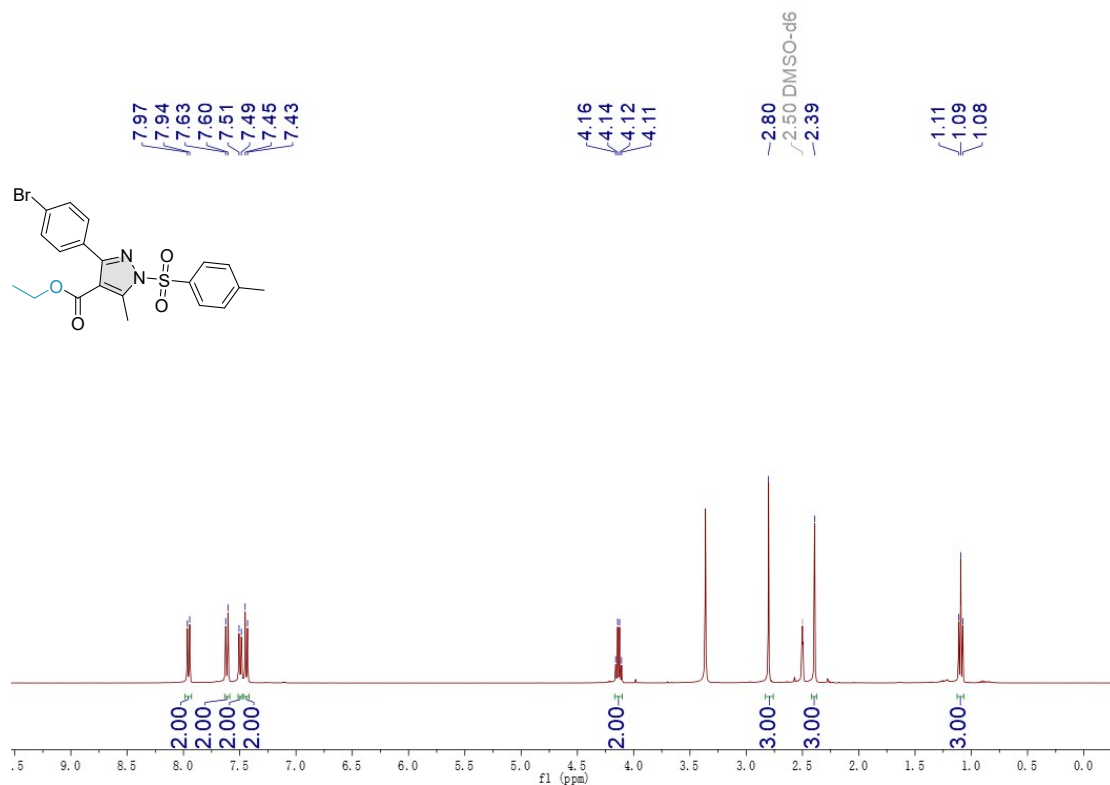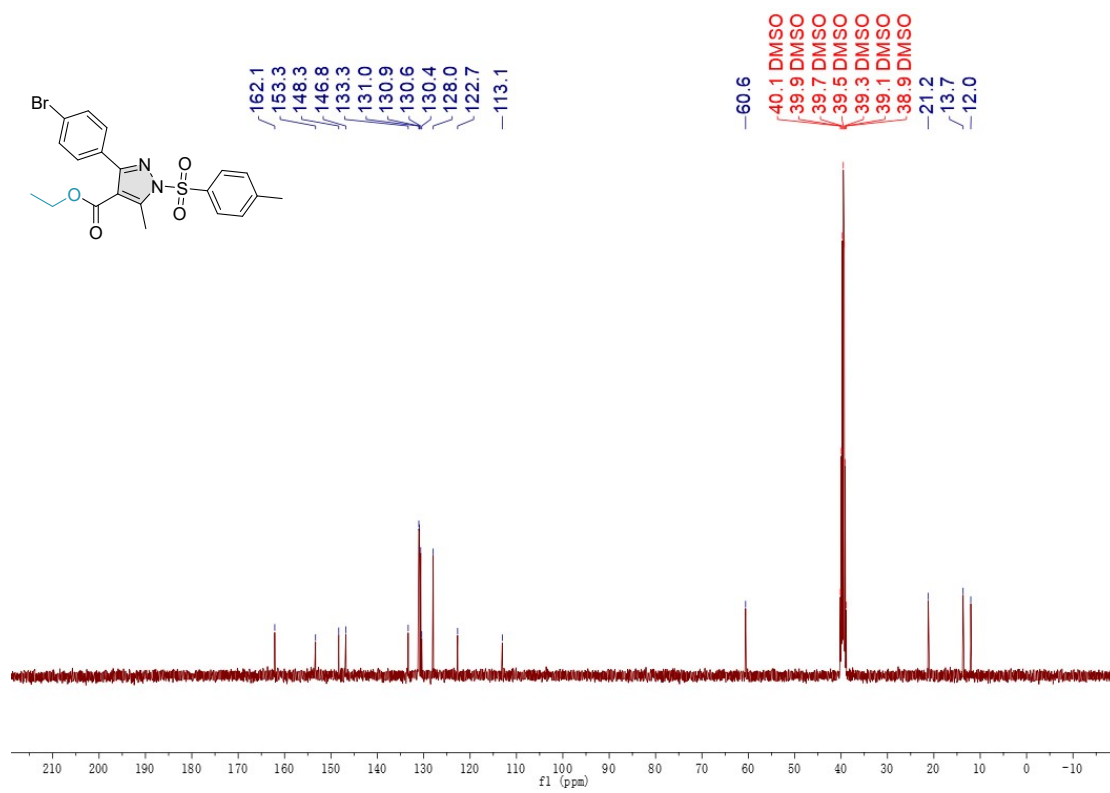

(3-(4-bromophenyl)-5-phenyl-1-tosyl-1H-pyrazol-4-yl)(phenyl)methanone (4d)

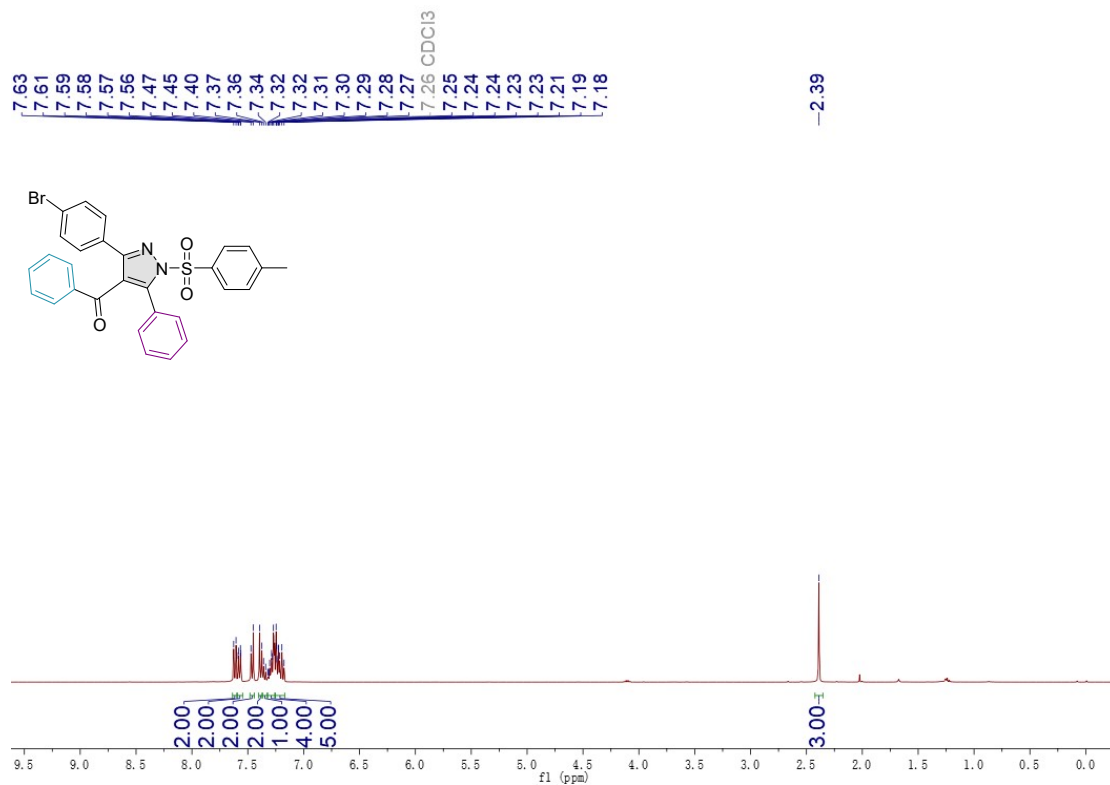

<sup>1</sup>H NMR (400 MHz, CDCl<sub>3</sub>)

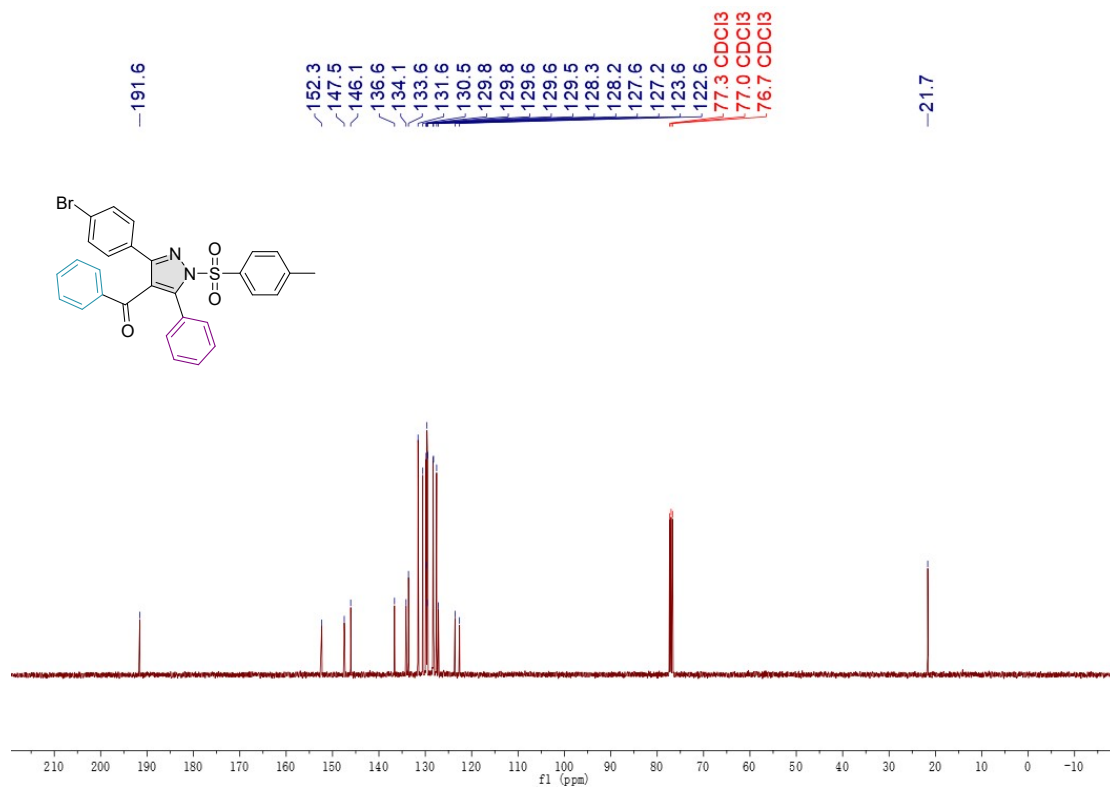

<sup>13</sup>C NMR (100 MHz, CDCl<sub>3</sub>)

(3-(4-bromophenyl)-5-methyl-1H-pyrazol-4-yl)(phenyl)methanone (4e)

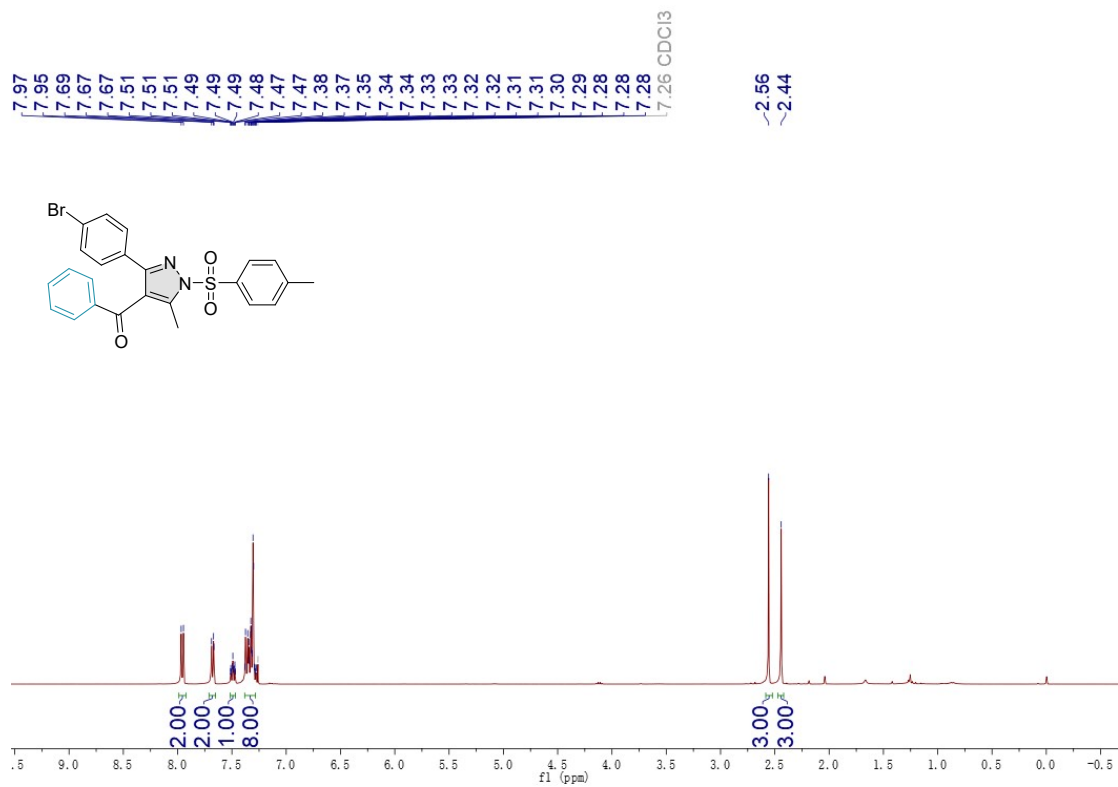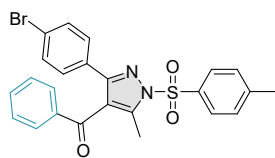

<sup>1</sup>H NMR (400 MHz, CDCl<sub>3</sub>)

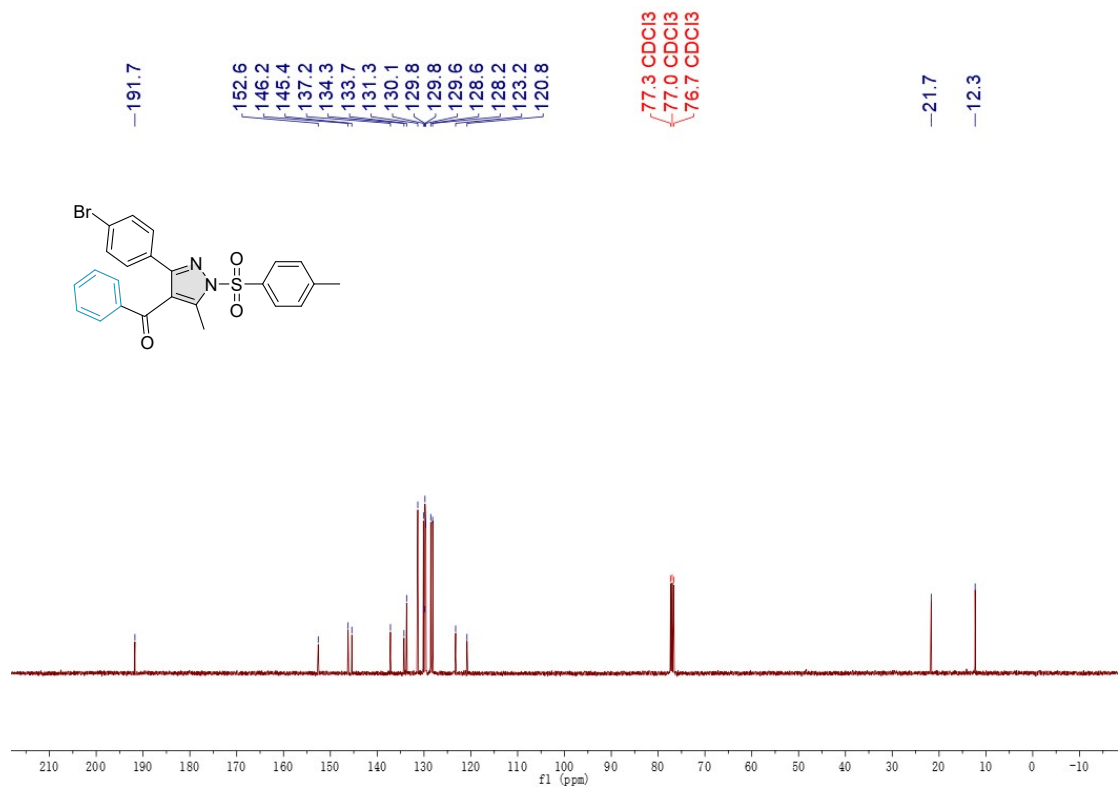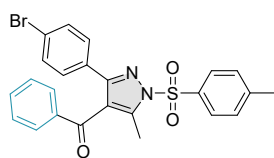

<sup>13</sup>C NMR (100 MHz, CDCl<sub>3</sub>)

(3-(4-bromophenyl)-5-methyl-1H-pyrazol-4-yl)(cyclopropyl)methanone (4f)

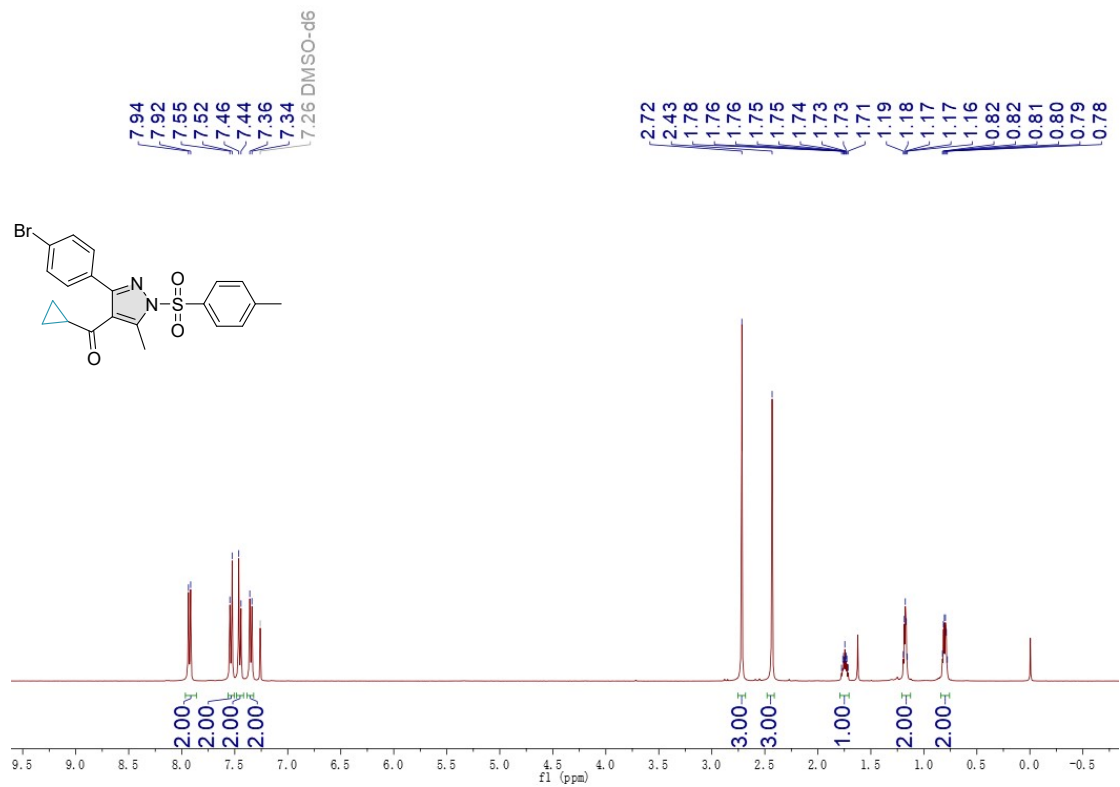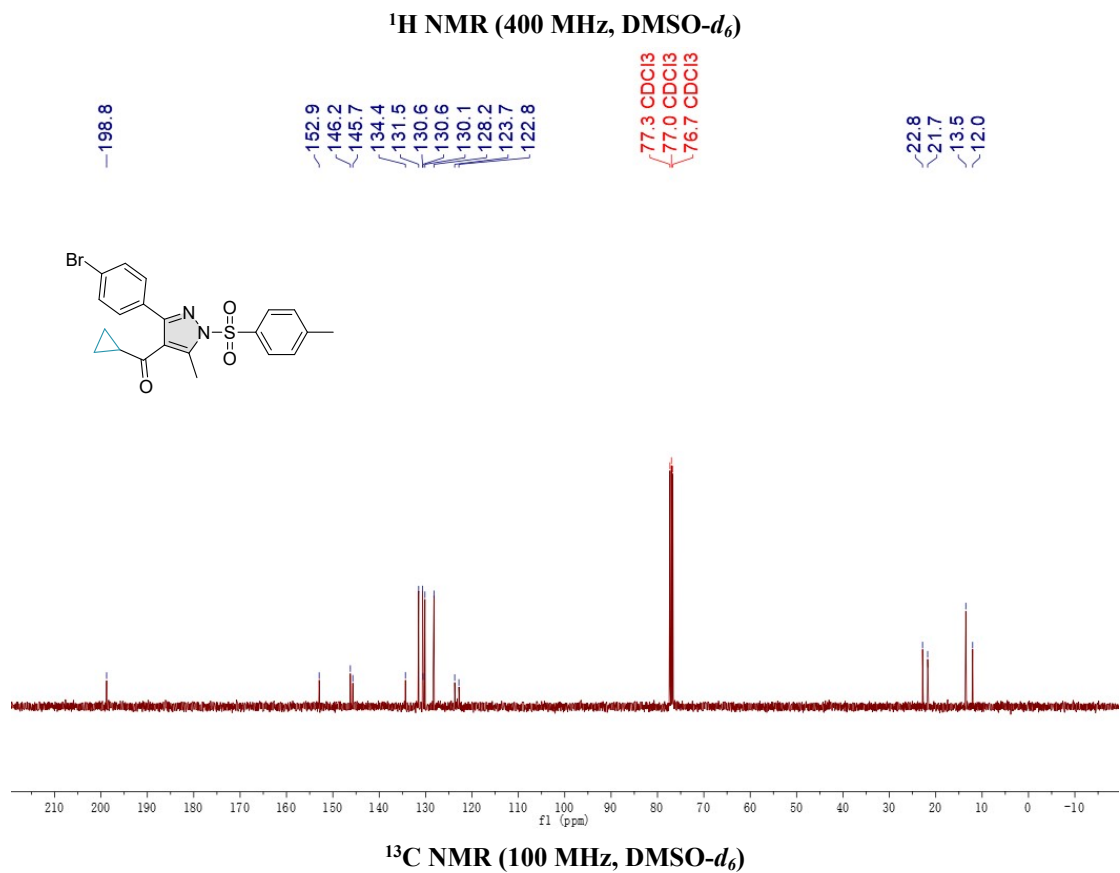

**methyl 3-(4-bromophenyl)-5-ethyl-1-tosyl-1H-pyrazole-4-carboxylate (4g)**



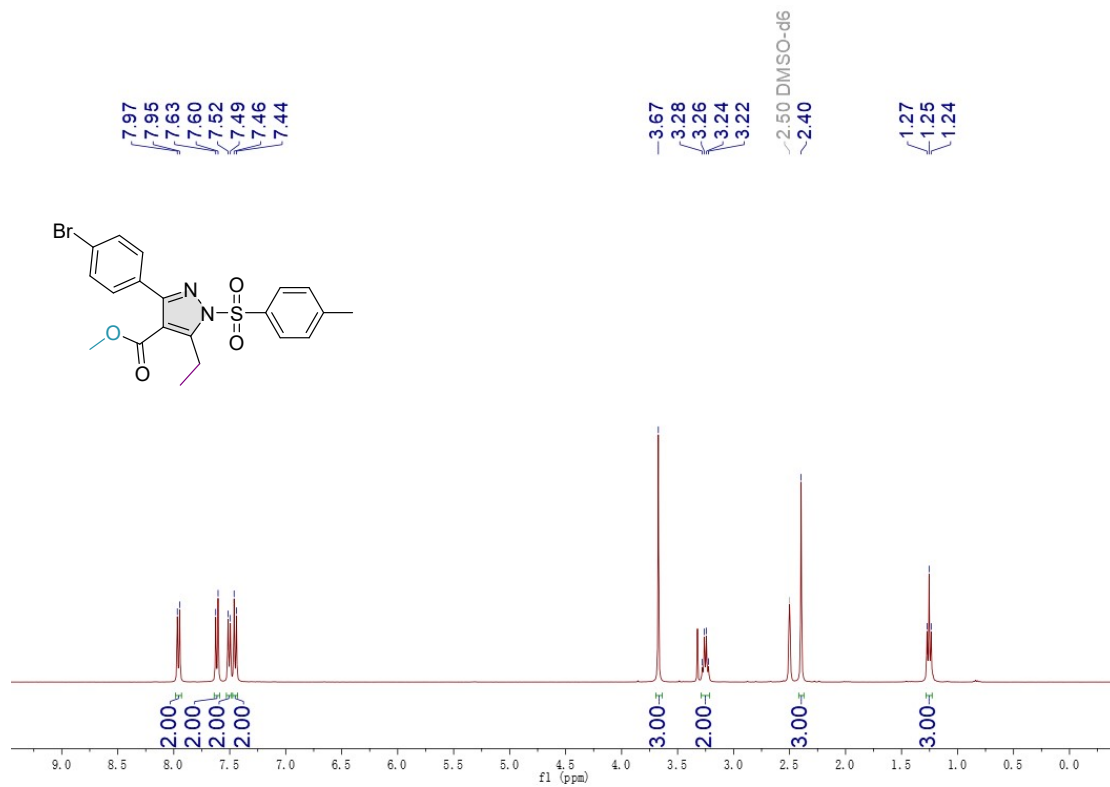

<sup>1</sup>H NMR (400 MHz, DMSO-*d*<sub>6</sub>)

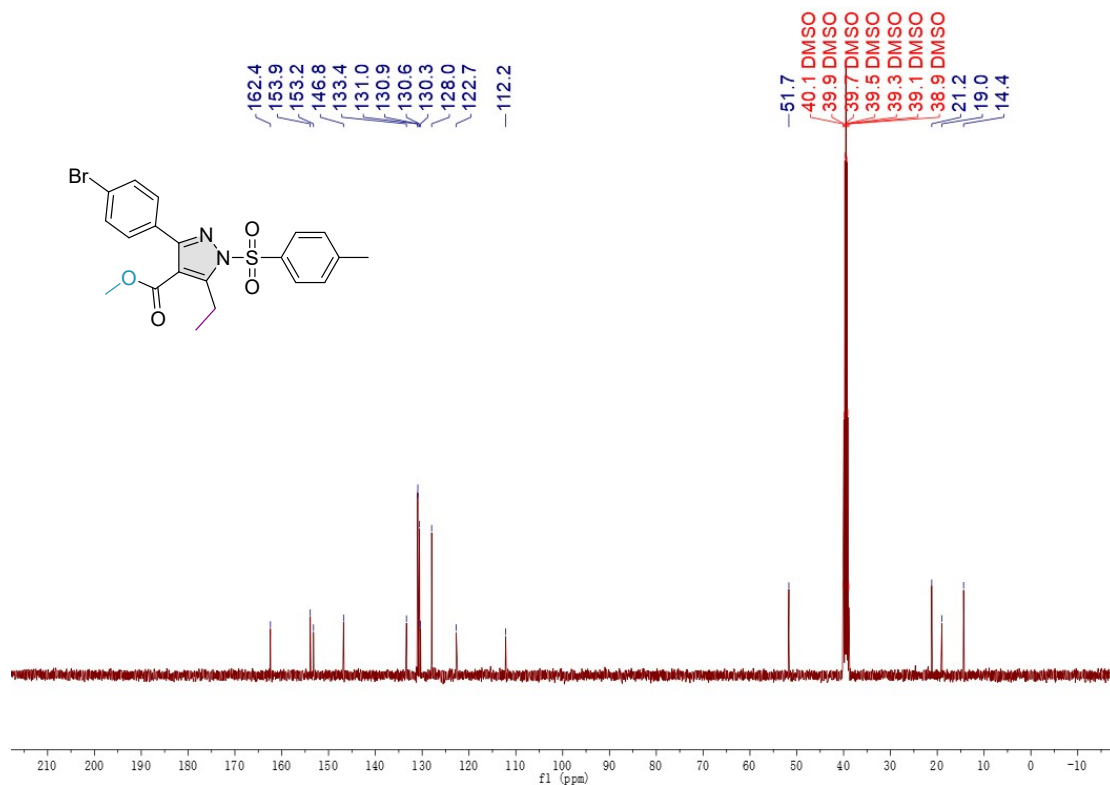

<sup>13</sup>C NMR (100 MHz, DMSO-*d*<sub>6</sub>)

allyl 3-(4-bromophenyl)-5-methyl-1-tosyl-1H-pyrazole-4-carboxylate (4h)

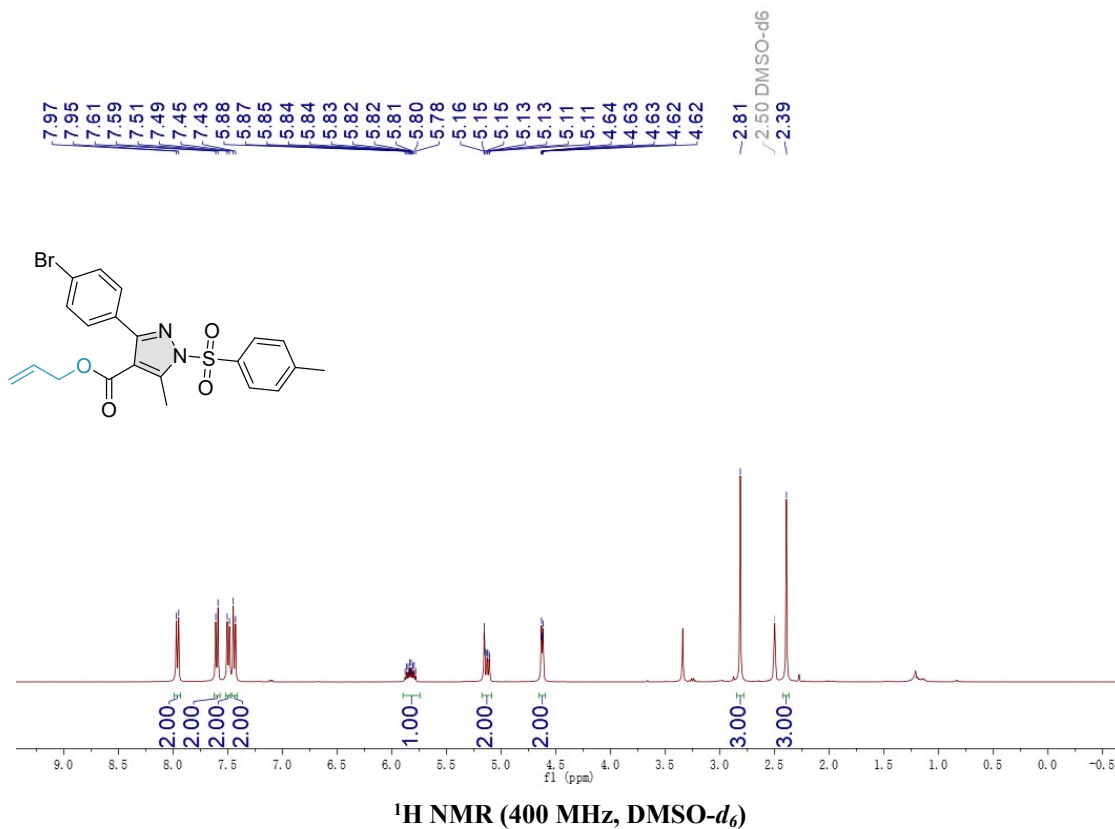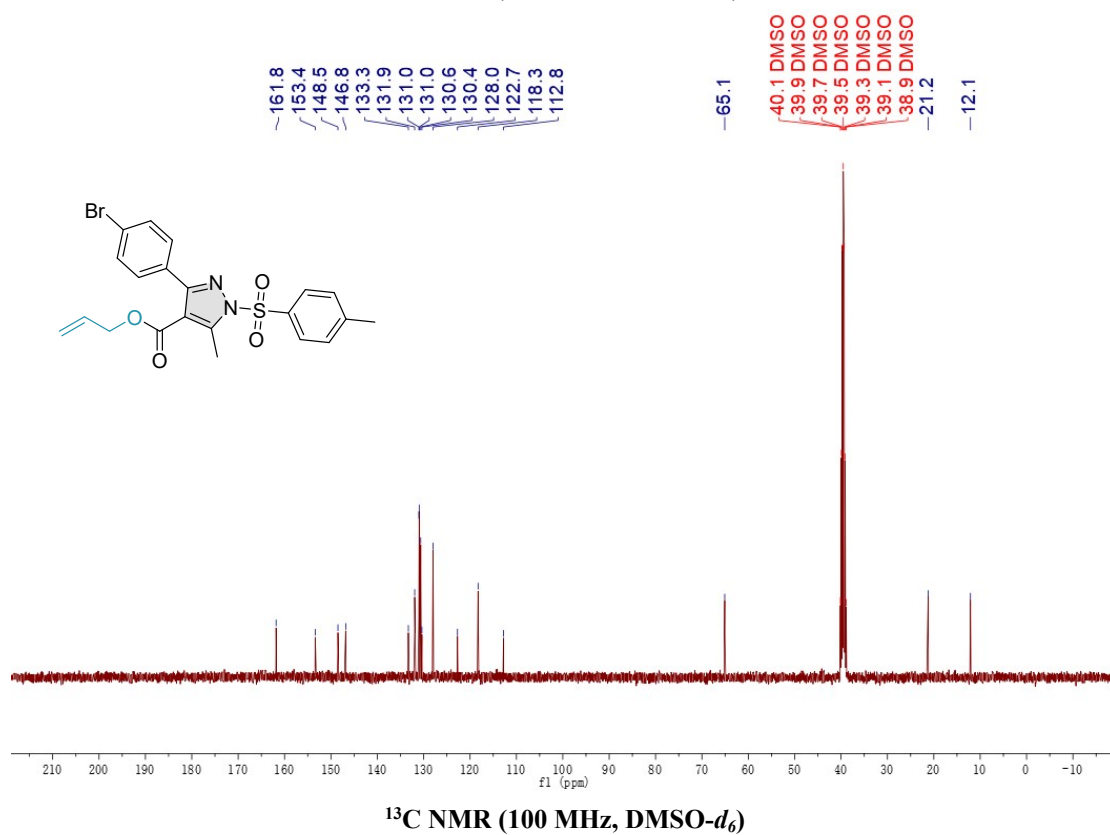

**tert-butyl 3-(4-bromophenyl)-5-methyl-1-tosyl-1H-pyrazole-4-carboxylate (4i)**

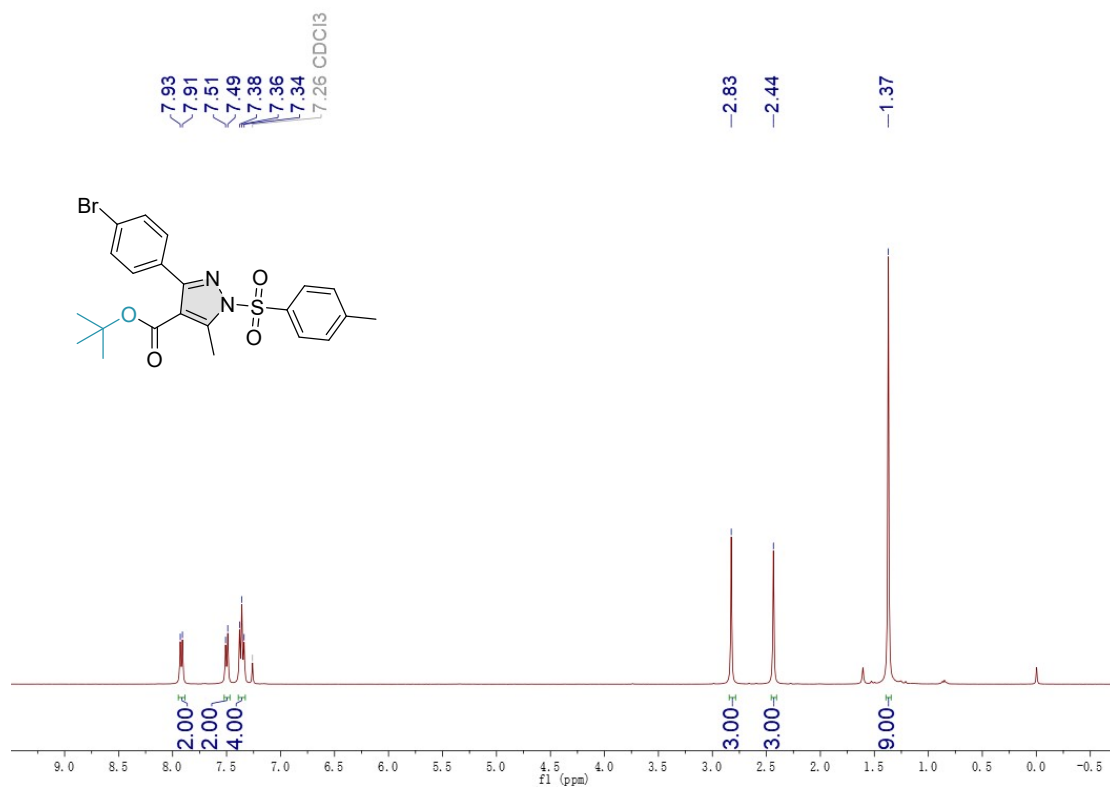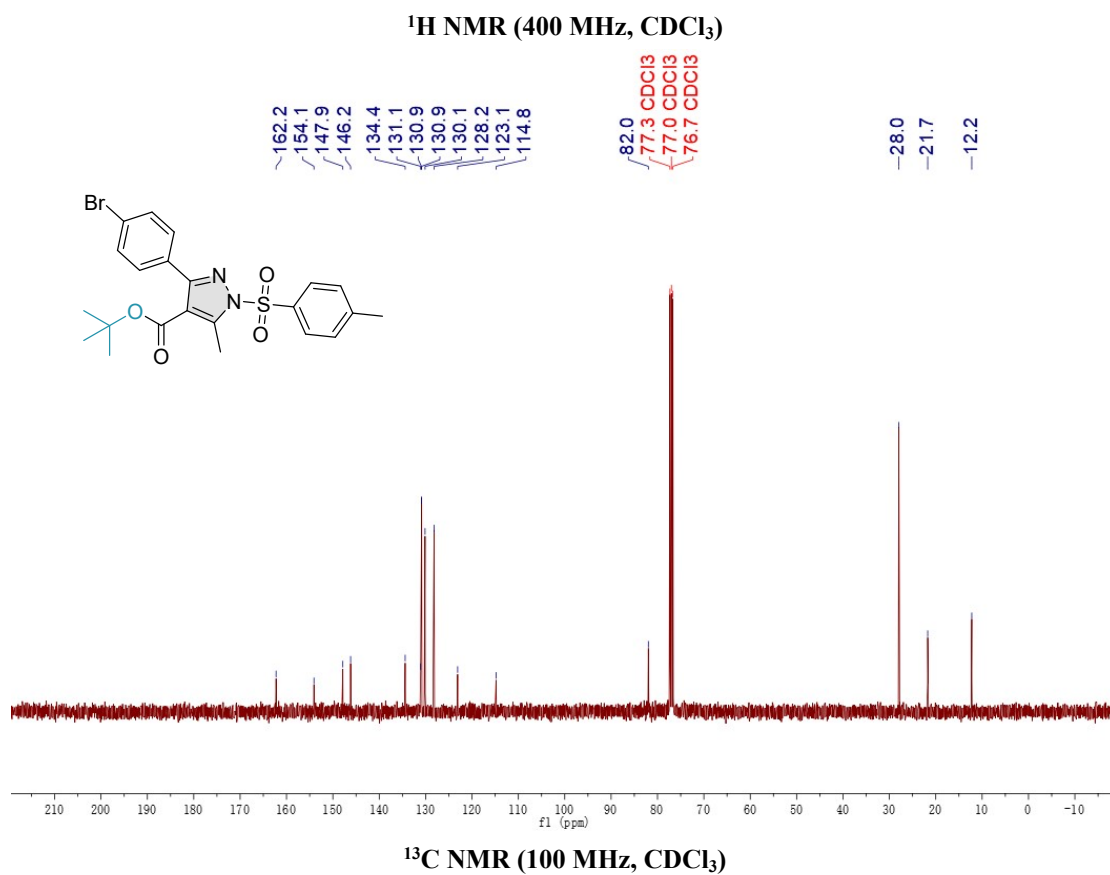

ethyl 3-(4-bromophenyl)-5-propyl-1-tosyl-1H-pyrazole-4-carboxylate (4j)

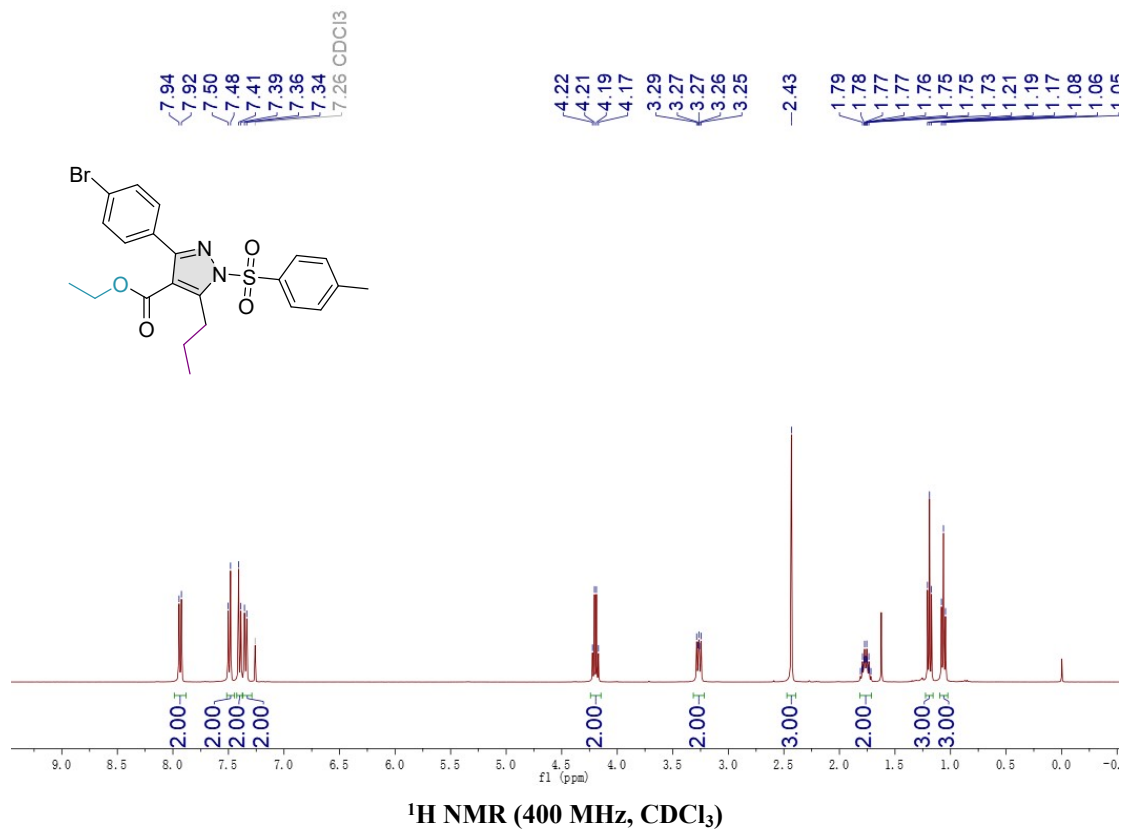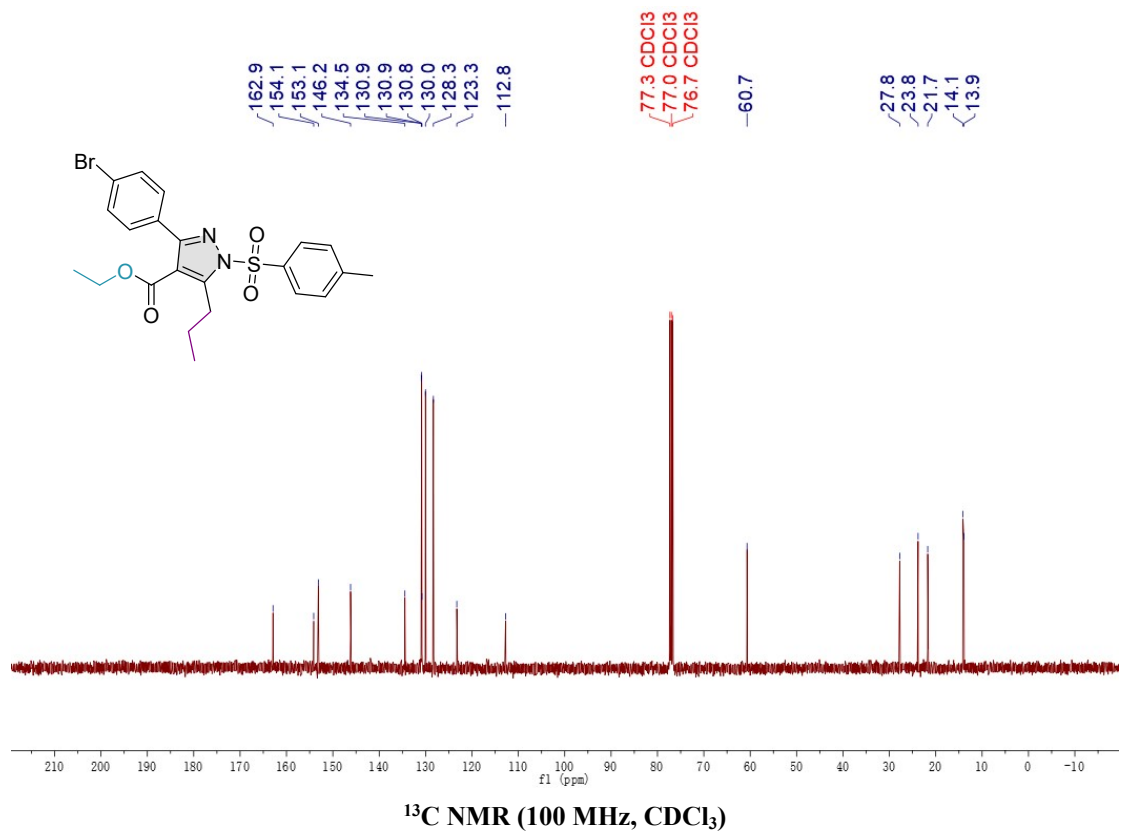

**2-methoxyethyl 3-(4-bromophenyl)-5-methyl-1-tosyl-1H-pyrazole-4-carboxylate (4k)**

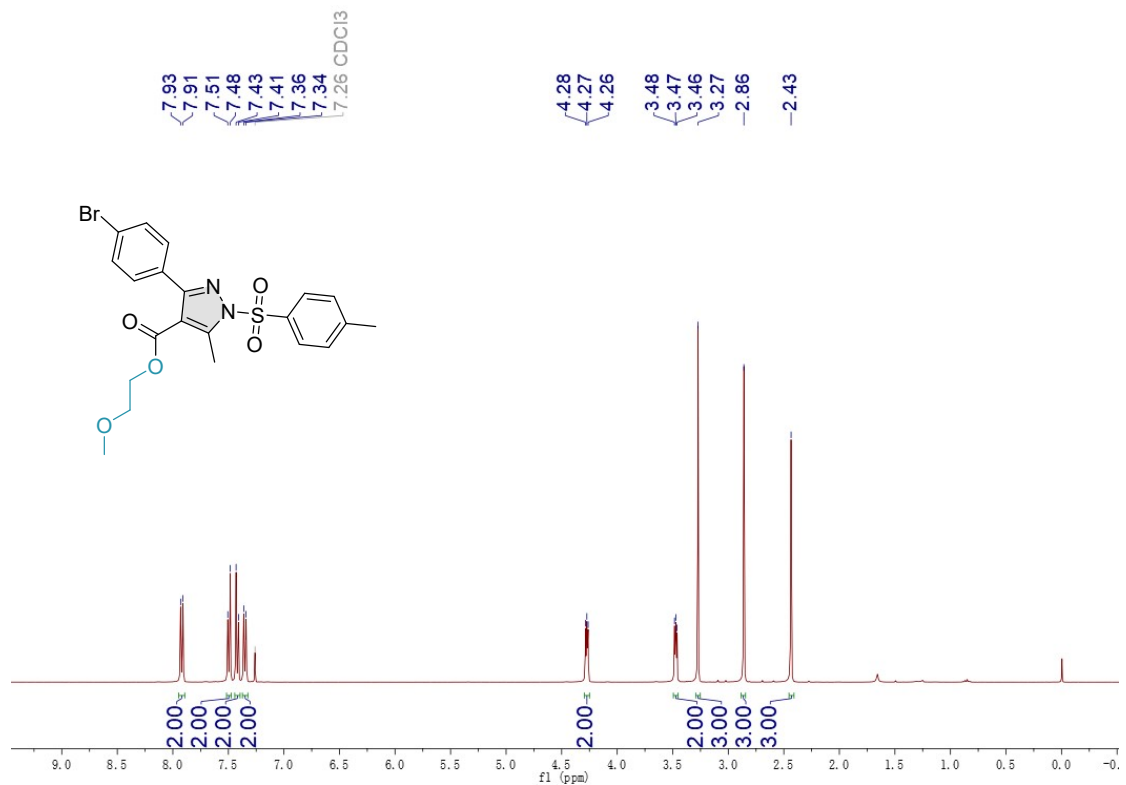

<sup>1</sup>H NMR (400 MHz, CDCl<sub>3</sub>)

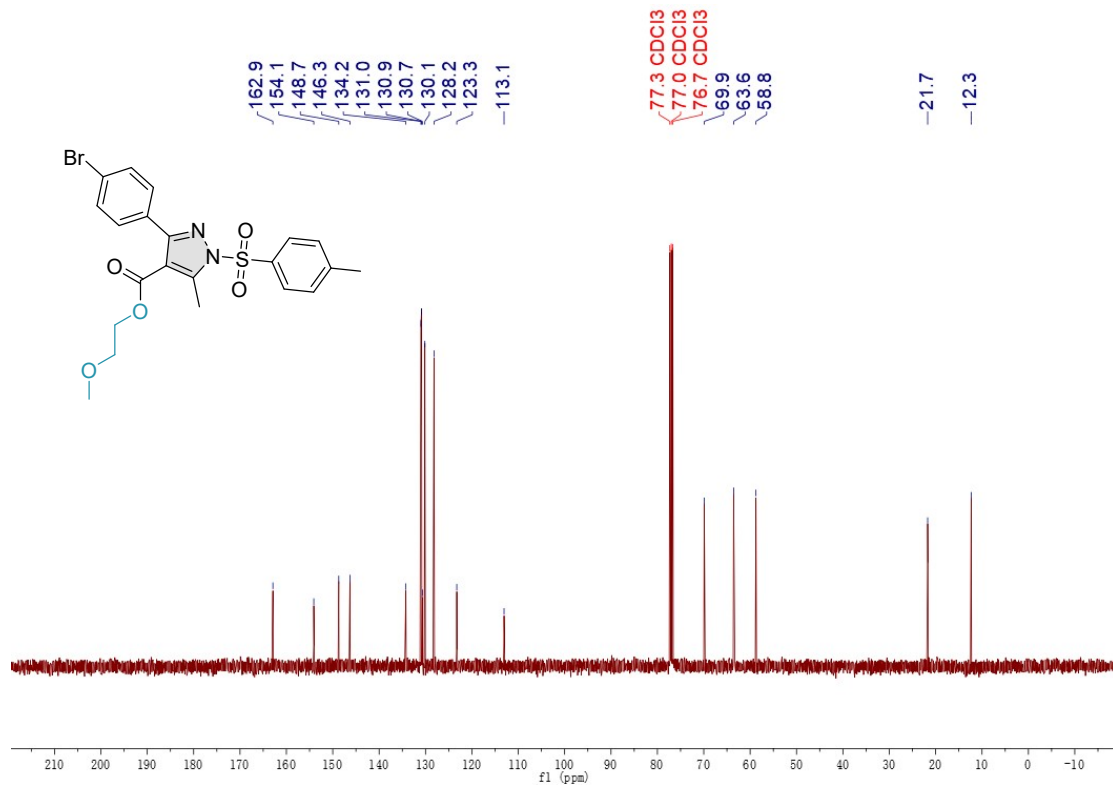

<sup>13</sup>C NMR (100 MHz, CDCl<sub>3</sub>)

ethyl 3-(4-bromophenyl)-5-(pyridin-4-yl)-1-tosyl-1H-pyrazole-4-carboxylate (4l)

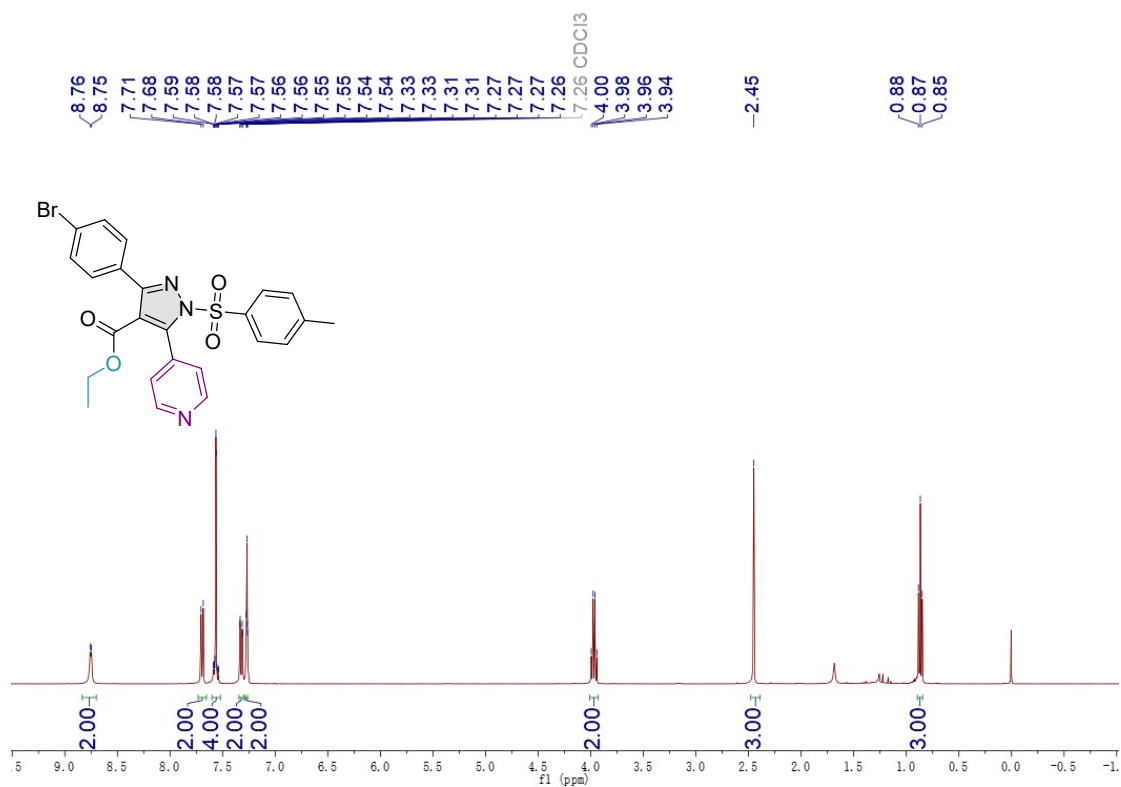

<sup>1</sup>H NMR (400 MHz, CDCl<sub>3</sub>)

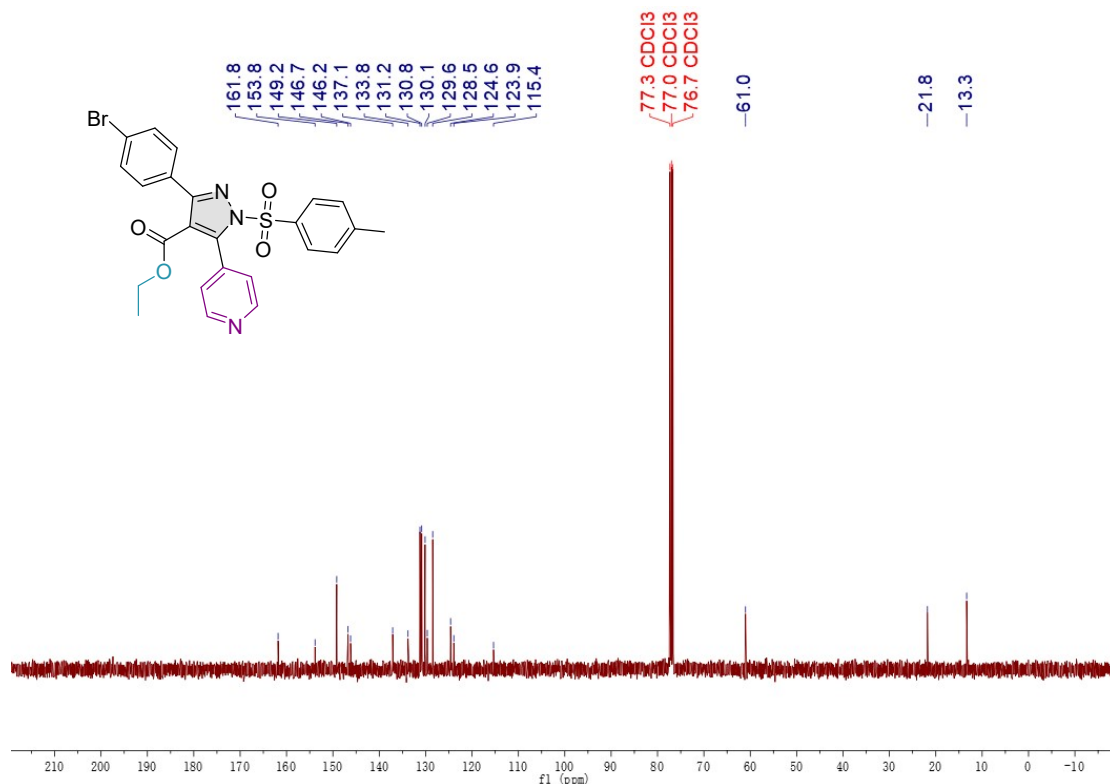

<sup>13</sup>C NMR (100 MHz, CDCl<sub>3</sub>)

benzyl 3-(4-bromophenyl)-5-methyl-1-tosyl-1H-pyrazole-4-carboxylate (4m)

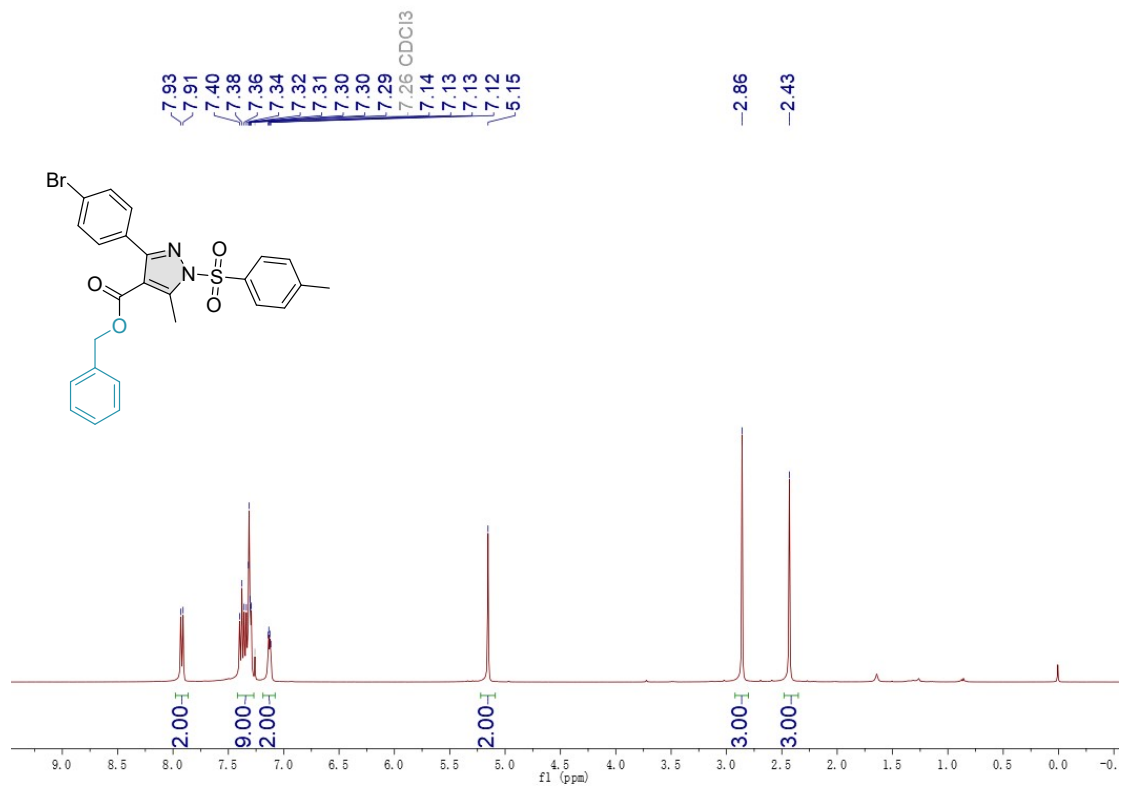

<sup>1</sup>H NMR (400 MHz, CDCl<sub>3</sub>)

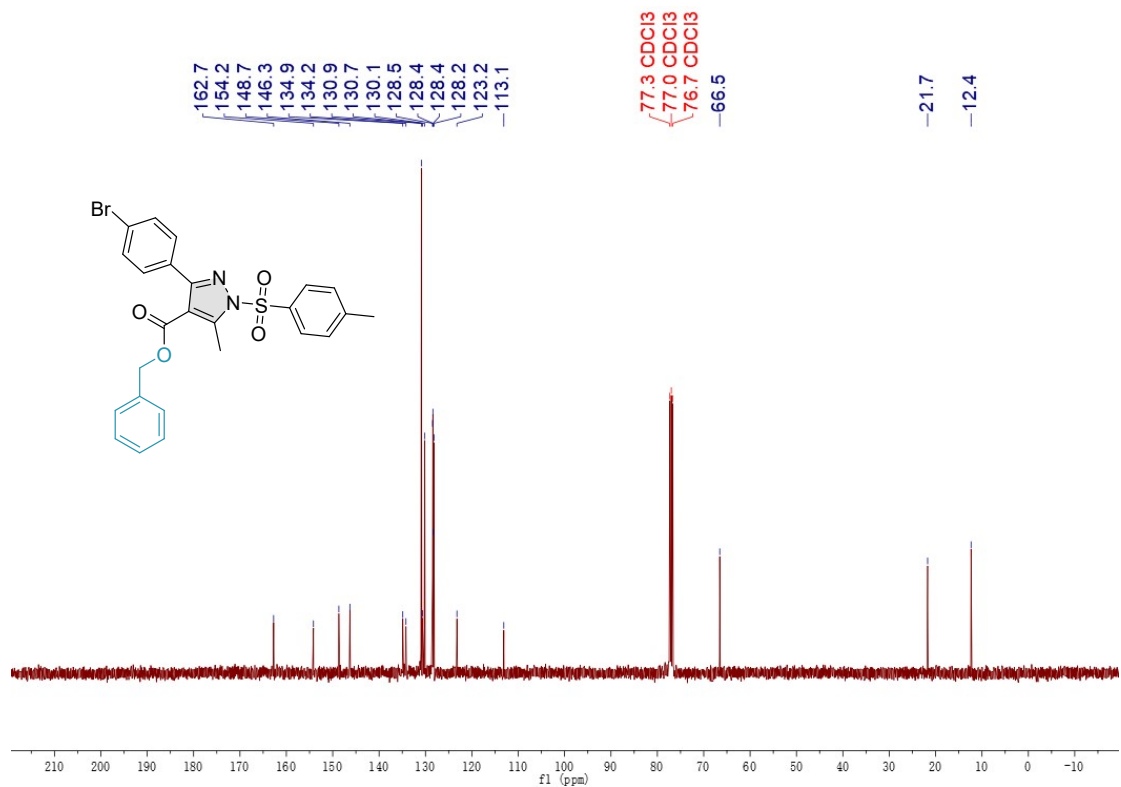

<sup>13</sup>C NMR (100 MHz, CDCl<sub>3</sub>)

1-(3-(4-bromophenyl)-5-methyl-1-tosyl-1H-pyrazol-4-yl)ethan-1-one (4n)

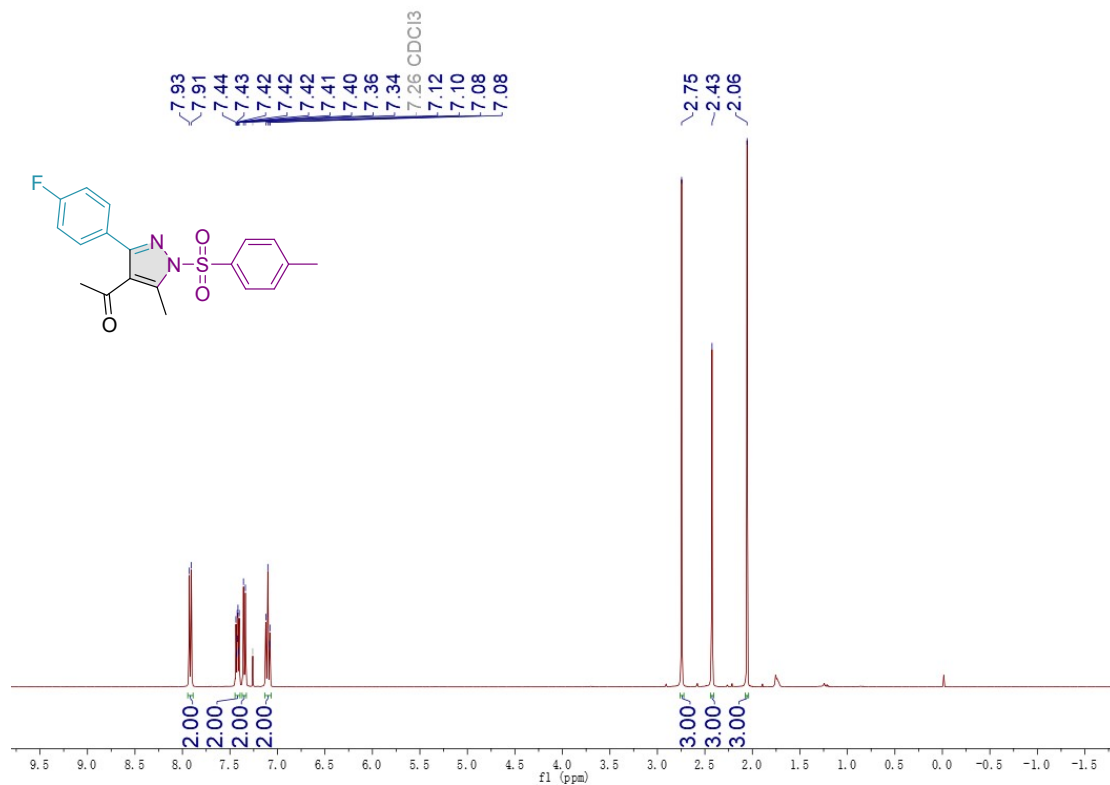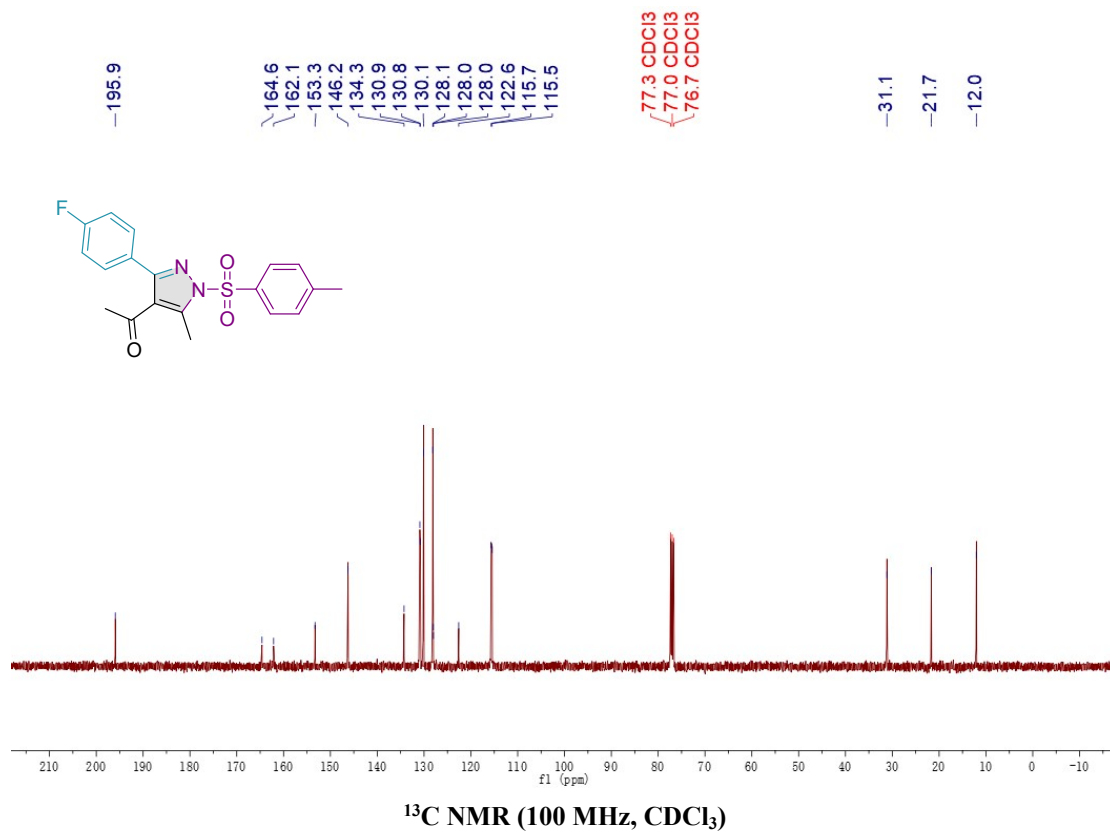



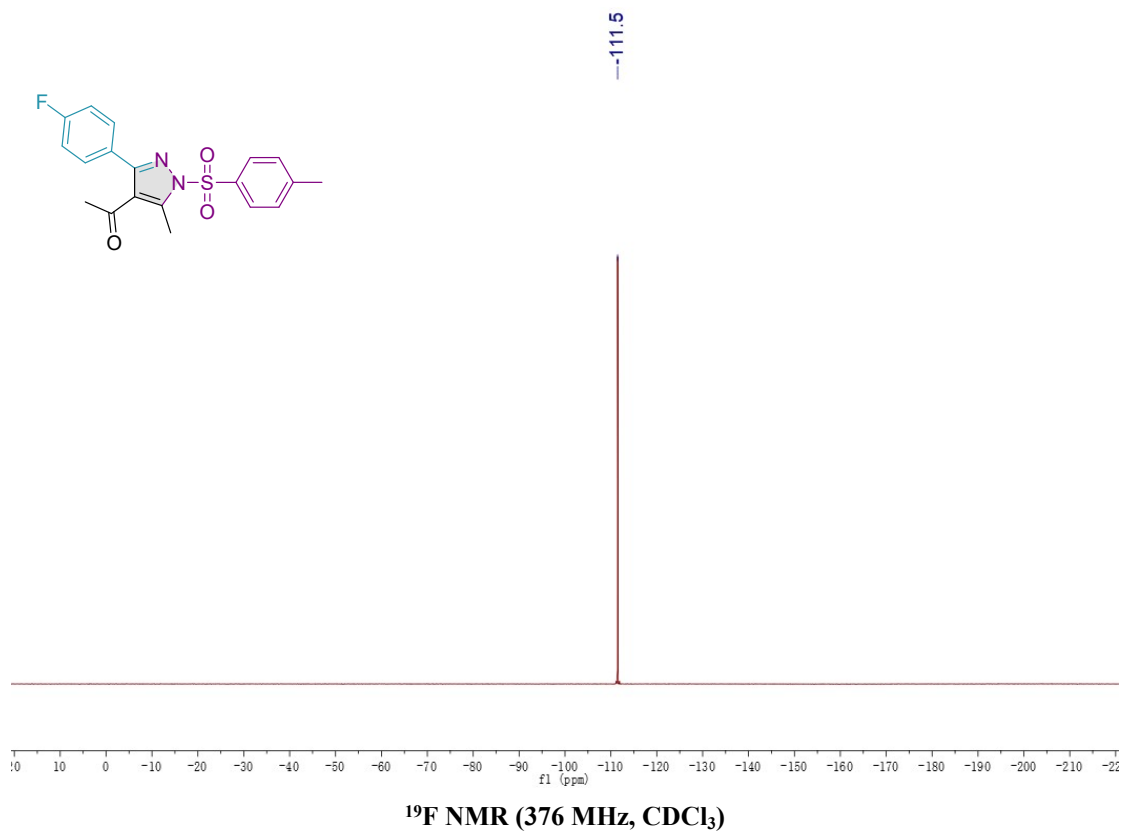

**1-(3-(4-chlorophenyl)-5-methyl-1-tosyl-1H-pyrazol-4-yl)ethan-1-one (4o)**

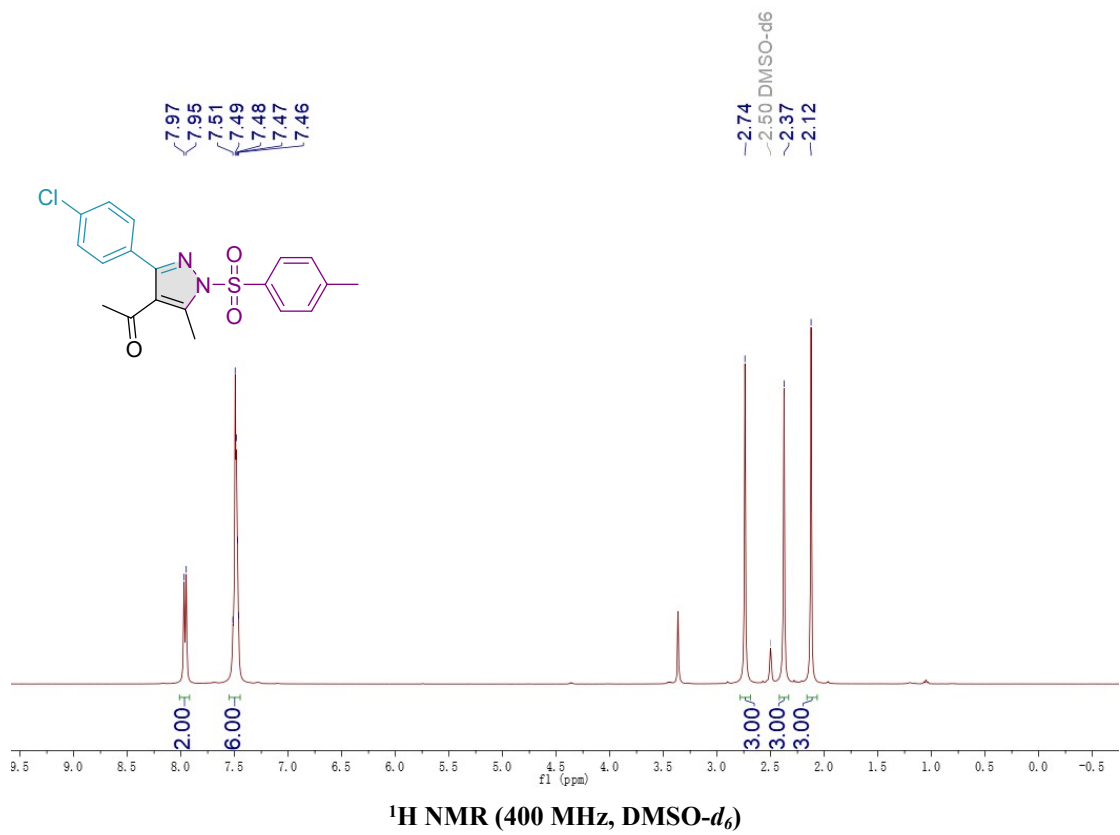

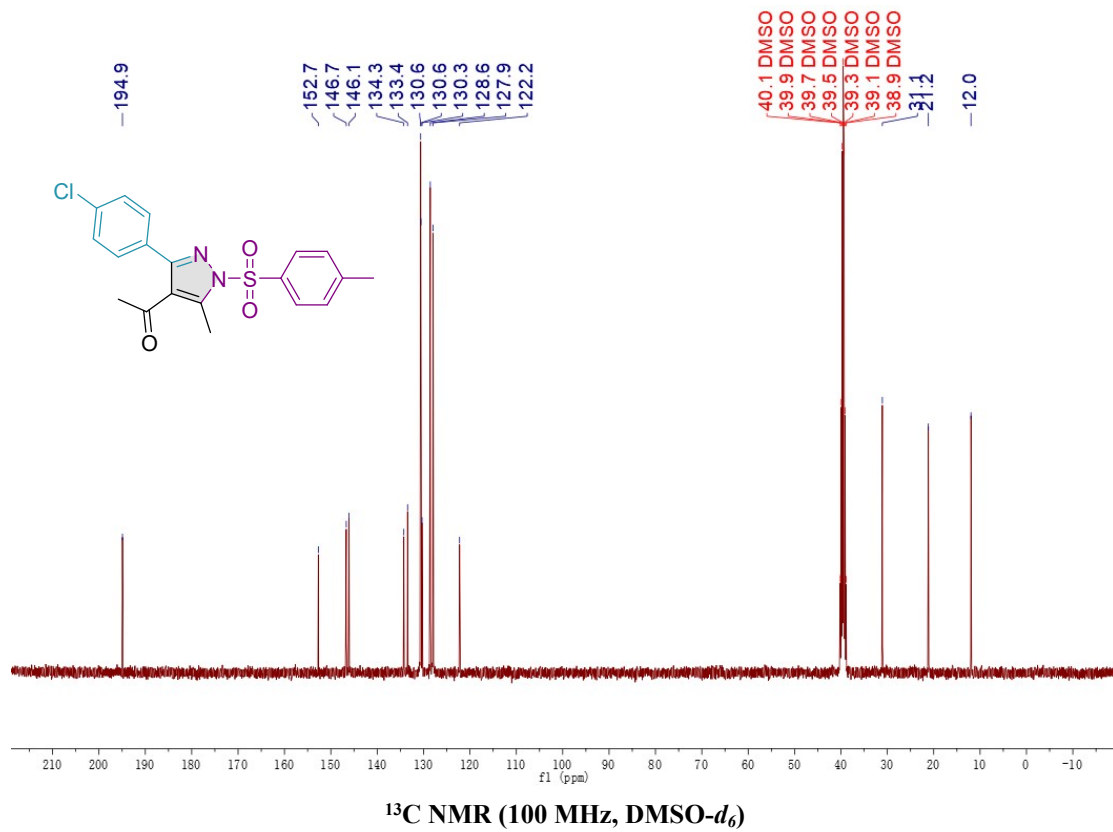

**1-(3-(4-iodophenyl)-5-methyl-1H-pyrazol-4-yl)ethan-1-one (4p)**

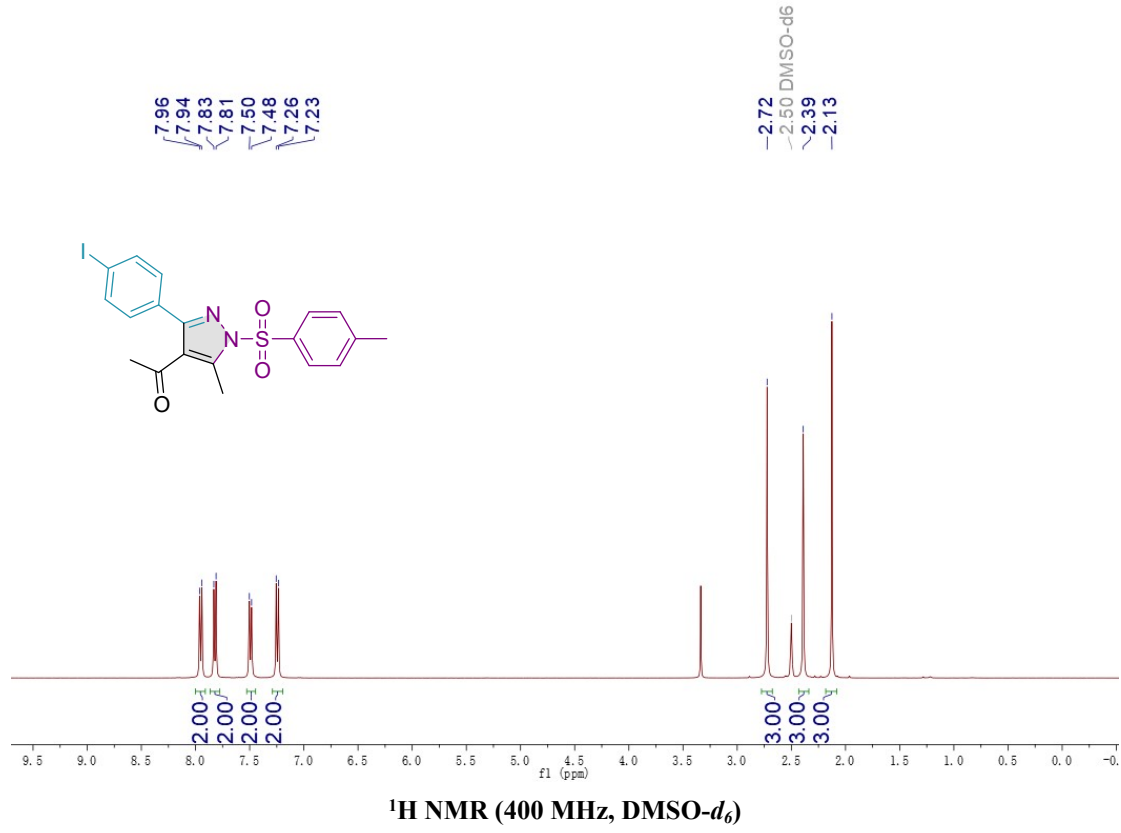

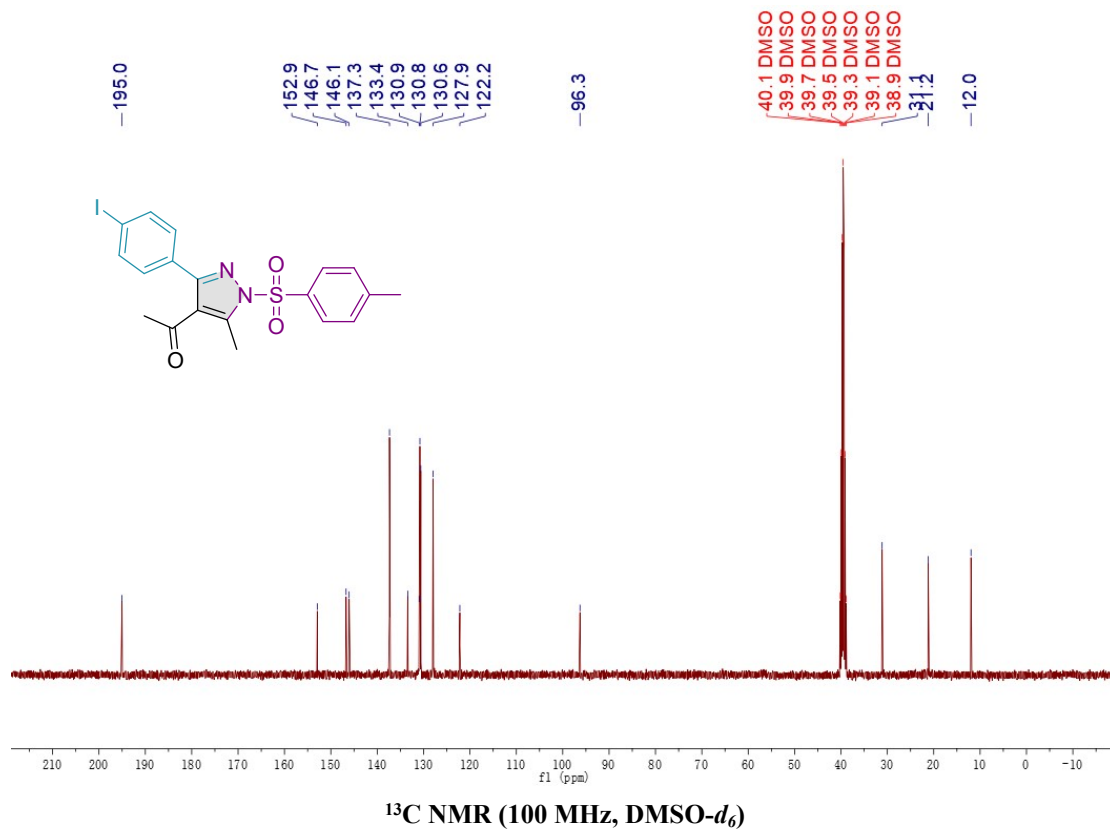

**1-(5-methyl-3-phenyl-1H-pyrazol-4-yl)ethan-1-one (4q)**

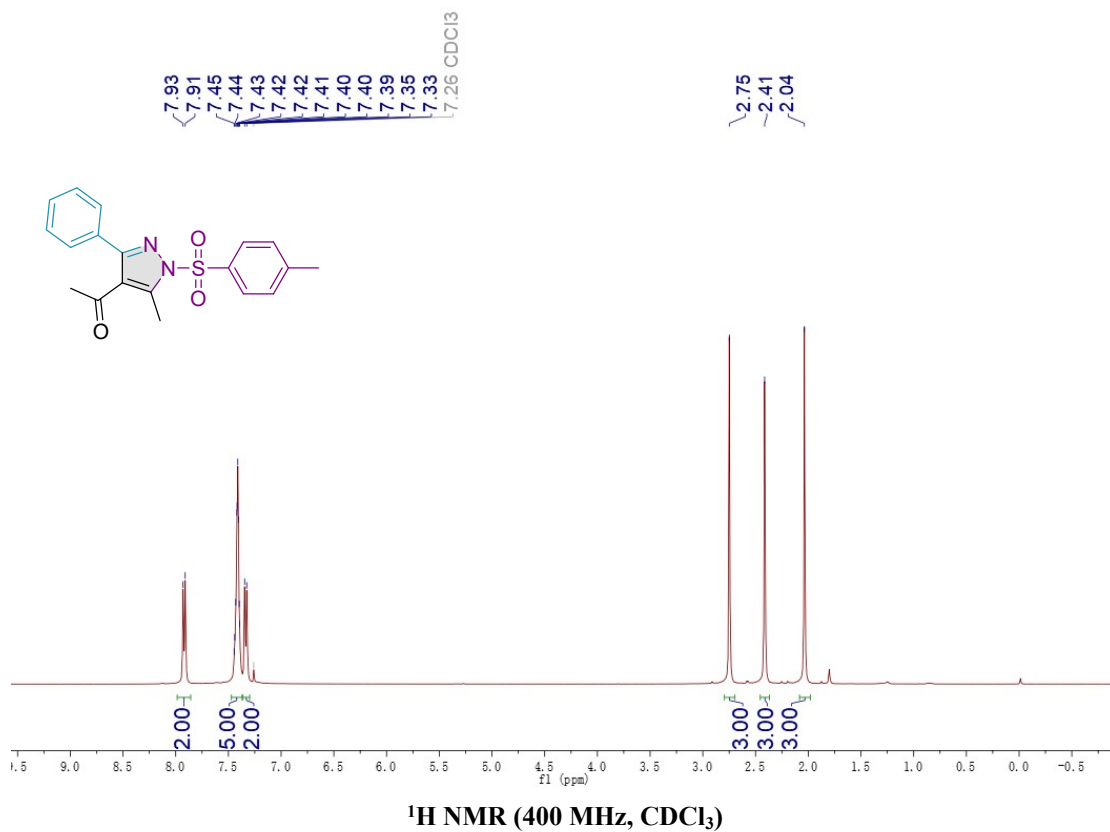

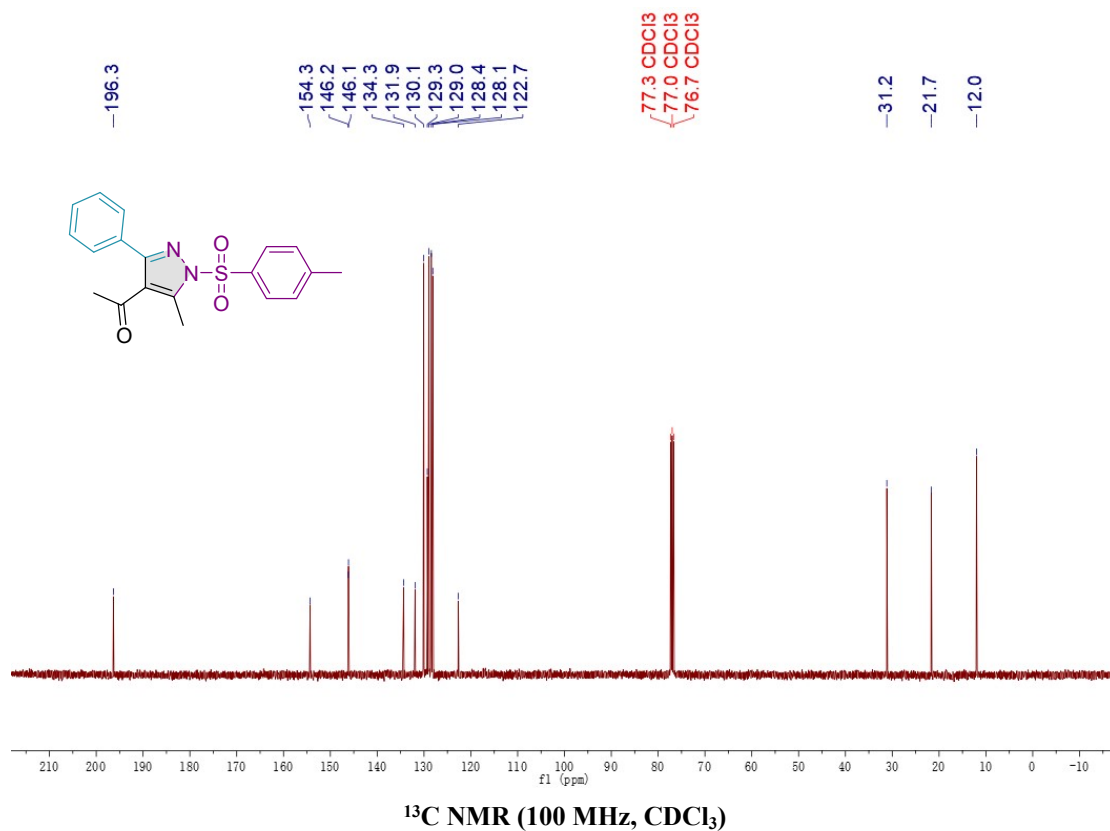

**1-(5-methyl-3-(p-tolyl)-1-tosyl-1H-pyrazol-4-yl)ethan-1-one (4r)**

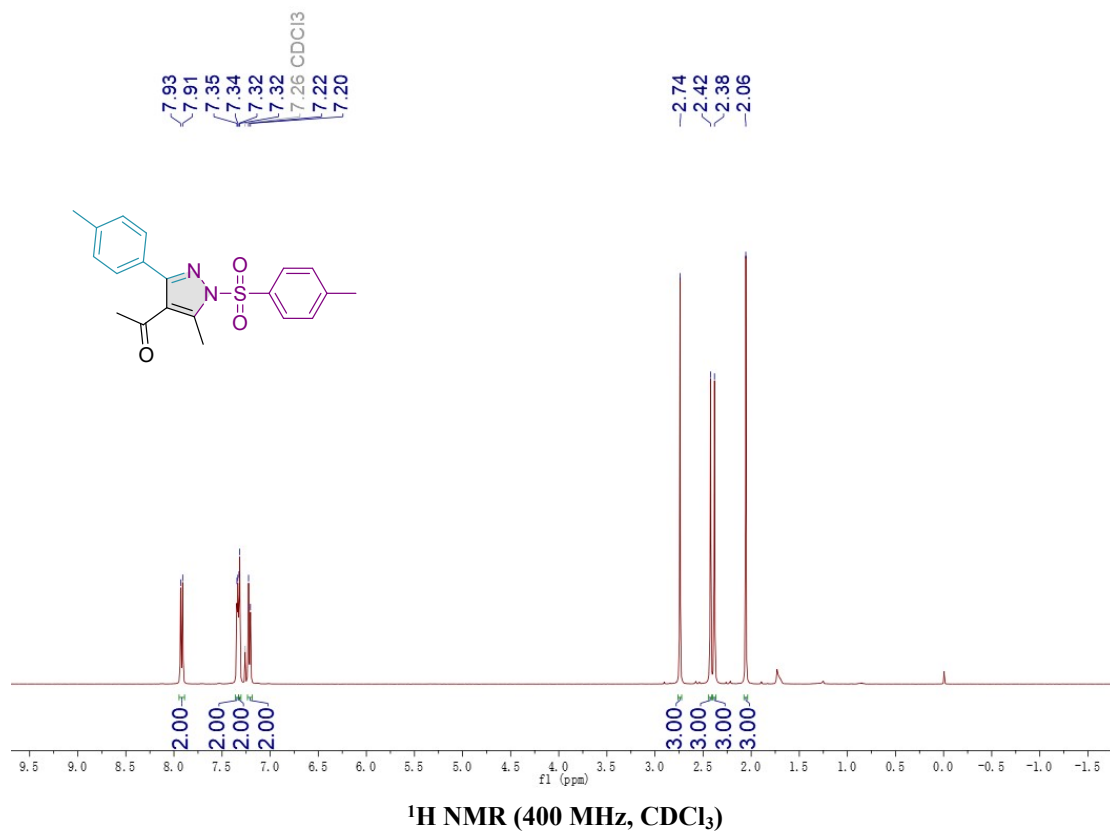

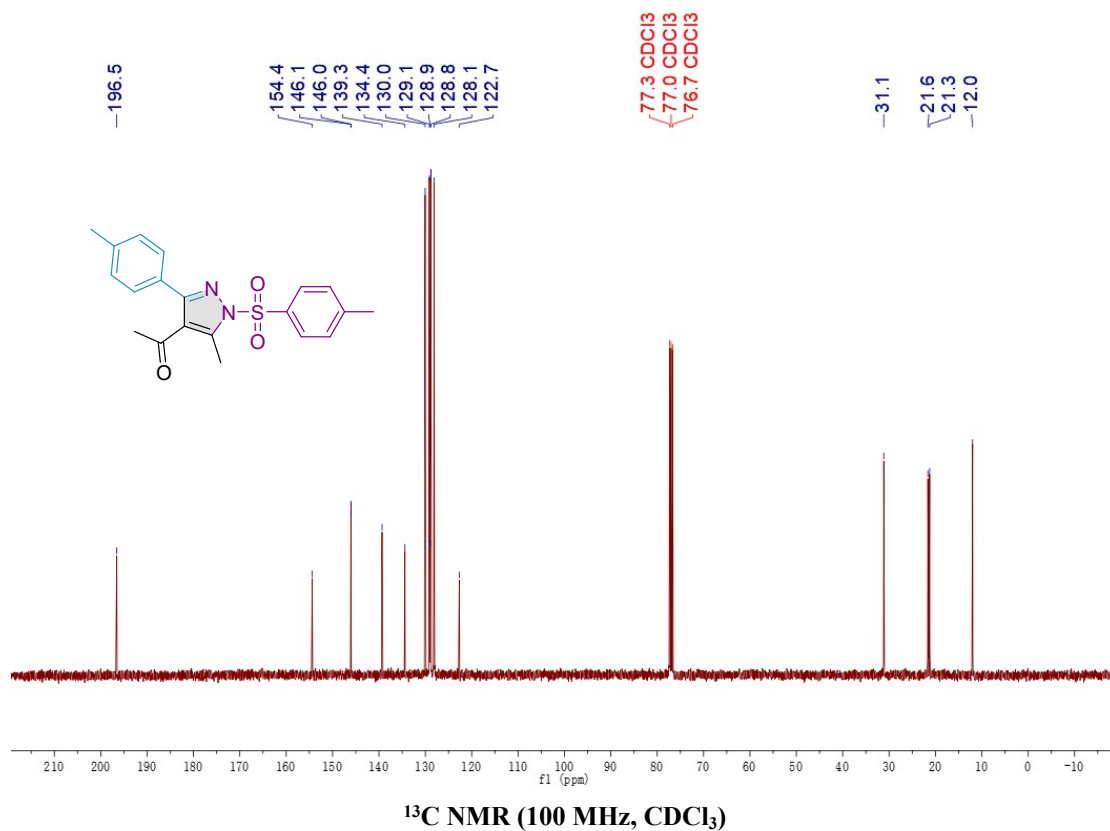

**1-(3-(4-methoxyphenyl)-5-methyl-1H-pyrazol-4-yl)ethan-1-one (4s)**

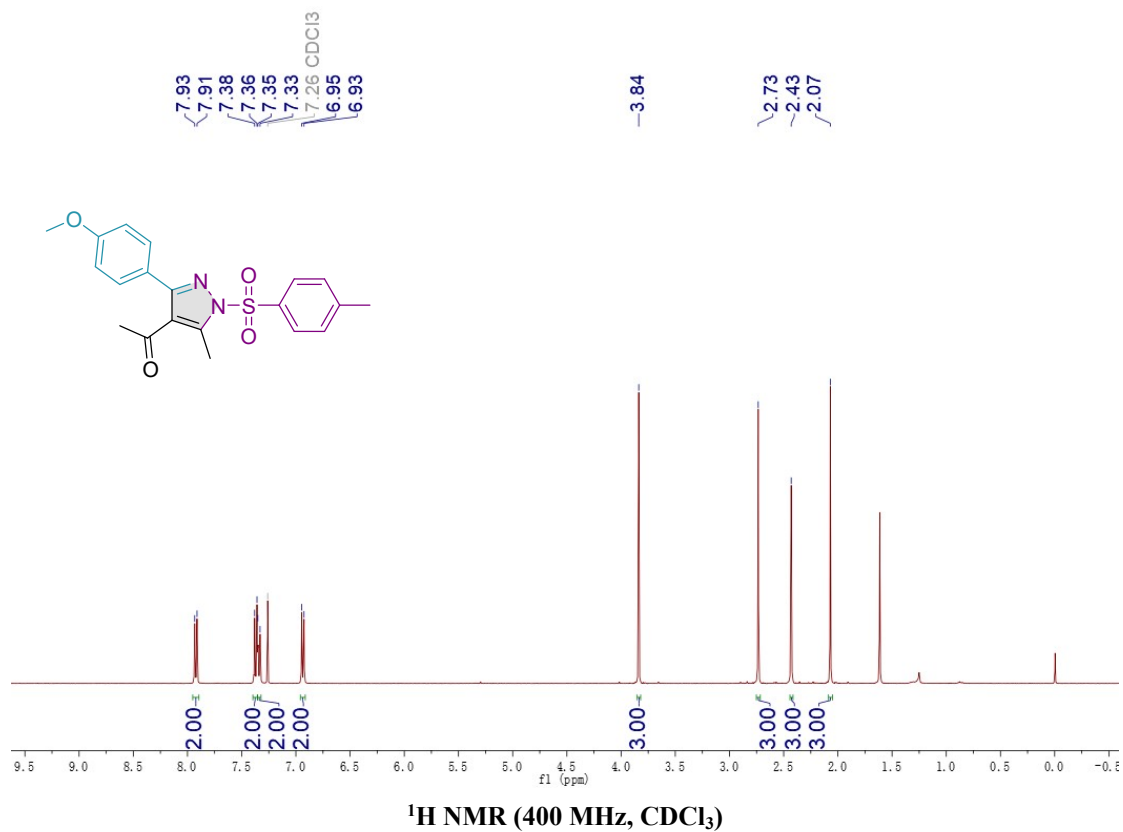

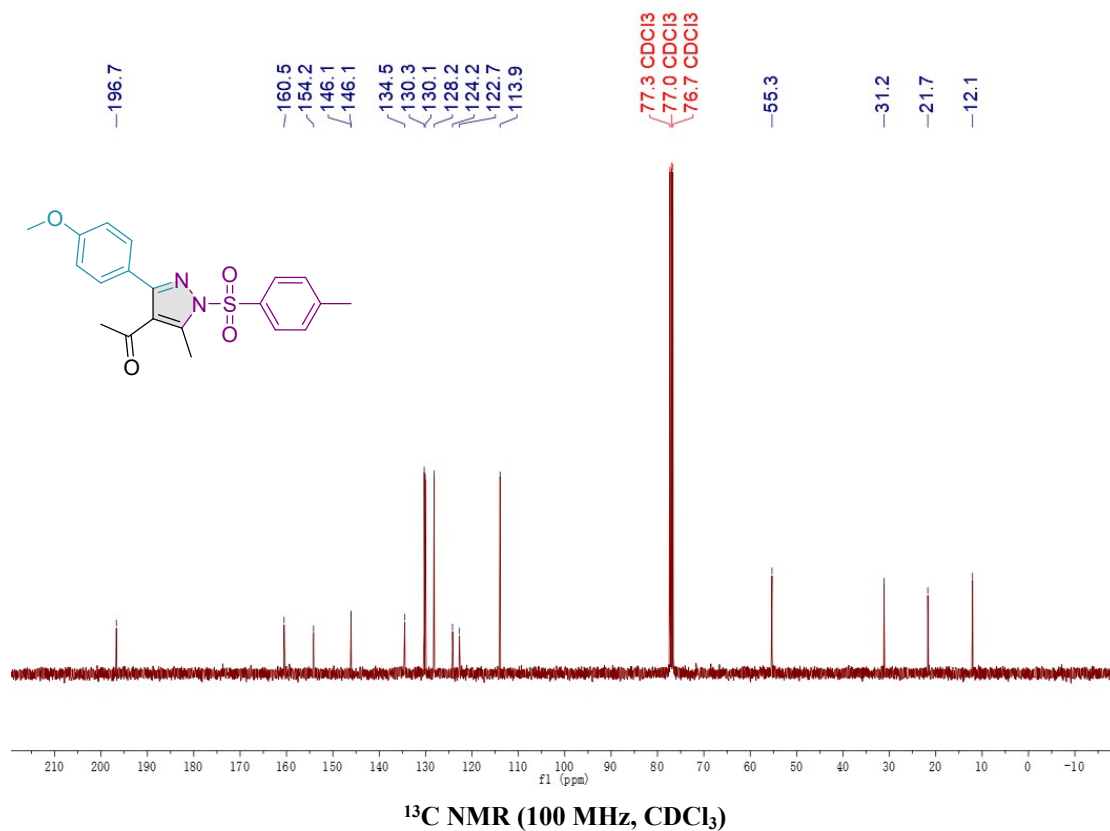

**1-(5-methyl-1-tosyl-3-(4-(trifluoromethoxy)phenyl)-1H-pyrazol-4-yl)ethan-1-one (4t)**

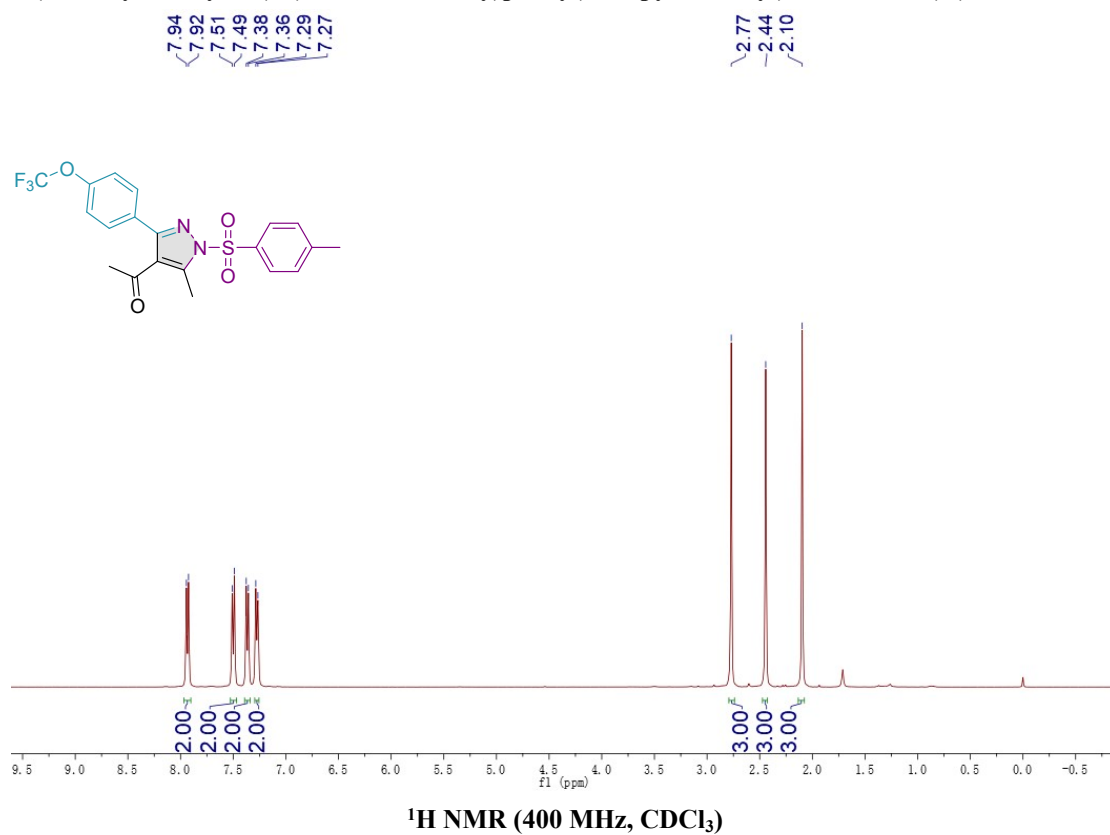

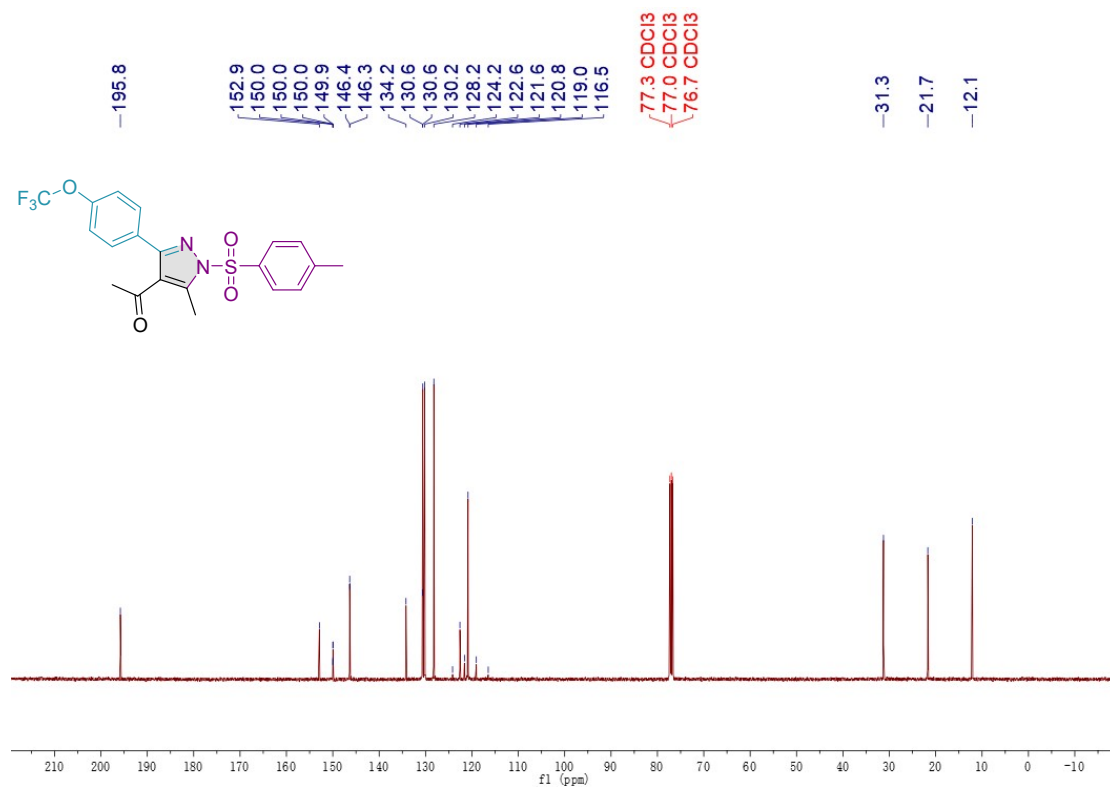

$^{13}\text{C}$  NMR (100 MHz,  $\text{CDCl}_3$ )

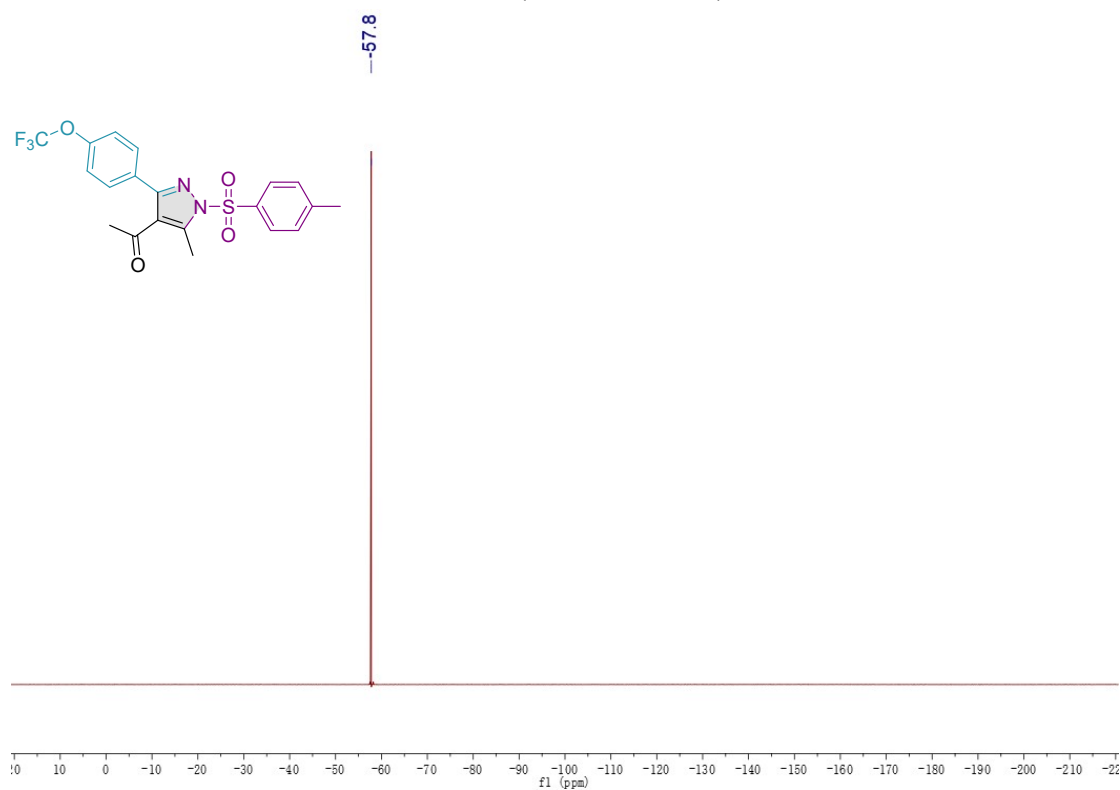

$^{19}\text{F}$  NMR (376 MHz,  $\text{CDCl}_3$ )

1-(5-methyl-3-(4-(methylthio)phenyl)-1-tosyl-1H-pyrazol-4-yl)ethan-1-one (4u)

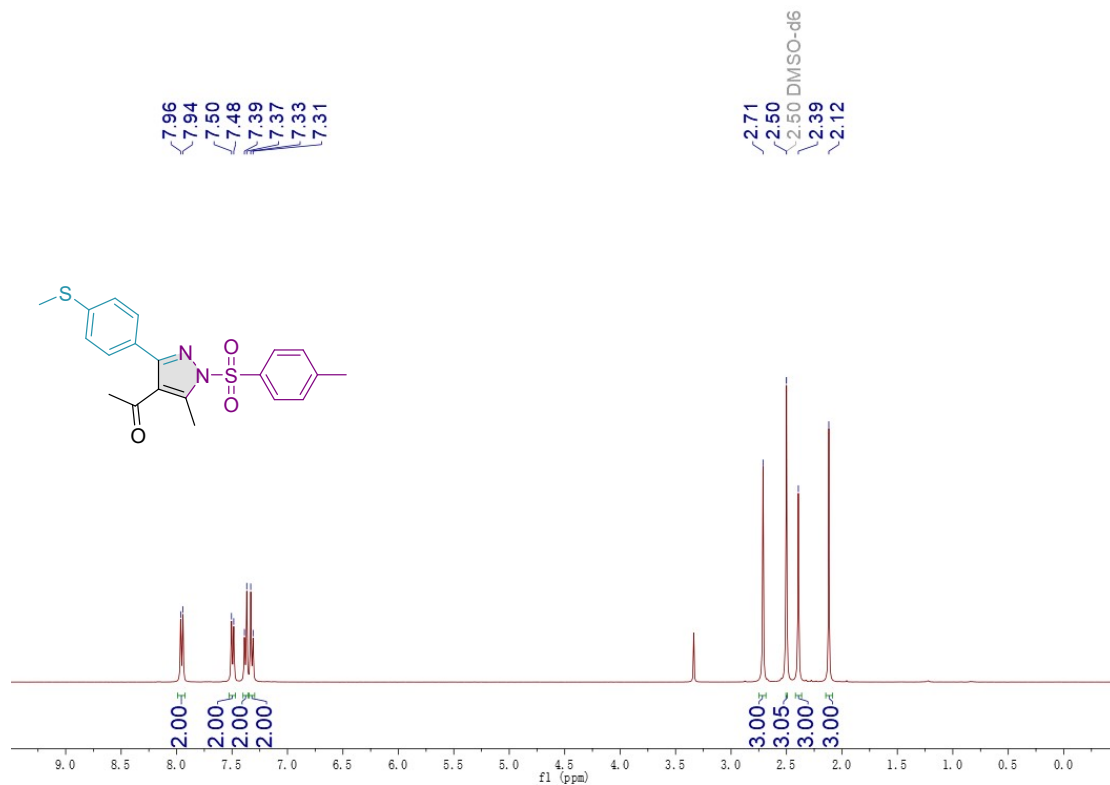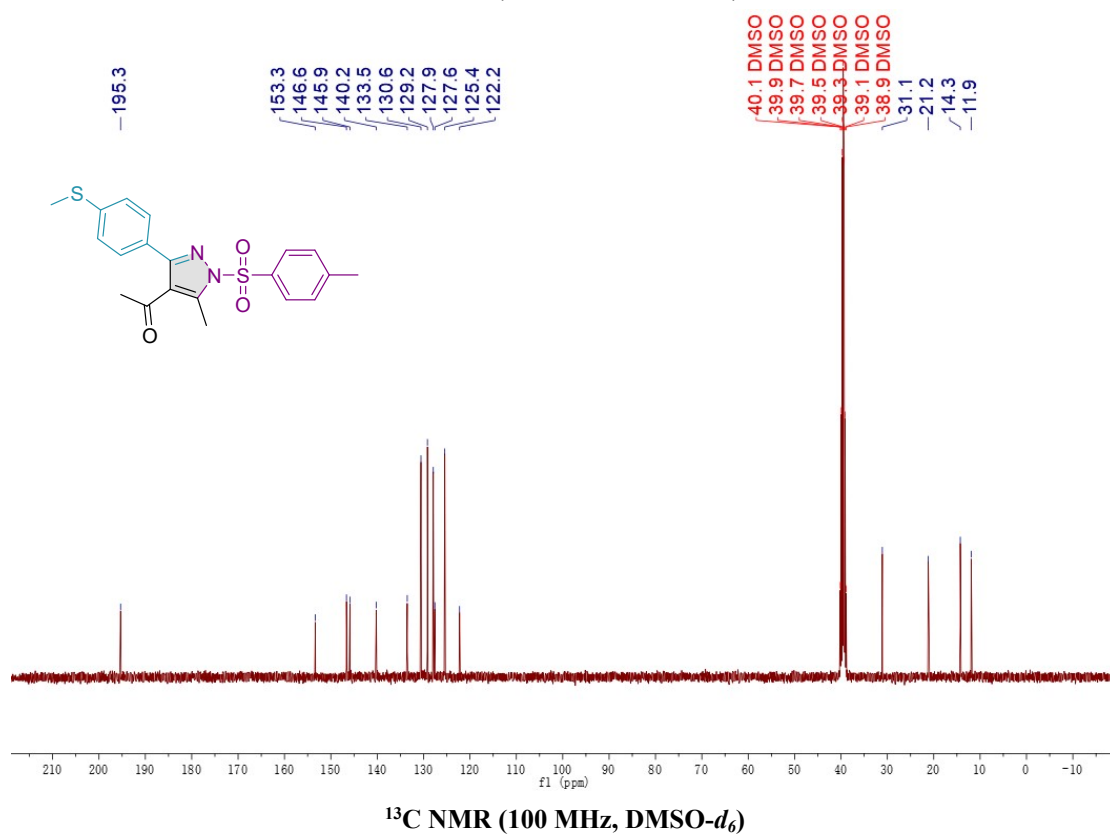

**1-(3-(4-(tert-butyl)phenyl)-5-methyl-1-tosyl-1H-pyrazol-4-yl)ethan-1-one (4v)**



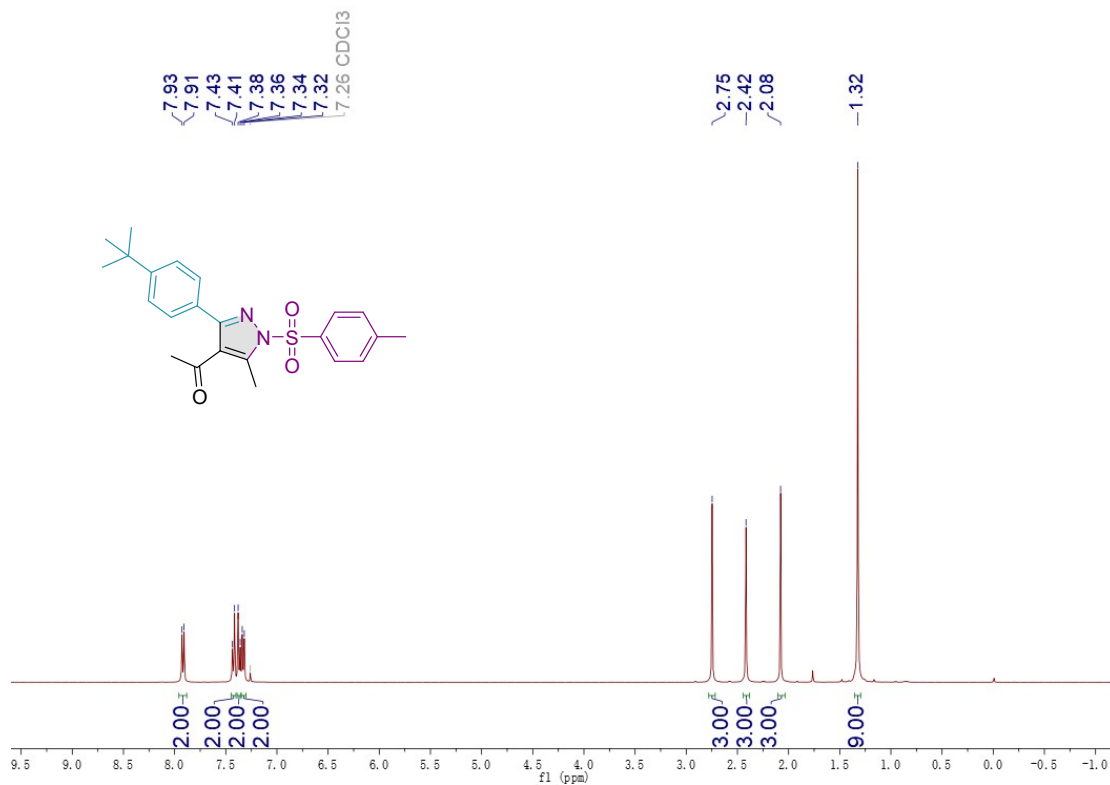

<sup>1</sup>H NMR (400 MHz, CDCl<sub>3</sub>)

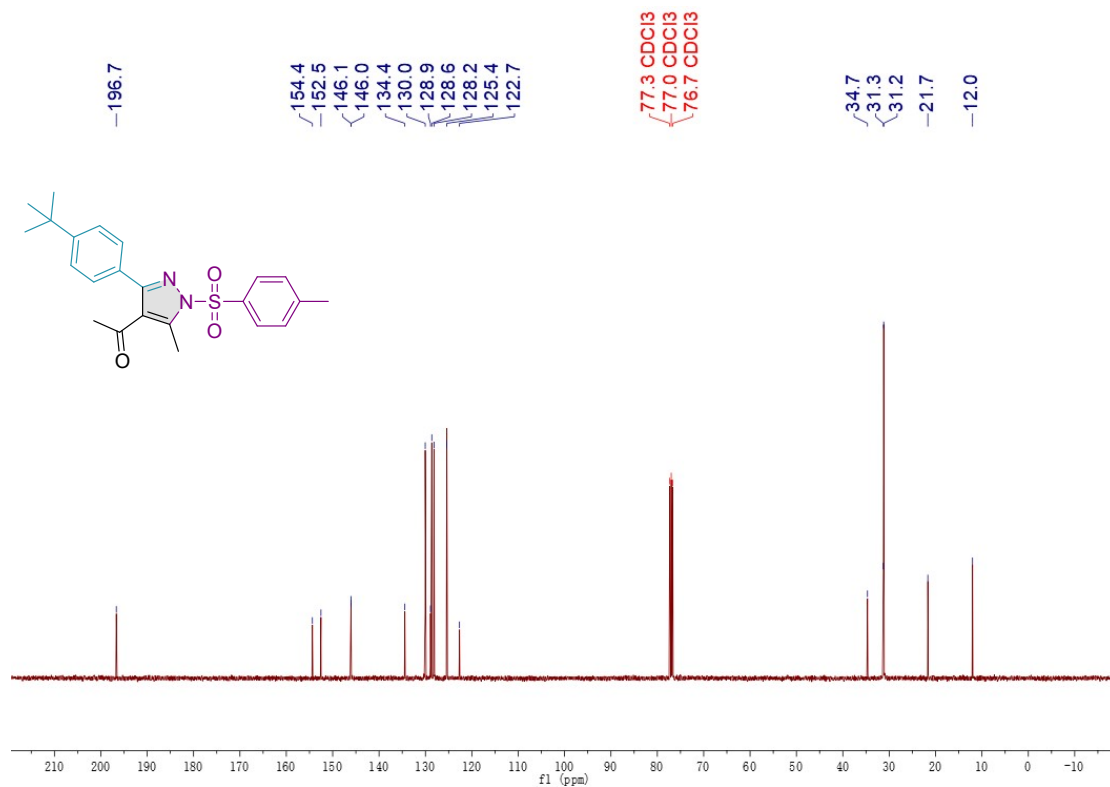

<sup>13</sup>C NMR (100 MHz, CDCl<sub>3</sub>)

1-(3-([1,1'-biphenyl]-4-yl)-5-methyl-1H-pyrazol-4-yl)ethan-1-one (4w)

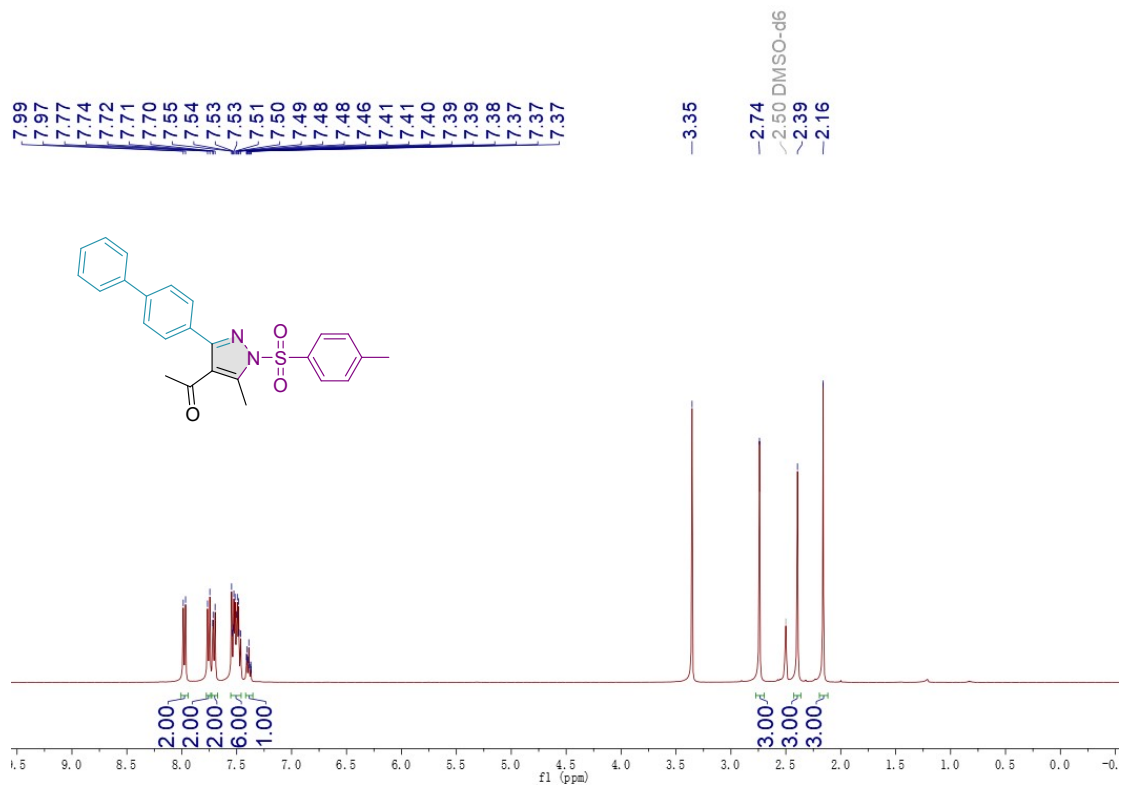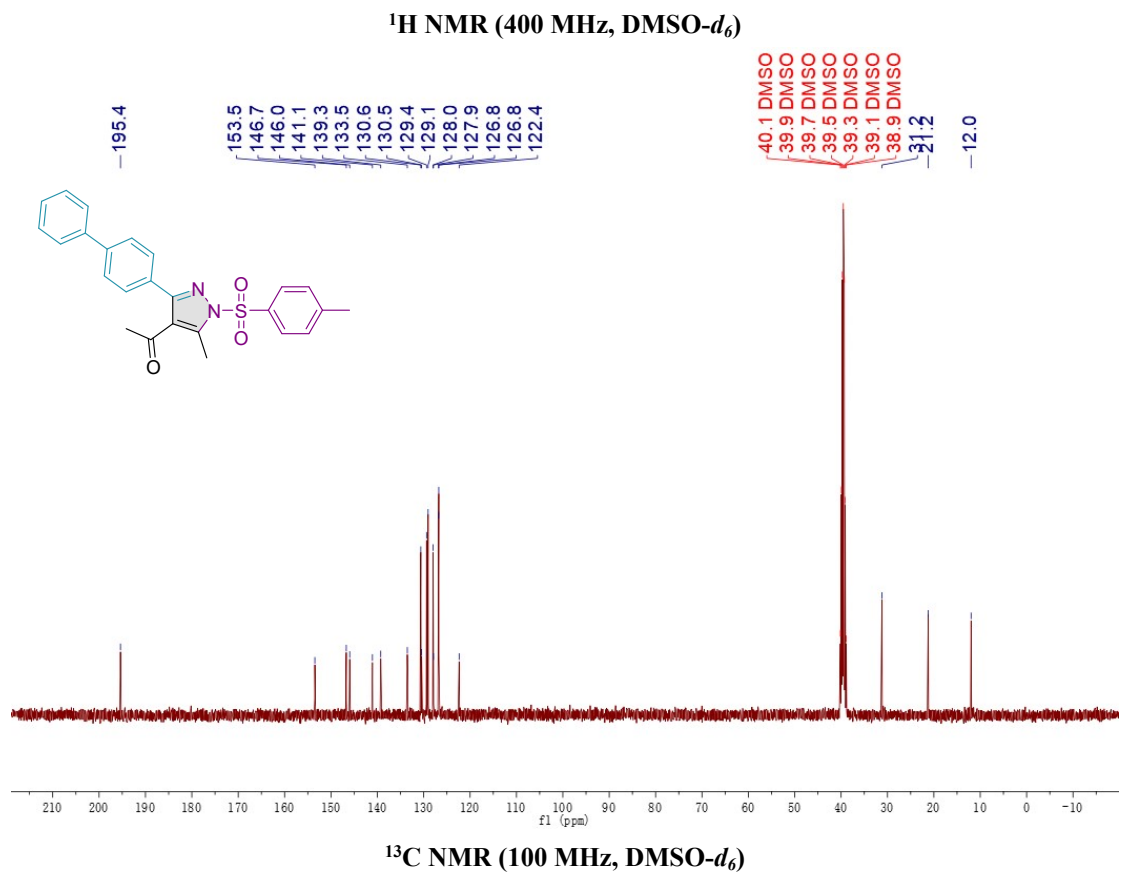

**1-(5-methyl-3-(4-phenoxyphenyl)-1-tosyl-1H-pyrazol-4-yl)ethan-1-one (4x)**

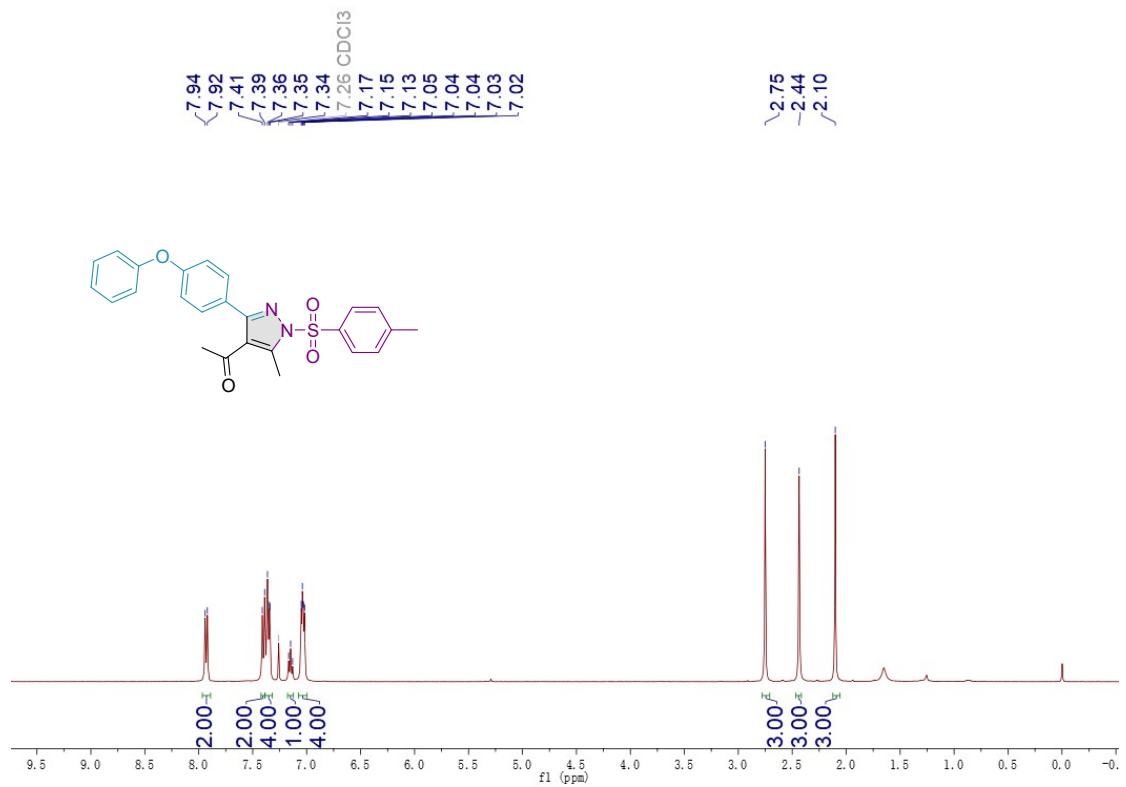

<sup>1</sup>H NMR (400 MHz, CDCl<sub>3</sub>)

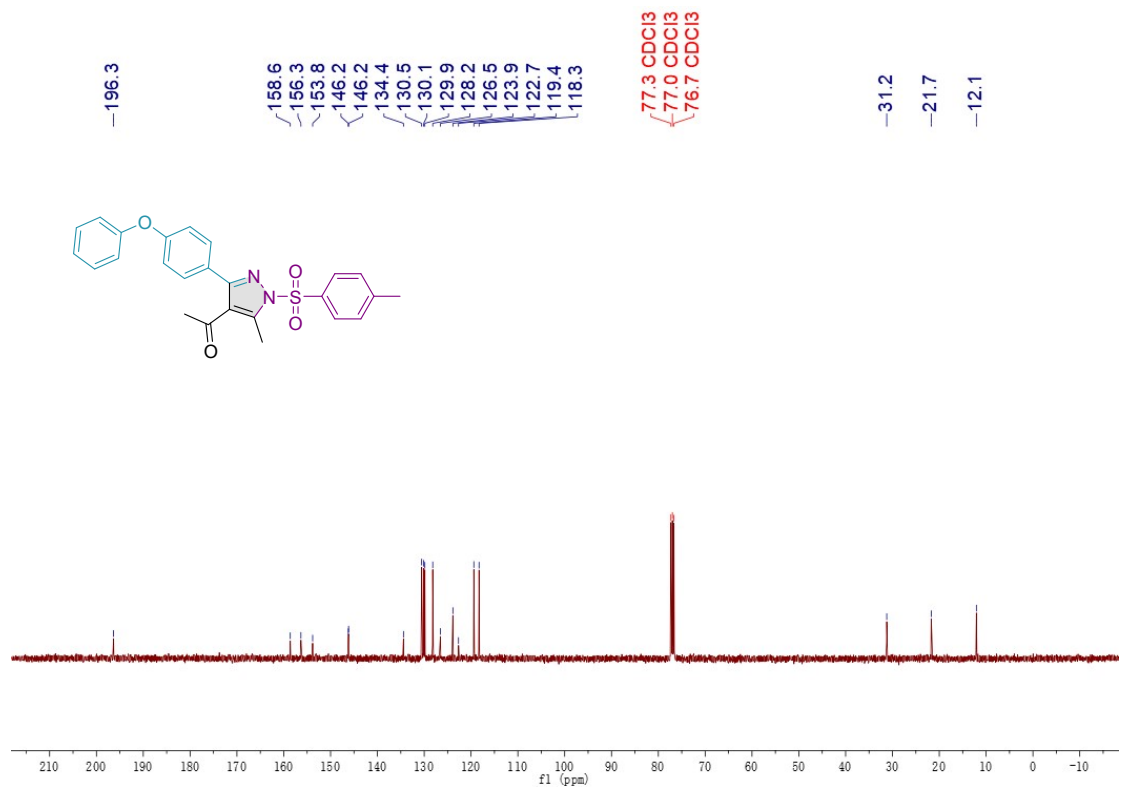

<sup>13</sup>C NMR (100 MHz, CDCl<sub>3</sub>)

1-(5-methyl-1-tosyl-3-(4-(trifluoromethyl)phenyl)-1H-pyrazol-4-yl)ethan-1-one (4y)

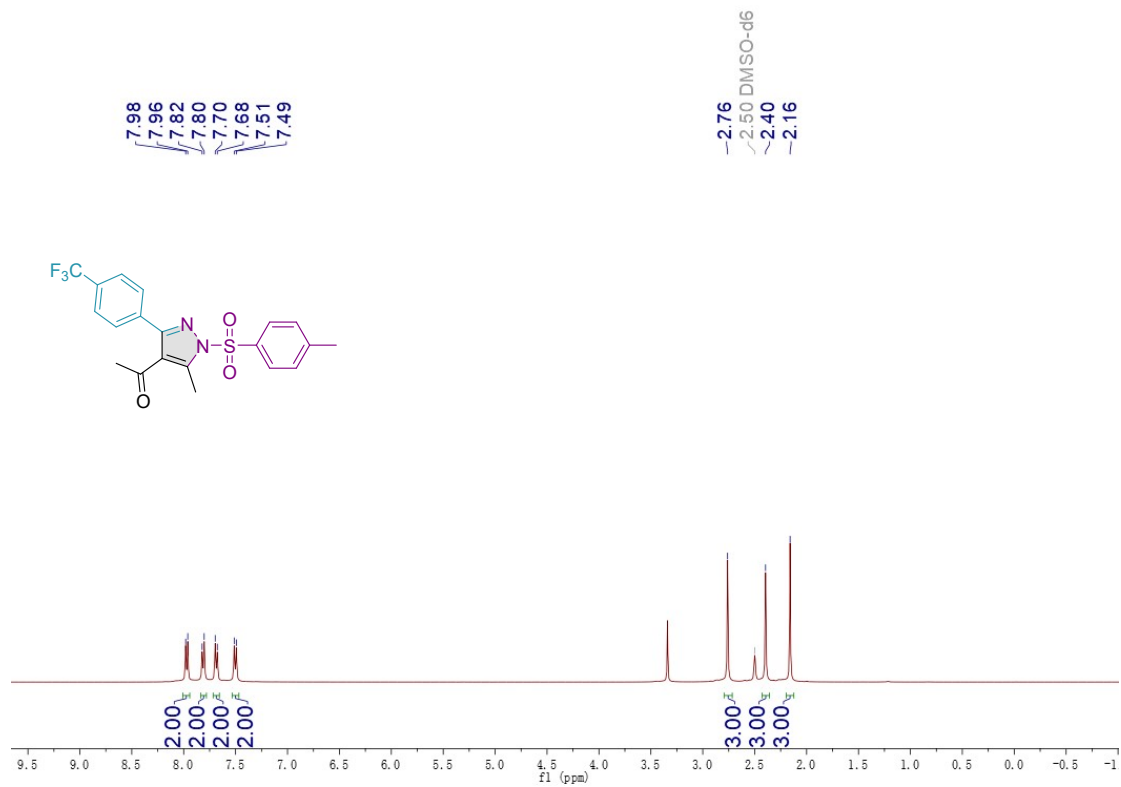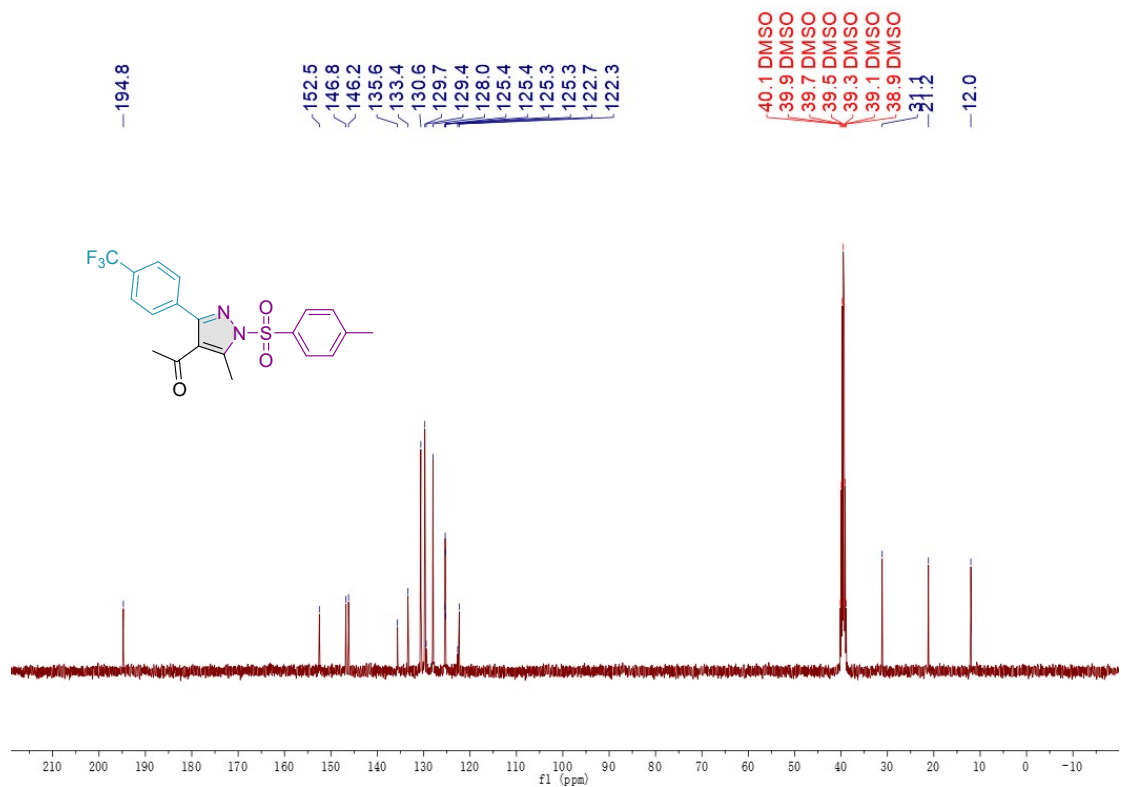

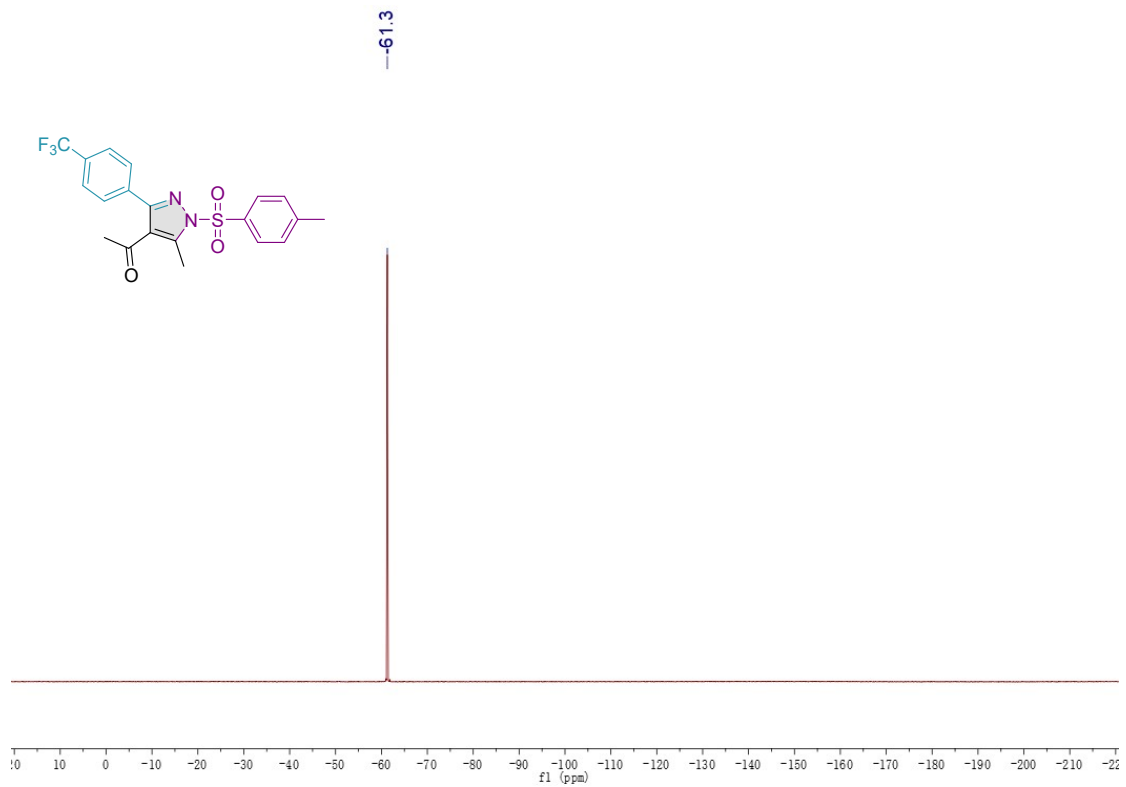

$^{19}\text{F}$  NMR (376 MHz,  $\text{DMSO-}d_6$ )

1-(5-methyl-3-(4-(methylsulfonyl)phenyl)-1H-pyrazol-4-yl)ethan-1-one (4z)

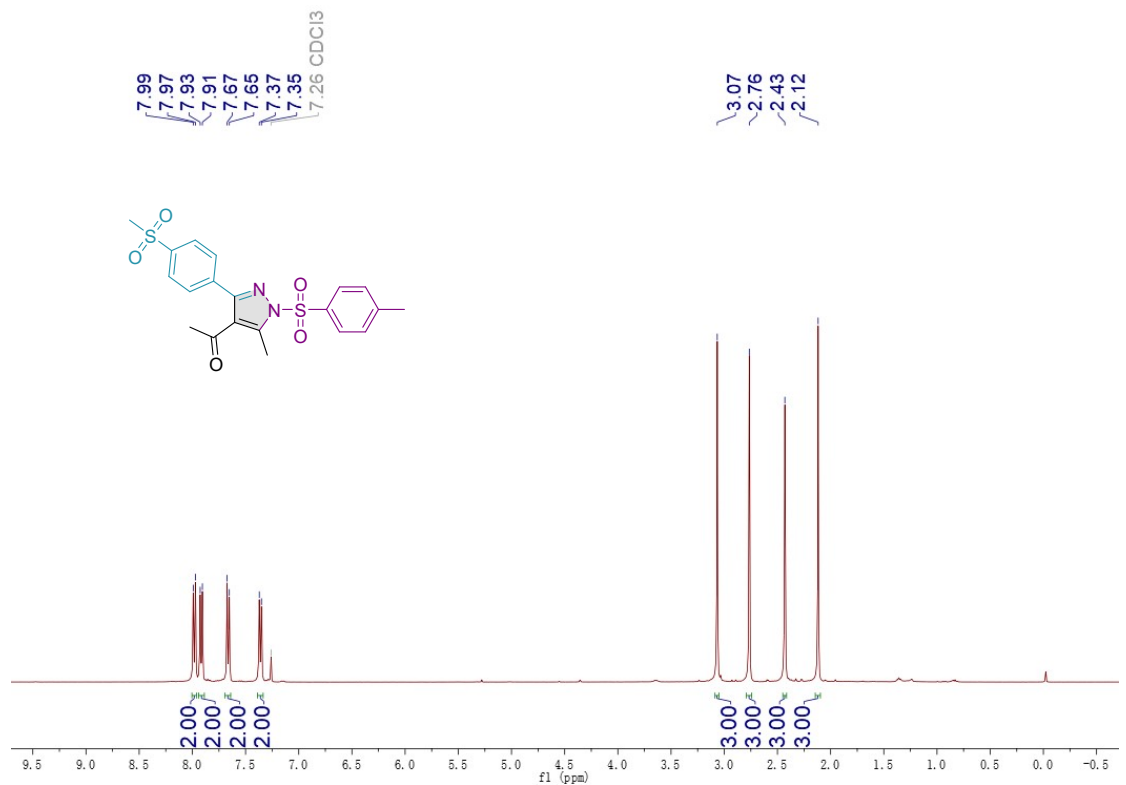

$^1\text{H}$  NMR (400 MHz,  $\text{CDCl}_3$ )

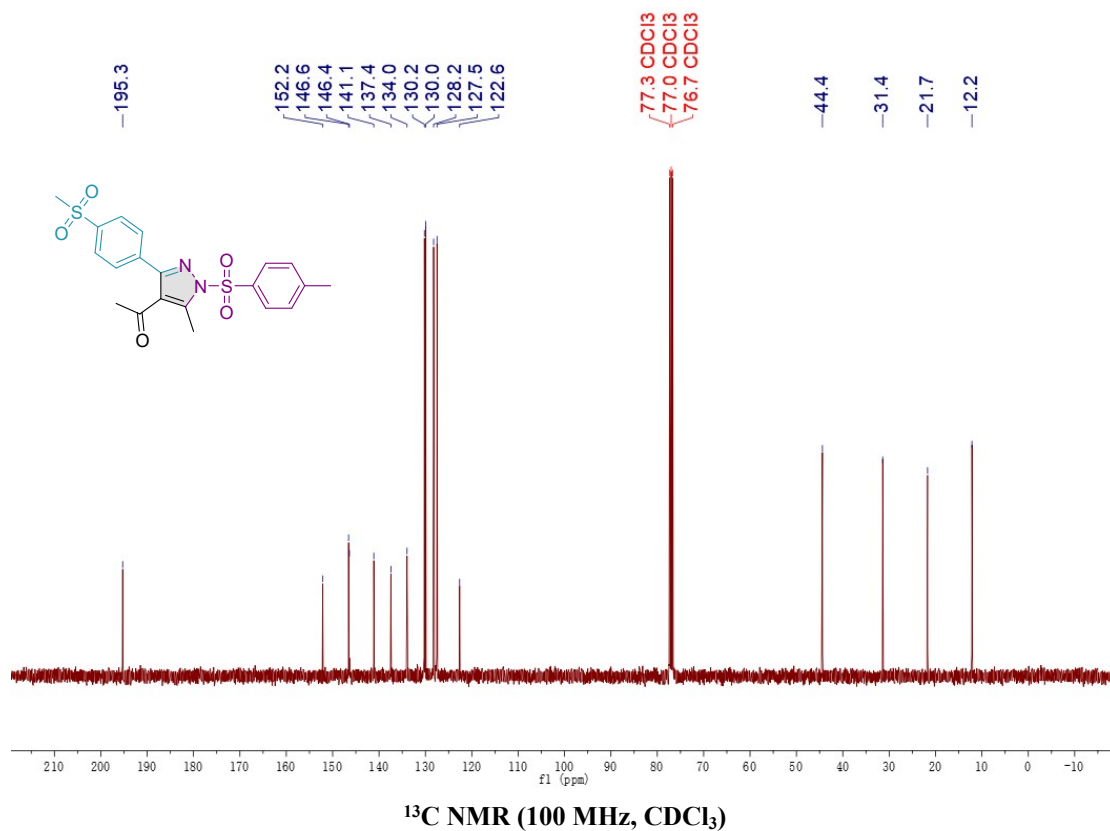

**1-(3-(4-(2-hydroxyethoxy)phenyl)-5-methyl-1-tosyl-1H-pyrazol-4-yl)ethan-1-one (4aa)**

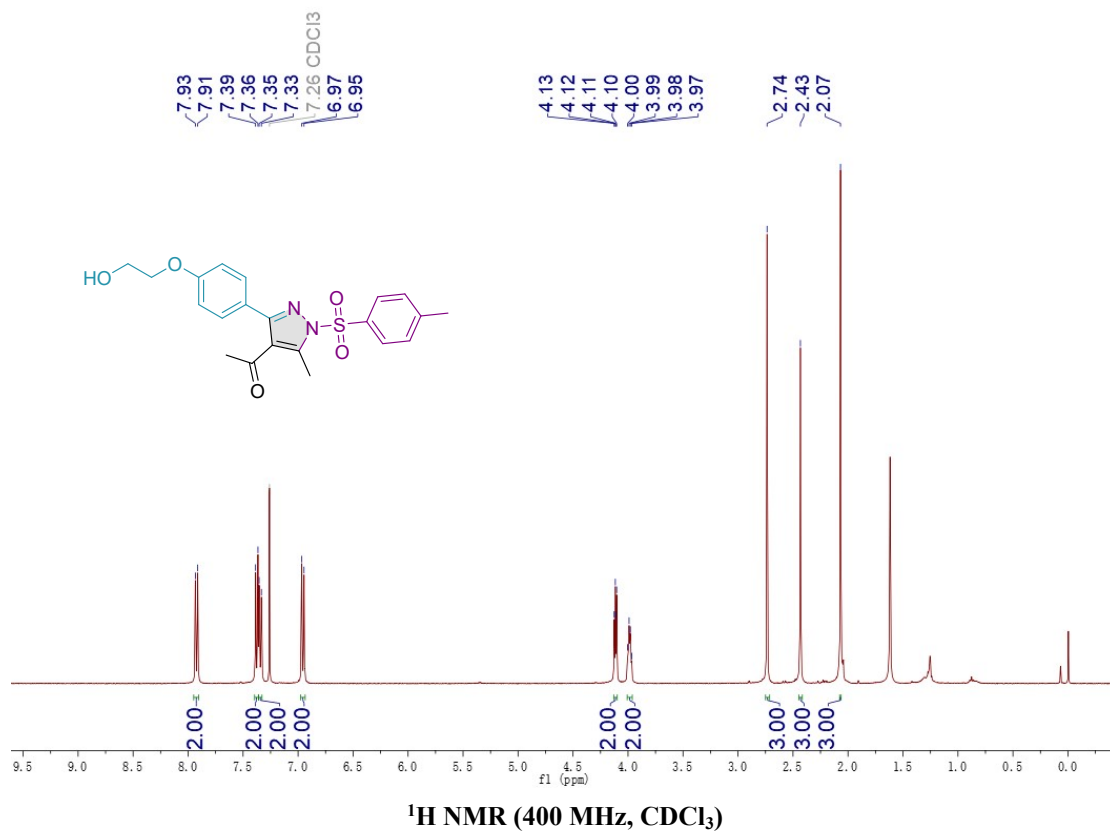

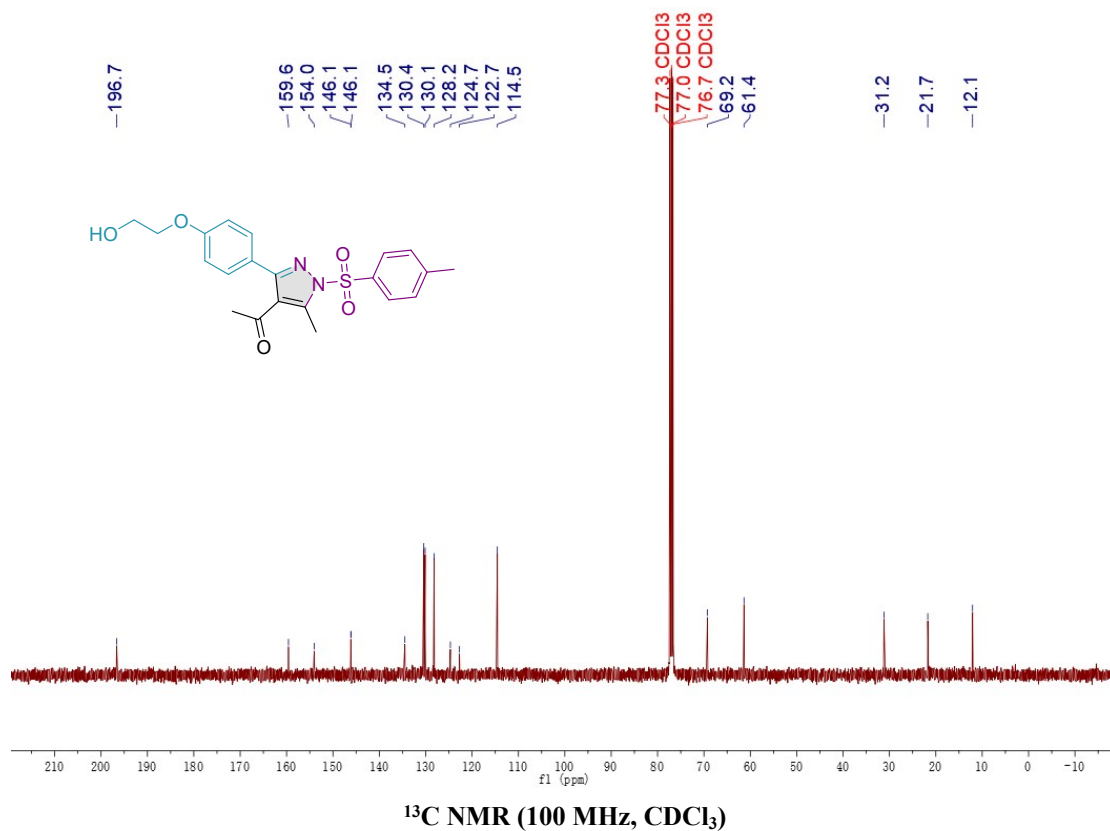

**1-(3-(4-cyclopropylphenyl)-5-methyl-1H-pyrazol-4-yl)ethan-1-one (4ab)**

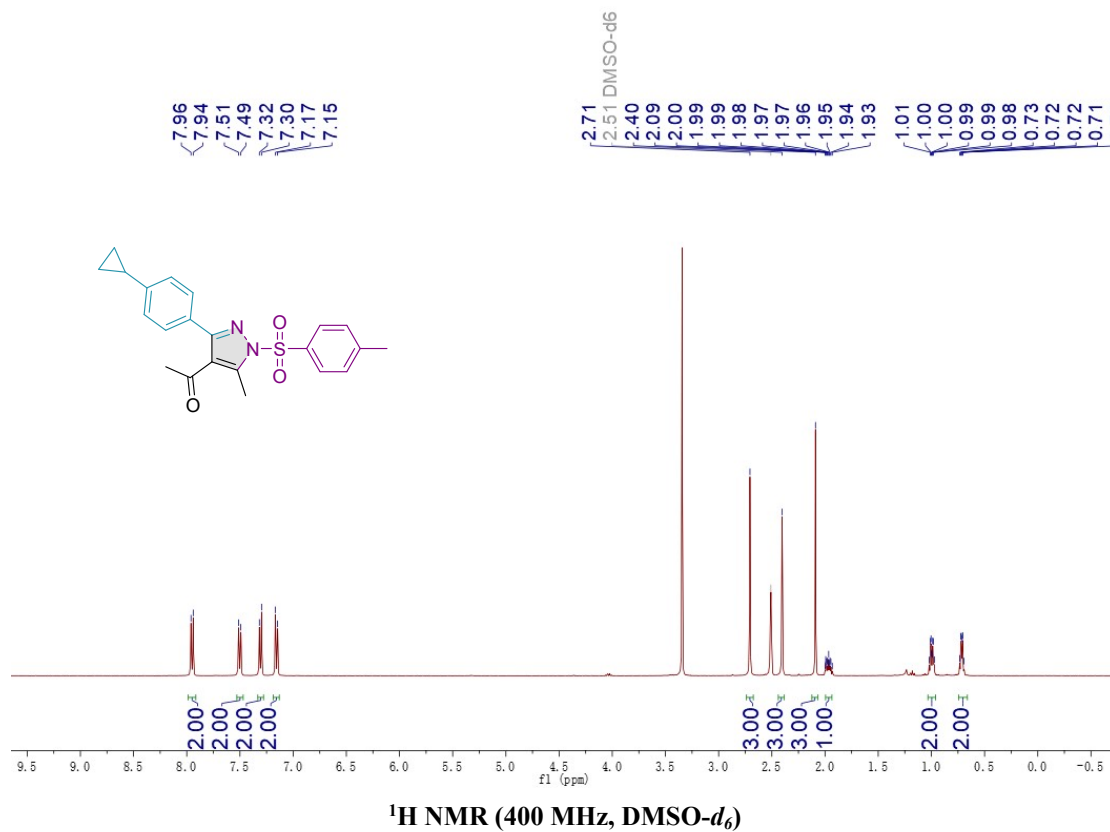

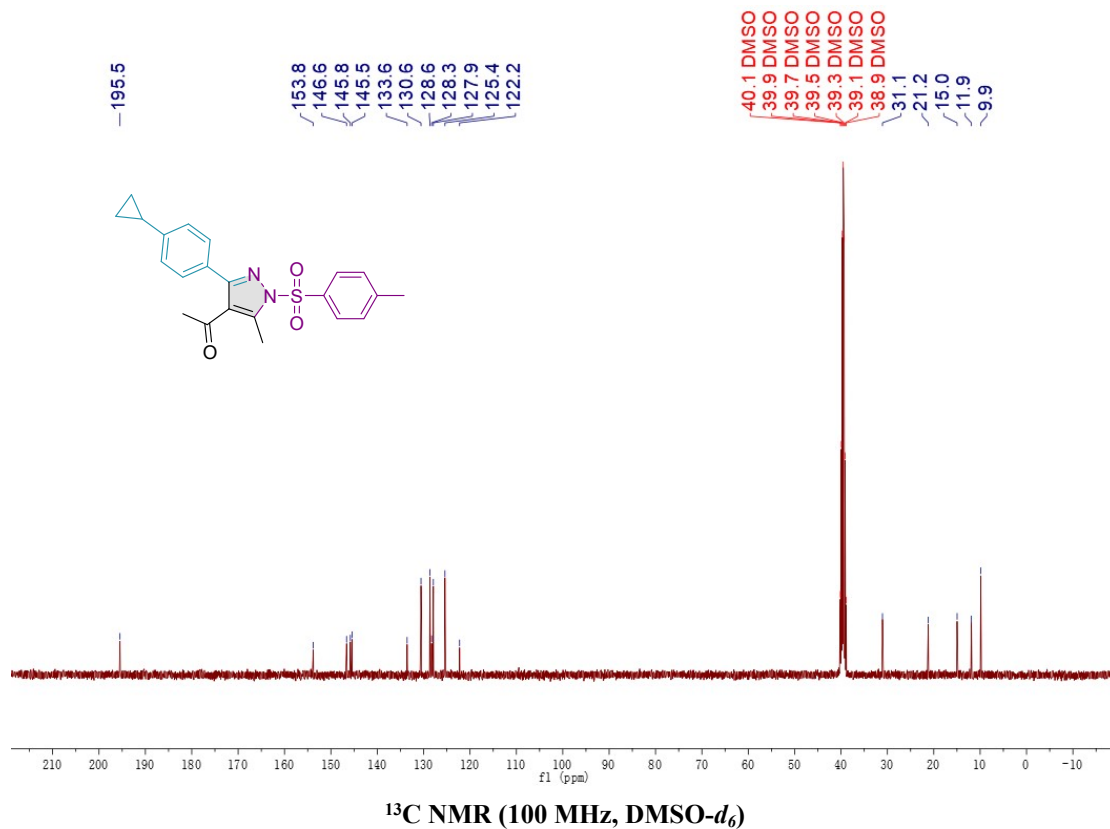

**1-(3-(2-fluorophenyl)-5-methyl-1H-pyrazol-4-yl)ethan-1-one (4ac)**

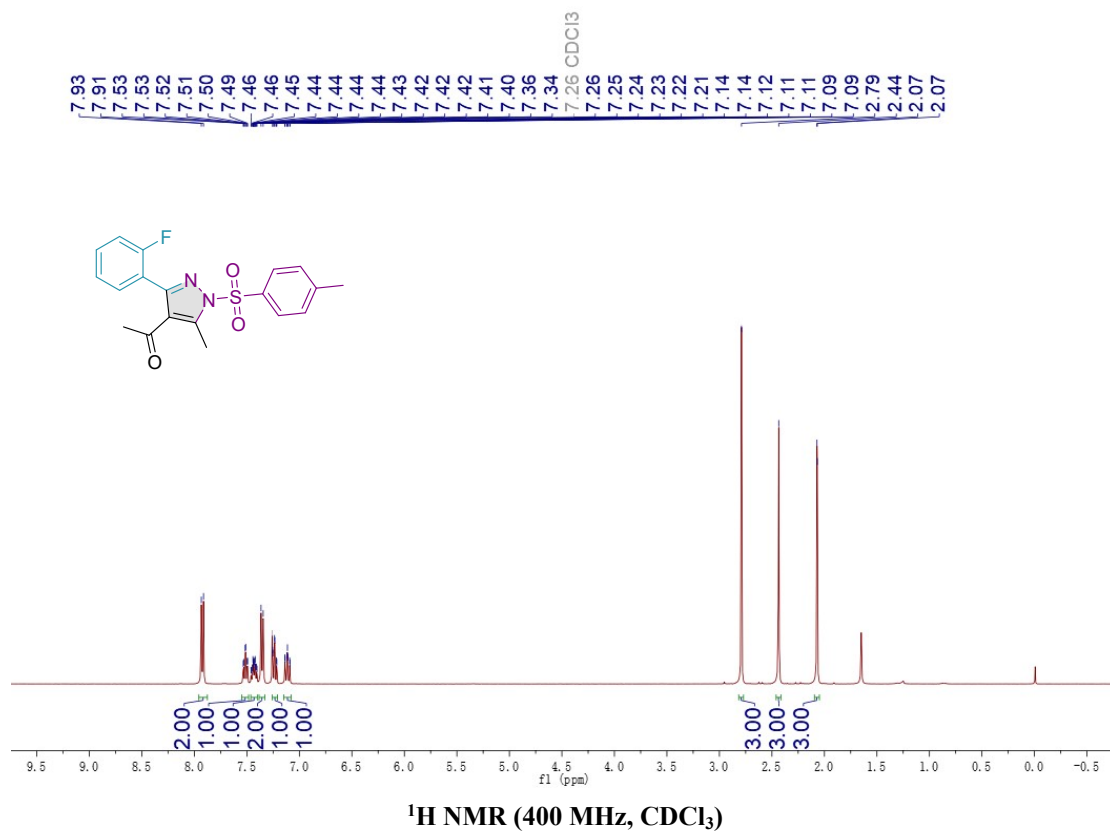



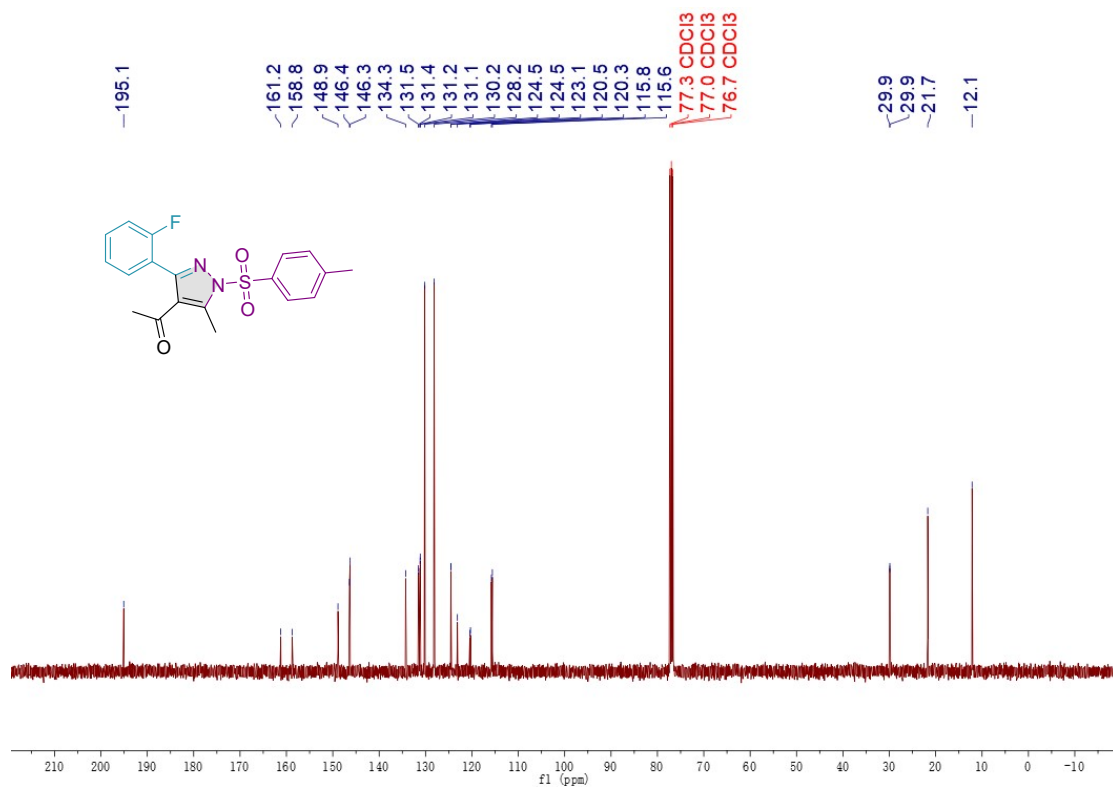

<sup>13</sup>C NMR (100 MHz, CDCl<sub>3</sub>)

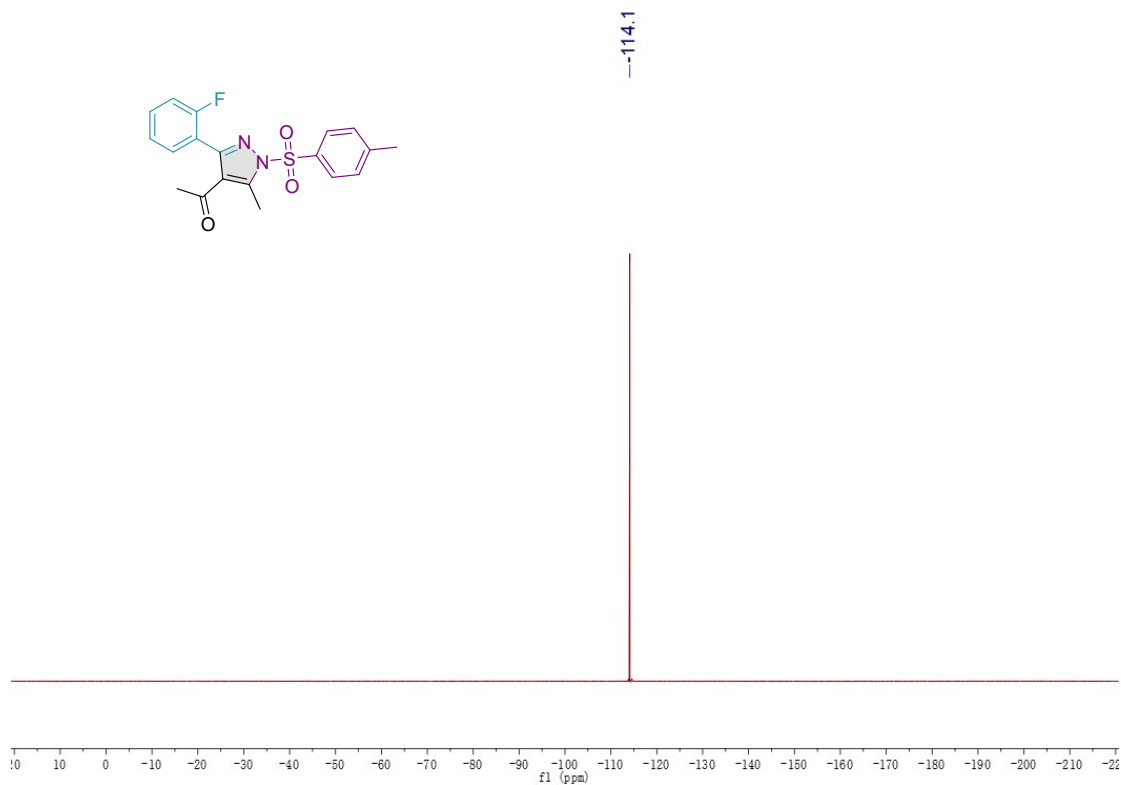

<sup>19</sup>F NMR (376 MHz, CDCl<sub>3</sub>)

1-(5-methyl-1-tosyl-3-(3-(trifluoromethyl)phenyl)-1H-pyrazol-4-yl)ethan-1-one (4ad)

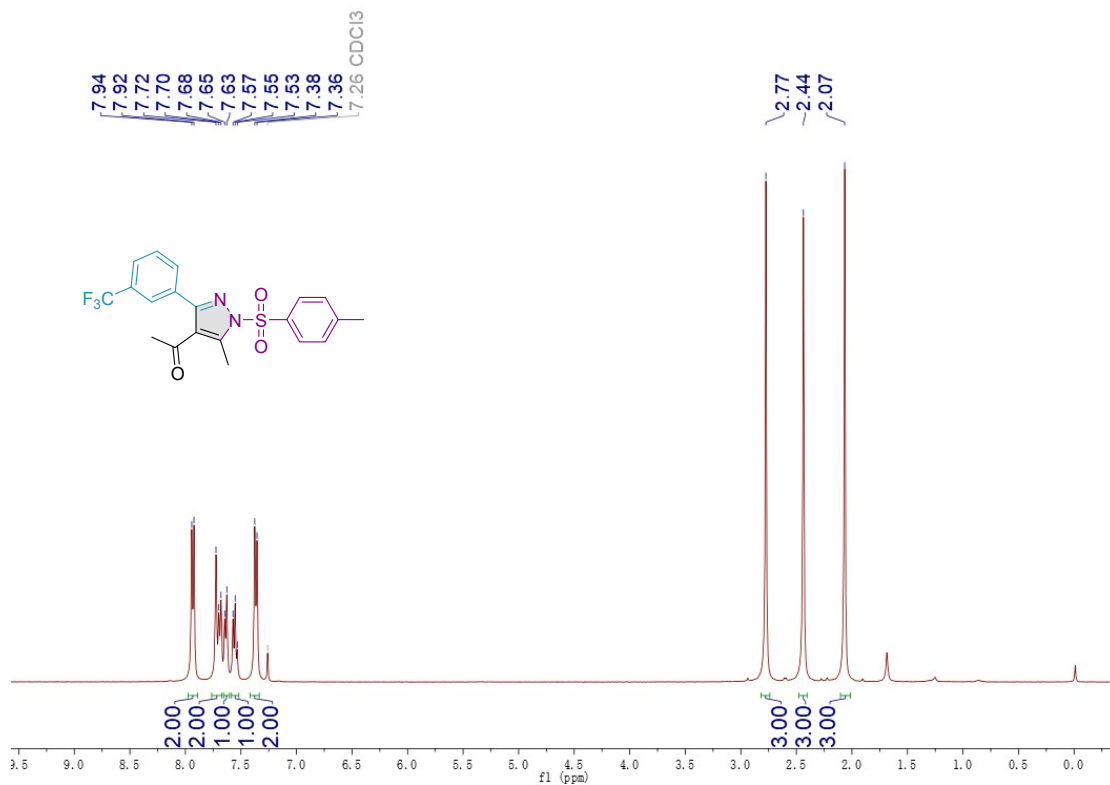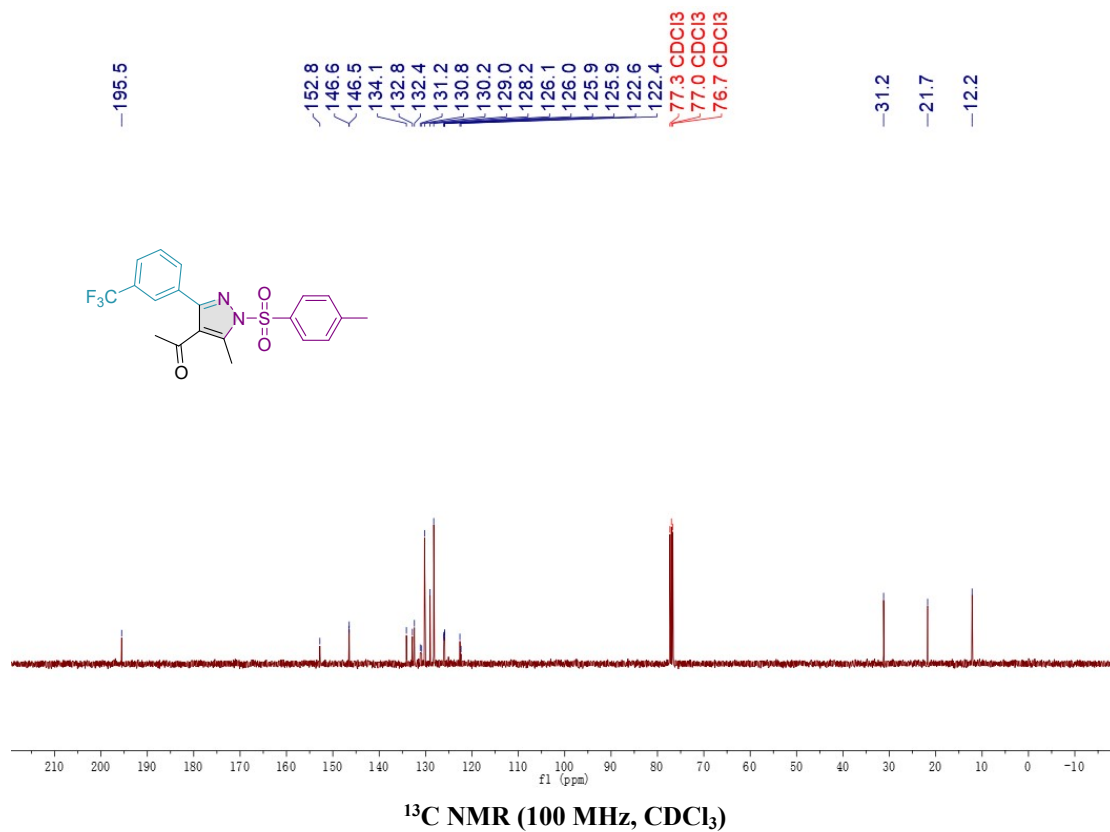

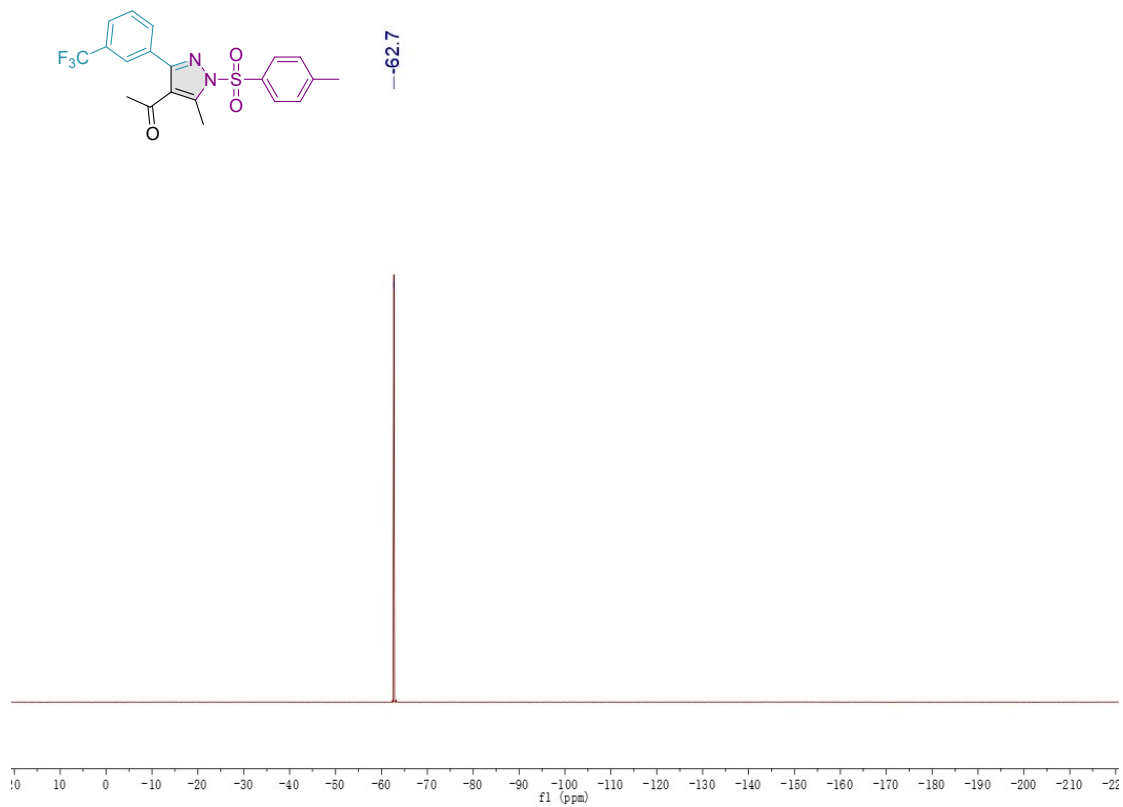

$^{19}\text{F}$  NMR (376 MHz,  $\text{CDCl}_3$ )

1-(3-(3-bromophenyl)-5-methyl-1-tosyl-1H-pyrazol-4-yl)ethan-1-one (4ae)

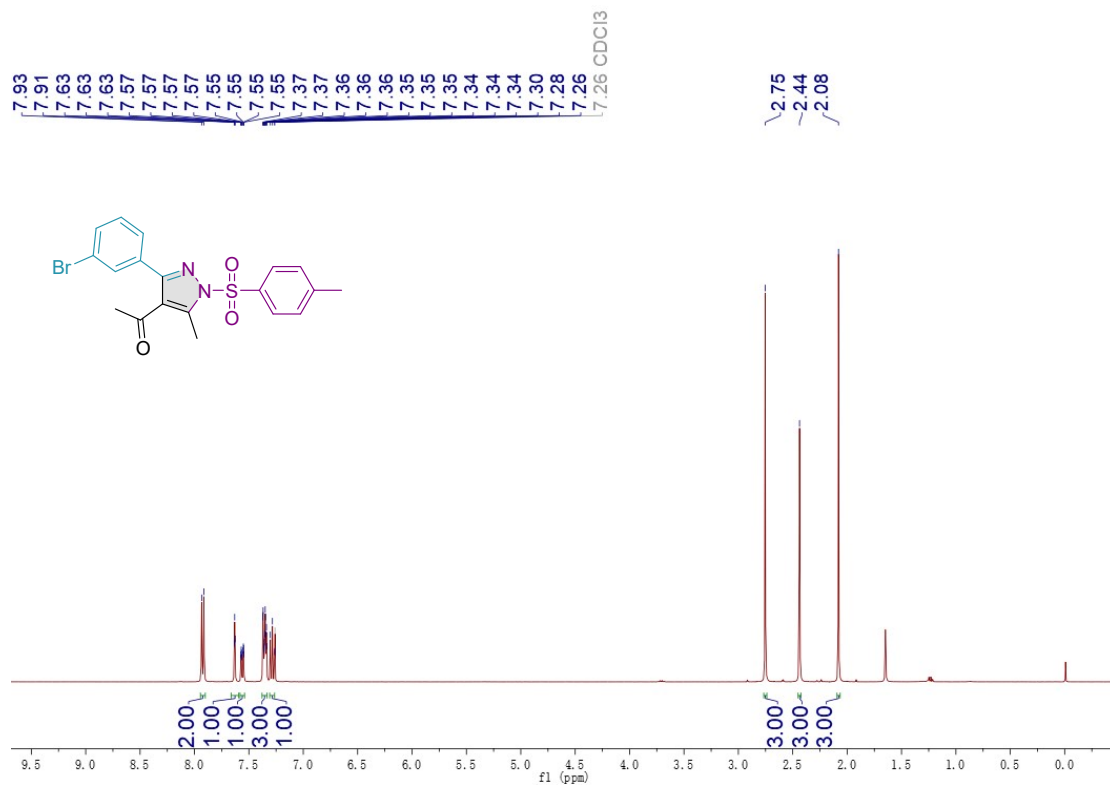

$^1\text{H}$  NMR (400 MHz,  $\text{CDCl}_3$ )

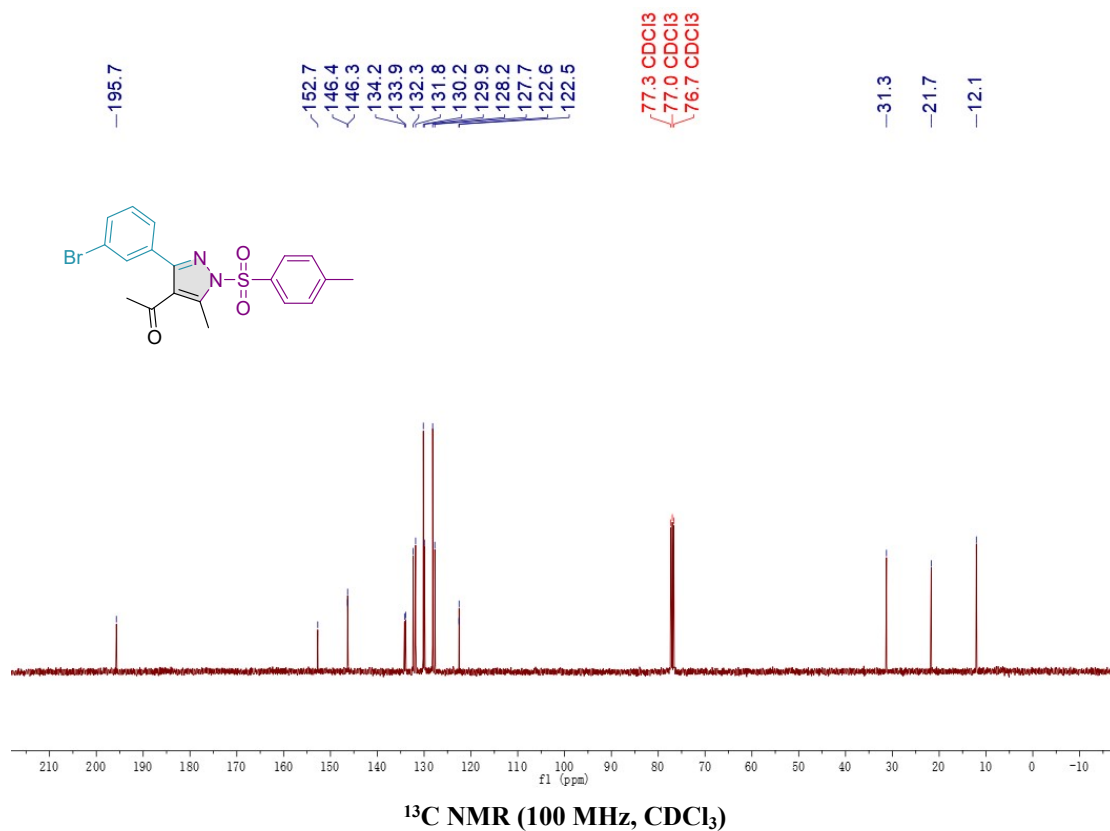

1-(3-(3-methoxyphenyl)-5-methyl-1H-pyrazol-4-yl)ethan-1-one (4af)

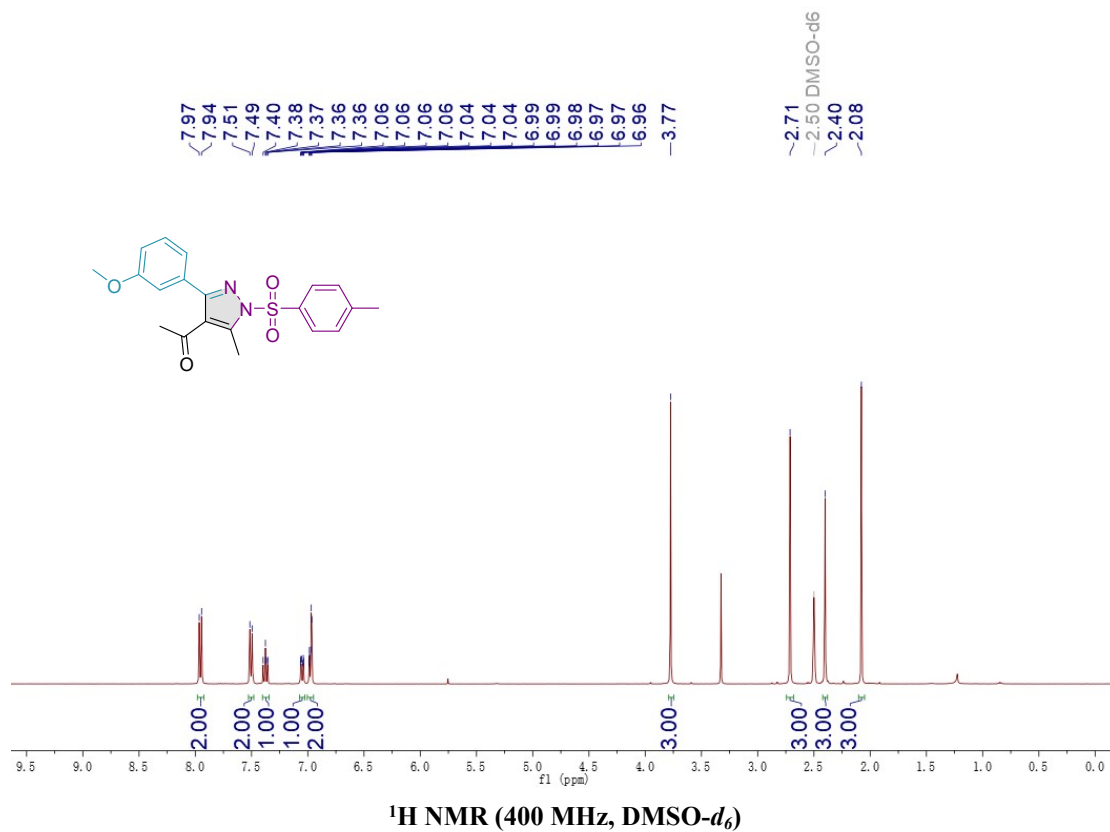

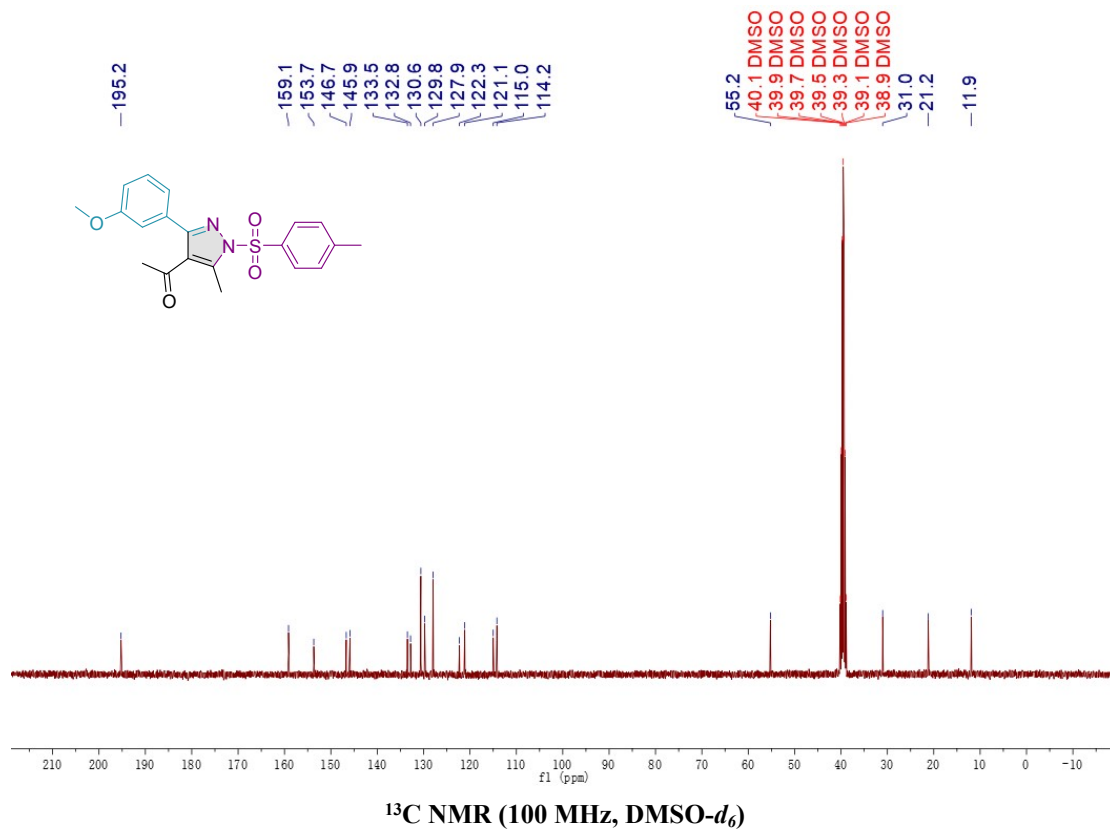

**1-(3-(3-hydroxyphenyl)-5-methyl-1H-pyrazol-4-yl)ethan-1-one (4ag)**

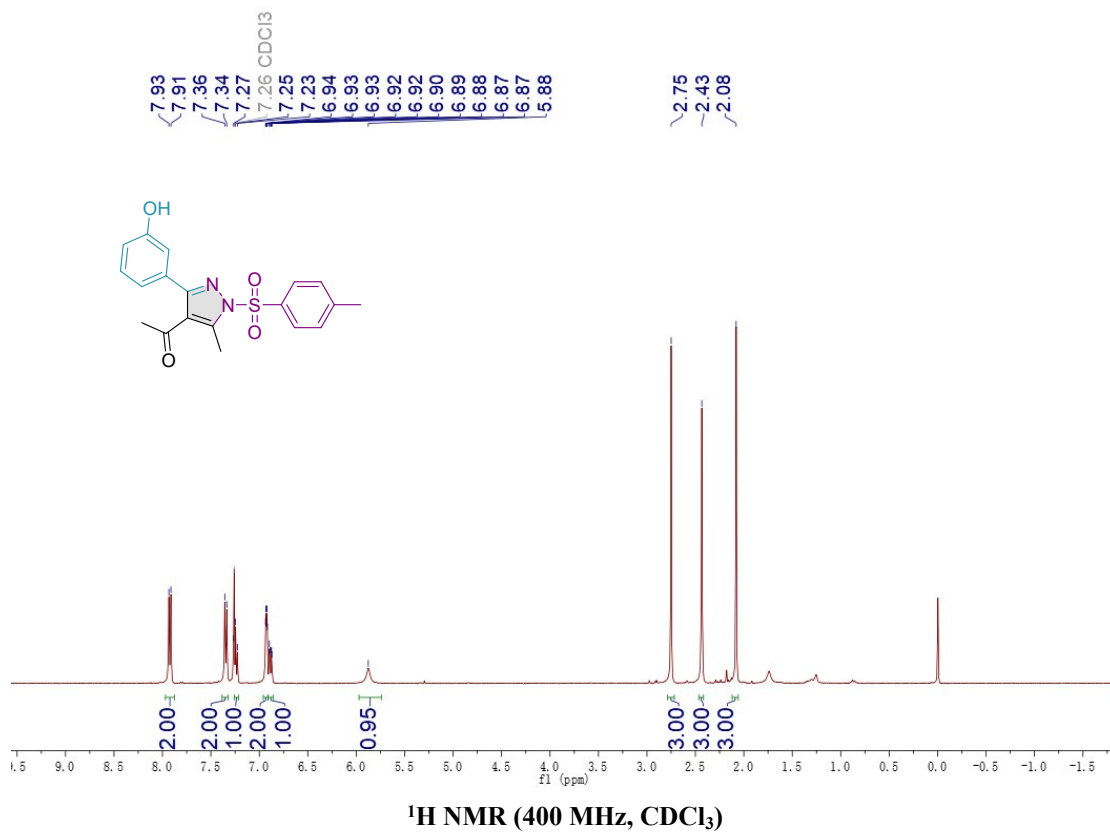

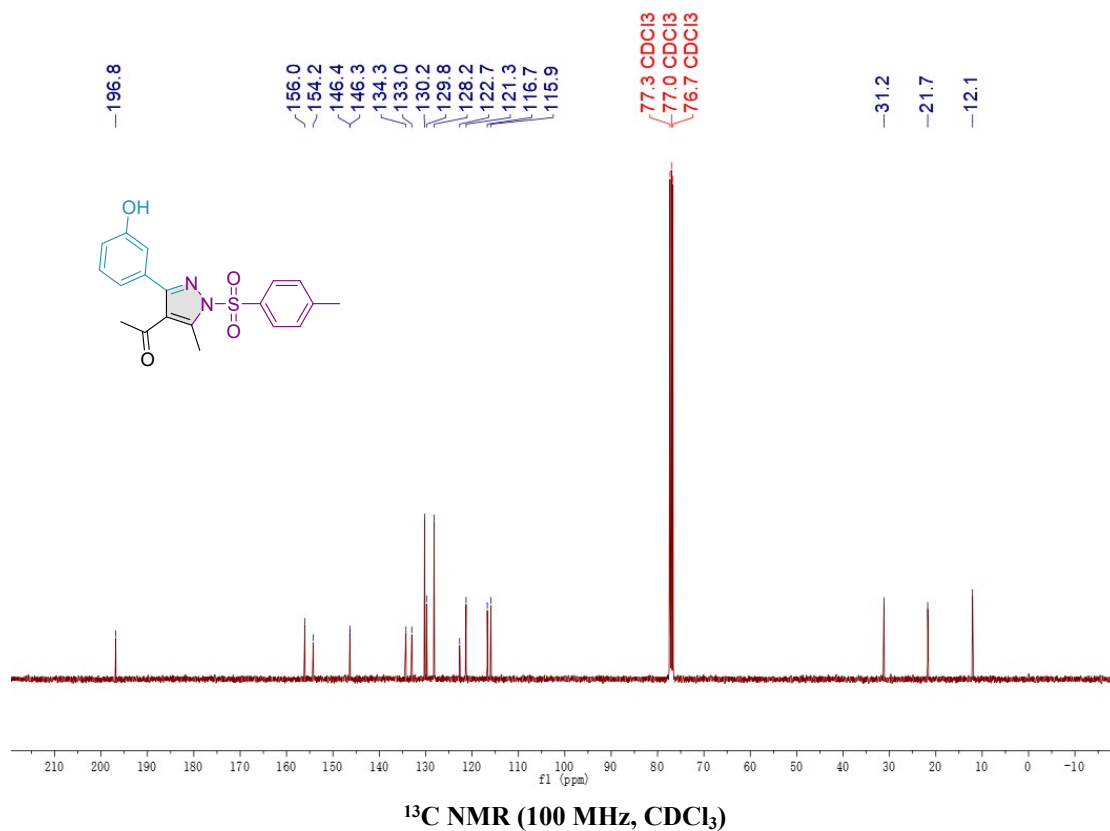

**1-(3-(3,5-dibromophenyl)-5-methyl-1H-pyrazol-4-yl)ethan-1-one (4ah)**

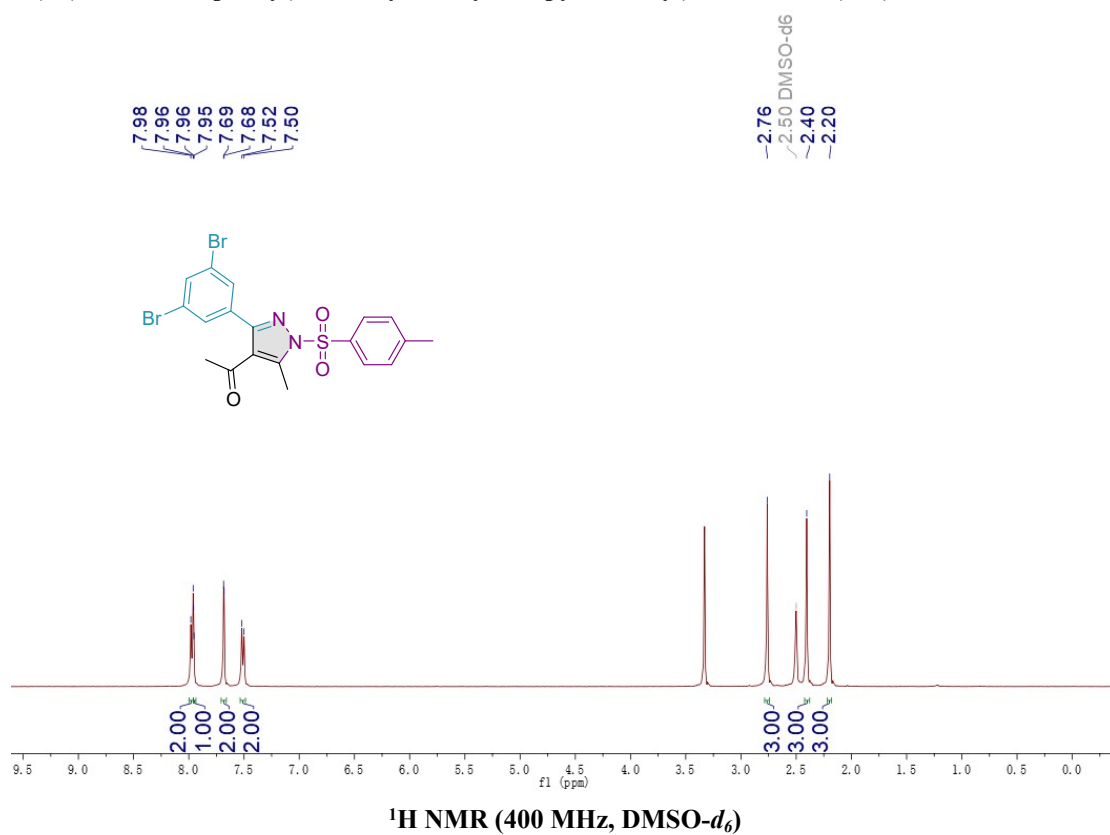

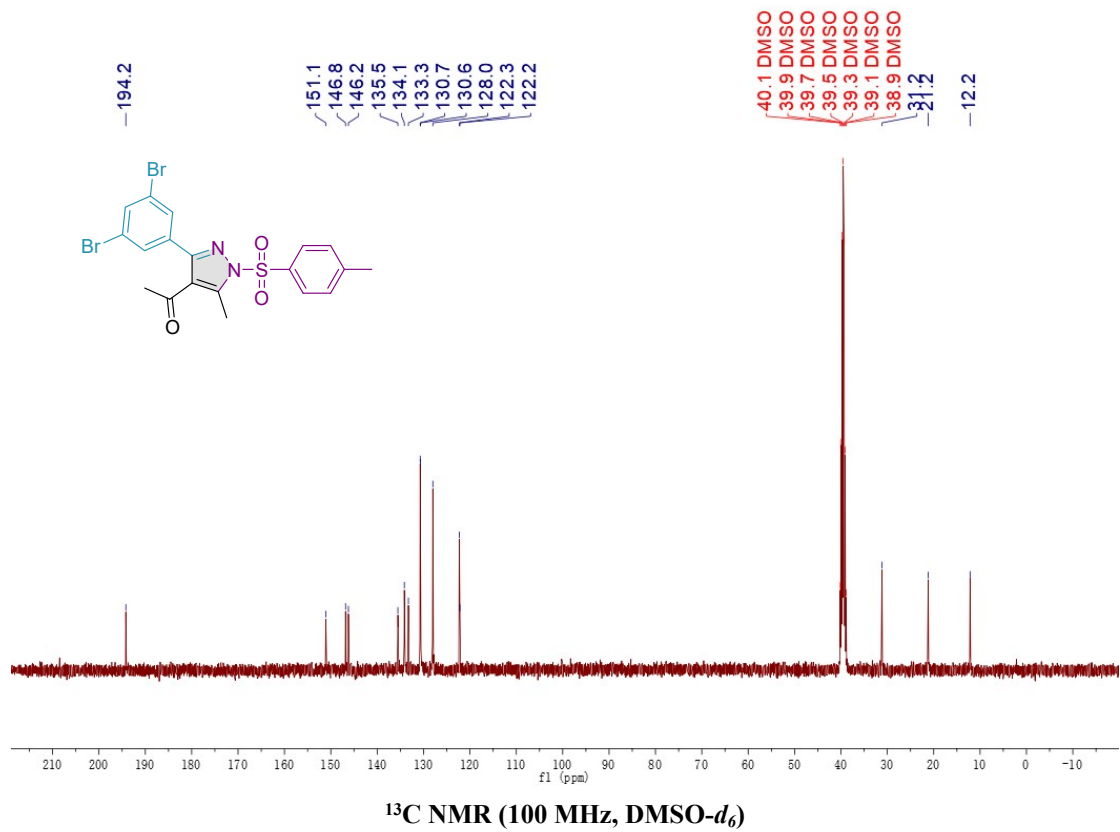

**1-(3-(3,5-dimethoxyphenyl)-5-methyl-1-tosyl-1H-pyrazol-4-yl)ethan-1-one (4ai)**

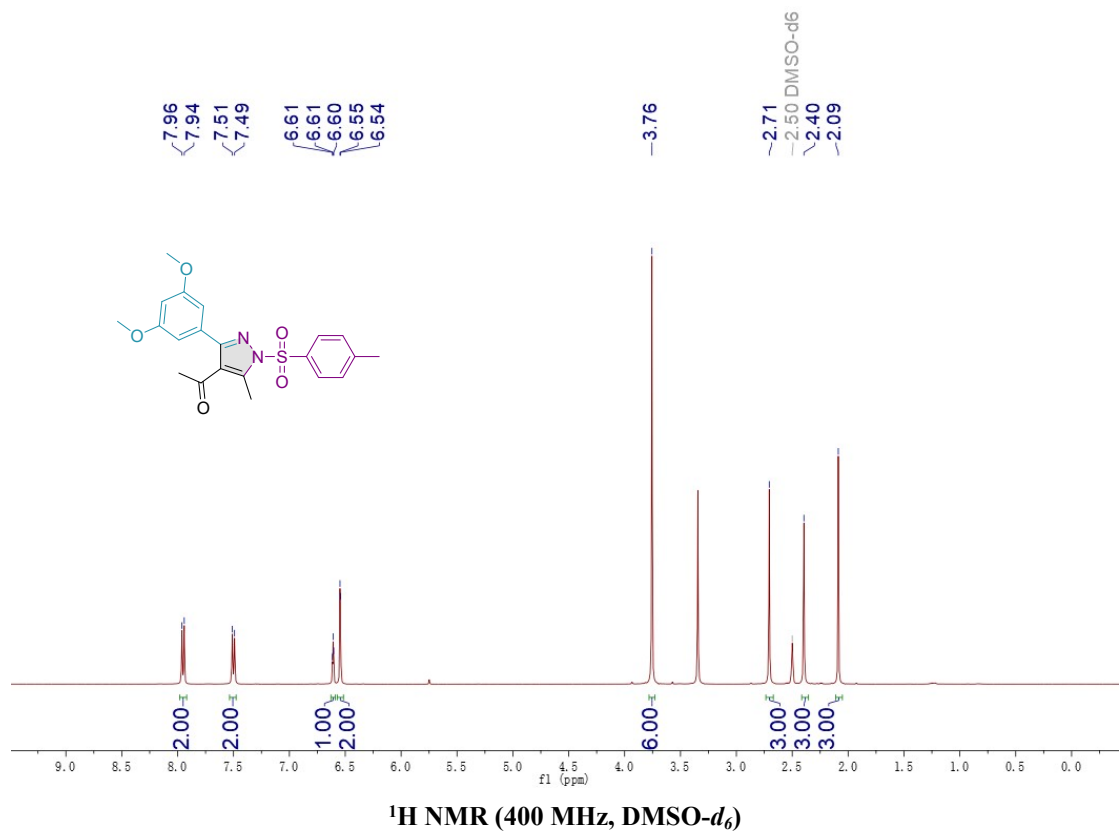

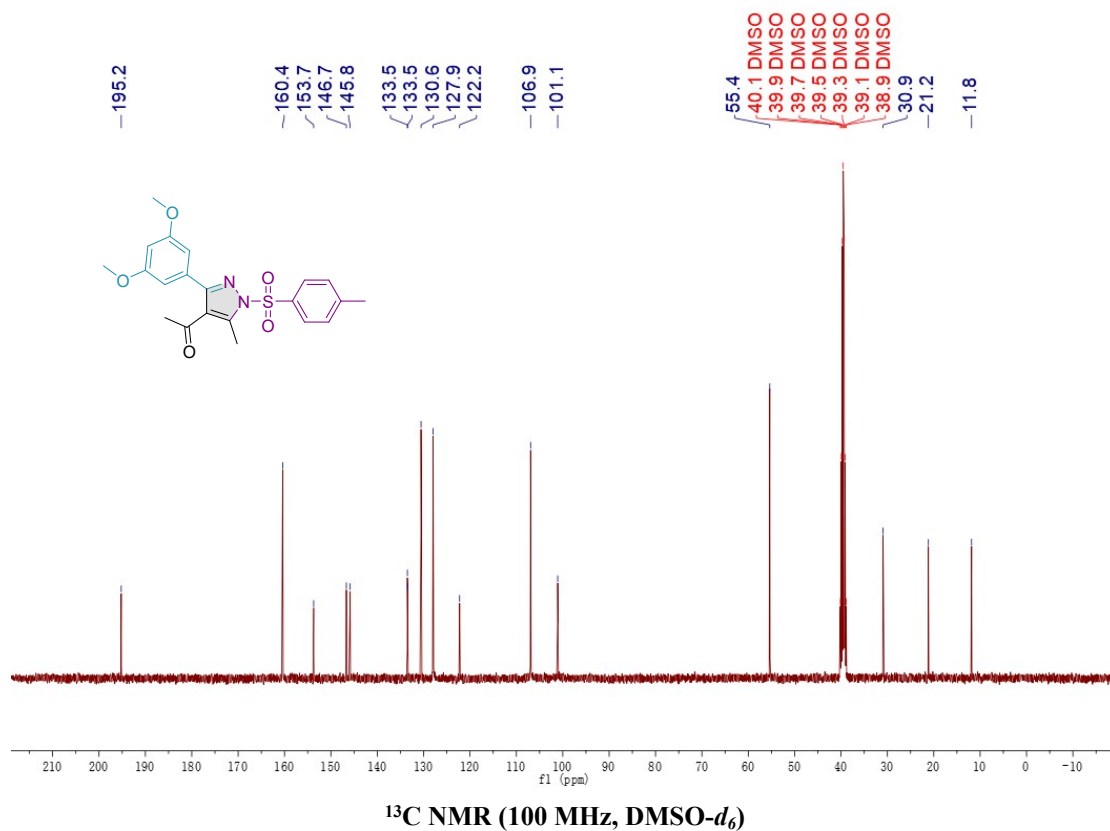

**1-(3-(3,4-difluorophenyl)-5-methyl-1H-pyrazol-4-yl)ethan-1-one (4aj)**

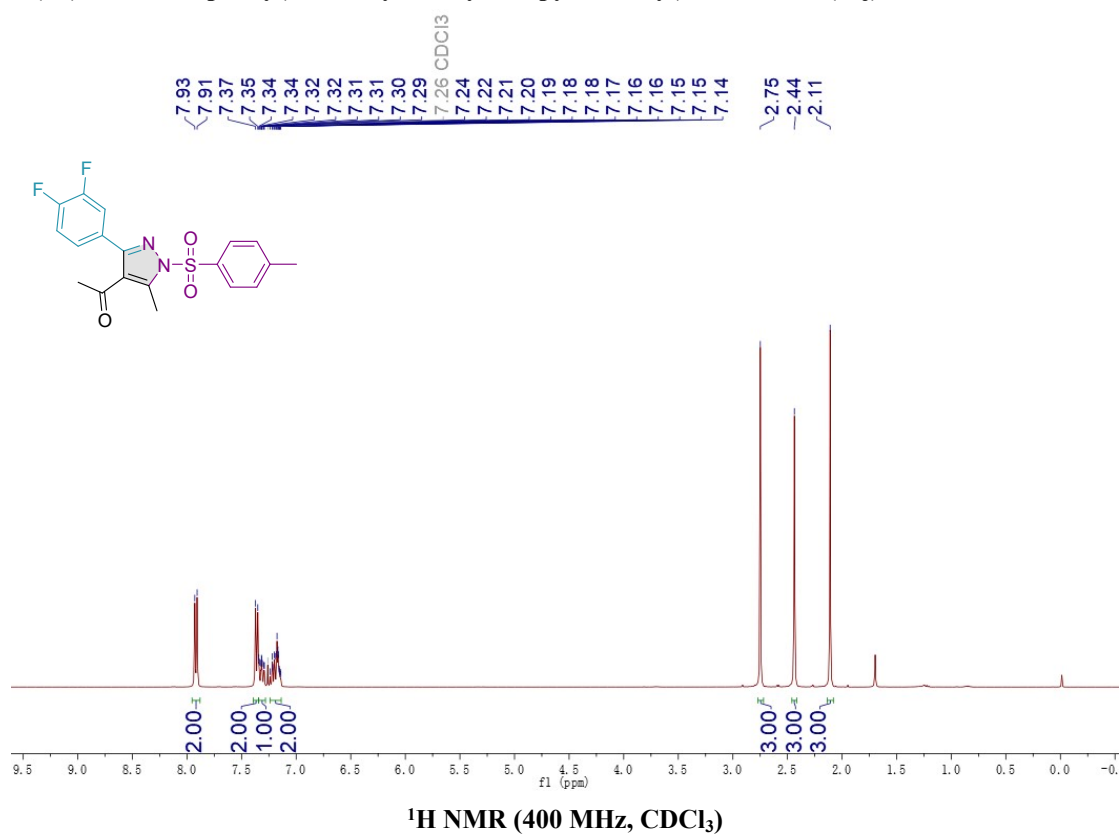



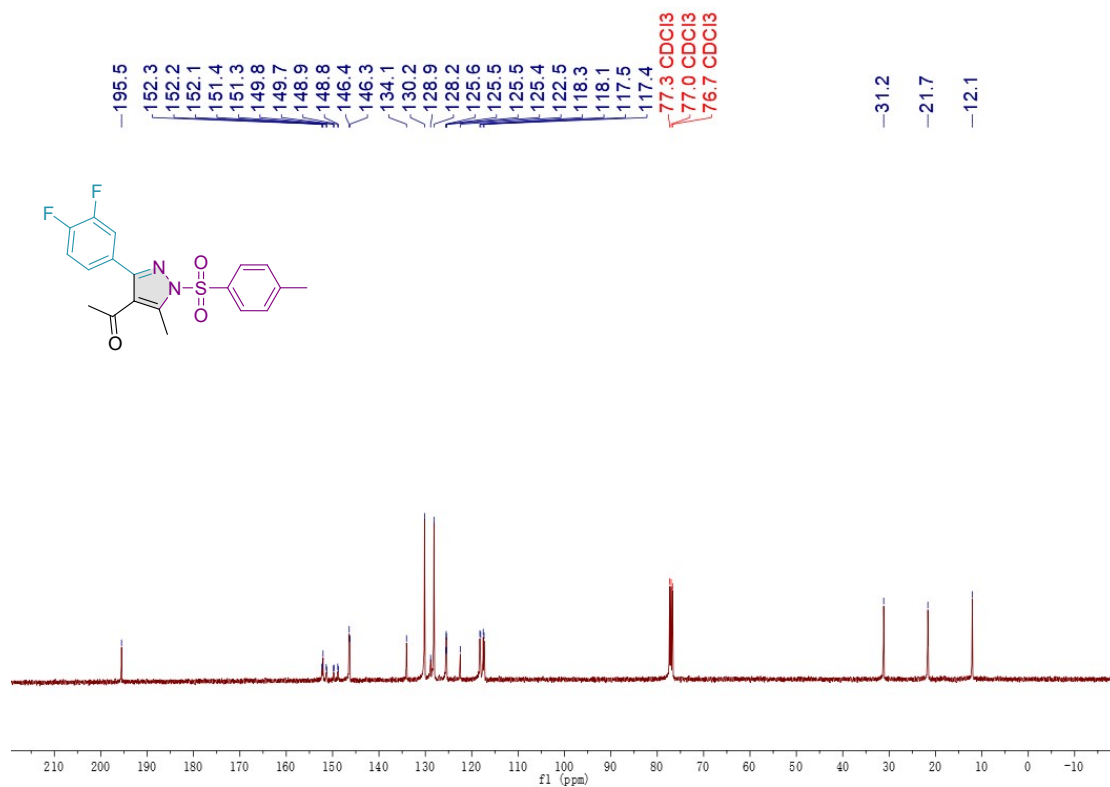

<sup>13</sup>C NMR (100 MHz, CDCl<sub>3</sub>)

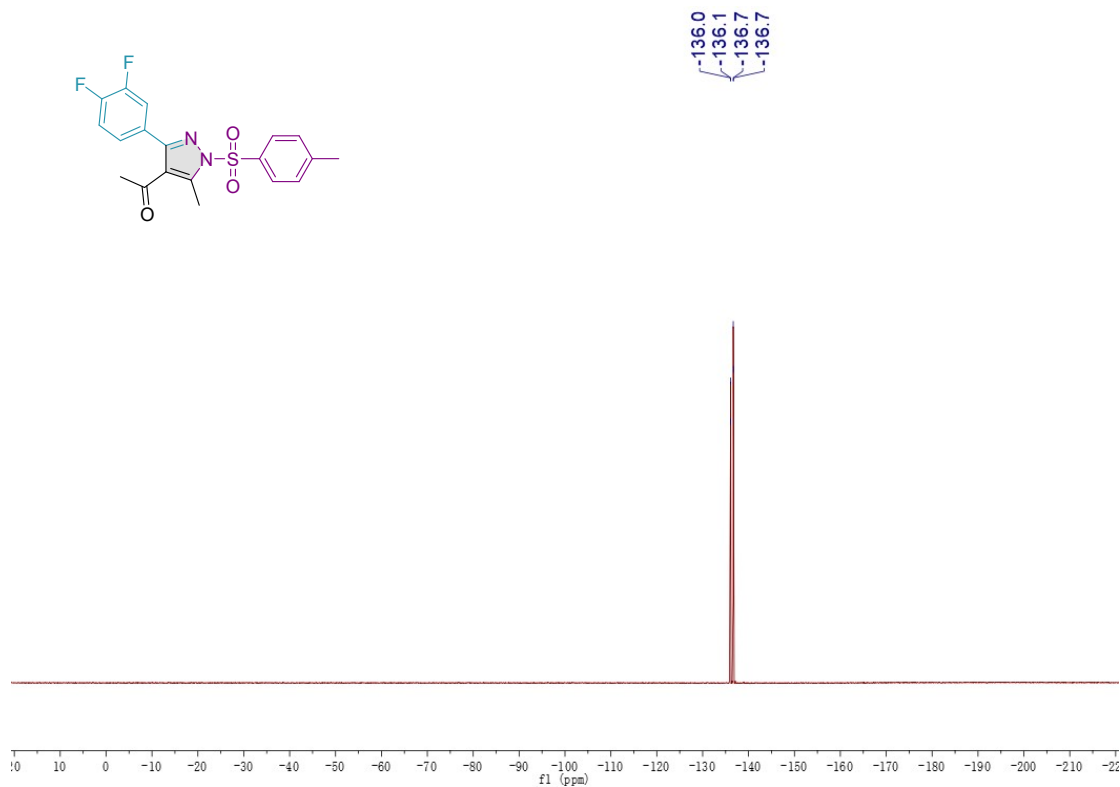

<sup>19</sup>F NMR (376 MHz, CDCl<sub>3</sub>)

1-(3-(2,3-difluorophenyl)-5-methyl-1H-pyrazol-4-yl)ethan-1-one 4-toluenesulfonate (4ak)

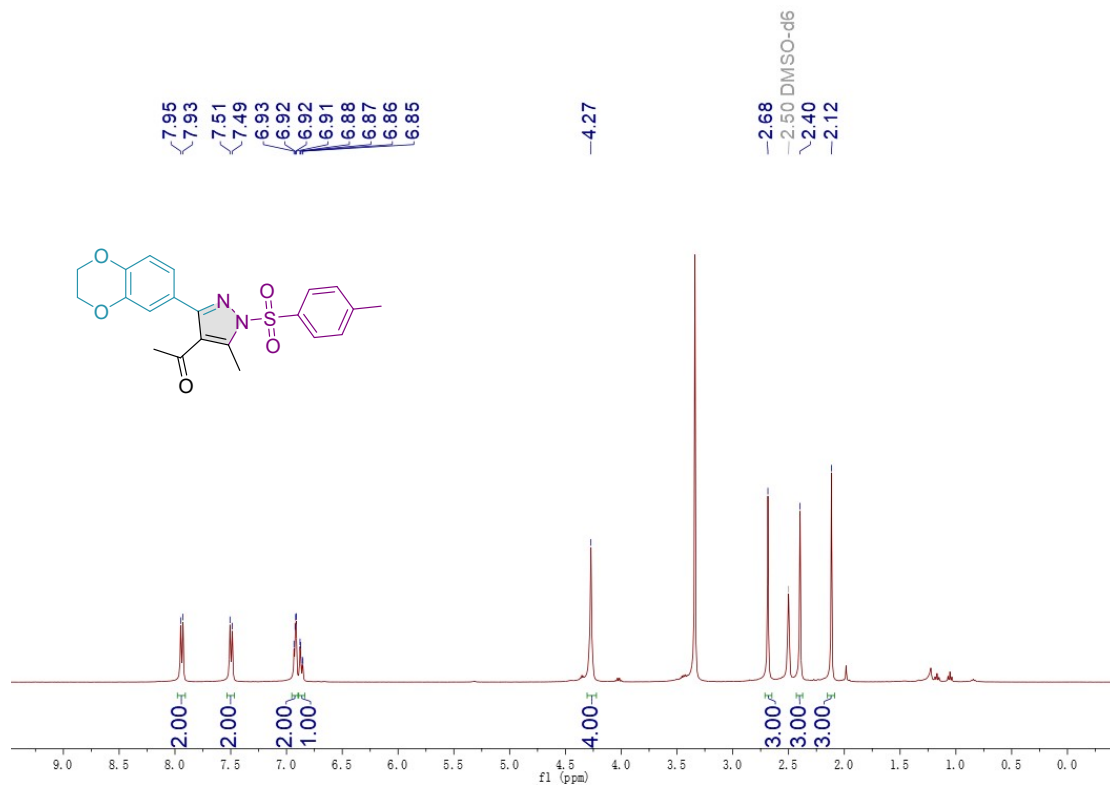

<sup>1</sup>H NMR (400 MHz, DMSO-*d*<sub>6</sub>)

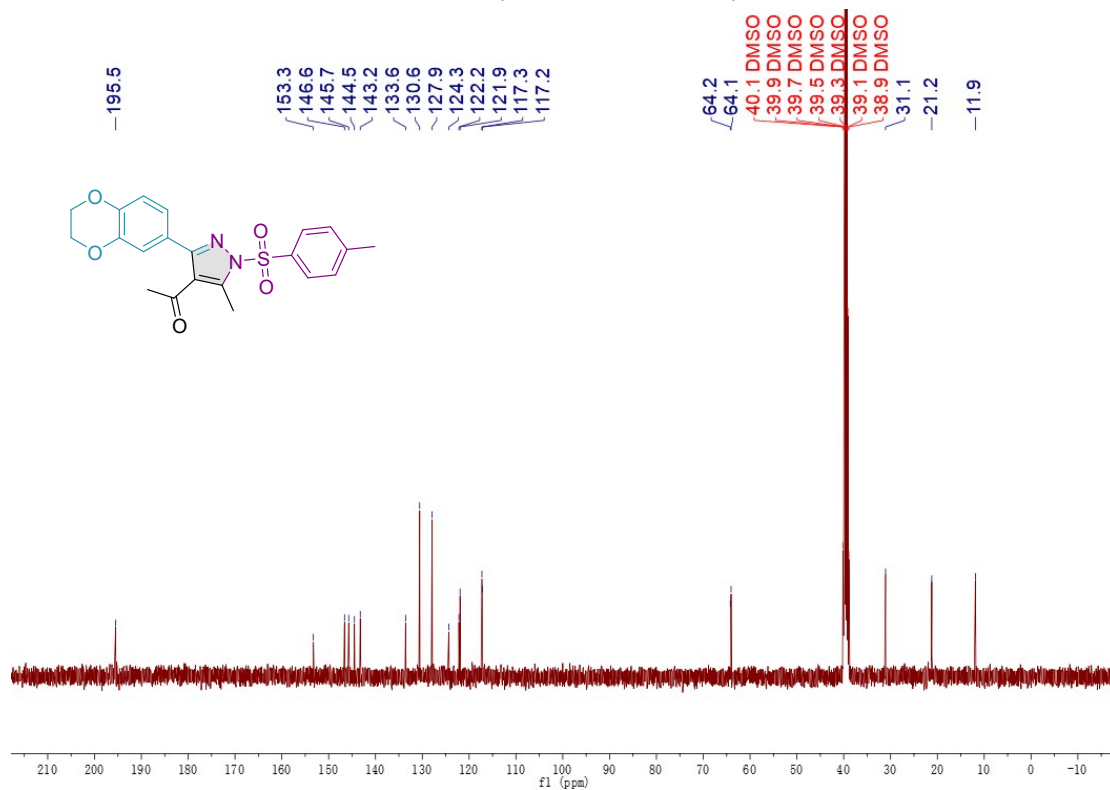

<sup>13</sup>C NMR (100 MHz, DMSO-*d*<sub>6</sub>)

1-(3-(2,2-difluorobenzo[d][1,3]dioxol-5-yl)-5-methyl-1-tosyl-1*H*-pyrazol-4-yl)ethan-1-one (4a)

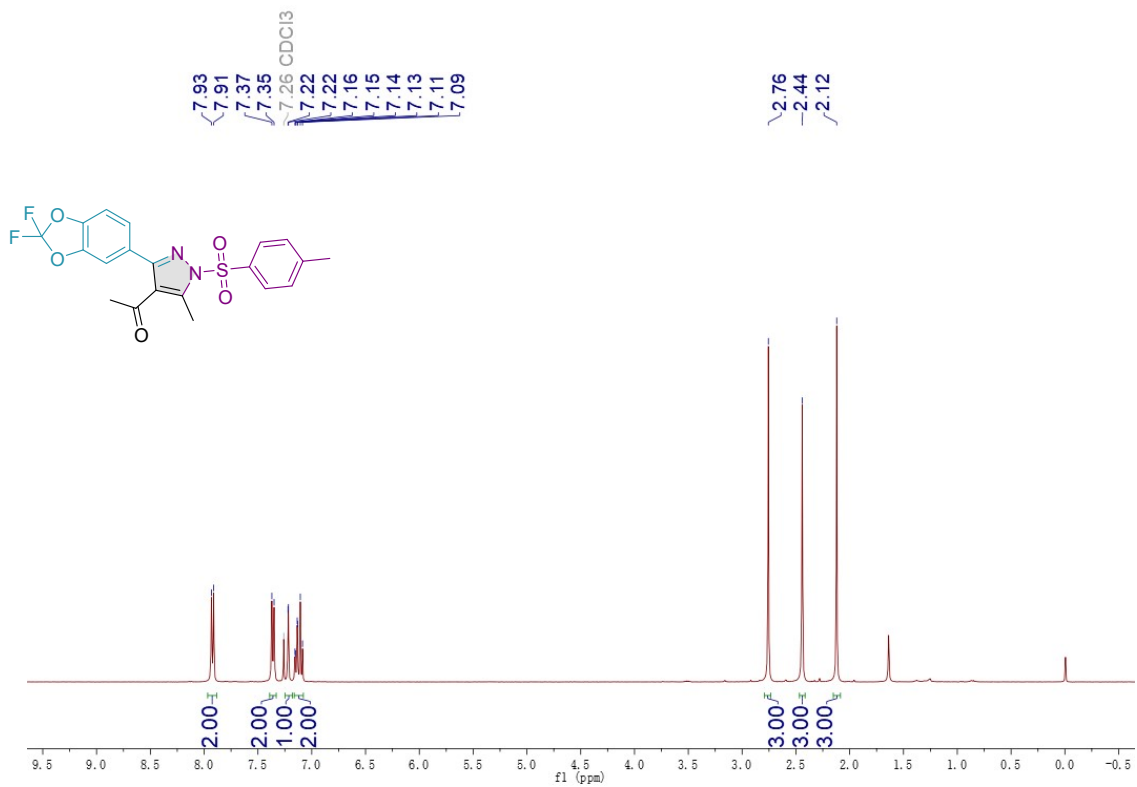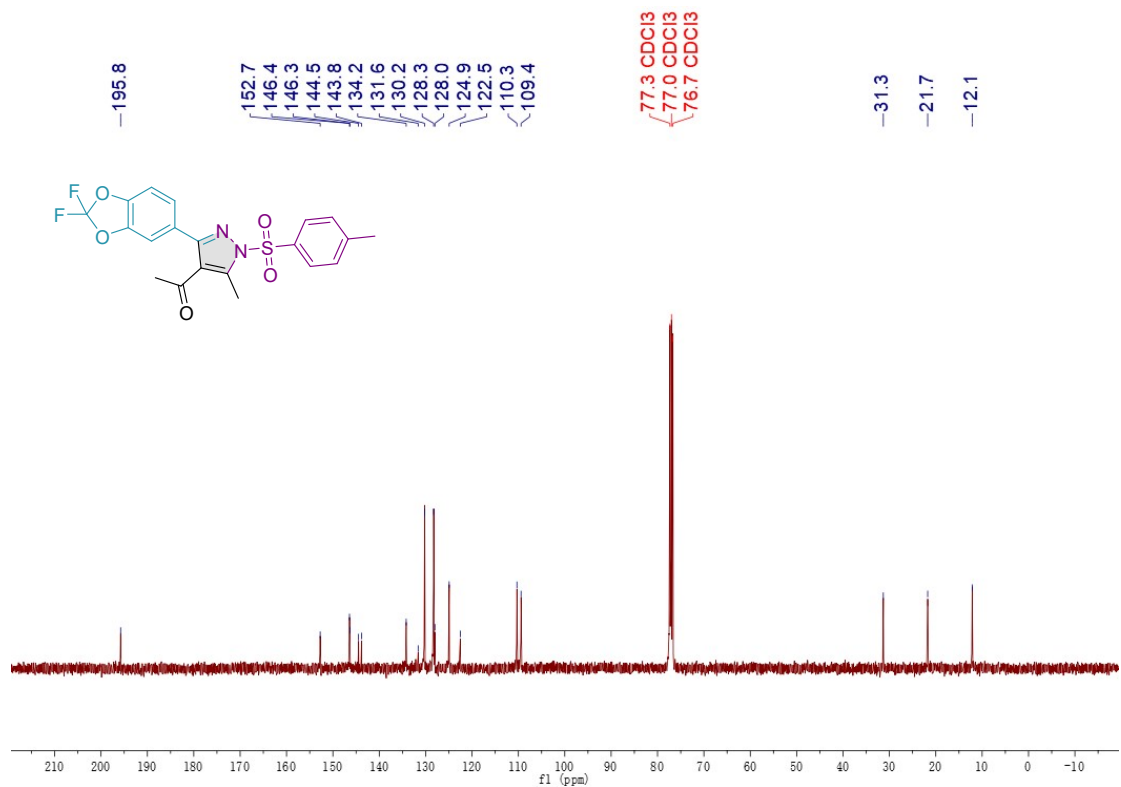

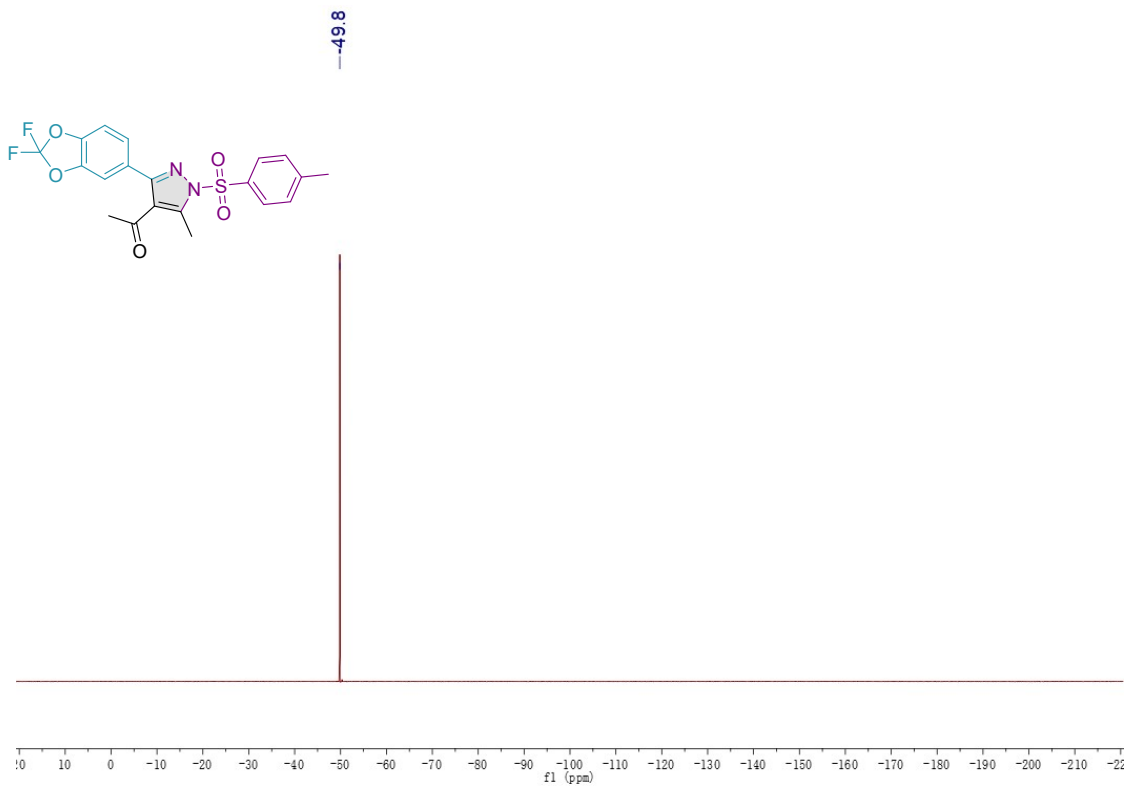

$^{19}\text{F}$  NMR (376 MHz,  $\text{CDCl}_3$ )

**4-(4-acetyl-5-methyl-1-tosyl-1H-pyrazol-3-yl)-2-methoxyphenyl acetate (4am)**

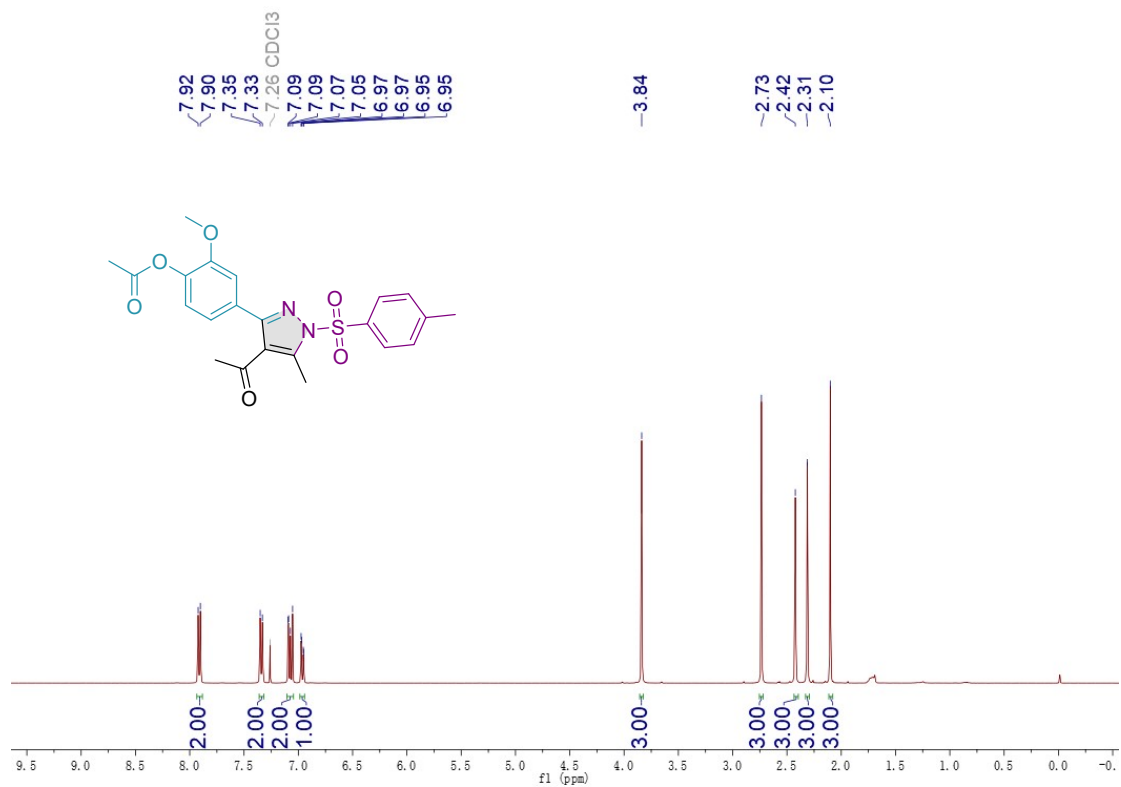

$^1\text{H}$  NMR (400 MHz,  $\text{CDCl}_3$ )

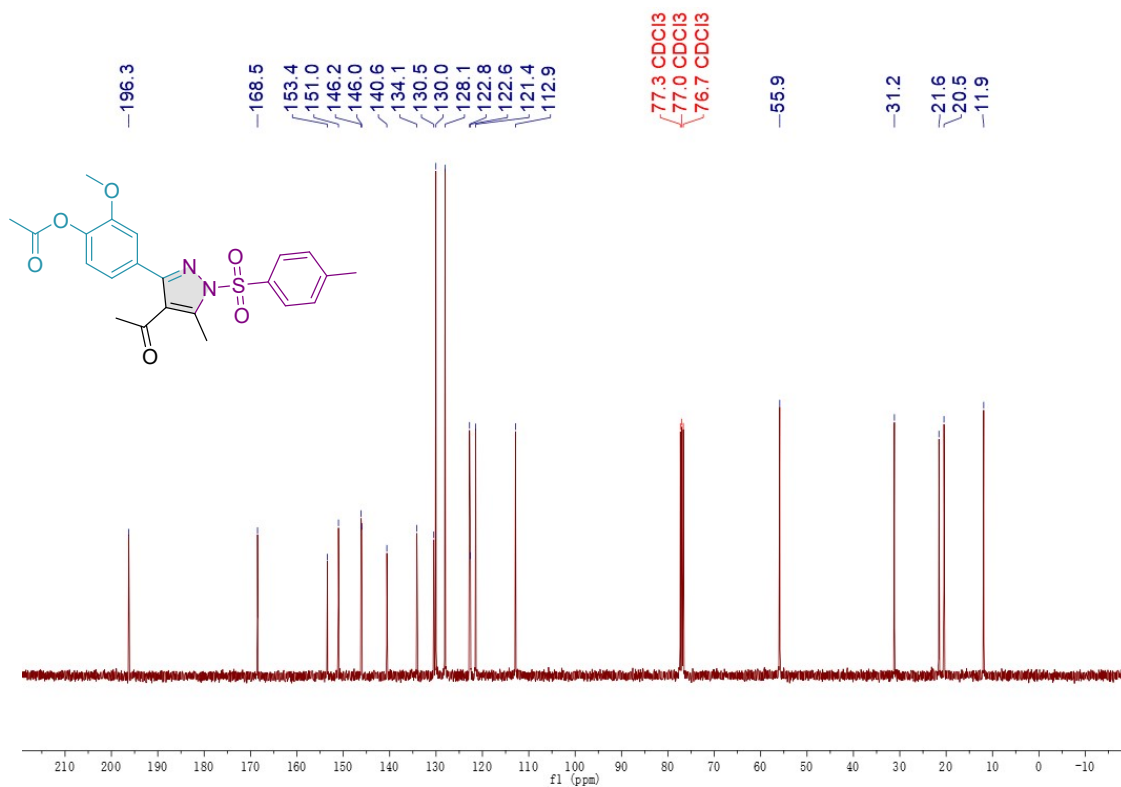

<sup>13</sup>C NMR (100 MHz, CDCl<sub>3</sub>)

**1-(5-methyl-3-(naphthalen-2-yl)-1H-pyrazol-4-yl)ethan-1-one (4an)**

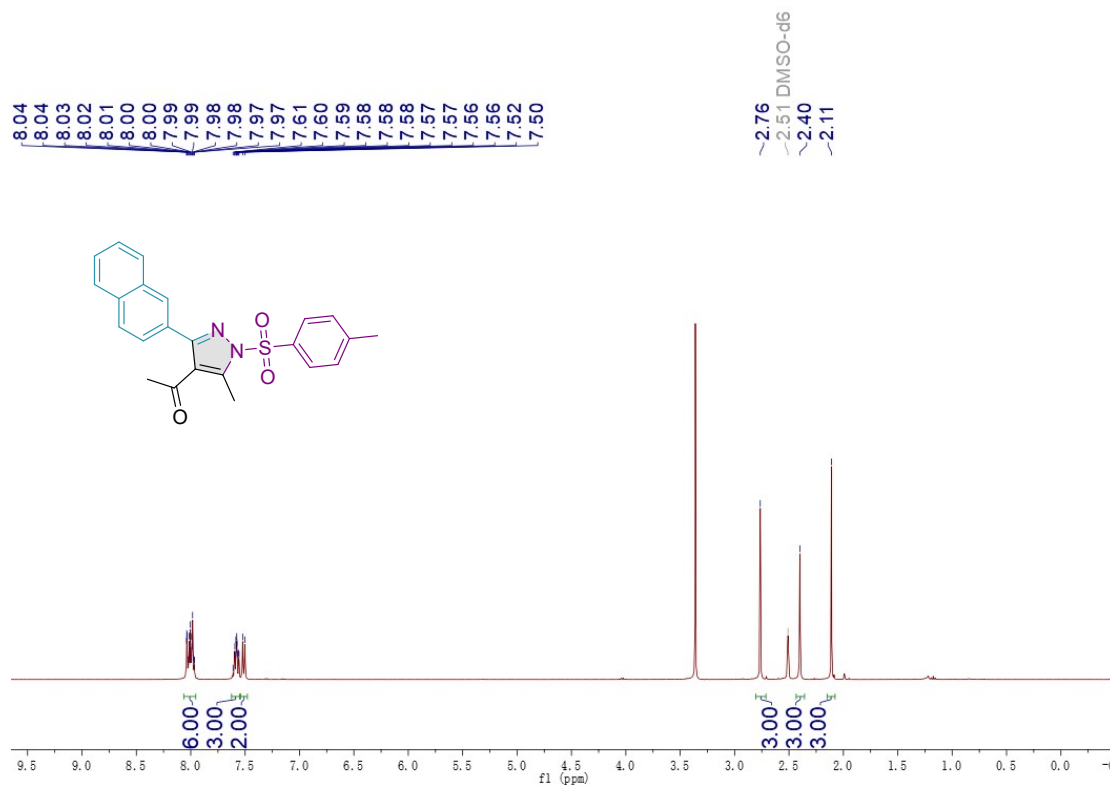

<sup>1</sup>H NMR (400 MHz, DMSO-*d*<sub>6</sub>)

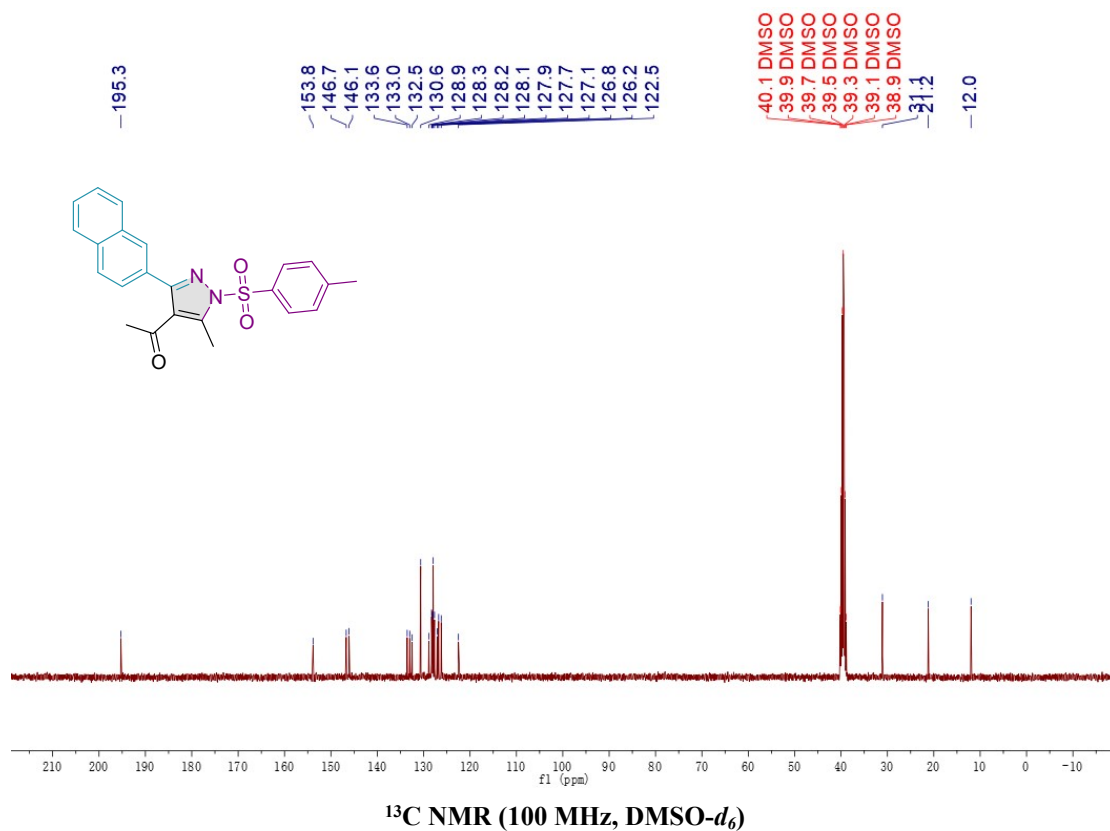

**1-(3-(4-bromo-3,5-dimethoxyphenyl)-5-methyl-1H-pyrazol-4-yl)ethan-1-one (4ao)**

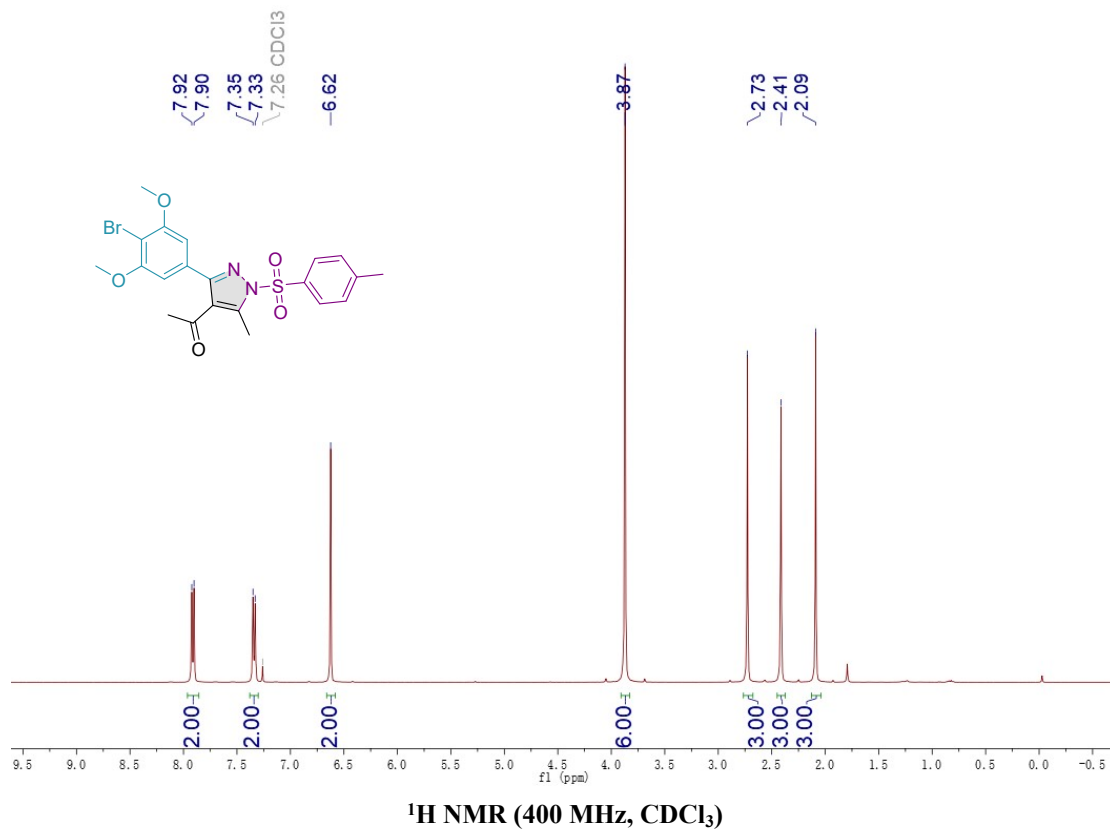

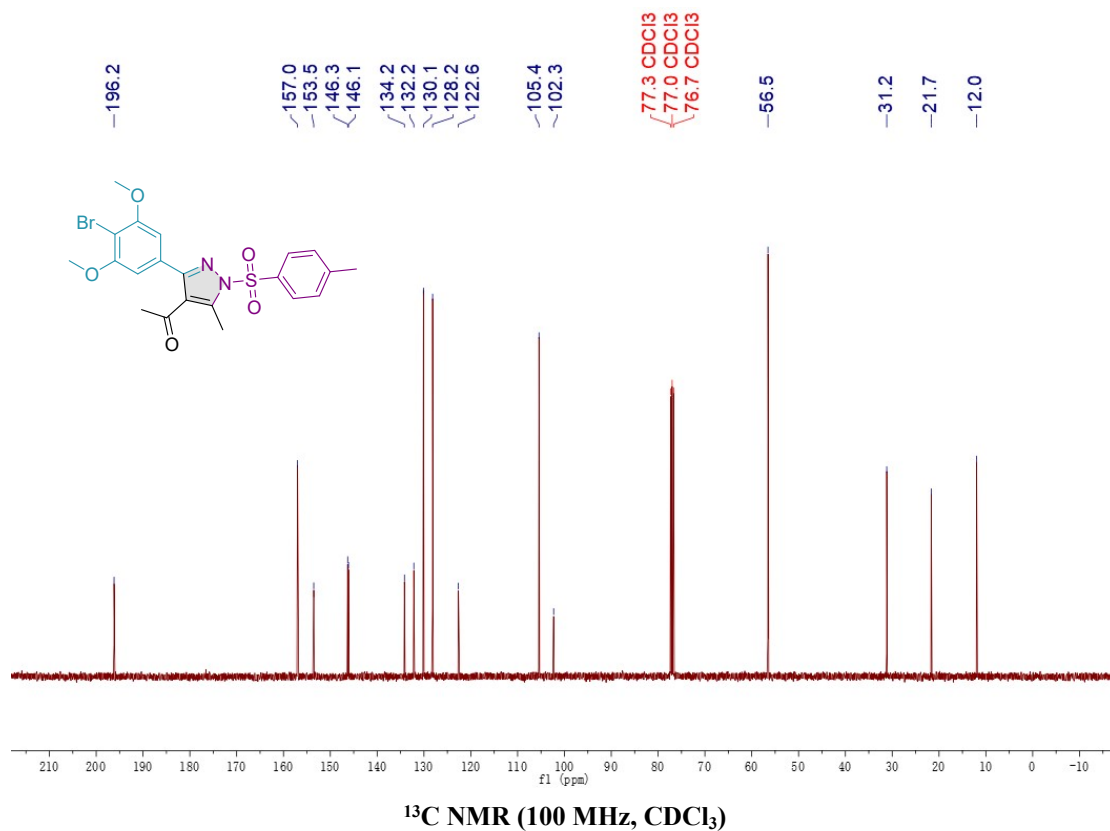

**1-(3-(4-bromophenyl)-5-methyl-1-(phenylsulfonyl)-1H-pyrazol-4-yl)ethan-1-one (4ap)**

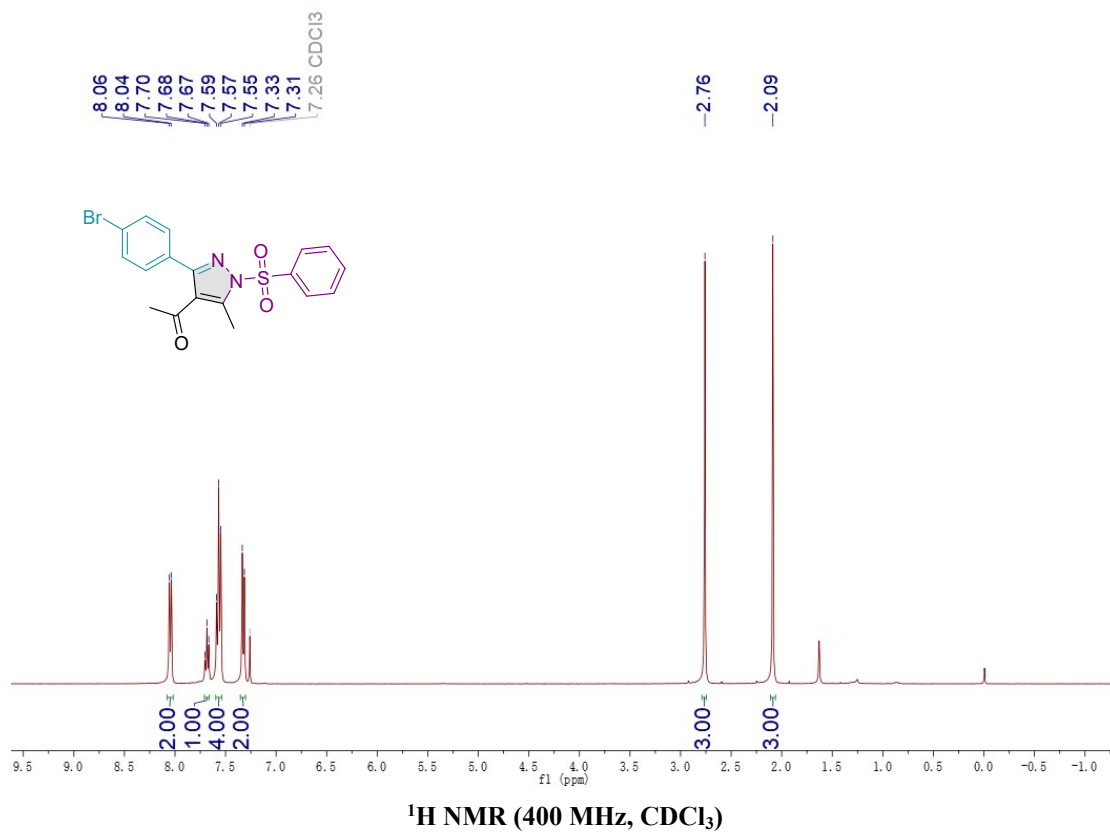

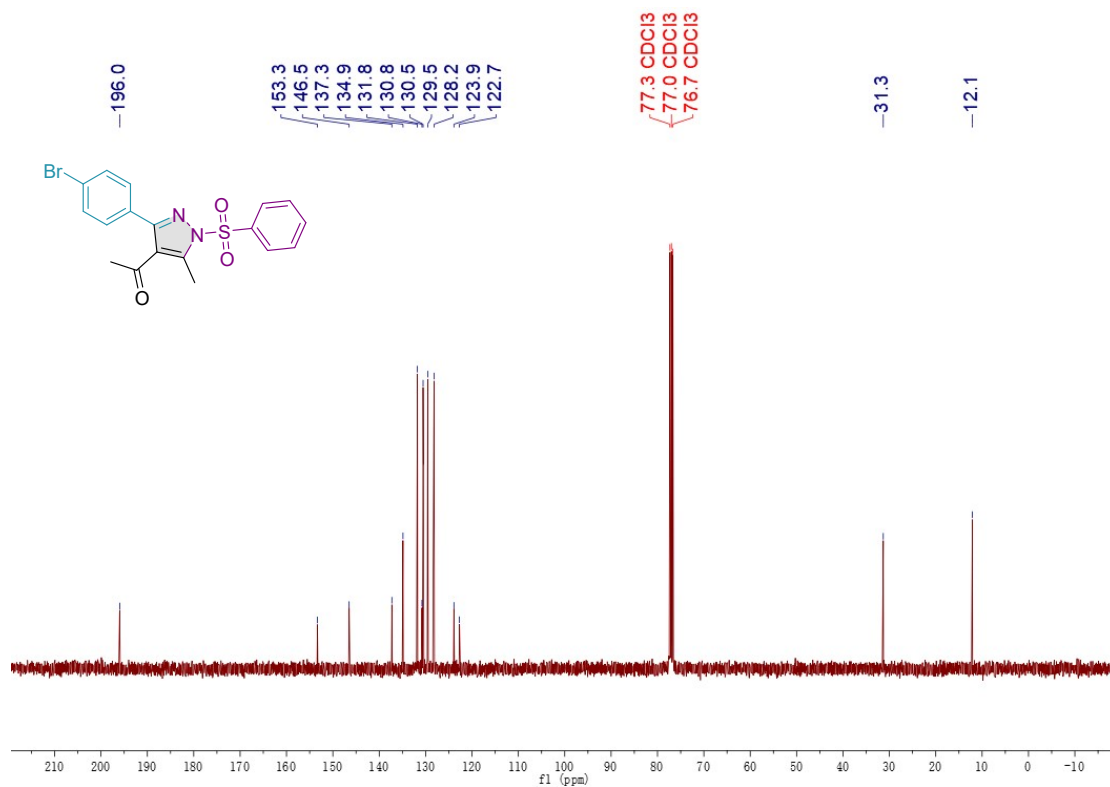

<sup>13</sup>C NMR (100 MHz, CDCl<sub>3</sub>)

**1-(3-(4-bromophenyl)-1-((4-chlorophenyl)sulfonyl)-5-methyl-1H-pyrazol-4-yl)ethan-1-one (4aq)**

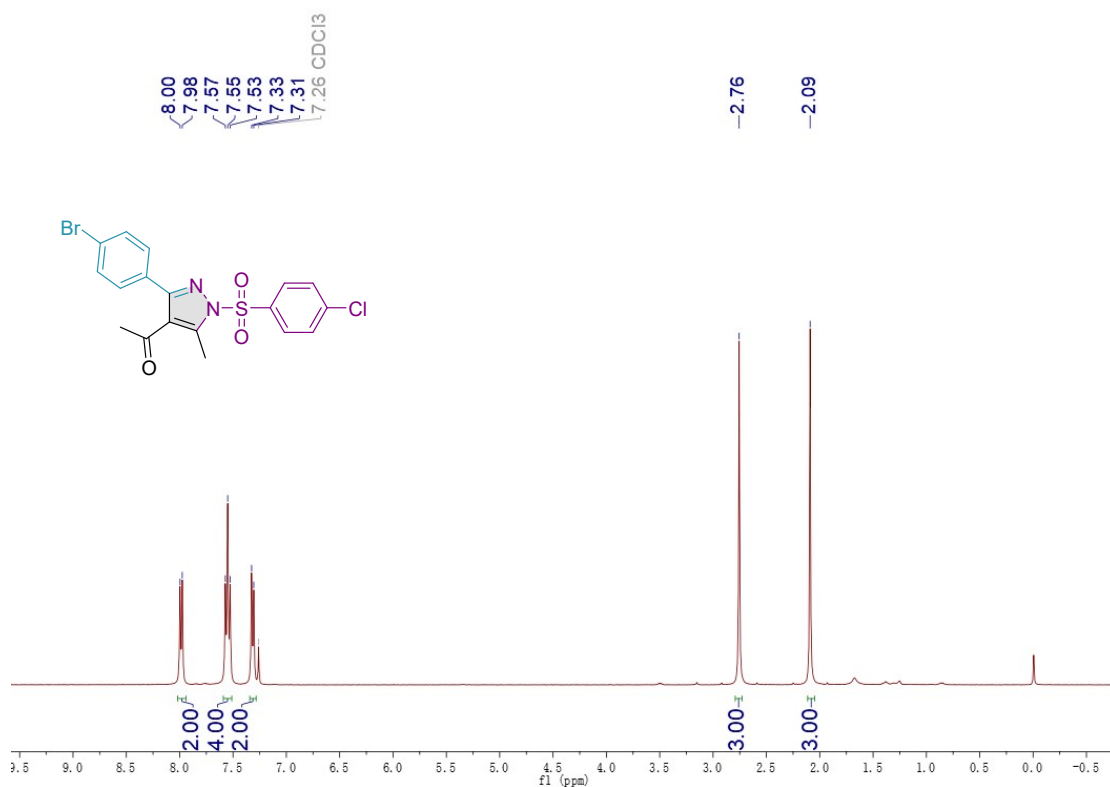

<sup>1</sup>H NMR (400 MHz, CDCl<sub>3</sub>)



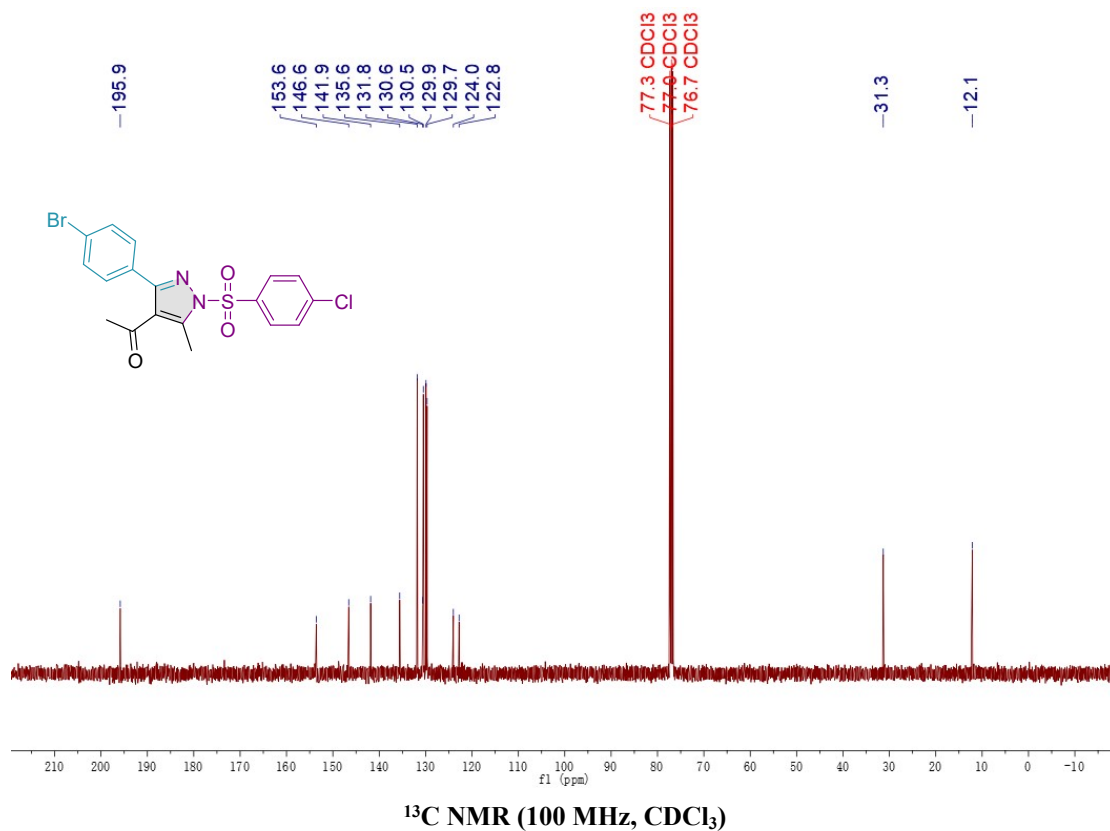

**1-(3-(4-bromophenyl)-1-((4-fluorophenyl)sulfonyl)-5-methyl-1H-pyrazol-4-yl)ethan-1-one (4ar)**

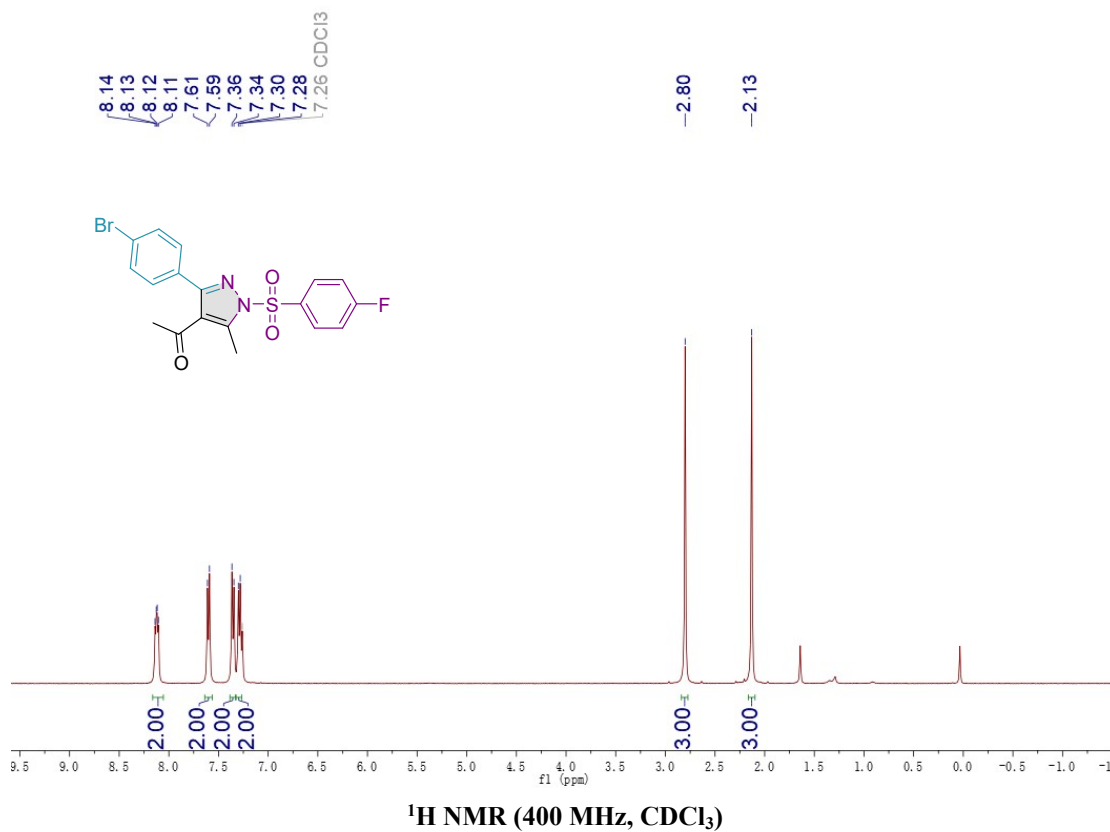

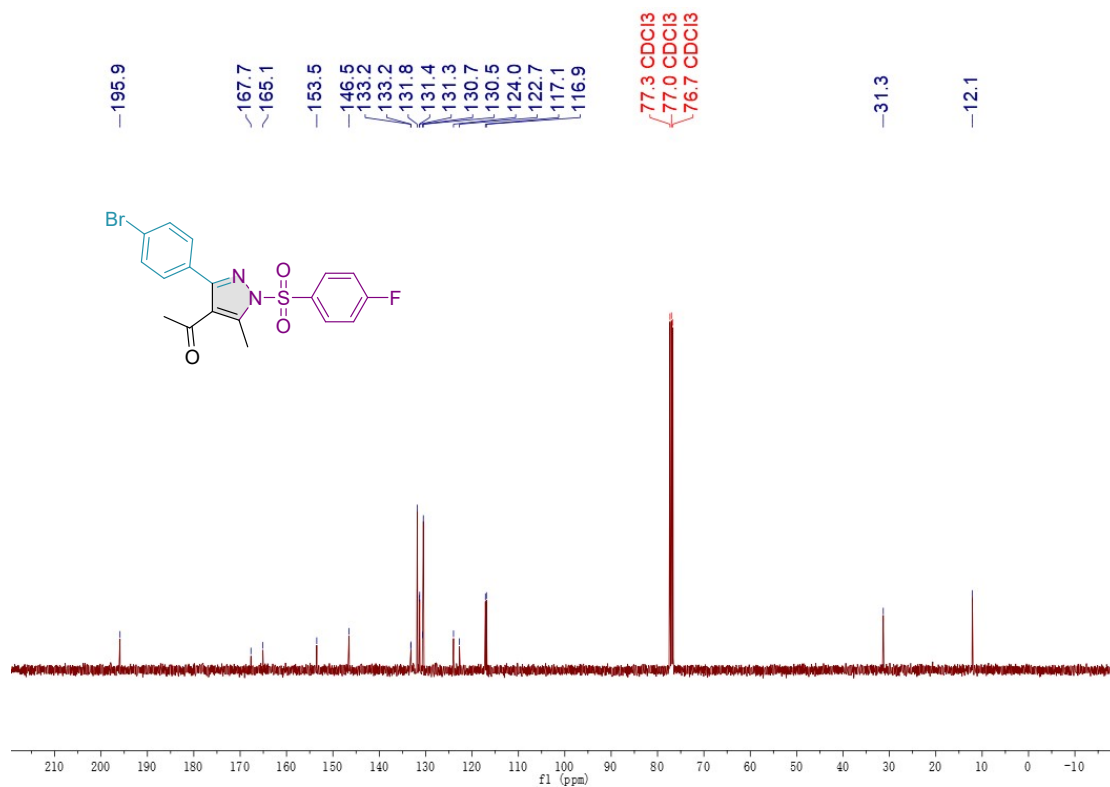

<sup>13</sup>C NMR (100 MHz, CDCl<sub>3</sub>)

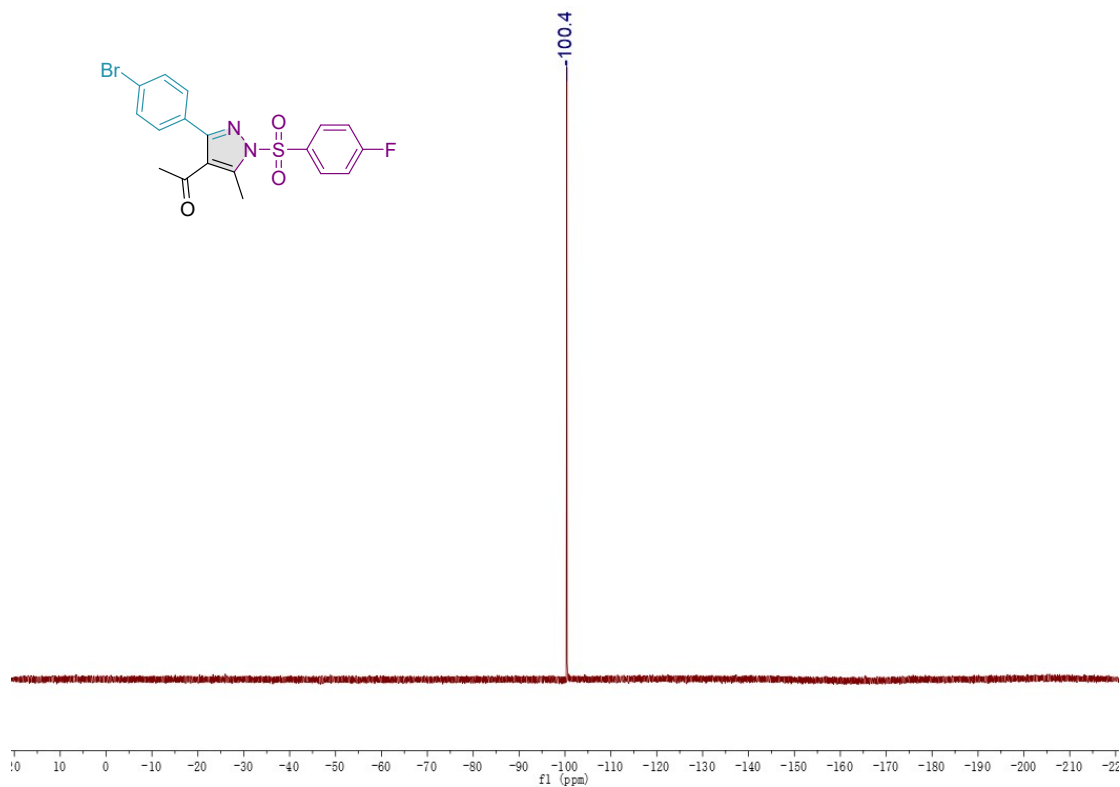

<sup>19</sup>F NMR (376 MHz, CDCl<sub>3</sub>)

1-(3-(4-bromophenyl)-1-((3-fluorophenyl)sulfonyl)-5-methyl-1H-pyrazol-4-yl)ethan-1-one (4as)

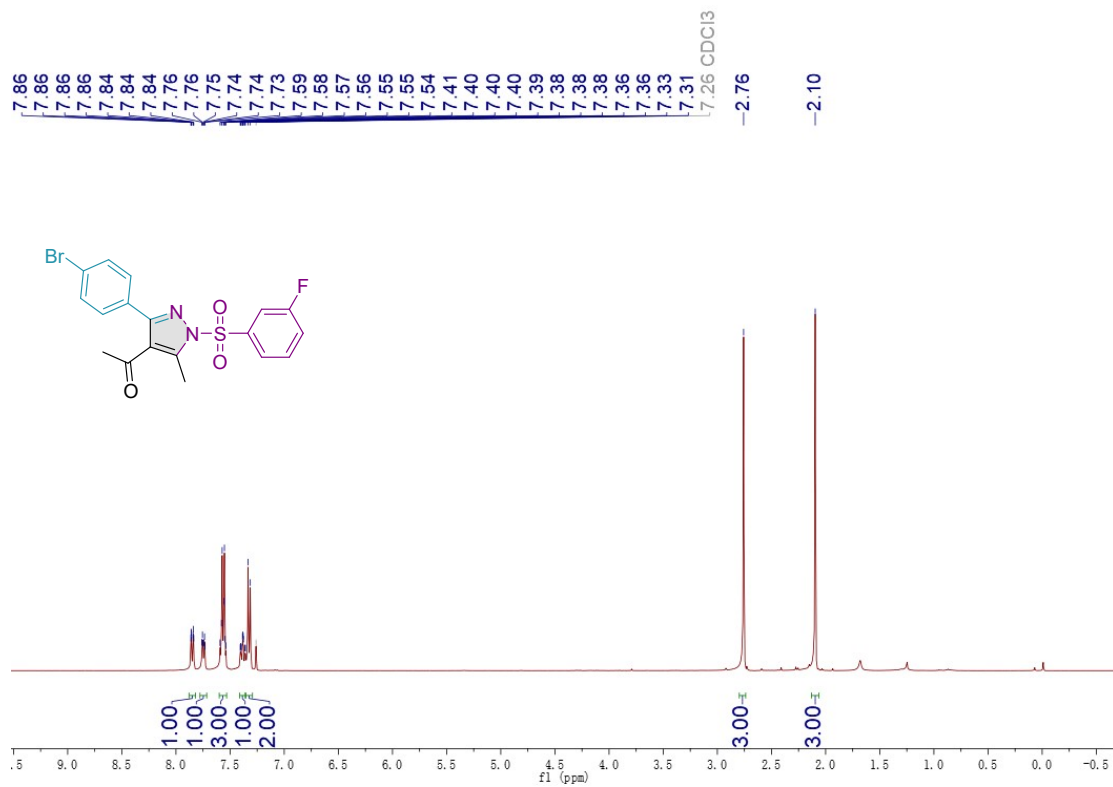

<sup>1</sup>H NMR (400 MHz, CDCl<sub>3</sub>)

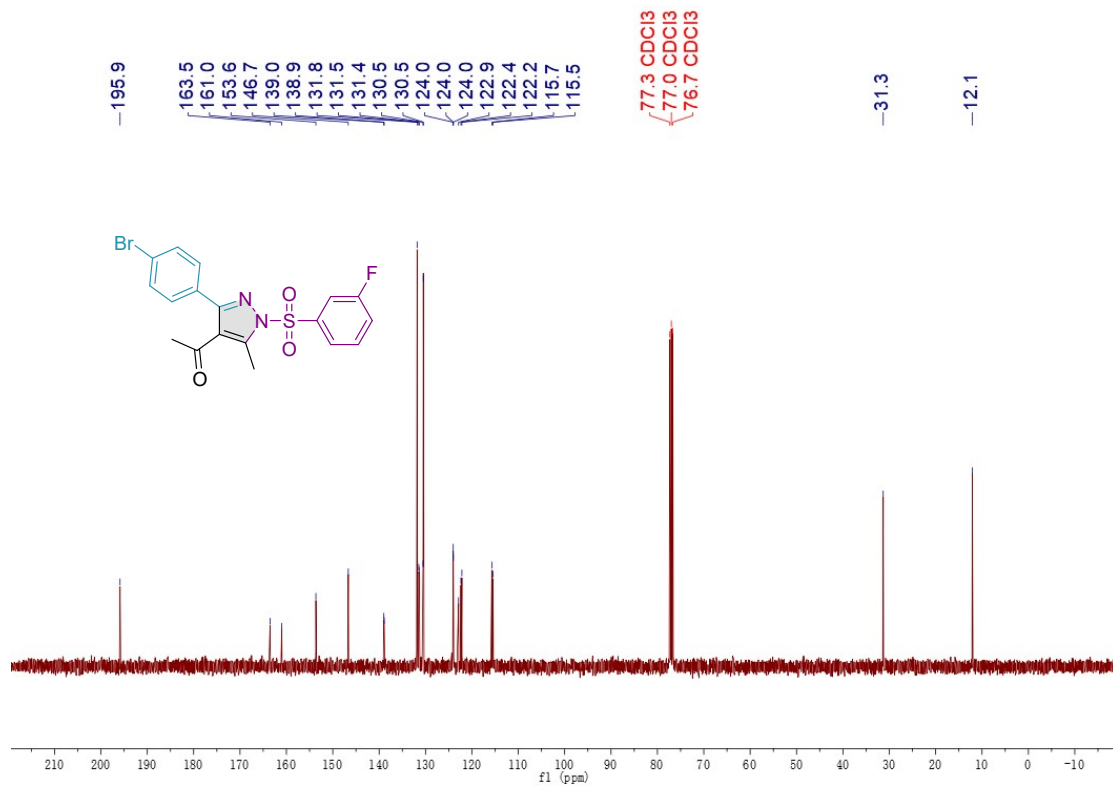

<sup>13</sup>C NMR (100 MHz, CDCl<sub>3</sub>)

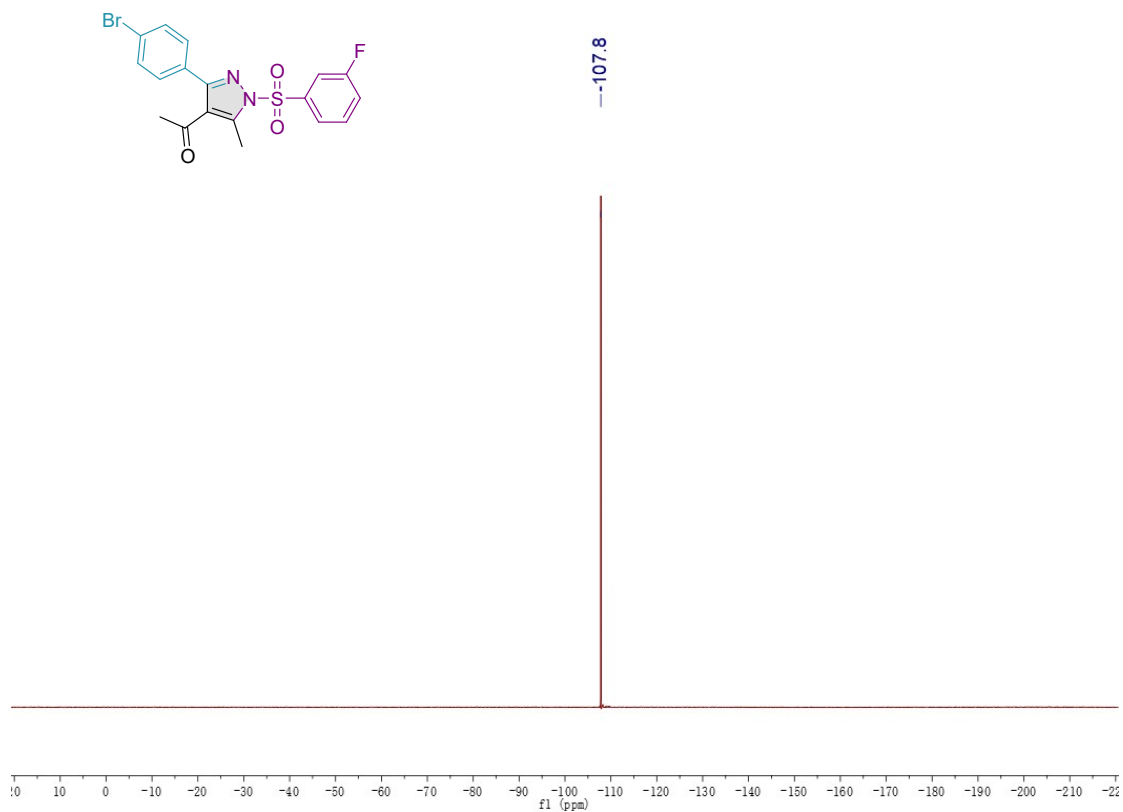

$^{19}\text{F}$  NMR (376 MHz,  $\text{CDCl}_3$ )

1-(3-(4-bromophenyl)-1-((4-methoxyphenyl)sulfonyl)-5-methyl-1H-pyrazol-4-yl)ethan-1-one (4at)

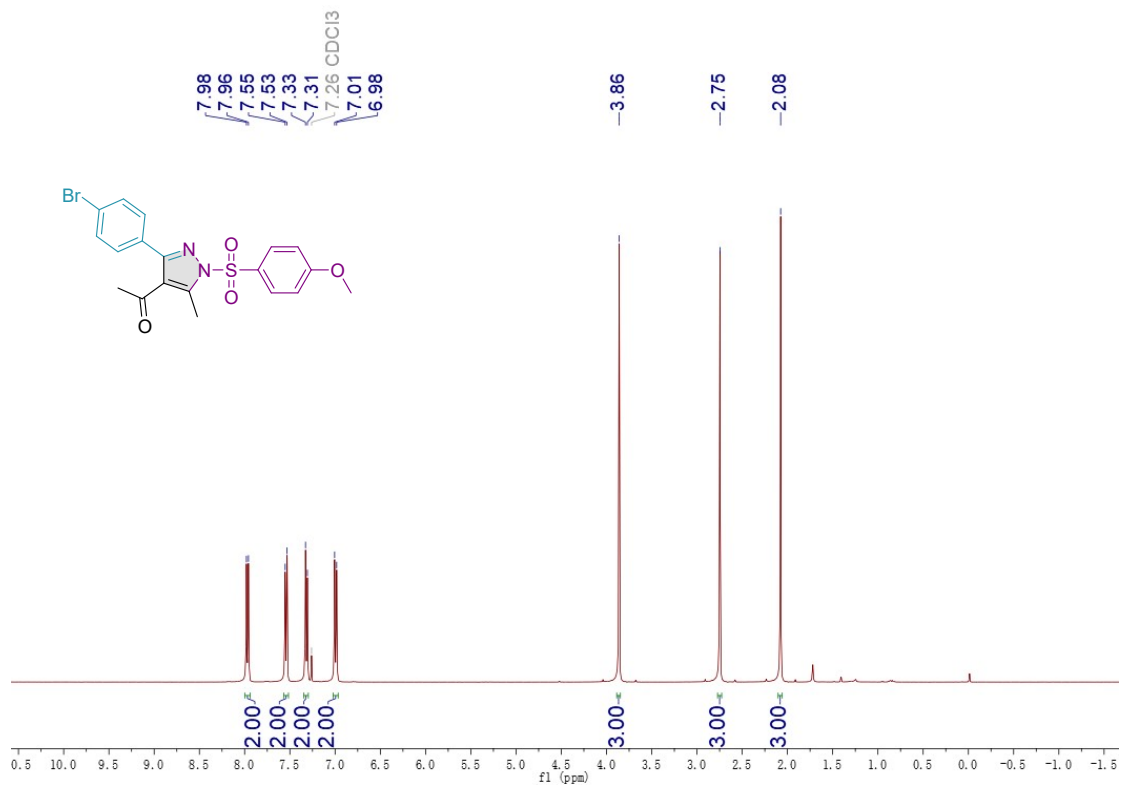

$^1\text{H}$  NMR (400 MHz,  $\text{CDCl}_3$ )

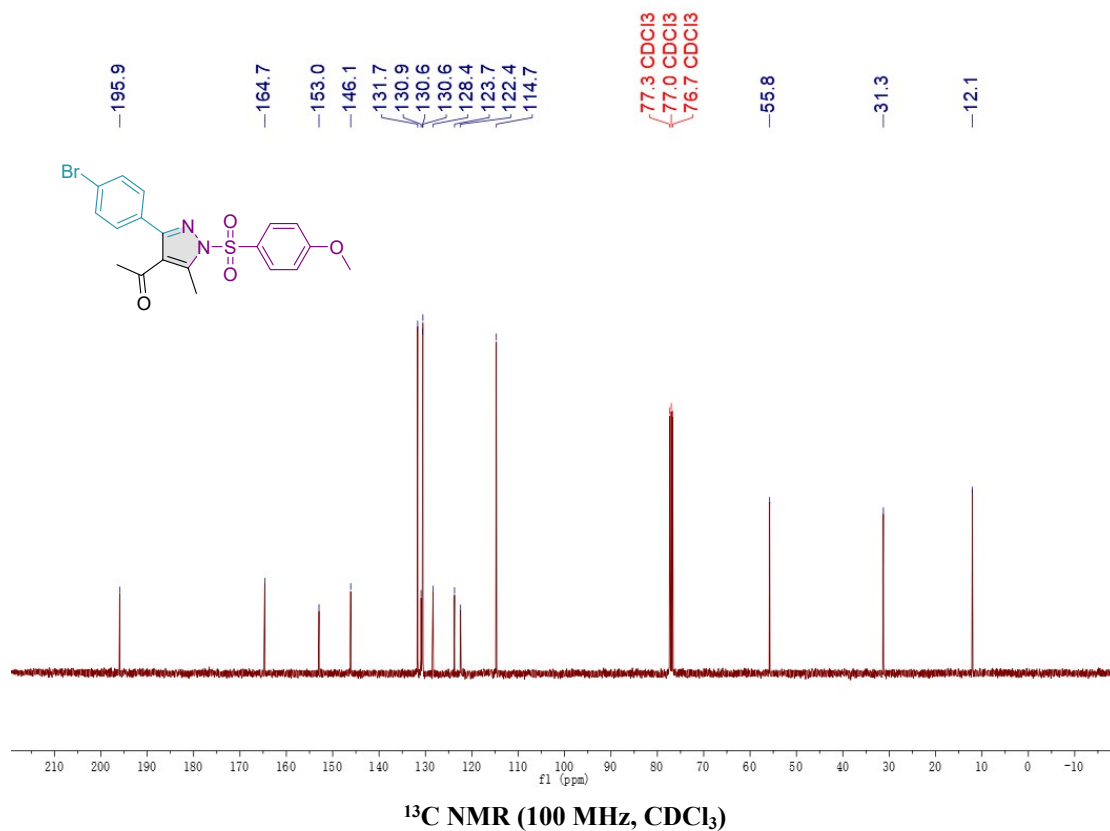

**1-(3-(4-bromophenyl)-5-methyl-1-((4-(trifluoromethoxy)phenyl)sulfonyl)-1H-pyrazol-4-yl)ethan-1-one (4au)**

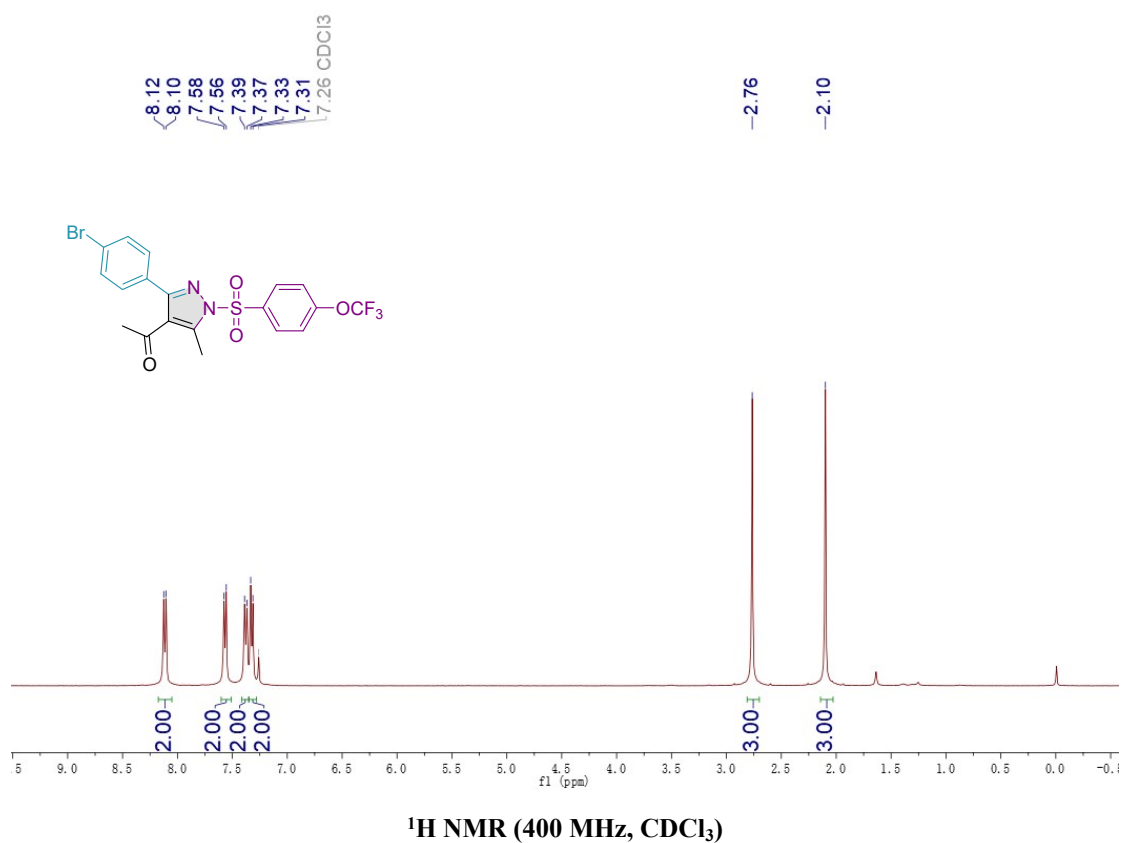

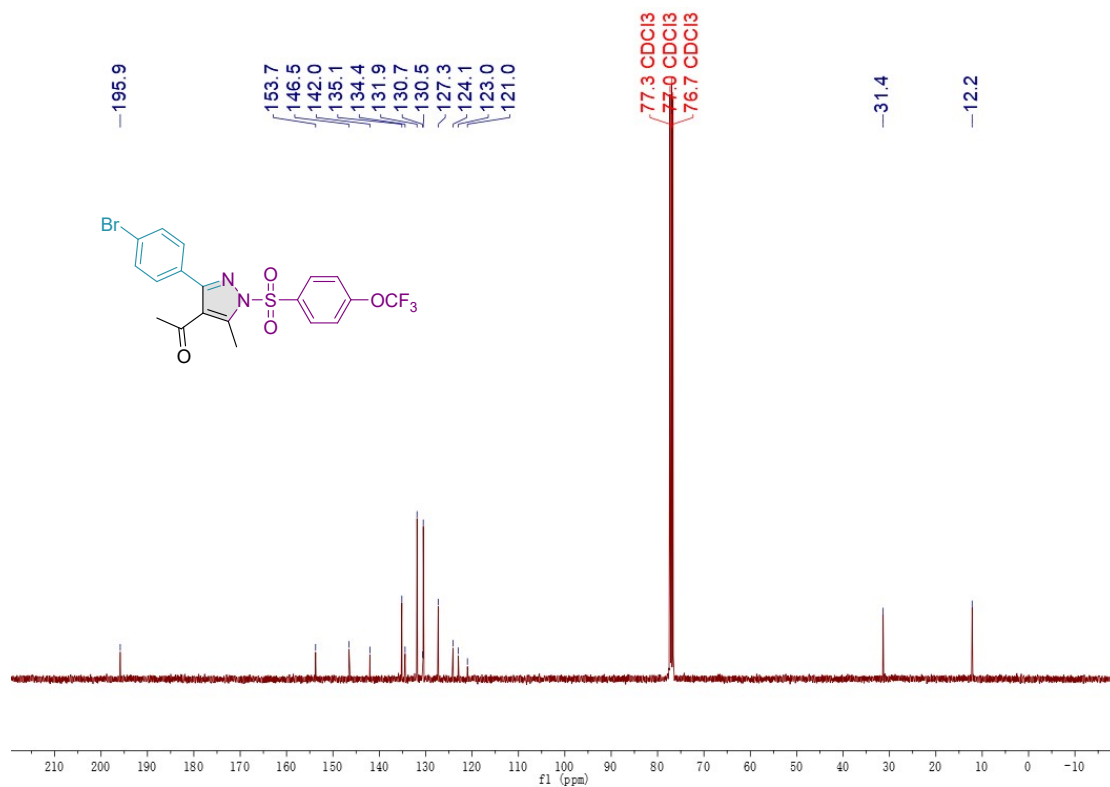

<sup>13</sup>C NMR (100 MHz, CDCl<sub>3</sub>)

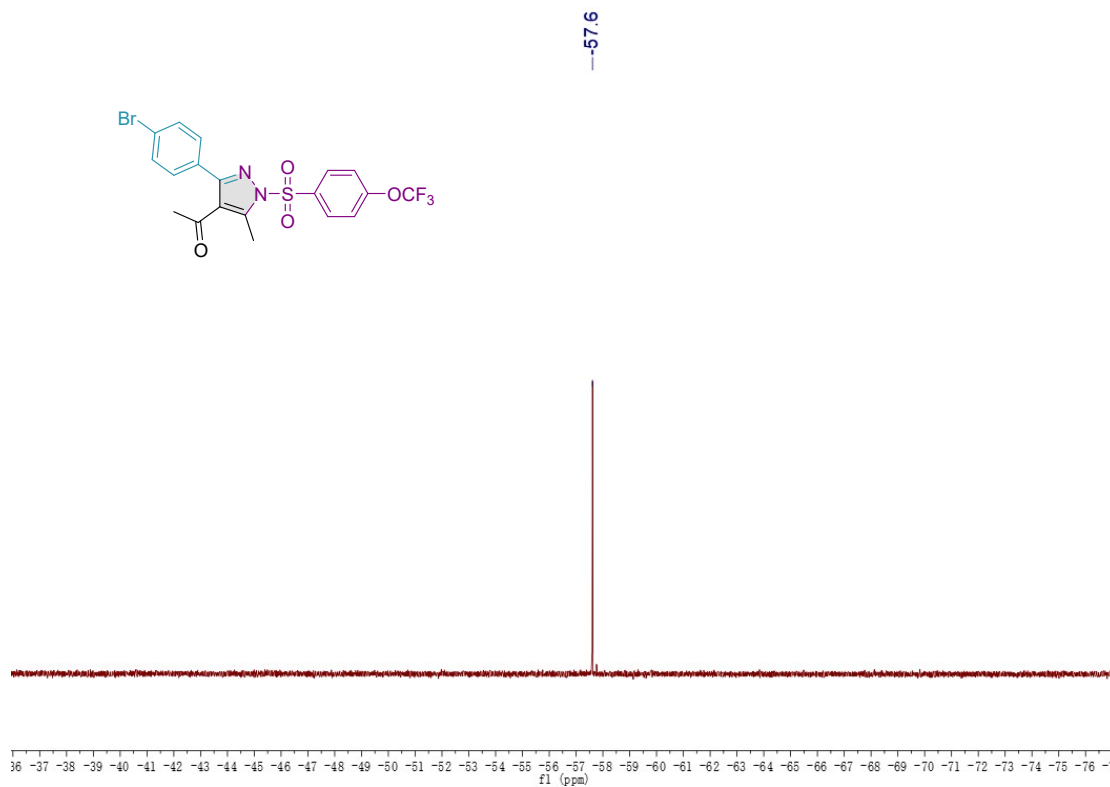

<sup>19</sup>F NMR (376 MHz, CDCl<sub>3</sub>)

**1-(3-(4-bromophenyl)-1-((4-(tert-butyl)phenyl)sulfonyl)-5-methyl-1H-pyrazol-4-yl)ethan-1-one**  
**(4av)**

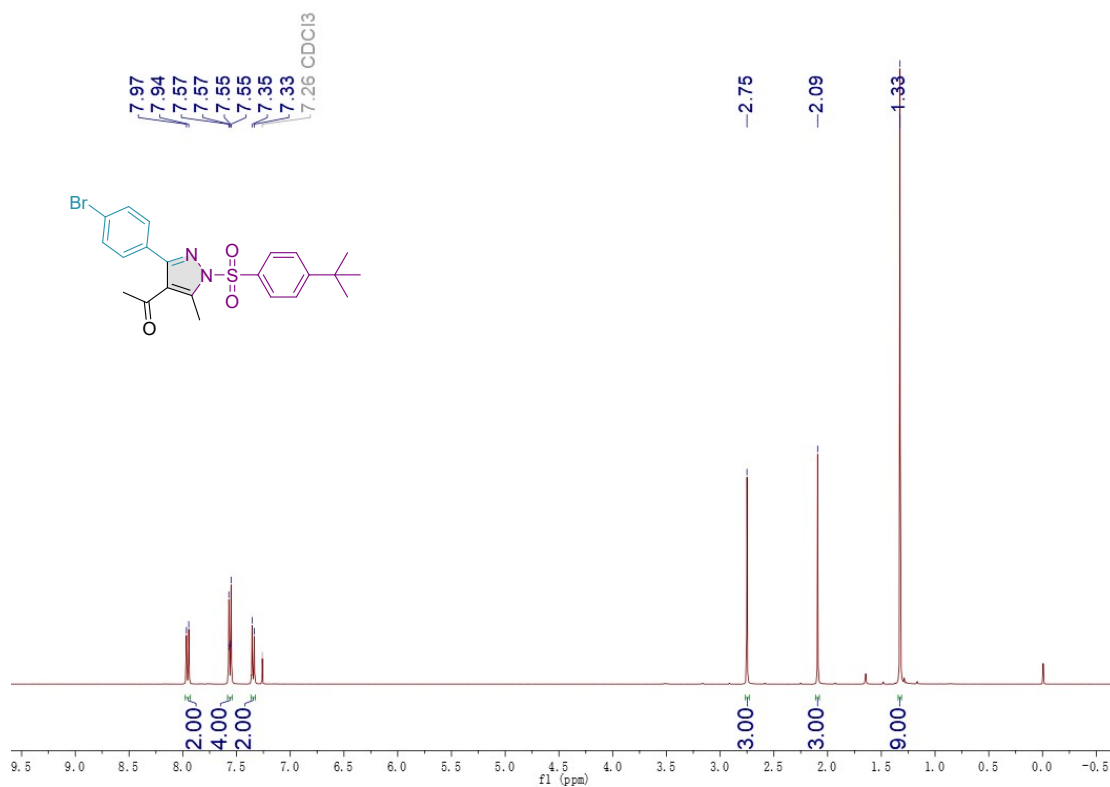

<sup>1</sup>H NMR (400 MHz, CDCl<sub>3</sub>)

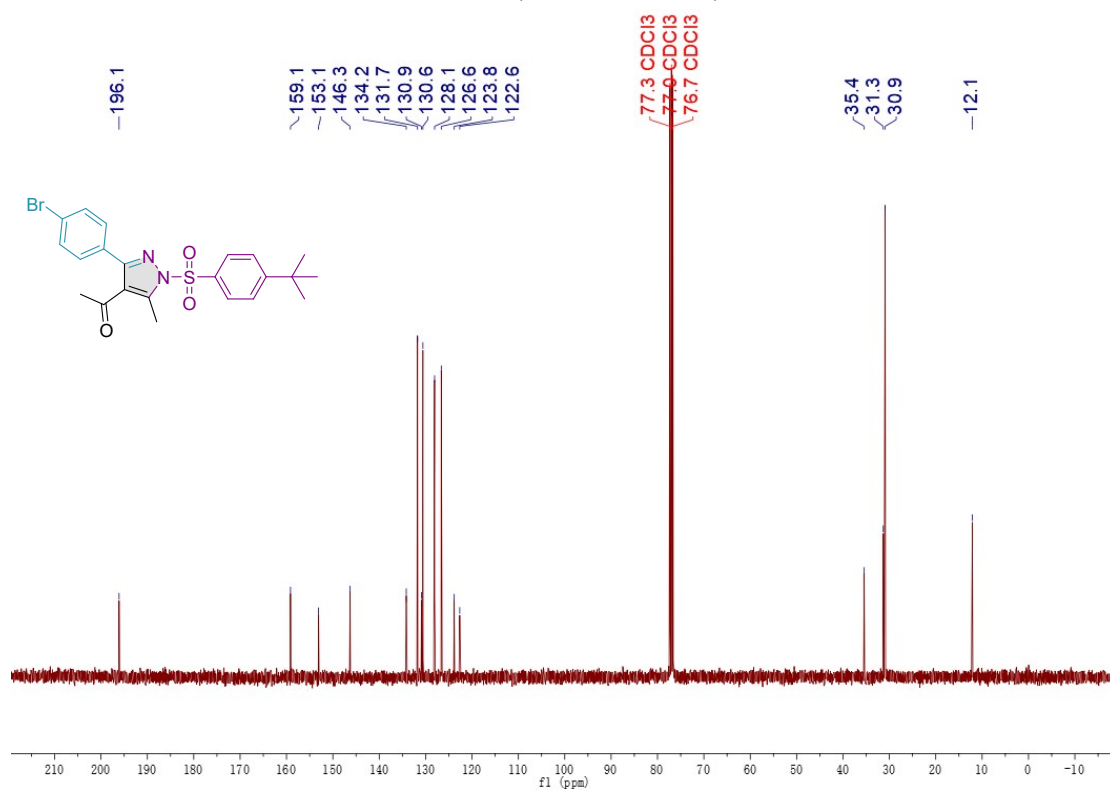

<sup>13</sup>C NMR (100 MHz, CDCl<sub>3</sub>)

1-(1-([1,1'-biphenyl]-4-ylsulfonyl)-3-(4-bromophenyl)-5-methyl-1H-pyrazol-4-yl)ethan-1-one

(4aw)

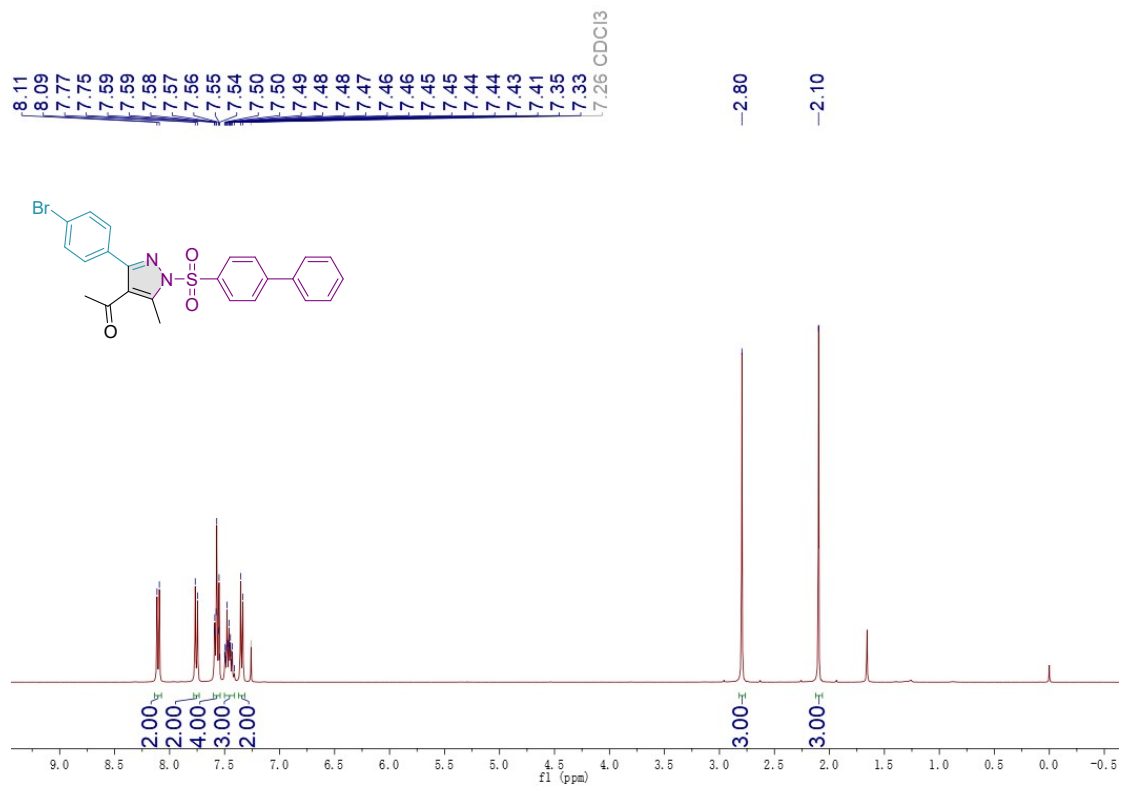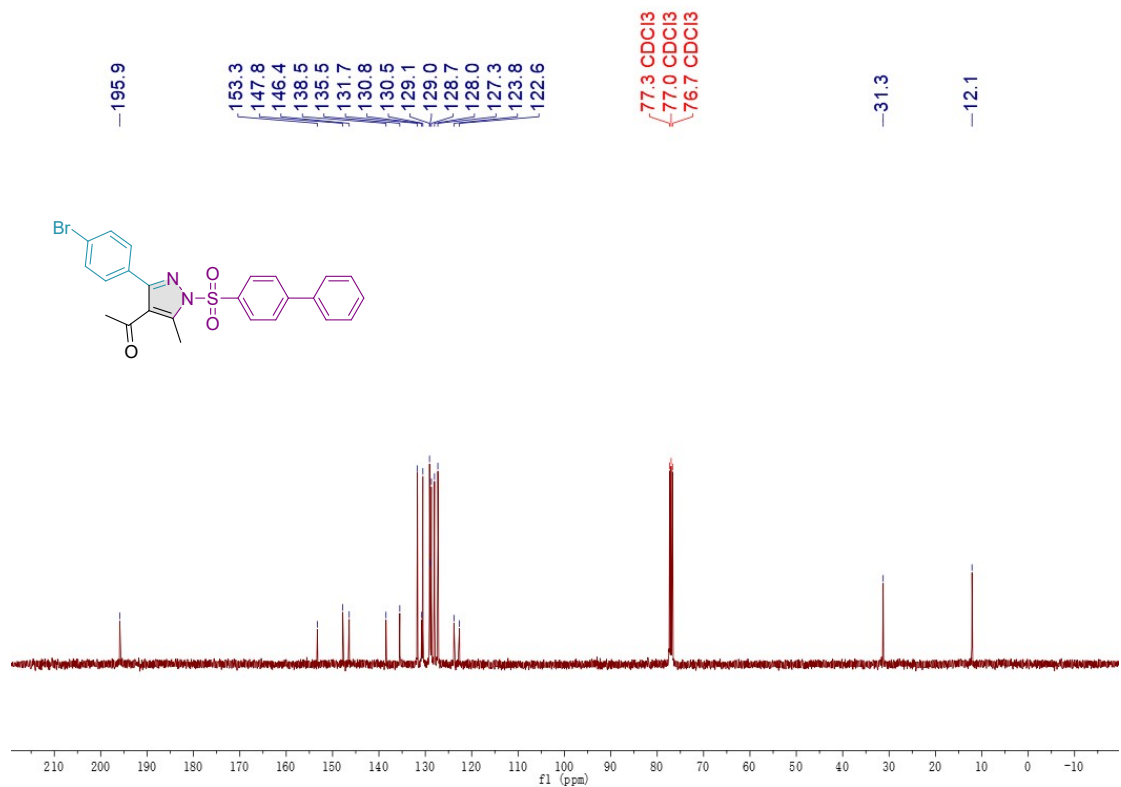

**N-(4-((4-acetyl-3-(4-bromophenyl)-5-methyl-1H-pyrazol-1-yl)sulfonyl)phenyl)acetamide (4ax)**



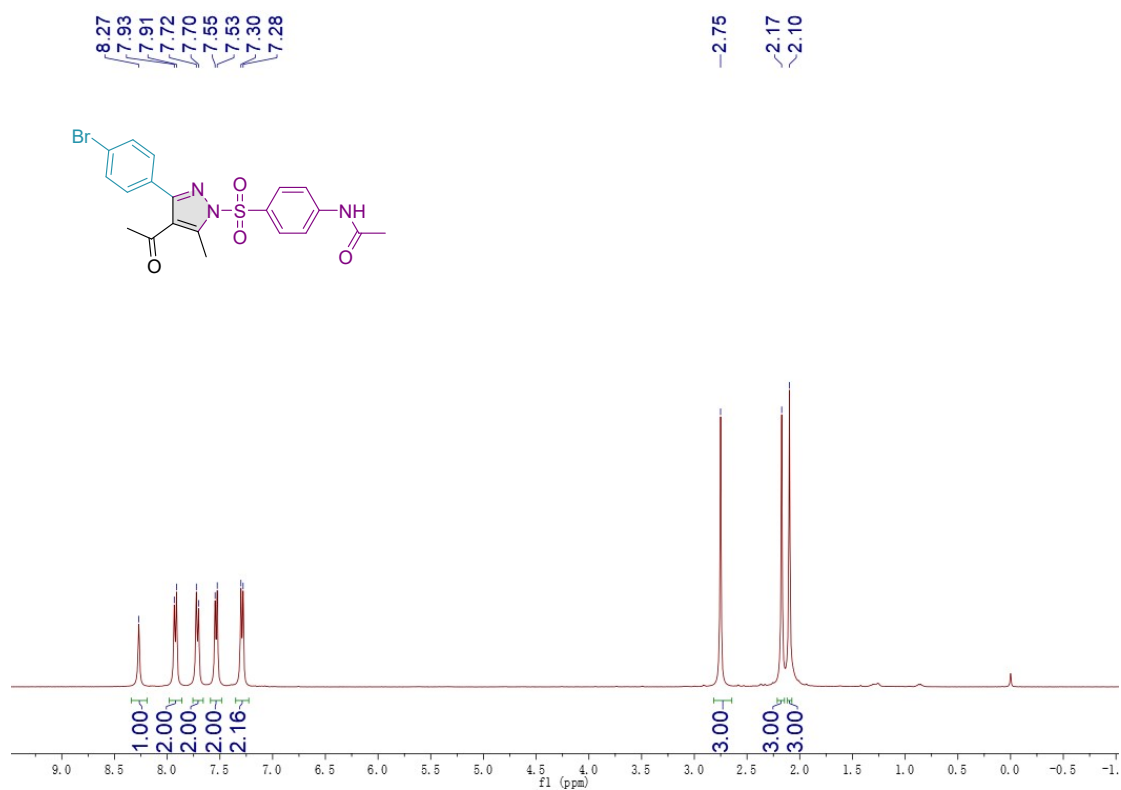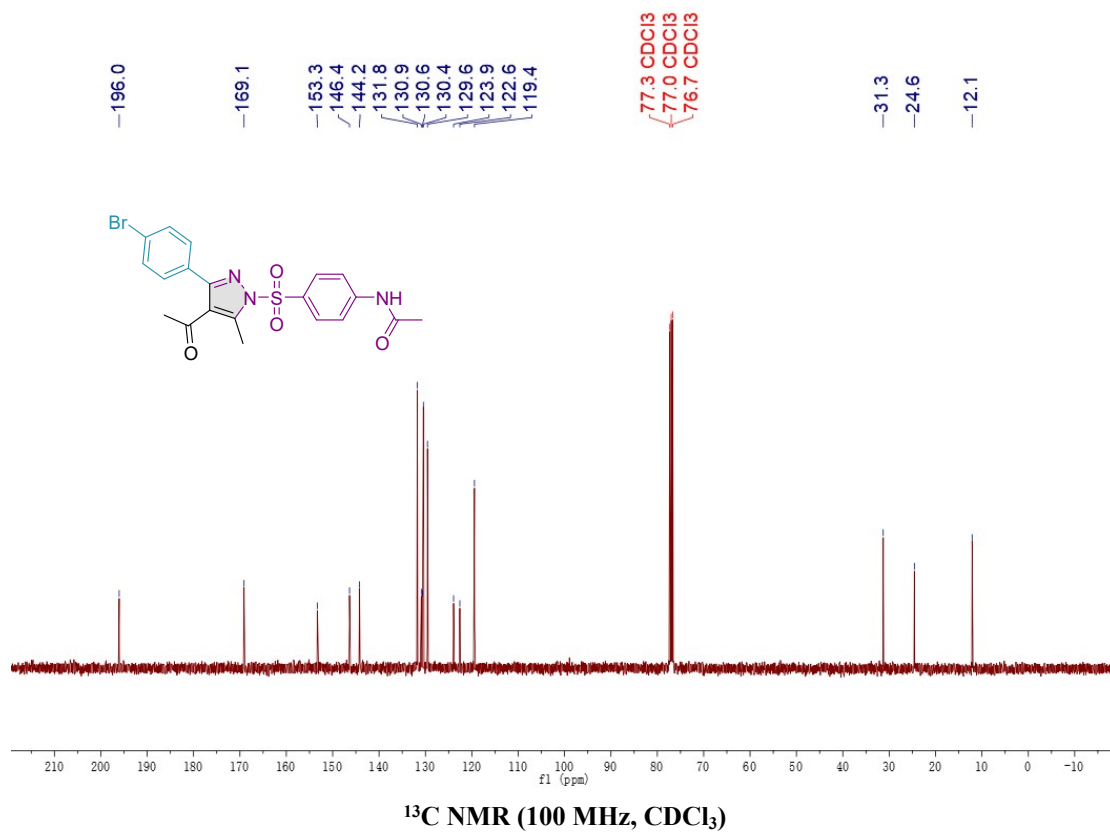

1-(3-(4-bromophenyl)-1-((5-chloro-2-methoxyphenyl)sulfonyl)-5-methyl-1H-pyrazol-4-yl)ethan-1-one (4ay)

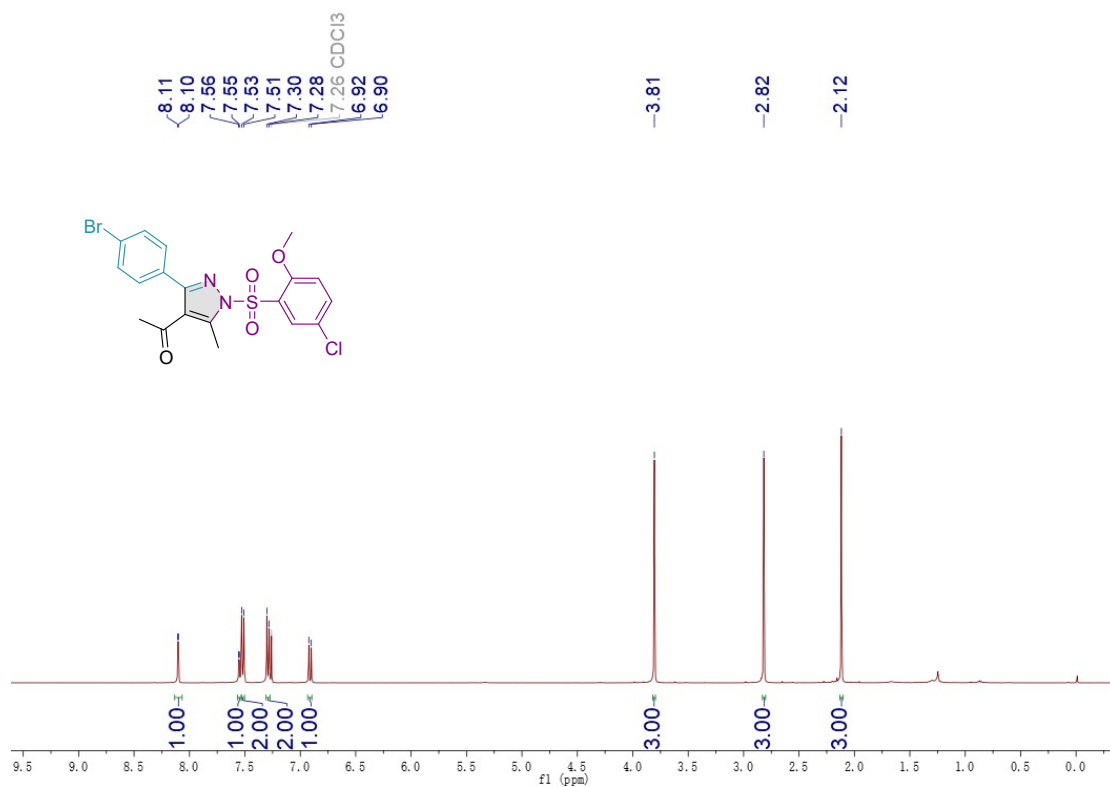

<sup>1</sup>H NMR (400 MHz, CDCl<sub>3</sub>)

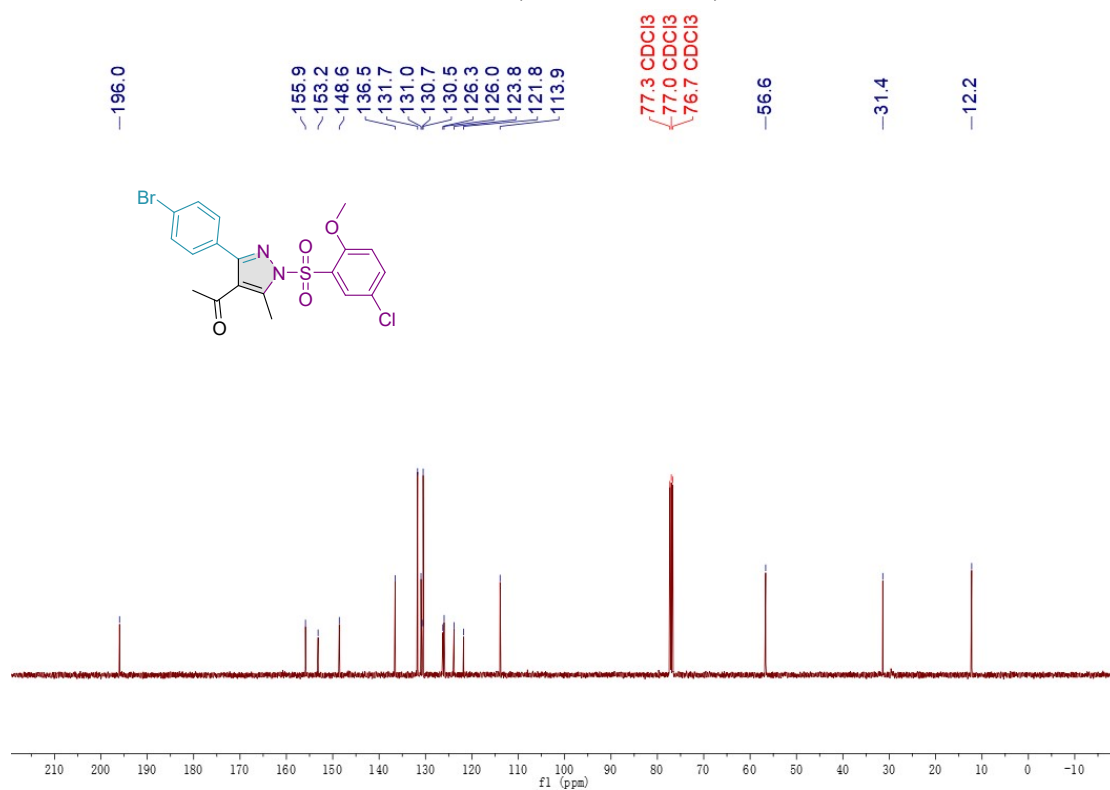

<sup>13</sup>C NMR (100 MHz, CDCl<sub>3</sub>)

1-(3-(4-bromophenyl)-1-((2,4-dimethoxyphenyl)sulfonyl)-5-methyl-1H-pyrazol-4-yl)ethan-1-one  
(4az)

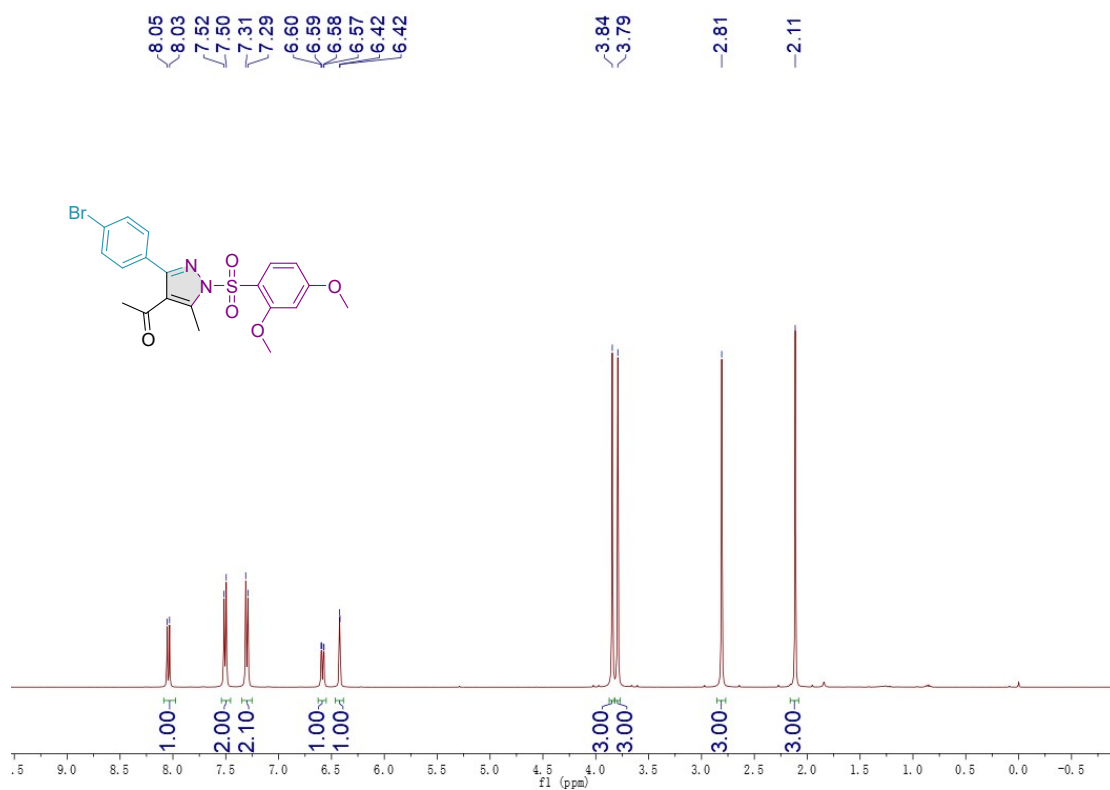

<sup>1</sup>H NMR (400 MHz, CDCl<sub>3</sub>)

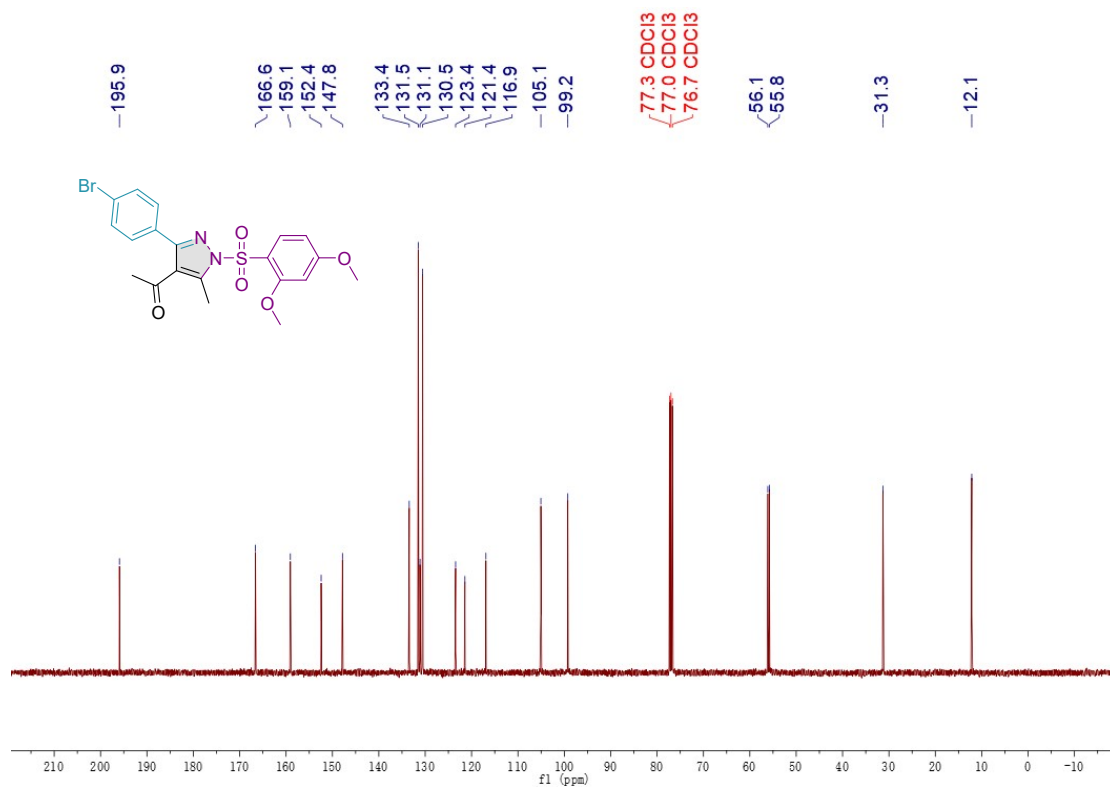

<sup>13</sup>C NMR (100 MHz, CDCl<sub>3</sub>)

1-(3-(4-bromophenyl)-1-((4-chlorophenyl)sulfonyl)-5-methyl-1H-pyrazol-4-yl)ethan-1-one (4ba)

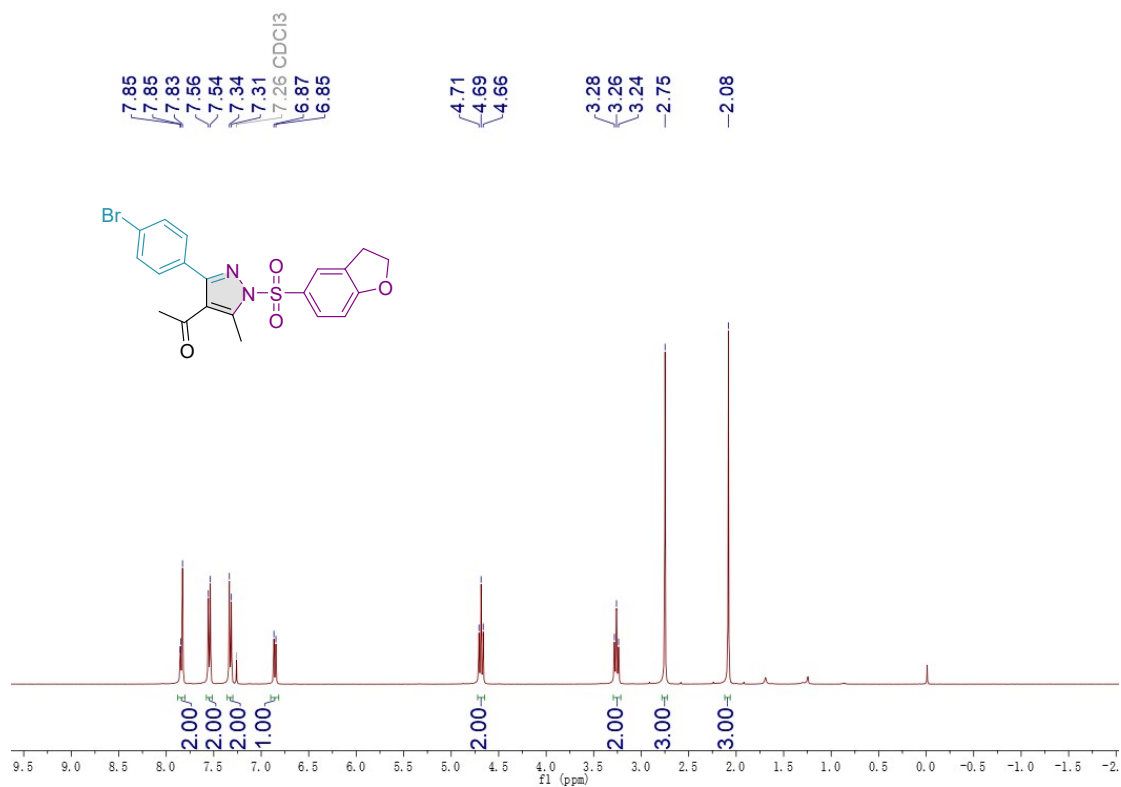

<sup>1</sup>H NMR (400 MHz, CDCl<sub>3</sub>)

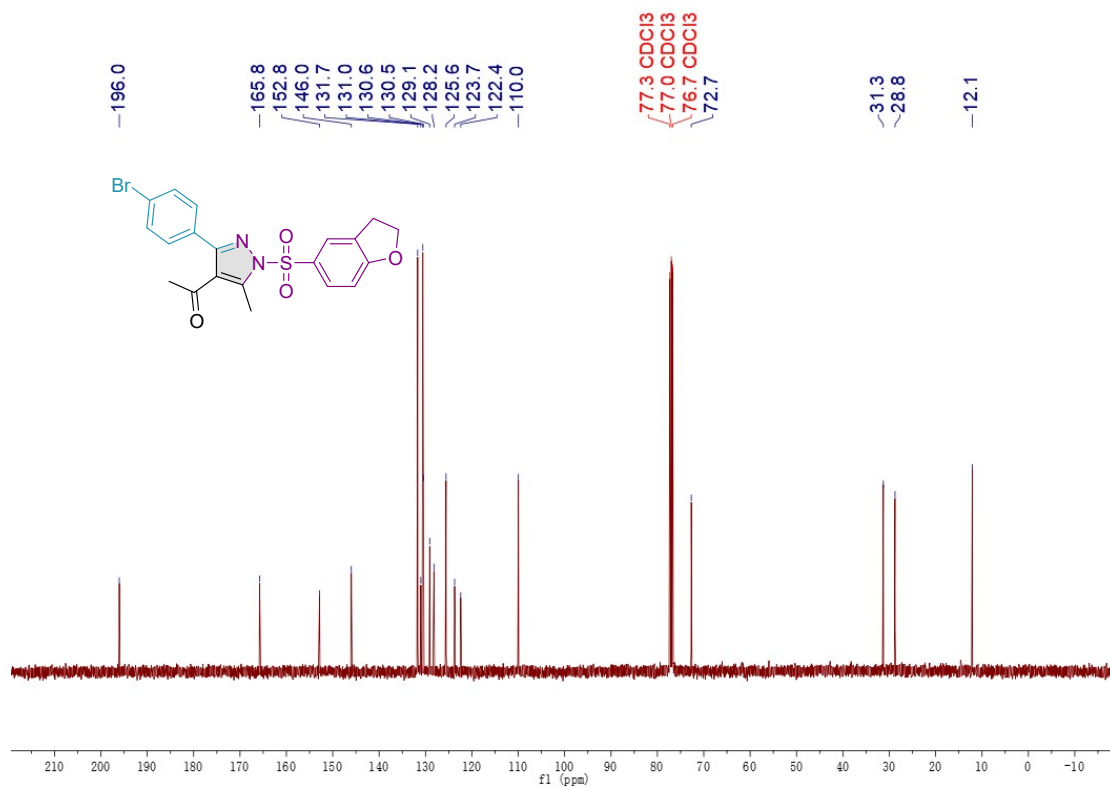

<sup>13</sup>C NMR (100 MHz, CDCl<sub>3</sub>)

1-(3-(4-bromophenyl)-5-methyl-1H-pyrazol-4-yl)ethan-1-one (4bb)

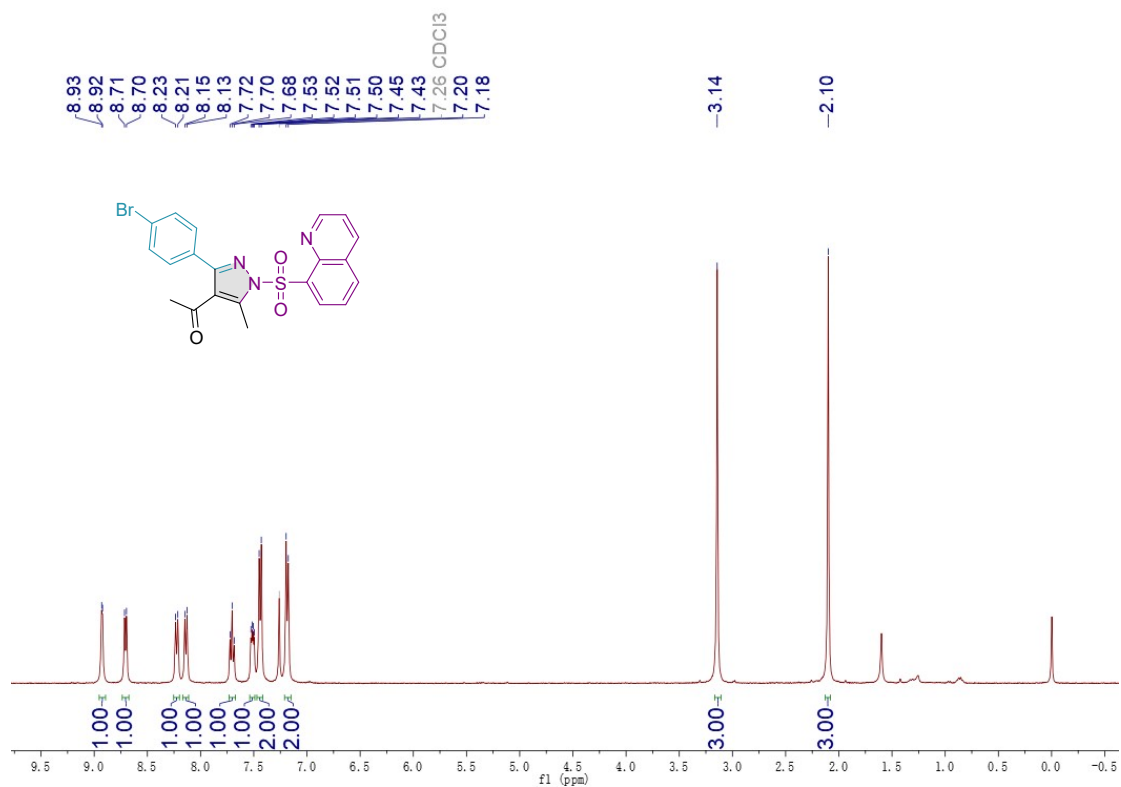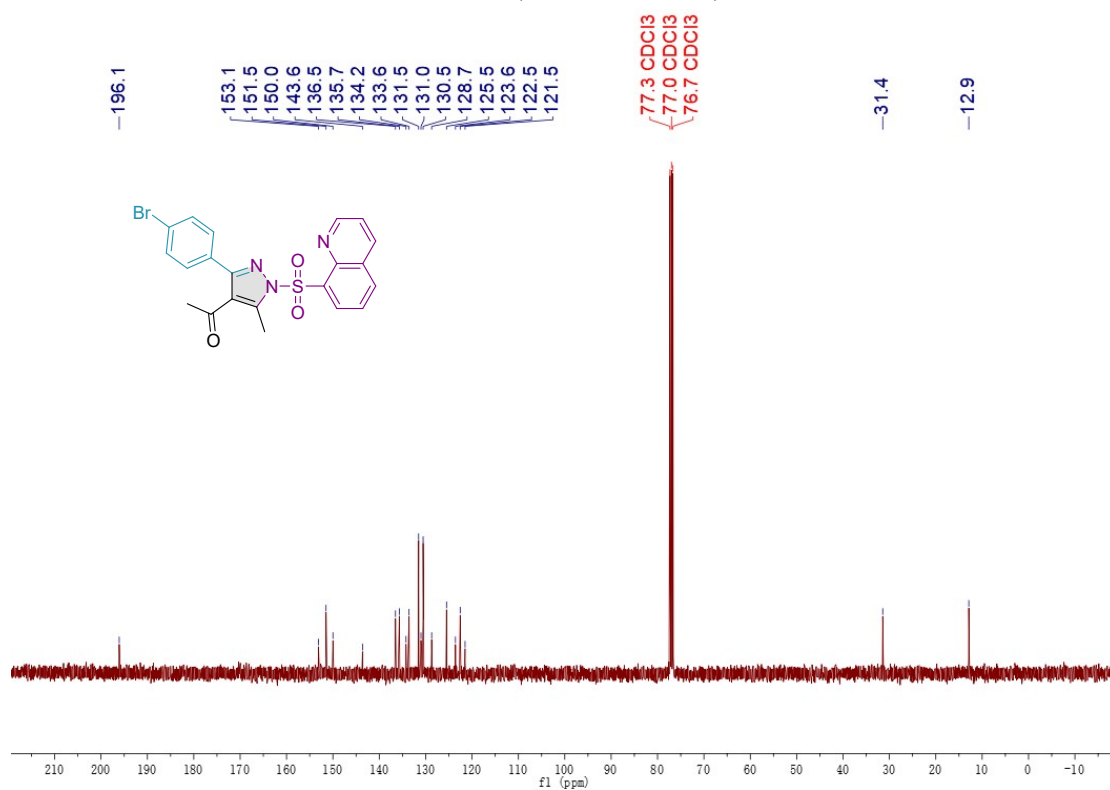

**1-(3-(4-bromophenyl)-5-methyl-1-(naphthalen-1-ylsulfonyl)-1H-pyrazol-4-yl)ethan-1-one (4bc)**

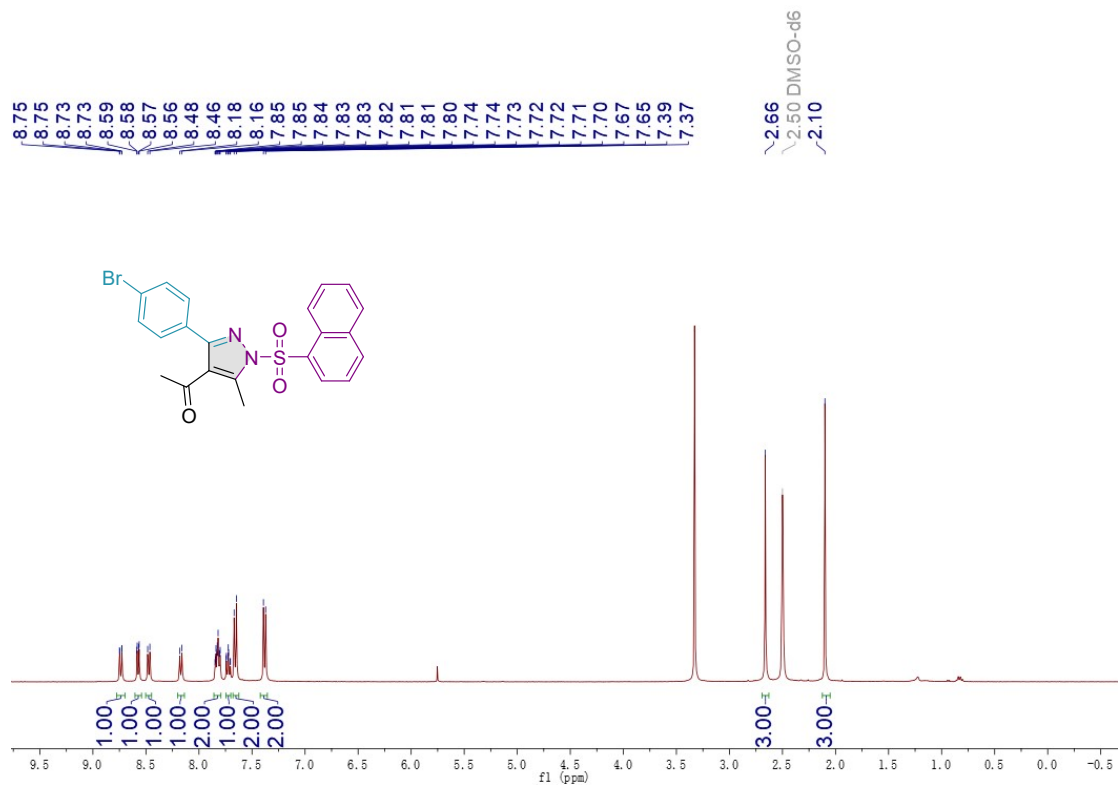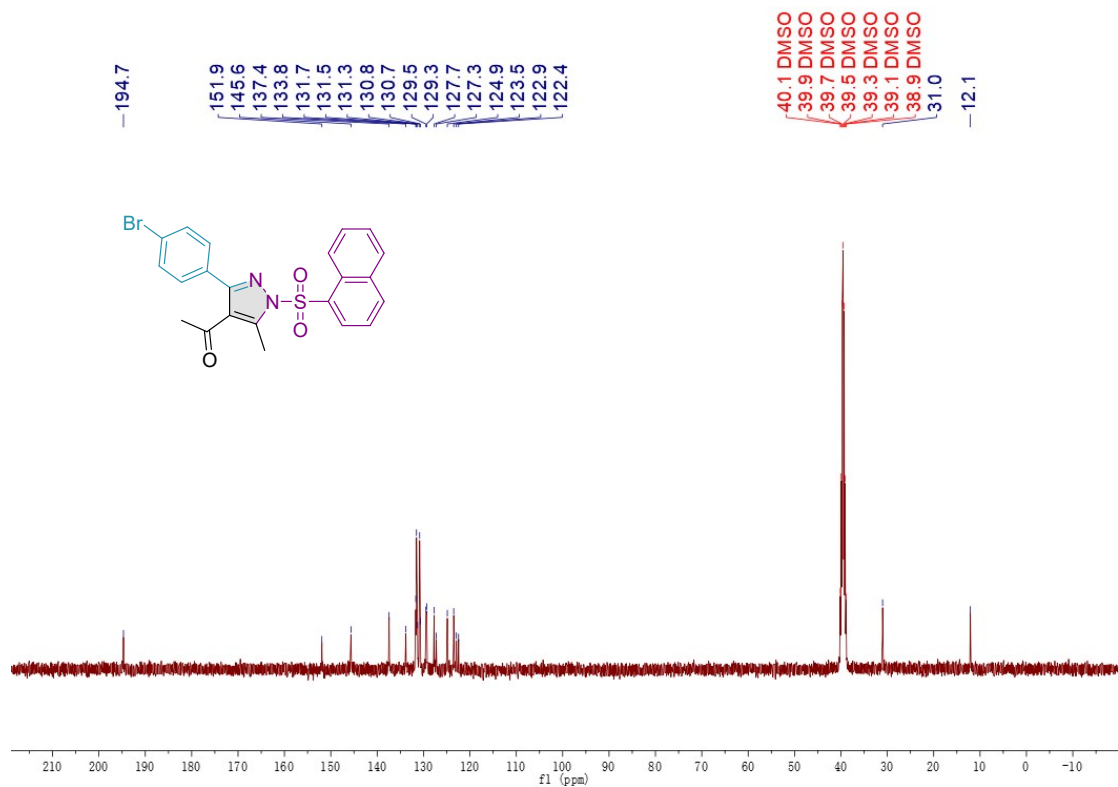

**1-(3-(4-bromophenyl)-5-methyl-1-(naphthalen-2-ylsulfonyl)-1H-pyrazol-4-yl)ethan-1-one (4bd)**

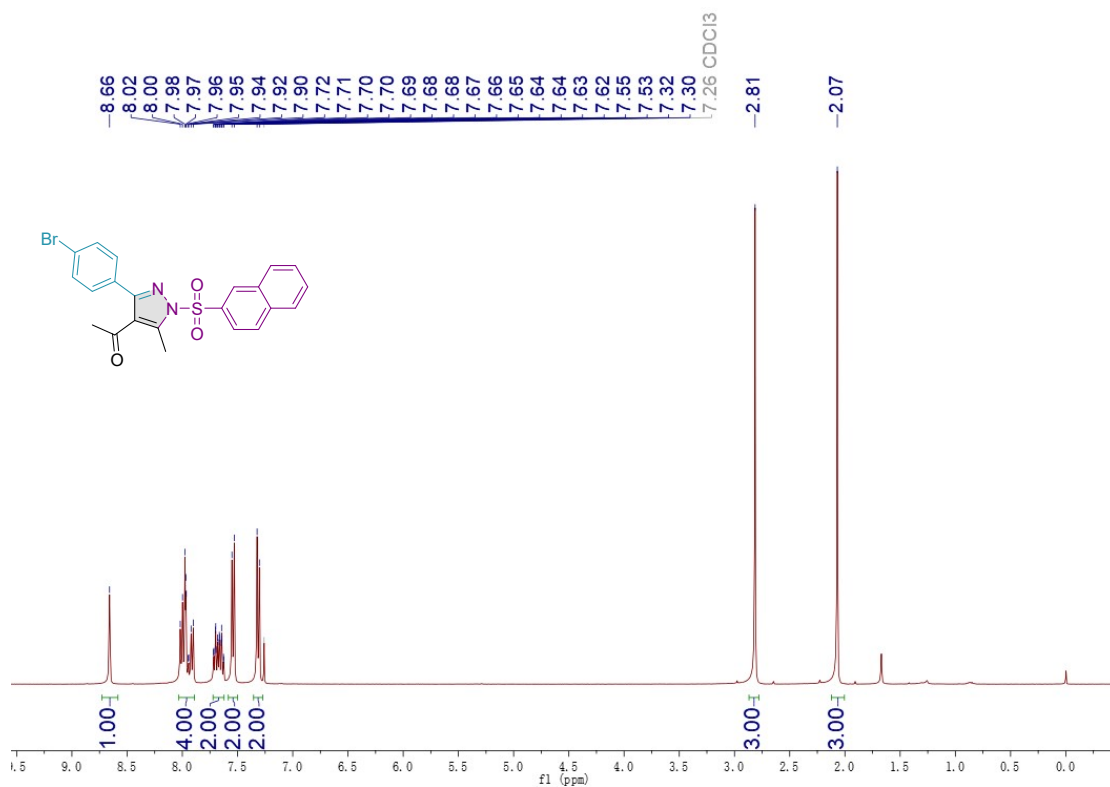

<sup>1</sup>H NMR (400 MHz, CDCl<sub>3</sub>)

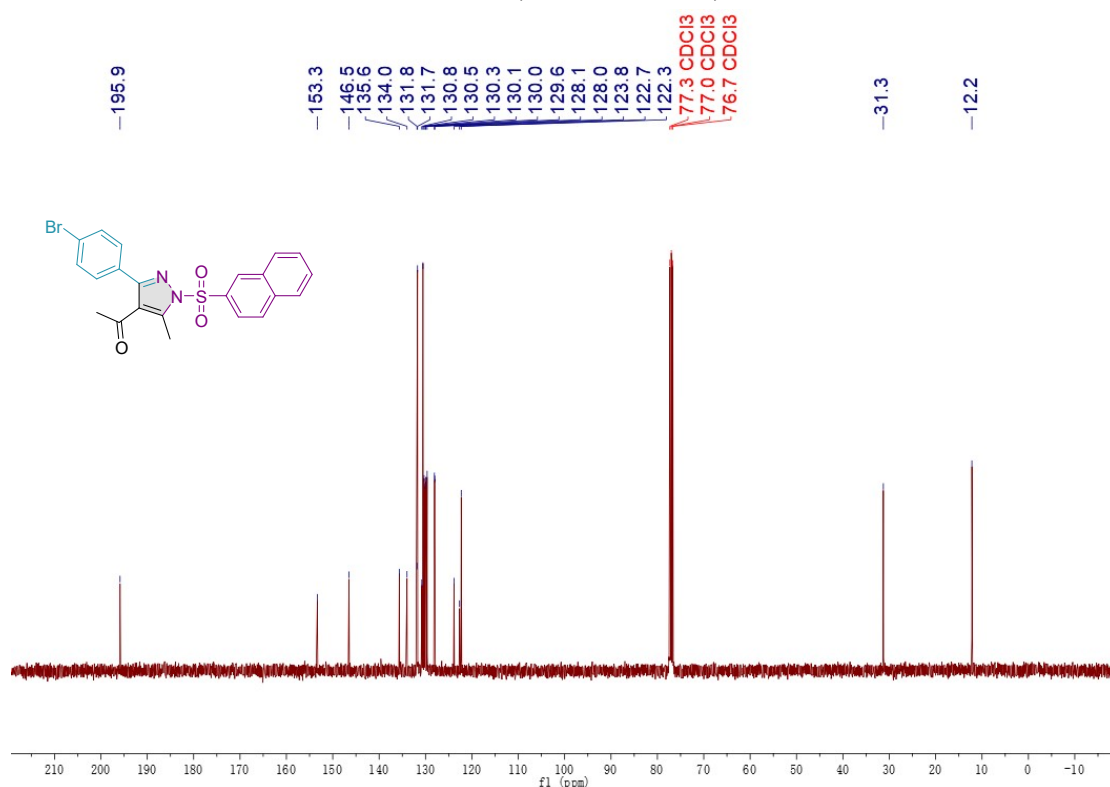

<sup>13</sup>C NMR (100 MHz, CDCl<sub>3</sub>)

1-(3-(4-bromophenyl)-5-methyl-1-(morpholinosulfonyl)-1H-pyrazol-4-yl)ethan-1-one (4be)

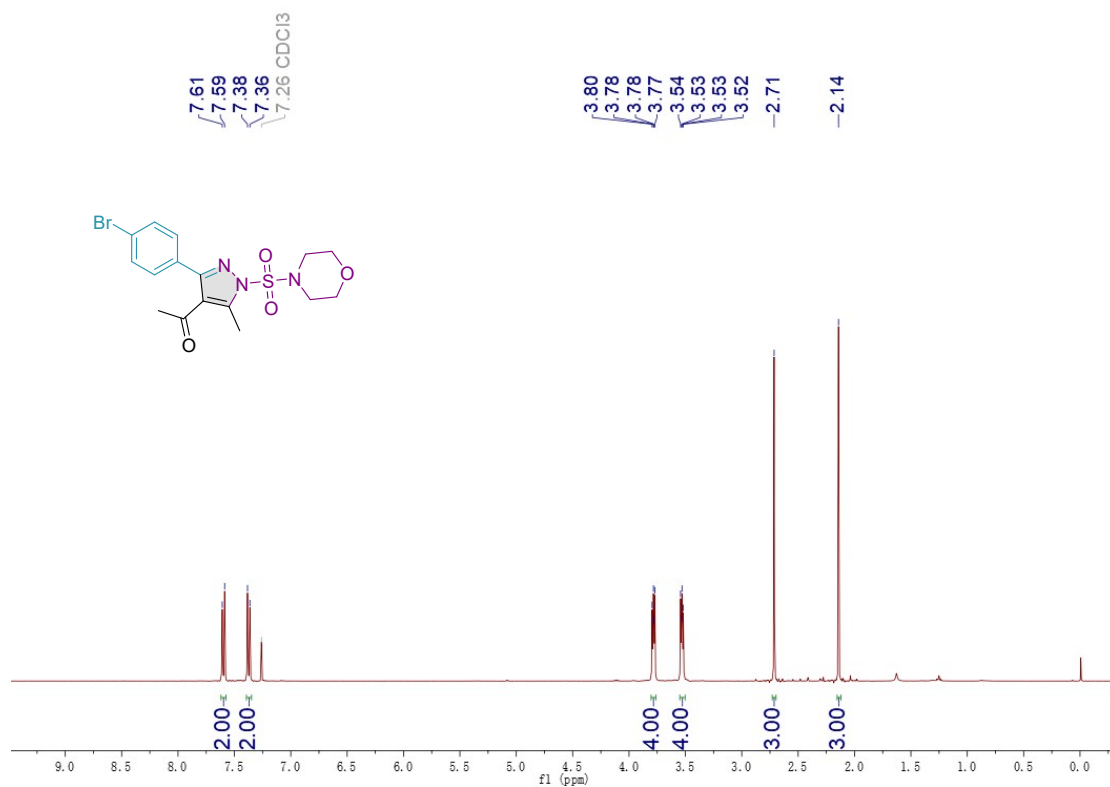

<sup>1</sup>H NMR (400 MHz, CDCl<sub>3</sub>)

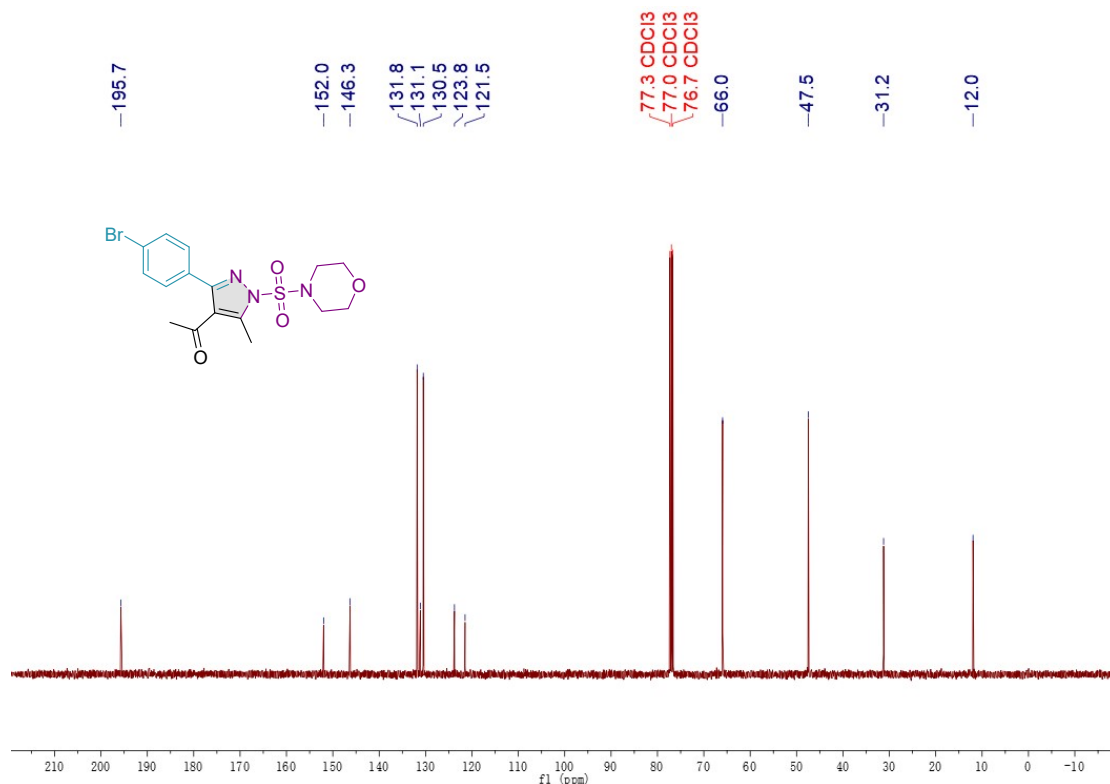

<sup>13</sup>C NMR (100 MHz, CDCl<sub>3</sub>)

1-(3-(4-bromophenyl)-1-(ethylsulfonyl)-5-methyl-1H-pyrazol-4-yl)ethan-1-one (4bf)



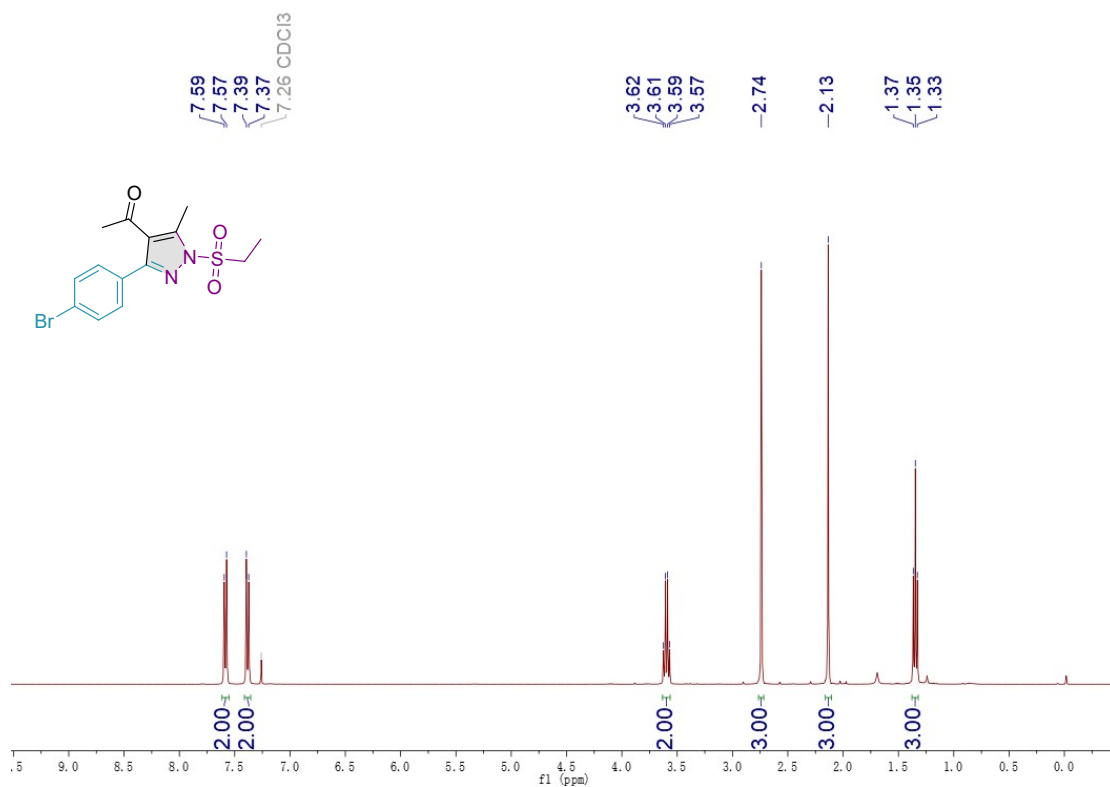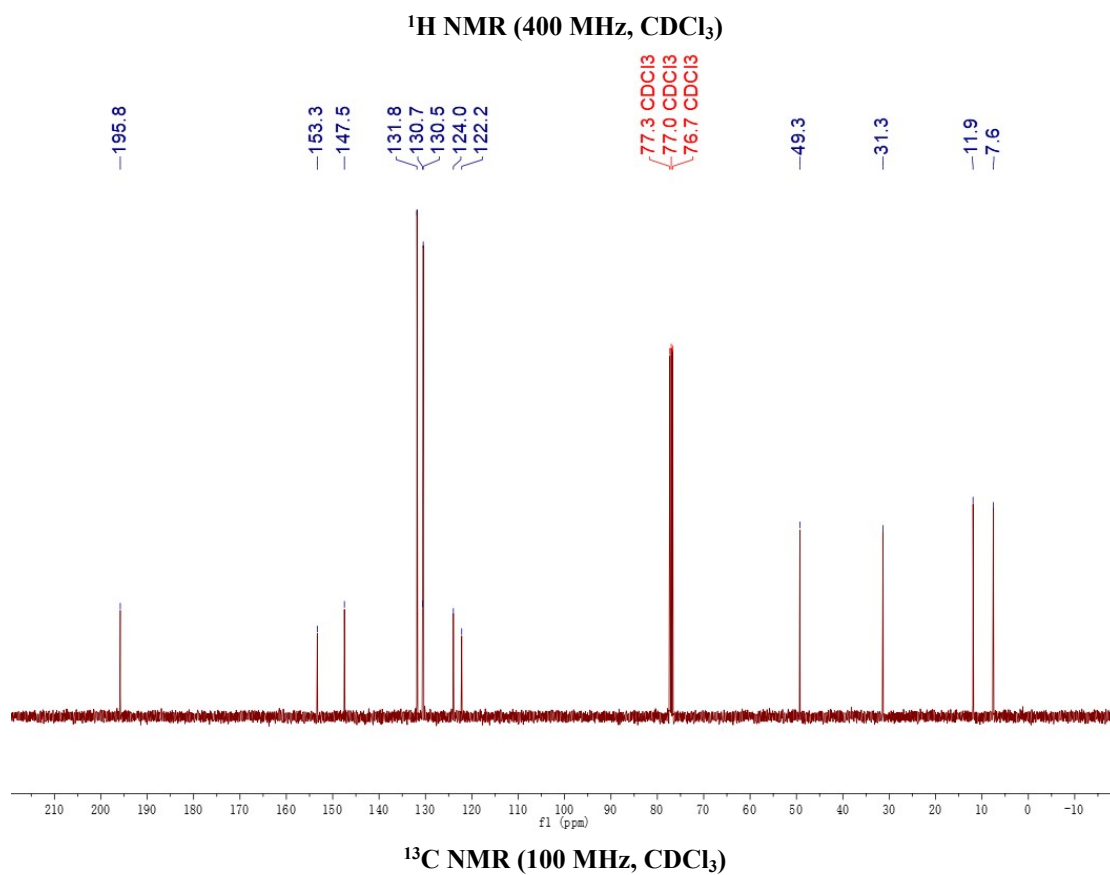

1-(3-(4-bromophenyl)-1-(cyclopropylsulfonyl)-5-methyl-1H-pyrazol-4-yl)ethan-1-one (4bg)

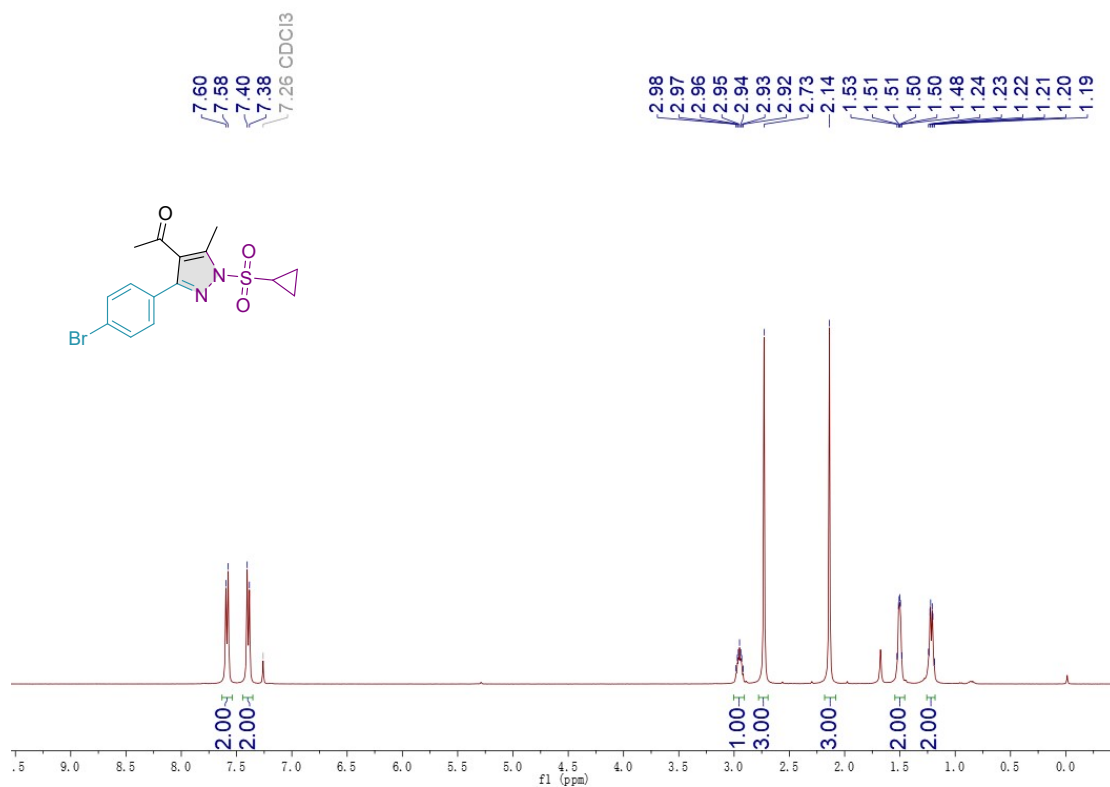

**<sup>1</sup>H NMR (400 MHz, CDCl<sub>3</sub>)**

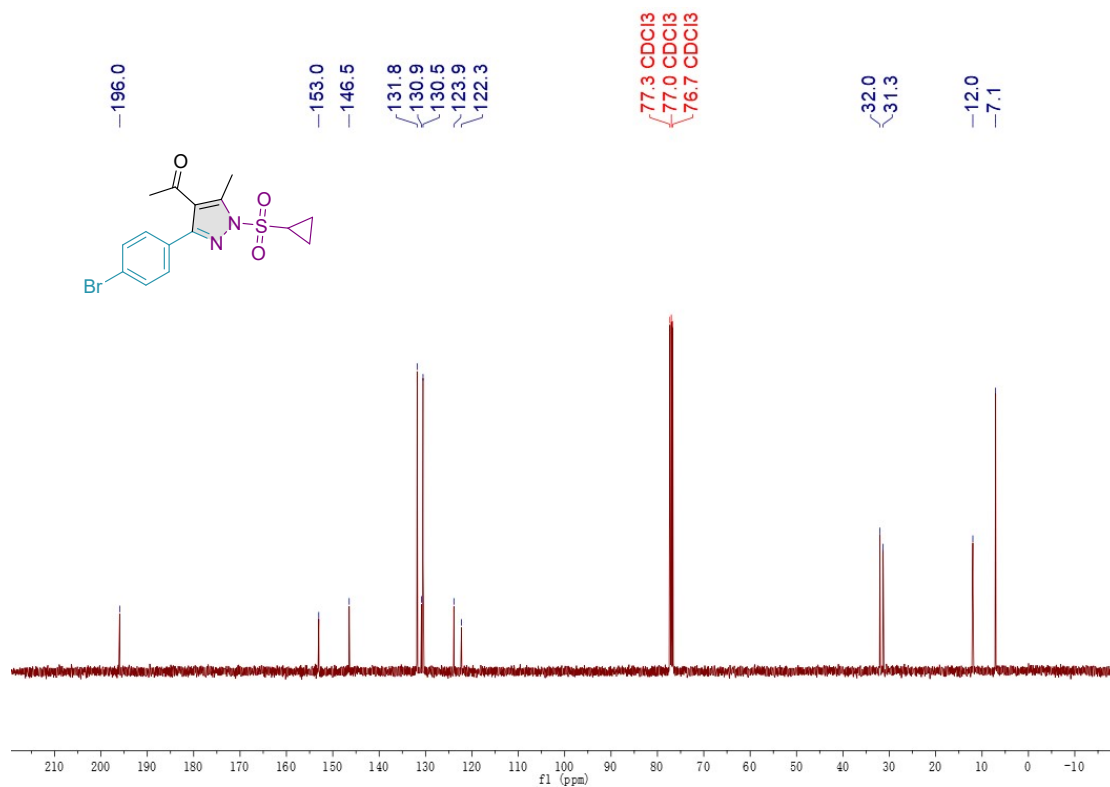

**<sup>13</sup>C NMR (100 MHz, CDCl<sub>3</sub>)**

**1-(3-(4-bromophenyl)-1-((2-chloroethyl)sulfonyl)-5-methyl-1H-pyrazol-4-yl)ethan-1-one (4bh)**

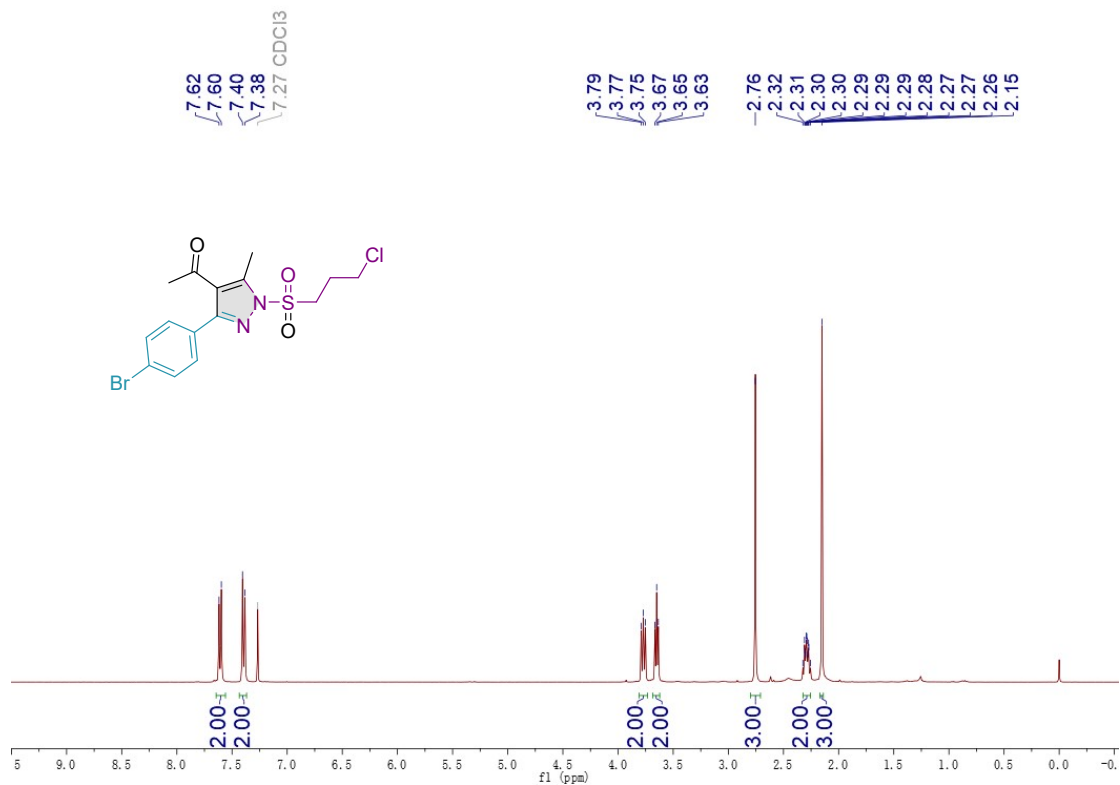

<sup>1</sup>H NMR (400 MHz, CDCl<sub>3</sub>)

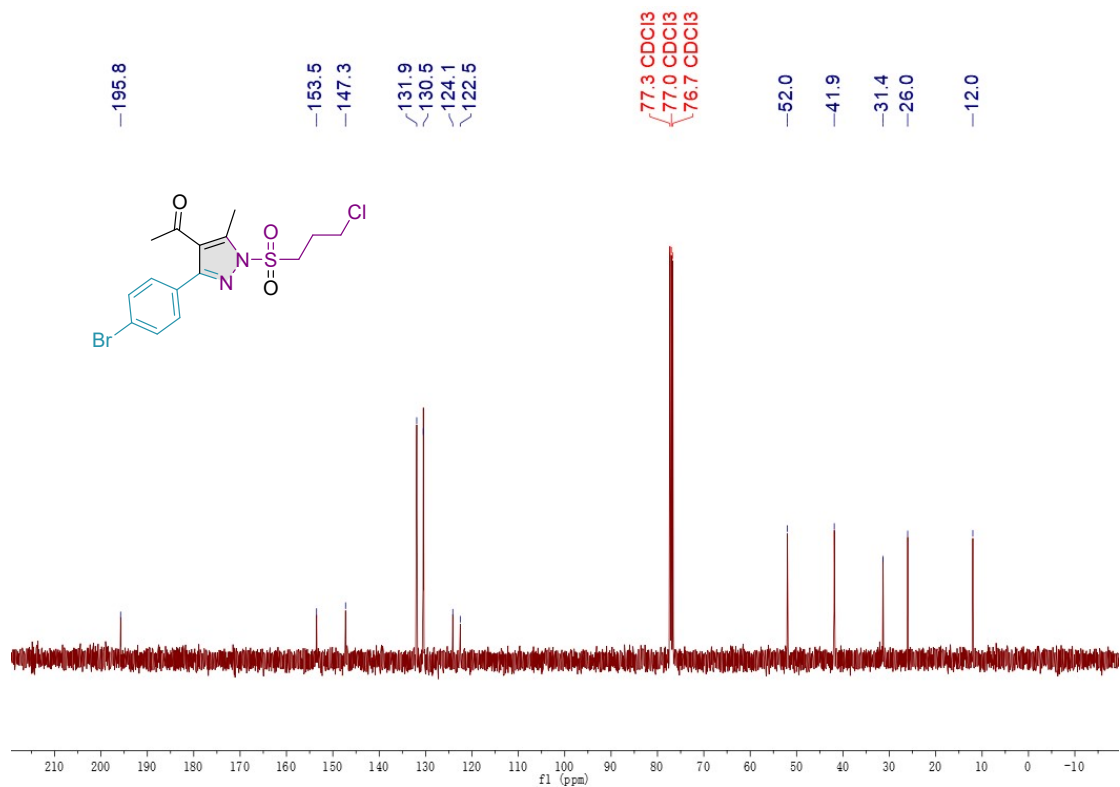

<sup>13</sup>C NMR (100 MHz, CDCl<sub>3</sub>)

1-(3-(4-bromophenyl)-1-(butylsulfonyl)-5-methyl-1H-pyrazol-4-yl)ethan-1-one (4bi)

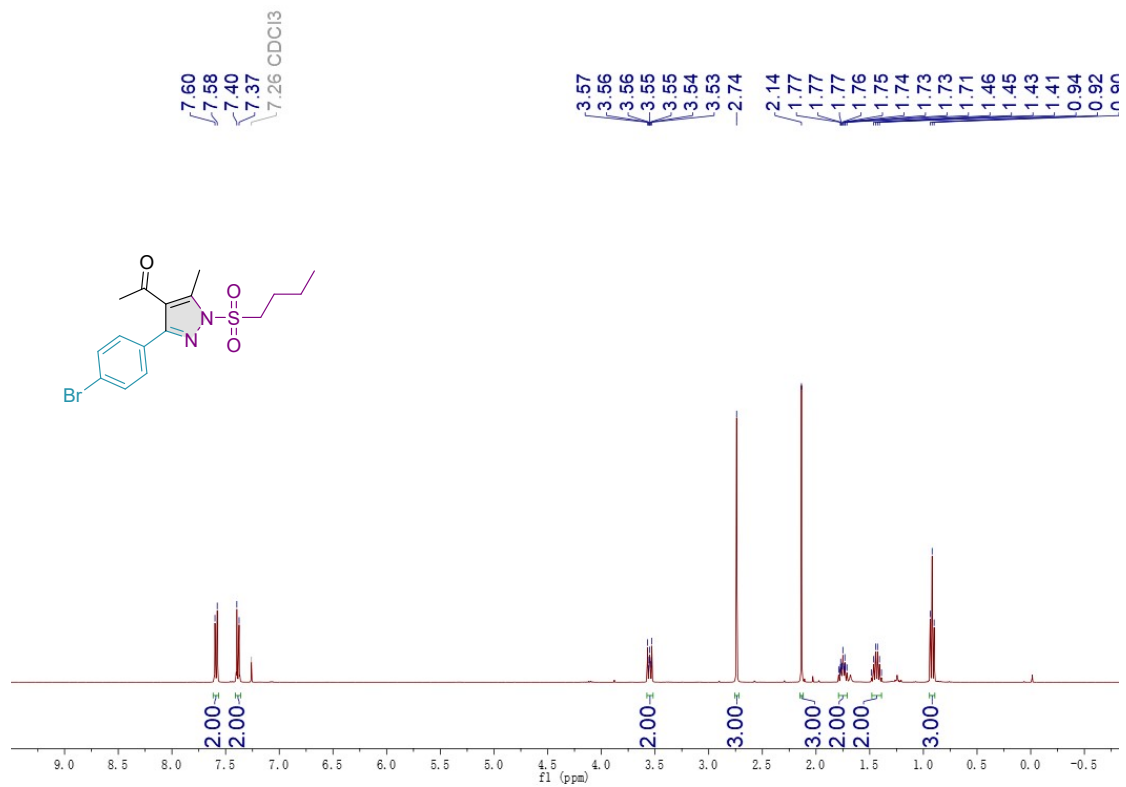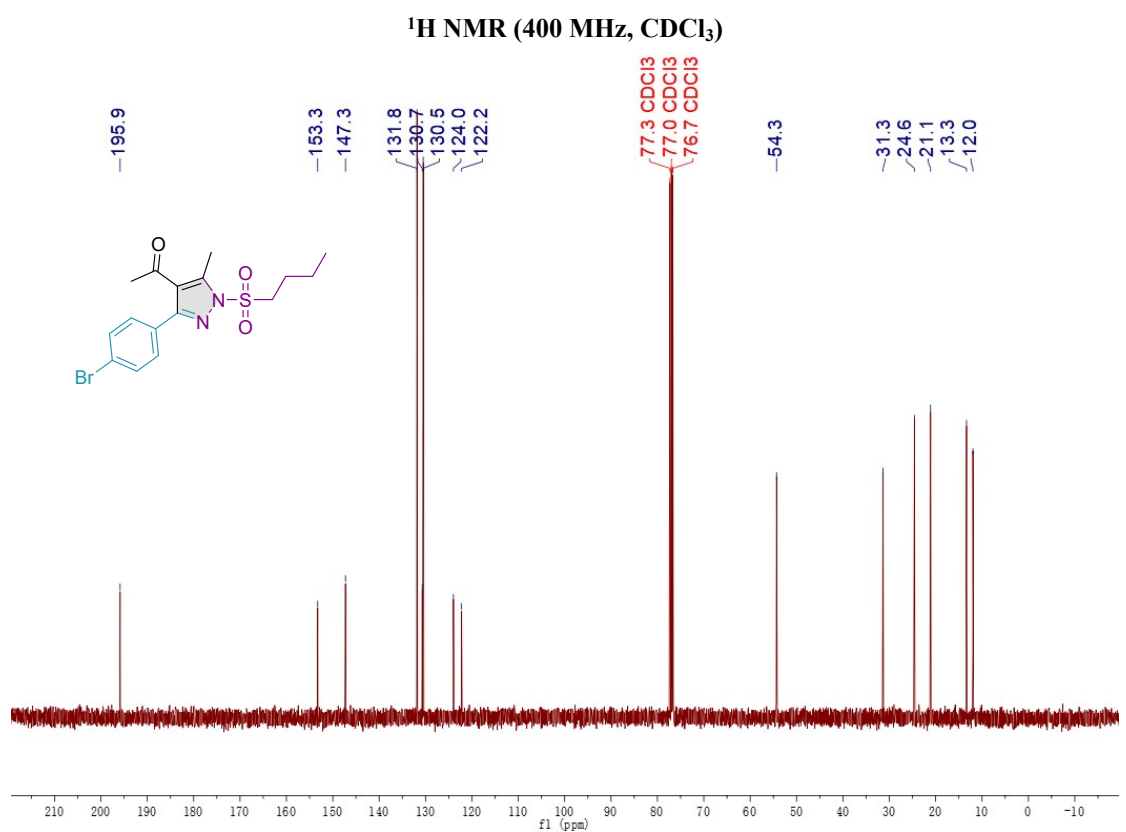



1-(3-(4-bromophenyl)-1-((5-chlorothiophen-2-yl)sulfonyl)-5-methyl-1H-pyrazol-4-yl)ethan-1-one  
(4bk)

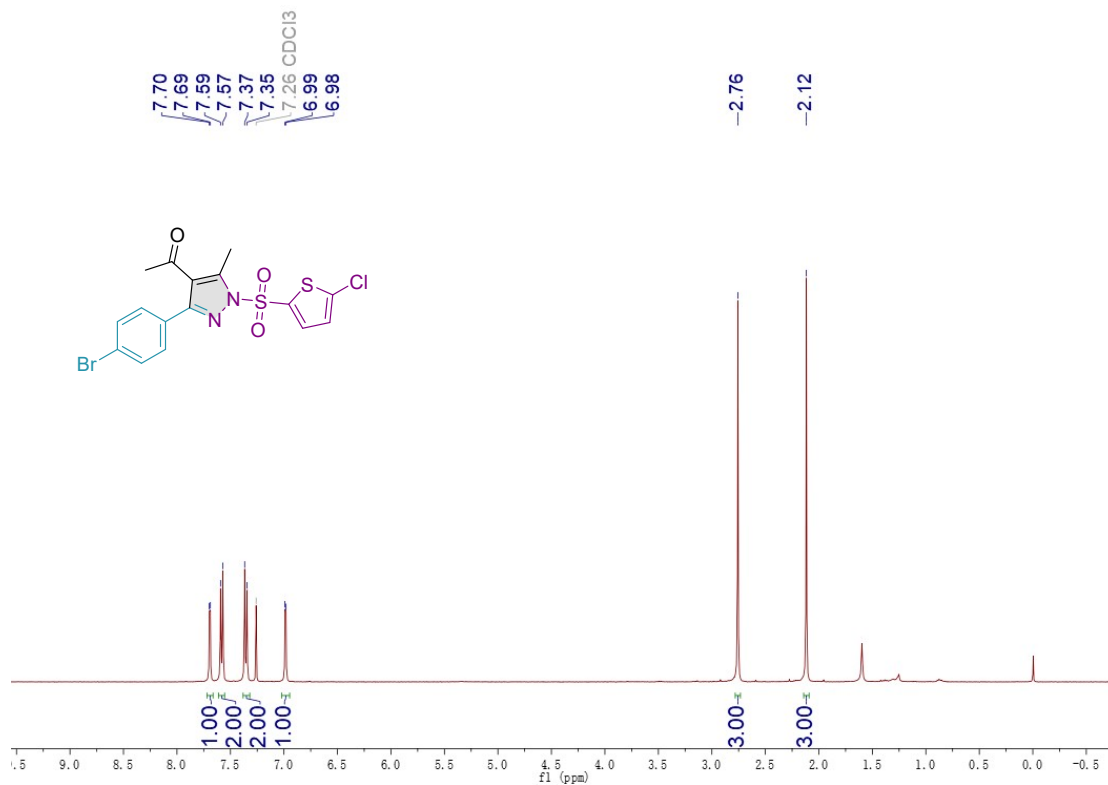

<sup>1</sup>H NMR (400 MHz, CDCl<sub>3</sub>)

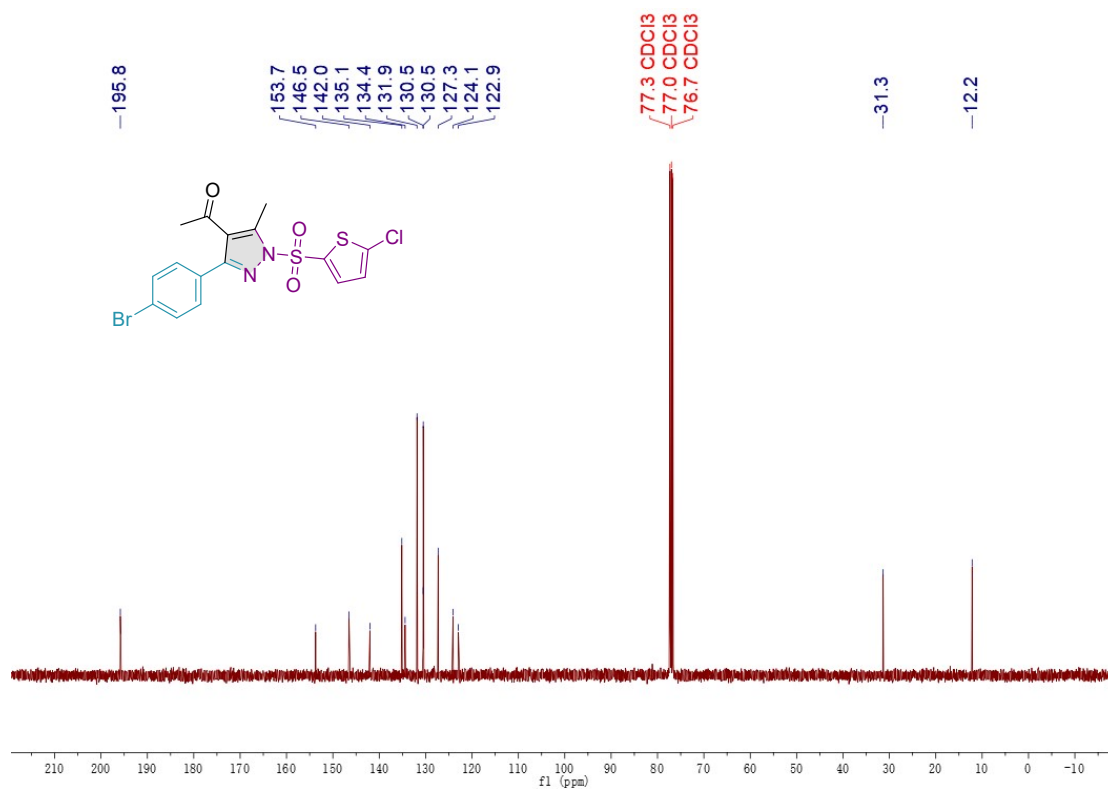

<sup>13</sup>C NMR (100 MHz, CDCl<sub>3</sub>)

## References and Notes

1. , Gaussian 16, Revision A.03 M. J. Frisch, G. W. Trucks, H. B. Schlegel, G. E. Scuseria, M. A. Robb, J. R. Cheeseman, G. Scalmani, V. Barone, G. A. Petersson, H. Nakatsuji, X. Li, M. Caricato, A. V. Marenich, J. Bloino, B. G. Janesko, R. Gomperts, B. Mennucci, H. P. Hratchian, J. V. Ortiz, A. F. Izmaylov, J. L. Sonnenberg, D. Williams-Young, F. Ding, F. Lipparini, F. Egidi, J. Goings, B. Peng, A. Petrone, T. Henderson, D. Ranasinghe, V. G. Zakrzewski, J. Gao, N. Rega, G. Zheng, W. Liang, M. Hada, M. Ehara, K. Toyota, R. Fukuda, J. Hasegawa, M. Ishida, T. Nakajima, Y. Honda, O. Kitao, H. Nakai, T. Vreven, K. Throssell, J. A. Montgomery, Jr., J. E. Peralta, F. Ogliaro, M. J. Bearpark, J. J. Heyd, E. N. Brothers, K. N. Kudin, V. N. Staroverov, T. A. Keith, R. Kobayashi, J. Normand, K. Raghavachari, A. P. Rendell, J. C. Burant, S. S. Iyengar, J. Tomasi, M. Cossi, J. M. Millam, M. Klene, C. Adamo, R. Cammi, J. W. Ochterski, R. L. Martin, K. Morokuma, O. Farkas, J. B. Foresman, and D. J. Fox, Gaussian, Inc., Wallingford CT, 2016.
2. , C. Y. Legault, CYLview20, Visualization and analysis software for computational chemistry, <http://www.cylview.org>.
3. , T. Lu, sobMECP program; <http://sobereva.com/286>.
4. (a) T. Lu, A comprehensive electron wavefunction analysis toolbox for chemists, Multiwfn, *J. Chem. Phys.*, 2024, **161**; (b) T. Lu, F. Chen, Multiwfn: A multifunctional wavefunction analyzer, *J. Comput. Chem.*, 2011, **33**, 580-592.
5. W. Humphrey, A. Dalke, K. Schulten, VMD: Visual molecular dynamics, *J. Mol. Graph.* , 1996, **14**, 33-38.
